# Supplementary material for: Sex-Specific Proteomics Changes Induced by Genetic Deletion of the Fibroblast Growth Factor 14 (FGF14) Regulator of Neuronal Ion Channels
Source: Preprints.org preprint supplement (doi:10.20944/preprints201811.0463.v1), 2018-11-19
Supplement: Supplementary file 1 [file supplementary]

## Sheet: Summary
LFQ intensities log2 transformed
Values filtered as a minimum of 3 per group (3 independent measurements in F wt, F ko, M wt, M ko)
Filitered out proteins only identified by site, potential contaminants, and reverse hits as defined by the maxquant output table Proteingroups.txt and using their contaminants fasta for searching
Significant proteins were identifed using Satistical analysis of microarray in Perseus 1.6.0.7 with a permutation based FDR 0.05, s0 0.1
Fold changes were taken as the averages of the replicated and values were log2 transformed so it's the difference of the log average in each group

## Sheet: F_KO
Significant	neglog(pval)	Log2(KO/WT)	Protein IDs	Majority protein IDs	Protein names	Gene names	Peptides	Razor + unique peptides	Unique peptides	Sequence coverage [%]	Unique + razor sequence coverage [%]	Unique sequence coverage [%]	Mol. weight [kDa]	Q-value	Score	Intensity	MS/MS count	Razor + unique peptides F_KO_02	Razor + unique peptides F_KO_05	Razor + unique peptides F_KO_09	Razor + unique peptides F_WT_04	Razor + unique peptides F_WT_08	Razor + unique peptides F_WT_11	Razor + unique peptides M_KO_03	Razor + unique peptides M_KO_07	Razor + unique peptides M_KO_12	Razor + unique peptides M_WT_01	Razor + unique peptides M_WT_06	Razor + unique peptides M_WT_10	Unique peptides F_KO_02	Unique peptides F_KO_05	Unique peptides F_KO_09	Unique peptides F_WT_04	Unique peptides F_WT_08	Unique peptides F_WT_11	Unique peptides M_KO_03	Unique peptides M_KO_07	Unique peptides M_KO_12	Unique peptides M_WT_01	Unique peptides M_WT_06	Unique peptides M_WT_10	LFQ intensity F_KO_02	LFQ intensity F_KO_05	LFQ intensity F_KO_09	LFQ intensity F_WT_04	LFQ intensity F_WT_08	LFQ intensity F_WT_11	LFQ intensity M_KO_03	LFQ intensity M_KO_07
+	4.36303	-1.0986	S4R2M6;Q8BG13;O89086	S4R2M6;Q8BG13;O89086	RNA-binding protein 3	Rbm3	2	2	2	55.6	55.6	55.6	9.7265	0	17.571	89760000	14	1	1	1	1	2	1	2	2	2	1	1	2	1	1	1	1	2	1	2	2	2	1	1	2	22.4826	22.5384	22.3744	23.6197	23.513	23.5585	23.7113	23.7326
+	2.91081	1.18634	P00848	P00848	ATP synthase subunit a	Mtatp6	1	1	1	4.4	4.4	4.4	25.095	0.0013593	2.957	26433000	3	1	1	1	1	1	1	1	1	1	1	1	1	1	1	1	1	1	1	1	1	1	1	1	1	21.8456	22.314	22.0305	20.8864	20.96	20.7846	21.5582	21.0497
+	3.0856	0.874697	P60879;B0R029;E9Q8A1;B0R030;Q9D3L3;O09044	P60879	Synaptosomal-associated protein 25	Snap25	14	14	3	66.5	66.5	15	23.315	0	323.31	2920000000	821	14	13	14	13	12	12	13	13	14	13	13	13	3	2	3	2	2	2	3	3	3	3	3	3	28.4609	28.2318	28.3418	27.6039	27.4407	27.3659	28.4749	28.2962
+	4.1489	-0.557827	P62897;CON__P62894;P00015	P62897	Cytochrome c, somatic	Cycs	7	7	7	56.2	56.2	56.2	11.605	0	198.14	2635800000	463	7	7	7	7	7	7	7	7	7	7	7	7	7	7	7	7	7	7	7	7	7	7	7	7	27.6986	27.6851	27.7225	28.2339	28.224	28.3217	27.588	27.6487
+	3.50236	-0.588498	Q08331;Q8CCS7	Q08331;Q8CCS7	Calretinin	Calb2	8	7	7	36.2	32.1	32.1	31.372	0	40.139	326360000	102	5	6	6	6	5	5	6	6	5	6	7	6	5	6	6	6	5	5	6	6	5	6	7	6	24.5427	24.4902	24.5442	25.0569	25.0773	25.2084	25.1892	25.0761
	0.0216476	-0.00712522	A0A067XG53;O70589-3;O70589-4;O70589-5;O70589;O70589-2;F6ZQR2;F6Y9I5	A0A067XG53;O70589-3;O70589-4;O70589-5;O70589;O70589-2;F6ZQR2	Peripheral plasma membrane protein CASK	Cask	6	6	6	8.6	8.6	8.6	99.226	0	24.1	90499000	22	6	5	6	6	6	5	5	6	6	6	6	6	6	5	6	6	6	5	5	6	6	6	6	6	23.0287	23.2661	23.2917	23.2328	23.3077	23.0673	23.0255	23.0519
	0.105232	0.138262	F8WGL9;A0A087WS49;A0A087WNP6;Q4VAA2-2;Q4VAA2;A0A087WRM0	F8WGL9;A0A087WS49;A0A087WNP6;Q4VAA2-2;Q4VAA2;A0A087WRM0	Protein CDV3	Cdv3	2	2	2	50.5	50.5	50.5	11.85	0	21.188	59419000	27	2	1	1	1	1	1	2	1	2	2	2	2	2	1	1	1	1	1	2	1	2	2	2	2	22.0872	22.7831	22.9591	22.7164	21.7048	22.9934	22.453	22.1335
	0.241499	-0.203634	A0A087WQE6;A0A087WNT1;P83940;A0A087WPE4	A0A087WQE6;A0A087WNT1;P83940;A0A087WPE4	Transcription elongation factor B polypeptide 1	Tceb1	3	3	3	48.4	48.4	48.4	10.657	0	31.428	135030000	6	3	3	2	2	2	3	3	2	2	3	2	2	3	3	2	2	2	3	3	2	2	3	2	2	23.5054	23.0139	24.0867	23.9453	23.743	23.5286	24.0024	23.5475
	0.170355	0.0781377	A0A087WNV1;A0A087WSR7;A0A087WR52;Q8K2K6-3;Q8K2K6-1;Q8K2K6;Q8K2K6-2;A0A087WRL1	A0A087WNV1;A0A087WSR7;A0A087WR52;Q8K2K6-3;Q8K2K6-1;Q8K2K6;Q8K2K6-2	Arf-GAP domain and FG repeat-containing protein 1	Agfg1	3	3	3	12.5	12.5	12.5	53.974	0	6.6752	42293000	2	2	3	2	3	3	2	2	3	2	3	3	3	2	3	2	3	3	2	2	3	2	3	3	3	22.068	21.9328	22.2023	21.8903	21.7851	22.2934	21.8112	22.1025
	0.0810509	0.0300706	Q3TYE5;A0A087WP80;Q8BLK3;A0A087WP06;A0A087WP70;F6SB80	Q3TYE5;A0A087WP80;Q8BLK3	Limbic system-associated membrane protein	Lsamp	7	7	7	27.5	27.5	27.5	37.31	0	35.911	194940000	197	6	6	6	7	5	6	4	6	5	6	6	5	6	6	6	7	5	6	4	6	5	6	6	5	24.3393	24.0752	24.1493	23.9648	24.1835	24.3252	24.0338	24.1497
	2.19356	-0.376422	A0A087WPL5;E9QNN1;O70133-3;O70133;O70133-2;A0A0R4J2C3;Q3UR42	A0A087WPL5;E9QNN1;O70133-3;O70133;O70133-2	ATP-dependent RNA helicase A	Dhx9	10	10	10	10.3	10.3	10.3	149.62	0	42.258	161330000	42	8	9	6	10	9	6	8	9	7	8	8	6	8	9	6	10	9	6	8	9	7	8	8	6	23.8715	23.8378	23.7348	24.086	24.2907	24.1967	23.6292	23.8445
	0.295778	-0.0451145	A0A087WRS3;A0A087WPP8;Q6AXH6;Q6AXD2;P62484;A0A087WR90;A0A087WNT3	A0A087WRS3;A0A087WPP8;Q6AXH6;Q6AXD2;P62484;A0A087WR90	Abl interactor 2	Abi2	7	5	5	20.5	15.1	15.1	49.358	0	49.212	122730000	60	4	4	5	5	4	3	4	3	4	5	3	4	4	4	5	5	4	3	4	3	4	5	3	4	23.7201	23.6924	23.536	23.6651	23.6782	23.7405	23.4958	23.1984
	0.67463	-0.0786775	A0A087WPR1;P20917-2;P20917;Q3ZB60;A0A087WRD6	A0A087WPR1;P20917-2;P20917;Q3ZB60	Myelin-associated glycoprotein	Mag	11	11	11	22.8	22.8	22.8	69.387	0	71.806	901040000	231	10	9	7	8	8	8	9	8	10	10	9	10	10	9	7	8	8	8	9	8	10	10	9	10	26.2131	26.2664	26.2895	26.4299	26.2987	26.2765	26.2739	26.5956
	0.201179	-0.0554994	E9Q9P4;F7BHL0;J3QP84;F6V0P5;F6XW53;F6ZSN2;A0A286YCW3;E3VRZ4;E3VRY6;A0A286YCI9;F6WSZ3;A0A286YCF5;J3QN27;J3QMT8;A0A286YDU9;A0A286YCQ2;A0A286YDR7;A0A286YE30;A0A286YD59;A0A286YDC1;A0A286YCZ9;A0A087WQ41;A0A286YCP1;E3VRY9;A0A286YD35;A0A087WRS4;A0A087WQN5;A0A286YDM6;Q08460-5;Q08460-3;Q08460-2;Q08460;Q08460-4;A0A1D5RMA3;A0A286YDB5;A0A087WQE1	E9Q9P4;F7BHL0;J3QP84;F6V0P5;F6XW53;F6ZSN2;A0A286YCW3;E3VRZ4;E3VRY6;A0A286YCI9;F6WSZ3;A0A286YCF5;J3QN27;J3QMT8;A0A286YDU9;A0A286YCQ2;A0A286YDR7;A0A286YE30;A0A286YD59;A0A286YDC1;A0A286YCZ9;A0A087WQ41;A0A286YCP1;E3VRY9;A0A286YD35;A0A087WRS4;A0A087WQN5;A0A286YDM6;Q08460-5;Q08460-3;Q08460-2;Q08460;Q08460-4;A0A1D5RMA3;A0A286YDB5;A0A087WQE1	Calcium-activated potassium channel subunit alpha-1	Kcnma1	2	2	2	3.1	3.1	3.1	118.43	0	8.3544	39371000	9	1	1	1	1	1	1	1	2	1	1	1	1	1	1	1	1	1	1	1	2	1	1	1	1	21.8943	22.0405	21.841	22.1419	21.8388	21.9615	21.8243	22.2166
	0.45407	-0.168309	E9QAN4;G3UW47;Q6TA13;E9Q9G6;A0A087WQE8;P33173;Q60575-2;Q60575;A2AH75;Q60575-3;F6XNB6	E9QAN4;G3UW47;Q6TA13;E9Q9G6;A0A087WQE8;P33173;Q60575-2;Q60575	Kinesin-like protein;Kinesin-like protein KIF1A;Kinesin-like protein KIF1B	Kif1a;Kif1b	6	6	6	4.6	4.6	4.6	190.97	0	20.671	33158000	5	4	2	3	2	3	2	3	3	3	4	3	2	4	2	3	2	3	2	3	3	3	4	3	2	21.5015	21.7924	21.628	21.5784	22.0484	21.8	20.6324	21.5648
	0.0843586	0.0361303	A0A087WR97;Q921F2;A0A087WRZ5;Q8R0B4;Q8BLD4;Q6VYI5;Q6VYI4;A0A087WSE4;A0A087WQA5;A0A087WS17;A0A087WP57;A0A087WQX8;A0A087WNY6;A0A087WS74;A0A087WRP4;H3BJV1;A0A087WSH7	A0A087WR97;Q921F2;A0A087WRZ5;Q8R0B4;Q8BLD4;Q6VYI5;Q6VYI4;A0A087WSE4;A0A087WQA5	TAR DNA-binding protein 43	Tardbp	4	4	4	27.6	27.6	27.6	26.715	0	41.383	236480000	39	2	3	2	4	4	3	3	4	3	4	4	3	2	3	2	4	4	3	3	4	3	4	4	3	24.7396	24.273	24.6275	24.5672	24.5678	24.3968	24.572	24.4029
	0.202063	0.153476	A0A087WS96;Q8BG73	A0A087WS96;Q8BG73	SH3 domain-binding glutamic acid-rich-like protein;SH3 domain-binding glutamic acid-rich-like protein 2	Sh3bgrl2	1	1	1	10	10	10	13.545	0	5.227	35293000	27	1	1	1	1	1	1	1	1	1	1	1	1	1	1	1	1	1	1	1	1	1	1	1	1	21.7808	21.9809	21.4724	21.8384	21.8497	21.0856	21.8732	21.8729
	0.0482633	0.0278397	D3Z0U5;D6RGM7;D3Z4J2;A0A0G2JFY0;A0A0A0MQ80;Q9D3R6-3;Q9D3R6;Q3UMC0	D3Z0U5;D6RGM7;D3Z4J2;A0A0G2JFY0;A0A0A0MQ80;Q9D3R6-3;Q9D3R6;Q3UMC0	Katanin p60 ATPase-containing subunit A-like 2;Spermatogenesis-associated protein 5	Katnal2;Spata5	1	1	1	4.3	4.3	4.3	31.2	0	3.6868	86552000	7	1	1	1	1	1	1	1	1	1	1	1	1	1	1	1	1	1	1	1	1	1	1	1	1	23.211	22.7986	23.2423	22.7877	23.2338	23.1469	22.9179	23.3512
	0.426689	0.0889994	A0A0A0MQA5;P68368;A0A087WQS4;A0A087WRB4;A0A087WSB0;A0A087WSL5;Q3UX10;A0A087WS35	A0A0A0MQA5;P68368	Tubulin alpha-4A chain	Tuba4a	26	9	7	71.1	31.9	26.2	52.793	0	245.48	9938800000	654	9	9	9	9	9	9	9	9	9	8	9	9	7	7	7	7	7	7	7	7	7	6	7	7	29.8724	29.8487	29.8361	29.8603	29.8432	29.5868	29.8973	29.9411
	0.215981	0.0773335	A0A0A0MQF1;F6QYT9;A2CG49-9;A2CG49-8;A2CG49-2;A2CG49;A2CG49-7;D3Z560;B1B1A7;A2CG49-10;A2CG49-5	A0A0A0MQF1;F6QYT9;A2CG49-9;A2CG49-8;A2CG49-2;A2CG49;A2CG49-7;D3Z560;B1B1A7;A2CG49-10;A2CG49-5	Kalirin	Kalrn	6	4	4	4.6	3.5	3.5	218.71	0	18.7	24742000	11	2	3	2	3	2	3	3	3	3	1	3	3	2	3	2	3	2	3	3	3	3	1	3	3	21.2775	21.0577	21.4241	20.9976	21.2463	21.2834	21.5113	21.3636
	0.148469	-0.0424716	A0A0A0MQF6;P16858;A0A1D5RLD8;S4R1W1;S4R257;S4R1W8;V9GX06;A0A0R4J0X7;S4R2G5;Q64467;S4R1N5;V9GXA7	A0A0A0MQF6;P16858;A0A1D5RLD8;S4R1W1;S4R257	Glyceraldehyde-3-phosphate dehydrogenase	Gapdh;Gm3839	19	19	19	70.2	70.2	70.2	38.653	0	323.31	32491000000	2116	16	17	16	17	18	19	16	17	17	18	18	17	16	17	16	17	18	19	16	17	17	18	18	17	31.3197	31.5738	31.3716	31.5883	31.3353	31.4688	31.4881	31.3731
	0.250933	0.0612011	A0A0A0MQM0;P63242;J3QPS8;Q8BGY2	A0A0A0MQM0;P63242;J3QPS8	Eukaryotic translation initiation factor 5A;Eukaryotic translation initiation factor 5A-1	Eif5a	8	8	8	64.4	64.4	64.4	16.302	0	57.212	616000000	130	6	5	6	6	6	5	5	5	6	6	7	6	6	5	6	6	6	5	5	5	6	6	7	6	26.0815	25.9045	25.9762	25.783	25.9288	26.0667	25.6424	26.1658
	1.9022	-0.255275	A0A0A6YVS6;A0A2R8VHH2;J3QQ18;F6SEU4;A0A0J9YUM2;A0A2R8VH83;A0A140T8K9;A0A0J9YVH8;A0A0J9YUZ5;A0A0J9YUY7;A0A0J9YUZ2	A0A0A6YVS6;A0A2R8VHH2;J3QQ18;F6SEU4;A0A0J9YUM2;A0A2R8VH83;A0A140T8K9;A0A0J9YVH8	Ras/Rap GTPase-activating protein SynGAP	Syngap1	29	29	29	36.6	36.6	36.6	141.78	0	248.48	833650000	246	24	22	20	24	23	20	22	22	22	22	21	21	24	22	20	24	23	20	22	22	22	22	21	21	26.3603	26.2935	26.4311	26.5309	26.6444	26.6753	26.1946	26.3038
	0.654884	-0.0809809	Q80XD3;A0A0A6YW36;O54829;Q45FE1;Q45FE2	Q80XD3;A0A0A6YW36;O54829;Q45FE1;Q45FE2	Regulator of G-protein signaling 7	Rgs7	9	9	7	30.4	30.4	25.3	55.014	0	67.473	294700000	73	8	6	8	9	8	7	8	8	8	7	6	8	6	4	6	7	6	5	6	6	6	5	4	6	24.7005	24.6849	24.8504	24.7907	24.8341	24.8539	24.8854	24.7558
	0.519213	-0.204566	A0A0A6YWH4;A0A0A6YWF5;A0A0A6YX60;Q9DCP2	A0A0A6YWH4;A0A0A6YWF5;A0A0A6YX60;Q9DCP2	Sodium-coupled neutral amino acid transporter 3	Slc38a3	1	1	1	17.2	17.2	17.2	10.712	0	8.2467	51853000	1	1	1	1	1	1	1	1	1	1	1	1	1	1	1	1	1	1	1	1	1	1	1	1	1	22.0102	22.4182	22.1973	22.5869	22.1667	22.4858	22.3397	22.502
	0.761653	0.170514	A0A0A6YWG7;E9QNQ4;Q8CHG7;Q5NCJ4;Q5NCJ5;Q5NCJ0;B2RUJ6;Q5NCJ1	A0A0A6YWG7;E9QNQ4;Q8CHG7	Rap guanine nucleotide exchange factor 2	Rapgef2	12	12	12	13.9	13.9	13.9	184.11	0	25.463	120400000	7	8	6	6	6	8	5	4	6	8	7	6	4	8	6	6	6	8	5	4	6	8	7	6	4	23.9163	23.7523	23.6408	23.7287	23.5284	23.5407	23.4576	23.6039
	0.0760838	-0.0400823	A0A0A6YX33;A0A0A6YWI6;A0A0A6YX71;Q6PGN3-6;Q6PGN3-5;Q6PGN3-4;Q6PGN3-2;Q6PGN3;Q6PGN3-3	A0A0A6YX33;A0A0A6YWI6;A0A0A6YX71;Q6PGN3-6;Q6PGN3-5;Q6PGN3-4;Q6PGN3-2;Q6PGN3;Q6PGN3-3	Serine/threonine-protein kinase DCLK2	Dclk2	6	6	5	13.4	13.4	10.5	64.926	0	18.189	53912000	6	5	4	4	5	3	3	3	3	4	6	4	4	4	3	3	4	2	3	3	2	3	5	4	3	22.5219	22.3167	22.4487	22.5664	22.1289	22.7122	21.9768	22.0501
	2.09001	0.307807	A0A0A6YX18;Q8BVE3;A0A0A6YWP6;A0A0A6YVU0;A0A0A6YW86	A0A0A6YX18;Q8BVE3;A0A0A6YWP6	V-type proton ATPase subunit H	Atp6v1h	16	16	16	40.2	40.2	40.2	54.108	0	183.09	1511200000	241	14	13	14	12	11	12	15	14	14	14	13	12	14	13	14	12	11	12	15	14	14	14	13	12	27.389	27.2631	27.471	27.1021	27.049	27.0486	27.1302	27.2365
	0.373869	-0.131415	A0A0A6YX26;P62900	A0A0A6YX26;P62900	60S ribosomal protein L31	Rpl31	1	1	1	10.9	10.9	10.9	14.996	0	17.37	110350000	23	1	1	1	1	1	1	1	1	1	1	1	1	1	1	1	1	1	1	1	1	1	1	1	1	23.5112	23.3322	23.2219	23.452	23.2967	23.7109	23.4265	23.5138
	0.147838	-0.0423743	A0A0A6YX73;Q8K1M3;P12367;A0A0A6YY28	A0A0A6YX73;Q8K1M3;P12367	cAMP-dependent protein kinase type II-alpha regulatory subunit	Prkar2a	10	10	9	38.4	38.4	34.5	43.165	0	76.911	376920000	77	9	9	9	8	10	9	9	8	9	10	9	10	8	8	8	7	9	8	8	7	8	9	8	9	25.2448	24.9657	24.9592	25.0931	25.1886	25.0152	25.3026	25.1602
	0.486525	0.247113	D3YWU6;D3Z4Q4;D3Z2X0;D3YUG9;V9GXY8;A0A0A6YXR4;P47199;A0A0G2JFU5	D3YWU6;D3Z4Q4;D3Z2X0;D3YUG9;V9GXY8;A0A0A6YXR4;P47199	Quinone oxidoreductase	Cryz	3	3	3	44.3	44.3	44.3	10.494	0	3.9333	81715000	6	3	3	3	2	3	3	2	3	3	3	3	3	3	3	3	2	3	3	2	3	3	3	3	3	23.4924	22.8994	22.9842	23.1175	22.7861	22.731	23.1279	23.1333
	0.348835	-0.0637499	A0A0A6YY91	A0A0A6YY91		Ncam1	19	19	2	33	33	4.4	116.26	0	323.31	2162400000	393	16	15	16	18	16	15	16	17	15	17	16	18	2	1	2	2	2	1	1	2	1	1	1	2	27.5765	27.5711	27.6666	27.7711	27.6976	27.5367	27.8326	27.7835
	0.246662	-0.0617981	A0A0G2JDN7;E9PZ43;P27546-4;A0A0G2JFT4;A0A140T8T5;A0A0G2JFH2;A0A0G2JFK3;A0A0G2JDY5;A0A0G2JDU1	A0A0G2JDN7;E9PZ43;P27546-4	Microtubule-associated protein;Microtubule-associated protein 4	Map4	13	13	9	23.3	23.3	16.6	94.517	0	68.208	313540000	133	10	10	11	11	10	9	10	10	10	12	10	11	7	7	8	8	8	7	6	7	7	8	6	8	24.9651	25.0093	24.9935	24.8643	25.0916	25.1974	24.8975	24.9792
	0.350537	0.334401	A0A0G2JDX4;A0A0G2JEZ7;Q9D1X8;Q922J6	A0A0G2JDX4;A0A0G2JEZ7;Q9D1X8;Q922J6	Tetraspanin;Tetraspanin-2	Tspan2	2	2	2	19.5	19.5	19.5	9.5218	0	46.593	95526000	27	2	2	2	2	2	2	2	2	2	2	2	2	2	2	2	2	2	2	2	2	2	2	2	2	23.5322	23.4591	22.9002	23.3905	23.2116	22.2862	23.8514	22.9515
	0.647884	-0.289925	A0A0G2JEU6;A0A0G2JFA1;S4R1K5;B1AXI2;A0A0G2JE35;A0A0G2JEH1;B1AXI4;B1AXI6;E0CYU0;E0CX56;E9Q3I3;E9PYK8;Q5DU57-2;Q7TNR9;Q3UTH8-2;Q3UTH8-3;Q3UTH8-4;Q3UTH8;Q5DU57	A0A0G2JEU6;A0A0G2JFA1;S4R1K5;B1AXI2;A0A0G2JE35;A0A0G2JEH1;B1AXI4;B1AXI6;E0CYU0;E0CX56;E9Q3I3;E9PYK8;Q5DU57-2;Q7TNR9;Q3UTH8-2;Q3UTH8-3;Q3UTH8-4;Q3UTH8;Q5DU57	Spermatogenesis-associated protein 13;Rho guanine nucleotide exchange factor 4;Rho guanine nucleotide exchange factor 9	Arhgef9;Spata13;Arhgef4	1	1	1	4.2	4.2	4.2	27.986	0	3.7435	12598000	7	1	1	1	1	1	1	1	1	1	1	1	1	1	1	1	1	1	1	1	1	1	1	1	1	20.0159	20.5937	20.0399	20.6481	20.4638	20.4074	20.2347	20.3983
	0.26307	-0.0721792	A0A0G2JEG8;Q7TQF7	A0A0G2JEG8;Q7TQF7	Amphiphysin	Amph	17	17	17	31.4	31.4	31.4	75.339	0	323.31	1517700000	416	14	16	15	14	16	15	13	15	15	16	15	16	14	16	15	14	16	15	13	15	15	16	15	16	27.2466	27.137	27.0835	27.4164	27.0849	27.1824	27.1786	27.0083
	0.114474	-0.0316118	A0A0G2JGB7;Q9JIA1;A0A0G2JGE8;A0A0G2JFT0	A0A0G2JGB7;Q9JIA1;A0A0G2JGE8;A0A0G2JFT0	Leucine-rich glioma-inactivated protein 1	Lgi1	8	8	8	19.7	19.7	19.7	60.998	0	42.263	295180000	82	7	8	8	7	6	6	8	8	7	6	7	7	7	8	8	7	6	6	8	8	7	6	7	7	24.845	24.8888	25.044	24.8233	25.1002	24.9492	24.8312	24.6918
	0.991292	-0.228552	A0A0G2JGQ6;Q9JLM8;Q80VB6;Q9JLM8-2;A0A0G2JE54;Q8CCN4;A0A0G2JGH1;Q1EDH1;H7BX36;A0A0G2JEN4;A0A0G2JGR9	A0A0G2JGQ6;Q9JLM8;Q80VB6;Q9JLM8-2	Serine/threonine-protein kinase DCLK1	Dclk1	16	16	15	31.1	31.1	29.6	82.104	0	81.389	583020000	93	15	16	15	14	15	14	14	14	16	13	13	13	14	15	14	13	14	13	13	13	15	13	13	12	25.6851	25.704	25.8915	25.8336	26.1295	26.0033	25.8283	25.8998
	0.0158064	-0.00169182	A0A0G2JGX4;Q6PIC6;Q8VCE0;Q9WV27;Q9Z1W8;Q91WH7;E9QNX7;Q64436	A0A0G2JGX4;Q6PIC6;Q8VCE0	Sodium/potassium-transporting ATPase subunit alpha-3	Atp1a3	46	46	29	54.5	54.5	36	112.99	0	323.31	34457000000	5782	43	43	44	41	41	42	42	45	43	42	42	43	27	27	28	25	25	26	26	28	26	26	26	27	31.4281	31.3739	31.3058	31.3762	31.3665	31.3703	31.5873	31.4816
	0.484772	0.0634193	A0A0J9YTY0;A0A0J9YUL3;Q8C1B7-3;Q8C1B7-2;Q8C1B7;A0A0J9YUV6;A0A0J9YVA6	A0A0J9YTY0;A0A0J9YUL3;Q8C1B7-3;Q8C1B7-2;Q8C1B7	Septin-11	2018-09-11	14	11	7	44	36	25.2	48.978	0	130.57	598010000	157	7	7	6	6	9	6	8	7	7	11	7	7	4	4	3	3	6	4	5	4	4	7	4	4	25.9328	25.8173	25.9606	25.846	25.7747	25.8997	25.9776	25.6929
	0.319446	0.0528838	A0A0J9YU62;O88712-2;O88712;A0A0J9YUM4;O88712-3;A0A0J9YTW3;A0A0J9YUR5;A0A0J9YVI3;A0A0J9YU66;E9Q0T4;E9PWQ9;Q91YZ2;P56546;P56546-2	A0A0J9YU62;O88712-2;O88712;A0A0J9YUM4;O88712-3;A0A0J9YTW3	C-terminal-binding protein 1	Ctbp1	8	8	8	34	34	34	46.527	0	219.87	467780000	193	8	7	8	8	8	8	7	8	8	8	8	8	8	7	8	8	8	8	7	8	8	8	8	8	25.4798	25.5775	25.5385	25.5059	25.3615	25.5698	25.5151	25.6965
	1.06336	-0.208619	A0A0J9YUD8;A0A0J9YUZ4;P63158;D3YZ18;D3YVC6;A0A1B0GQX9;P30681	A0A0J9YUD8;A0A0J9YUZ4;P63158	High mobility group protein B1	Hmgb1	7	7	7	44.4	44.4	44.4	19.774	0	51.561	547120000	126	7	6	6	7	7	7	6	6	6	7	7	7	7	6	6	7	7	7	6	6	6	7	7	7	25.6903	25.4282	25.6399	25.71	25.8095	25.8648	25.5178	25.2965
	0.114493	0.0117455	A0A0J9YUN4;A0A0J9YUE9;P39053-3;F6W8Z8;F6RRH9;D6RH60;F6TH70;G3UY64	A0A0J9YUN4;A0A0J9YUE9;P39053-3	Dynamin-1	Dnm1	46	46	2	65	65	3.4	97.294	0	323.31	10116000000	1871	43	42	41	43	42	41	42	40	40	42	43	40	2	2	2	2	2	2	2	2	2	1	2	2	29.8748	29.8271	29.8185	29.8093	29.8925	29.7835	29.8203	29.8449
	0.242452	0.103413	A0A0J9YUS5;E9PVC6;E9Q9E1;E9PVC5;Q6NZJ6-2;Q6NZJ6;A0A0J9YVC1;A0A0J9YUC1;E9Q770	A0A0J9YUS5;E9PVC6;E9Q9E1;E9PVC5;Q6NZJ6-2;Q6NZJ6;A0A0J9YVC1;A0A0J9YUC1;E9Q770	Eukaryotic translation initiation factor 4 gamma 1	Eif4g1	7	7	4	6.8	6.8	4.4	145.31	0	14.385	58318000	3	5	4	5	5	7	5	4	5	5	5	5	5	3	1	3	3	4	2	2	3	2	3	4	3	22.3885	22.7136	22.7171	22.3216	22.7508	22.4366	22.6083	22.3472
	2.19634	0.220334	A0A0J9YVD2;B9EKR1;B2RXS8	A0A0J9YVD2;B9EKR1;B2RXS8	Receptor-type tyrosine-protein phosphatase zeta;Protein-tyrosine-phosphatase	Ptprz1	9	9	9	7.2	7.2	7.2	174.99	0	89.143	494830000	197	7	8	7	8	8	8	8	8	7	8	8	8	7	8	7	8	8	8	8	8	7	8	8	8	25.7416	25.6221	25.6827	25.4814	25.4138	25.4901	25.5783	25.5449
	0.316832	0.338739	A0A0J9YVF0;Q14BI2	A0A0J9YVF0;Q14BI2	Metabotropic glutamate receptor 2	Grm2	5	4	4	14.3	11.8	11.8	65.785	0	13.303	51048000	2	3	4	3	3	4	2	2	3	3	2	3	3	3	4	3	3	4	2	2	3	3	2	3	3	23.088	22.1283	21.8425	22.1596	22.3063	21.5767	22.1211	22.5988
	0.303474	0.0732644	A0A0M3HEP7;P70704-3;P70704-2;P70704;A0A0J9YV34;F6Q8P7;E9Q4J5;Q3U9N5;P98200	A0A0M3HEP7;P70704-3;P70704-2;P70704	Phospholipid-transporting ATPase IA	Atp8a1	17	17	17	20.3	20.3	20.3	131.51	0	93.292	358170000	141	12	12	16	14	12	12	11	16	14	14	13	15	12	12	16	14	12	12	11	16	14	14	13	15	25.1553	25.4141	25.1534	25.0945	25.1548	25.2537	25.1406	25.2465
	1.70443	-0.439573	J3QMN4;A0A0U1RPV8;A0A0U1RQA4;J3QMQ8;A0A0M3HEQ0;Q9JLT4-2;Q9JLT4-4;Q9JLT4;A0A0M3HEP9;D3Z0K8;Q9JLT4-3;Q9D8I4;A0A0U1RPS1;A0A0U1RPC6	J3QMN4;A0A0U1RPV8;A0A0U1RQA4;J3QMQ8;A0A0M3HEQ0;Q9JLT4-2;Q9JLT4-4;Q9JLT4;A0A0M3HEP9;D3Z0K8;Q9JLT4-3;Q9D8I4;A0A0U1RPS1;A0A0U1RPC6	Thioredoxin reductase 2, mitochondrial	Txnrd2	4	3	3	16.9	13.8	13.8	53.051	0	18.571	66769000	13	3	3	1	3	2	2	1	3	2	3	3	2	3	3	1	3	2	2	1	3	2	3	3	2	22.3966	22.2339	22.3016	22.6455	22.9641	22.6413	22.6613	22.7954
	0.322032	-0.175613	A0A0N4SUH8;Q9QZ23;D3Z285	A0A0N4SUH8;Q9QZ23;D3Z285	NFU1 iron-sulfur cluster scaffold homolog, mitochondrial	Nfu1	5	5	5	26.2	26.2	26.2	28.654	0	26.859	58332000	15	2	2	2	3	3	3	2	4	4	4	2	3	2	2	2	3	3	3	2	4	4	4	2	3	22.1845	22.4447	22.7118	22.3669	22.9283	22.5726	22.6366	22.6825
	1.37652	0.316041	A0A0N4SUQ1;A0A0N4SUN8;A0A0N4SWH2;A0A0N4SV32;Q3UMP4;Q9CY58-4;Q9CY58-3;Q9CY58-2;Q9CY58	A0A0N4SUQ1;A0A0N4SUN8;A0A0N4SWH2;A0A0N4SV32;Q3UMP4;Q9CY58-4;Q9CY58-3;Q9CY58-2;Q9CY58	Plasminogen activator inhibitor 1 RNA-binding protein	Serbp1	2	2	2	21.1	21.1	21.1	16.078	0	7.3127	78000000	30	1	2	2	2	2	2	2	1	2	1	2	2	1	2	2	2	2	2	2	1	2	1	2	2	23.0127	22.8519	23.0553	22.8313	22.5547	22.5858	22.9216	22.8351
	2.43939	-0.460409	A0A0N4SV66;C0HKE9;C0HKE8;C0HKE7;C0HKE6;C0HKE5;C0HKE4;C0HKE3;C0HKE2;C0HKE1;Q8CGP6;Q8R1M2;Q8CGP7;Q8CGP5;Q8BFU2;Q8CGP4;P27661	A0A0N4SV66;C0HKE9;C0HKE8;C0HKE7;C0HKE6;C0HKE5;C0HKE4;C0HKE3;C0HKE2;C0HKE1;Q8CGP6;Q8R1M2;Q8CGP7;Q8CGP5;Q8BFU2;Q8CGP4;P27661	Histone H2A type 1-H;Histone H2A.J;Histone H2A type 1-K;Histone H2A type 1-F;Histone H2A type 3;Histone H2A;Histone H2AX	Hist1h2ah;H2afj;Hist1h2ak;Hist1h2af;Hist3h2a;Hist1h2aa;H2afx	4	4	1	50.8	50.8	23	13.66	0	123.7	1517100000	257	2	4	3	3	3	2	2	3	3	3	3	3	0	1	0	0	0	0	0	0	0	0	0	0	27.2092	27.0157	27.1573	27.5736	27.5121	27.6778	27.2626	27.1518
	0.173377	0.103731	A0A0N4SVF0;Q6ZWY8	A0A0N4SVF0;Q6ZWY8	Thymosin beta-10	Tmsb10	1	1	1	20.9	20.9	20.9	7.2793	0	21.739	457750000	51	1	1	1	1	1	1	1	1	1	1	1	1	1	1	1	1	1	1	1	1	1	1	1	1	25.3717	25.2598	25.0679	25.5449	24.9515	24.8917	25.6105	25.5051
	1.01995	-0.157187	A0A0N4SVT3;A0A0N4SW28;Q9DAS9	A0A0N4SVT3;A0A0N4SW28;Q9DAS9	Guanine nucleotide-binding protein G(I)/G(S)/G(O) subunit gamma-12	Gng12	2	2	2	46.2	46.2	46.2	7.1971	0	42.409	215990000	54	2	2	2	2	2	2	2	2	2	1	2	2	2	2	2	2	2	2	2	2	2	1	2	2	24.3885	24.4806	24.2477	24.5546	24.4786	24.5552	24.5563	24.3672
	2.25395	0.0998491	A0A0R3P9C8;Q9DC69	A0A0R3P9C8;Q9DC69	NADH dehydrogenase [ubiquinone] 1 alpha subcomplex subunit 9, mitochondrial	Ndufa9	18	18	18	58.4	58.4	58.4	42.121	0	154.71	1234100000	206	15	16	16	16	15	15	14	15	14	16	16	14	15	16	16	16	15	15	14	15	14	16	16	14	27.0217	26.9806	26.9657	26.9045	26.8832	26.8806	26.8485	26.7099
	0.392282	-0.362644	A0A0R4IZW8;O88456;A0A0R4J1C2	A0A0R4IZW8;O88456	Calpain small subunit 1	Capns1	3	3	3	23.5	23.5	23.5	28.406	0	13.533	64643000	17	2	2	3	3	3	2	2	3	3	3	3	3	2	2	3	3	3	2	2	3	3	3	3	3	21.9558	22.4238	22.5195	22.8384	21.9891	23.1594	22.665	22.679
	1.6904	0.164274	A0A0R4IZX5;P55066	A0A0R4IZX5;P55066	Neurocan core protein	Ncan	14	14	14	13.2	13.2	13.2	137.17	0	64.954	251870000	60	13	12	12	11	10	10	10	10	9	12	7	8	13	12	12	11	10	10	10	10	9	12	7	8	24.7828	24.7731	24.8497	24.6024	24.7115	24.5989	24.5432	24.732
	0.346681	-0.142784	A0A0R4IZY0;Q8C1A5	A0A0R4IZY0;Q8C1A5	Thimet oligopeptidase	Thop1	9	9	9	17.5	17.5	17.5	78.026	0	29.952	177380000	33	8	7	6	6	8	5	8	5	8	8	7	5	8	7	6	6	8	5	8	5	8	8	7	5	24.2256	24.1045	24.2174	24.6468	24.0912	24.2379	24.0535	23.9435
	0.143117	0.0762386	A0A0R4J023;Q9JLZ3;F6RT60;F6R307;A0A0R4J1L8;Q9JLZ3-3;E9Q6L3;E9QMT1;Q9JLZ3-2	A0A0R4J023;Q9JLZ3;F6RT60;F6R307	Methylglutaconyl-CoA hydratase, mitochondrial	Auh	6	6	6	24.2	24.2	24.2	33.338	0	40.218	230990000	47	5	6	6	4	5	6	5	6	6	4	6	5	5	6	6	4	5	6	5	6	6	4	6	5	24.403	24.5272	24.3884	24.5495	23.9781	24.5623	24.5318	24.7088
	0.148333	0.031339	A0A0R4J036;P08553;D3YZ35	A0A0R4J036;P08553;D3YZ35	Neurofilament medium polypeptide	Nefm	17	14	14	27.9	24.5	24.5	95.94	0	227.33	1635800000	361	12	13	13	13	13	12	14	13	13	13	14	14	12	13	13	13	13	12	14	13	13	13	14	14	27.4591	27.2853	27.4568	27.2687	27.3864	27.4521	27.4633	27.3426
	0.260141	0.140464	D3YWI0;E9Q2H8;E9PYA3;A0A0R4J052;G5E8T9;Q99KB8-2;Q99KB8;D3YUX8	D3YWI0;E9Q2H8;E9PYA3;A0A0R4J052;G5E8T9;Q99KB8-2;Q99KB8	Hydroxyacylglutathione hydrolase, mitochondrial	Hagh	3	3	3	20.4	20.4	20.4	18.201	0	7.3239	84373000	29	3	3	3	3	3	3	3	3	3	3	3	3	3	3	3	3	3	3	3	3	3	3	3	3	23.0253	23.0558	23.1817	22.5759	23.3017	22.9638	23.0112	23.3351
	0.083892	-0.0235519	A0A0R4J083;P51174	A0A0R4J083;P51174	Long-chain specific acyl-CoA dehydrogenase, mitochondrial	Acadl	8	8	8	25.1	25.1	25.1	47.896	0	49.799	252570000	86	8	7	7	6	7	7	7	7	8	6	6	8	8	7	7	6	7	7	7	7	8	6	6	8	24.5874	24.6173	24.6323	24.5724	24.8292	24.5062	24.5924	24.8178
	0.746147	0.201968	A0A0R4J087;Q8BJI1;A0A0R4J252;E9Q4S9	A0A0R4J087;Q8BJI1;A0A0R4J252	Sodium-dependent neutral amino acid transporter SLC6A17	Slc6a17	7	7	7	12	12	12	80.756	0	37.439	166910000	69	7	7	7	7	7	6	6	6	7	7	7	7	7	7	7	7	7	6	6	6	7	7	7	7	24.0667	24.3261	24.091	24.1395	23.8311	23.9074	24.0955	23.912
	0.181119	-0.0574341	A0A0R4J094;Q3TC72	A0A0R4J094;Q3TC72	Fumarylacetoacetate hydrolase domain-containing protein 2A	Fahd2	7	7	7	42.2	42.2	42.2	34.676	0	48.261	298610000	83	7	7	7	7	6	5	6	7	6	6	7	5	7	7	7	7	6	5	6	7	6	6	7	5	24.9995	24.6515	24.7386	24.9108	24.9177	24.7335	24.9292	24.8662
	0.299328	-0.14787	A0A0R4J0B4;Q99KK2;Q99KK2-2;A0A0N4SW65;A0A0N4SWC3	A0A0R4J0B4;Q99KK2;Q99KK2-2	N-acylneuraminate cytidylyltransferase	Cmas	3	3	3	9	9	9	48.029	0	6.9853	29817000	14	2	2	2	1	3	3	2	3	2	2	2	3	2	2	2	1	3	3	2	3	2	2	2	3	21.3714	21.4904	21.3989	21.1734	21.7651	21.7658	21.2791	21.8022
	0.0645194	-0.0388622	J3QQ44;A0A0R4J0B8;Q62421;J3QK75	J3QQ44;A0A0R4J0B8;Q62421;J3QK75	Endophilin-A3	Sh3gl3	4	4	4	19.9	19.9	19.9	35.098	0	19.71	37165000	13	2	4	3	2	4	1	3	3	2	4	3	3	2	4	3	2	4	1	3	3	2	4	3	3	21.5553	21.5847	22.1776	21.8556	21.705	21.8736	21.8157	20.9352
	0.027445	0.01441	A0A0R4J0F6;Q99KY4;Q99KY4-2;A0A0G2JFZ0;F6SLK1	A0A0R4J0F6;Q99KY4;Q99KY4-2	Cyclin-G-associated kinase	Gak	3	3	3	2.7	2.7	2.7	143.67	0	5.4941	121540000	13	3	3	2	2	3	2	2	3	3	1	3	3	3	3	2	2	3	2	2	3	3	1	3	3	23.4477	23.7177	23.7453	23.3318	23.8205	23.7152	23.4434	23.8241
	0.0612168	-0.0451298	A0A0R4J0I9;Q91ZX7;Q3U5J2	A0A0R4J0I9;Q91ZX7	Prolow-density lipoprotein receptor-related protein 1;Low-density lipoprotein receptor-related protein 1 85 kDa subunit;Low-density lipoprotein receptor-related protein 1 515 kDa subunit;Low-density lipoprotein receptor-related protein 1 intracellular domain	Lrp1	12	12	12	3.5	3.5	3.5	504.77	0	33.522	101760000	16	8	8	8	7	7	8	7	6	8	7	8	9	8	8	8	7	7	8	7	6	8	7	8	9	22.8297	23.6394	23.4727	23.3473	23.4805	23.2494	23.265	23.2359
	1.83086	-0.376277	A0A0R4J0Q5;P21619;P21619-2	A0A0R4J0Q5;P21619;P21619-2	Lamin-B2	Lmnb2	7	7	7	14.1	14.1	14.1	69.084	0	19.386	67036000	17	4	4	5	6	6	6	4	5	5	5	5	5	4	4	5	6	6	6	4	5	5	5	5	5	22.4712	22.3971	22.5163	22.9195	22.6683	22.9256	22.8555	23.1905
	0.401706	0.195975	A0A0R4J0Z3;P55088-2;P55088;P55088-3	A0A0R4J0Z3;P55088-2;P55088;P55088-3	Aquaporin-4	Aqp4	5	5	5	17	17	17	34.535	0	27.62	649030000	49	5	5	5	5	3	3	4	5	4	4	5	5	5	5	5	5	3	3	4	5	4	4	5	5	25.9668	25.9	25.7005	25.57	25.384	26.0253	26.6151	26.3988
	2.12395	-0.604907	G3UYZ1;A0A0R4J117;Q8R366;A0A0A6YVX9;D3Z4Q8;A0A0A6YWK7	G3UYZ1;A0A0R4J117;Q8R366	Immunoglobulin superfamily member 8	Igsf8	8	8	8	32.7	32.7	32.7	58.131	0	76.31	440920000	113	5	6	4	5	6	5	6	5	4	8	6	6	5	6	4	5	6	5	6	5	4	8	6	6	25.0814	25.1105	24.9512	25.5981	25.8658	25.4939	25.3688	25.2375
	0.961698	0.286313	A0A0R4J1F4;A2AGR0;A2AGQ6;E9QN47;Q80U28-3;Q80U28-15;Q80U28;Q80U28-14;A2AGR1;A2AGQ3;A2AGQ8;A2AGQ4;Q80U28-2;A2AGQ2;A2AGQ7;A2AGQ9;A2AGQ5;Q80U28-11;Q80U28-8;Q80U28-7;Q80U28-6;Q80U28-5;Q80U28-4;A6PWP8;Q80U28-13;Q80U28-12;Q80U28-10;Q80U28-9;A6PWP7	A0A0R4J1F4;A2AGR0;A2AGQ6;E9QN47;Q80U28-3;Q80U28-15;Q80U28;Q80U28-14;A2AGR1;A2AGQ3;A2AGQ8;A2AGQ4;Q80U28-2;A2AGQ2;A2AGQ7;A2AGQ9;A2AGQ5;Q80U28-11;Q80U28-8;Q80U28-7;Q80U28-6;Q80U28-5;Q80U28-4;A6PWP8;Q80U28-13;Q80U28-12;Q80U28-10;Q80U28-9	MAP kinase-activating death domain protein	Madd	10	10	10	9.8	9.8	9.8	173.2	0	25.845	123210000	22	5	5	6	6	8	6	4	8	6	5	6	7	5	5	6	6	8	6	4	8	6	5	6	7	23.9105	23.724	24.0085	23.5762	23.7967	23.4112	23.6362	23.4278
	1.00085	-0.286608	Q3TMU8;A0A0R4J1N0;O35098;O35098-2;D3Z360	Q3TMU8;A0A0R4J1N0;O35098;O35098-2	Dihydropyrimidinase-related protein 4	Dpysl4	17	16	16	55.9	53.1	53.1	61.927	0	144.26	908280000	178	14	11	10	14	12	11	13	11	13	14	13	13	14	11	10	14	12	11	13	11	13	14	13	13	26.1665	26.0587	26.0405	26.3821	26.1493	26.5941	26.5208	26.2166
	0.331238	-0.214986	G3UZ48;G3UZI2;A0A0R4J259;G3V018;Q7TMK9-2;Q7TMK9;G3UXJ6;G3UWM1;G3UXU5;S4R1E9	G3UZ48;G3UZI2;A0A0R4J259;G3V018;Q7TMK9-2;Q7TMK9;G3UXJ6;G3UWM1	Heterogeneous nuclear ribonucleoprotein Q	Syncrip	8	4	4	22.8	14.4	14.4	52.062	0	17.014	66456000	11	1	2	2	2	2	2	3	3	2	3	1	2	1	2	2	2	2	2	3	3	2	3	1	2	22.7701	22.7895	22.2161	23.1866	22.5995	22.6346	22.7154	22.5418
	0.123101	-0.00753403	A0A0R4J275;Q7TMF3	A0A0R4J275;Q7TMF3	NADH dehydrogenase [ubiquinone] 1 alpha subcomplex subunit 12	Ndufa12	7	7	7	55	55	55	17.633	0	76.072	458060000	222	7	7	7	7	7	7	7	7	7	7	7	7	7	7	7	7	7	7	7	7	7	7	7	7	25.4673	25.4728	25.4154	25.4437	25.4495	25.4849	25.5153	25.4132
	1.90957	-0.201668	A0A0R4J2A6;S4R1H2;A0A0R4J2A8;S4R1Q0;S4R2Q2;S4R2I2;S4R2H2;Q8BIZ1-2;Q8BIZ1-4;S4R2H3;E9QPP6;S4R286;Q8BIZ1;S4R2H8;A0A0R4J2A2;Q8BIZ1-3;S4R2N9;A0A140T8U6;S4R2E3;Q8BIZ1-5;S4R235;K4DI73;S4R2K2;S4R1K4	A0A0R4J2A6;S4R1H2;A0A0R4J2A8;S4R1Q0;S4R2Q2;S4R2I2;S4R2H2;Q8BIZ1-2;Q8BIZ1-4;S4R2H3;E9QPP6;S4R286;Q8BIZ1;S4R2H8;A0A0R4J2A2;Q8BIZ1-3;S4R2N9;A0A140T8U6;S4R2E3;Q8BIZ1-5	Ankyrin repeat and sterile alpha motif domain-containing protein 1B	Anks1b	10	10	10	29.1	29.1	29.1	48.314	0	72.878	172470000	38	8	6	8	7	9	7	5	7	7	7	7	6	8	6	8	7	9	7	5	7	7	7	7	6	24.065	24.0616	24.123	24.3527	24.2078	24.294	24.0143	23.9976
	0.955443	0.300135	A0A0R4J2B2;Q6WVG3	A0A0R4J2B2;Q6WVG3	BTB/POZ domain-containing protein KCTD12	Kctd12	7	7	6	26.9	26.9	24.8	35.888	0	66.397	222210000	122	7	7	6	6	7	7	7	6	7	7	7	7	6	6	5	5	6	6	6	5	6	6	6	6	24.3891	24.7169	24.5723	24.4212	24.0434	24.3133	24.4927	24.7055
	1.15531	-1.21283	A0A0R4J2C2;P46097	A0A0R4J2C2;P46097	Synaptotagmin-2	Syt2	12	6	6	32	21.8	21.8	47.248	0	39.262	127690000	78	3	4	5	5	4	3	6	6	6	6	5	5	3	4	5	5	4	3	6	6	6	6	5	5	22.5427	22.9882	22.788	23.6273	23.4002	24.9298	23.7082	23.9713
	0.293326	-0.0287908	A0A0U1RNJ1;P19096	A0A0U1RNJ1;P19096	Fatty acid synthase;[Acyl-carrier-protein] S-acetyltransferase;[Acyl-carrier-protein] S-malonyltransferase;3-oxoacyl-[acyl-carrier-protein] synthase;3-oxoacyl-[acyl-carrier-protein] reductase;3-hydroxyacyl-[acyl-carrier-protein] dehydratase;Enoyl-[acyl-carrier-protein] reductase;Oleoyl-[acyl-carrier-protein] hydrolase	Fasn	43	43	43	29.5	29.5	29.5	272.22	0	273.43	1201800000	294	32	29	32	34	31	29	29	29	35	36	38	31	32	29	32	34	31	29	29	29	35	36	38	31	26.7873	26.8409	26.8254	26.8669	26.8971	26.7759	26.8259	26.892
	0.0163192	-0.00845718	A0A0U1RNT6;A0A0U1RNK6;Q3THS6;A0A0U1RQ95;A0A0U1RQB0;Q91X83	A0A0U1RNT6;A0A0U1RNK6;Q3THS6;A0A0U1RQ95	S-adenosylmethionine synthase isoform type-2	Mat2a	4	4	4	17.1	17.1	17.1	39.738	0	15.8	102190000	23	3	4	4	4	3	3	3	4	4	4	3	3	3	4	4	4	3	3	3	4	4	4	3	3	23.2074	23.1814	23.5201	23.1065	23.5609	23.2669	23.2678	23.3298
	0.174465	0.239458	A0A0U1RP13;Q8VDP6;A0A0U1RNI6;A0A0U1RPV3;A0A0U1RQ57;A0A0U1RP60;Q05BY1	A0A0U1RP13;Q8VDP6;A0A0U1RNI6;A0A0U1RPV3;A0A0U1RQ57	CDP-diacylglycerol--inositol 3-phosphatidyltransferase	Cdipt	4	4	4	24.3	24.3	24.3	20.292	0	10.137	80195000	9	2	2	1	3	3	2	4	3	3	3	3	2	2	2	1	3	3	2	4	3	3	3	3	2	22.8029	23.8634	22.934	23.3914	23.3269	22.1637	22.7991	22.6059
	1.22478	0.503396	A0A0U1RPI1;Q9Z239	A0A0U1RPI1;Q9Z239	Phospholemman	Fxyd1	1	1	1	17.9	17.9	17.9	7.6016	0	6.221	18173000	11	1	1	1	1	1	1	1	1	1	1	1	1	1	1	1	1	1	1	1	1	1	1	1	1	20.4879	19.9187	20.4812	19.855	19.7147	19.8079	20.3015	19.9926
	1.38802	-0.232195	A0A140LHL5;Q8VDQ8-2;Q8VDQ8;Q8VDQ8-4;Q8VDQ8-3	A0A140LHL5;Q8VDQ8-2;Q8VDQ8;Q8VDQ8-4;Q8VDQ8-3	NAD-dependent protein deacetylase sirtuin-2	Sirt2	17	17	17	63.5	63.5	63.5	39.425	0	203.77	1844900000	380	15	15	16	15	16	14	16	16	15	15	16	16	15	15	16	15	16	14	16	16	15	15	16	16	27.3296	27.4027	27.291	27.4352	27.6148	27.6699	27.4888	27.5
	0.286834	0.194918	A0A140LJB7;Q3MIA8;B1ATU4;G3UXW9;Q99LD4;Q99LD4-2	A0A140LJB7;Q3MIA8;B1ATU4;G3UXW9;Q99LD4;Q99LD4-2	COP9 signalosome complex subunit 1	Gps1	6	6	6	18.7	18.7	18.7	55.034	0	15.16	92150000	33	5	5	4	4	3	2	4	4	4	6	5	5	5	5	4	4	3	2	4	4	4	6	5	5	23.2227	23.6064	23.1181	23.0922	22.7363	23.534	23.1746	22.7822
	1.23561	0.163191	A0A140T8I9;E9Q3L2	A0A140T8I9;E9Q3L2		Pi4ka	19	19	19	12.6	12.6	12.6	231.35	0	61.429	145870000	46	15	13	13	13	9	10	11	10	11	12	9	13	15	13	13	13	9	10	11	10	11	12	9	13	23.8584	23.773	23.9202	23.6347	23.6504	23.777	23.7895	23.921
	0.91843	-0.31215	A0A140T8J4;Q9R257	A0A140T8J4;Q9R257	Heme-binding protein 1	Hebp1	3	3	3	24.2	24.2	24.2	21.053	0	31.771	97093000	21	3	3	3	3	3	3	3	3	3	2	3	3	3	3	3	3	3	3	3	3	3	2	3	3	23.1728	22.9801	23.2072	23.1482	23.5617	23.5866	23.1807	23.3431
	1.2699	0.582097	A0A171EBK8;Q5SVL6-2;Q5SVL6	A0A171EBK8;Q5SVL6-2;Q5SVL6	Rap1 GTPase-activating protein 2	Rap1gap2	2	2	2	4.1	4.1	4.1	84.377	0	4.3483	42161000	8	2	2	2	2	2	2	2	2	2	2	1	2	2	2	2	2	2	2	2	2	2	2	1	2	22.3931	22.4166	22.2581	21.9128	22.0463	21.3624	21.9883	21.9487
	0.146635	0.0378946	A0A1B0GSS8;A0A1B0GQU8;P35980;A0A1B0GSA8;A0A1B0GSF7;A0A1B0GRZ3	A0A1B0GSS8;A0A1B0GQU8;P35980;A0A1B0GSA8;A0A1B0GSF7	60S ribosomal protein L18	Rpl18	3	3	3	21.9	21.9	21.9	17.958	0	30.42	167110000	13	2	2	2	2	2	2	2	2	2	3	2	2	2	2	2	2	2	2	2	2	2	3	2	2	24.0167	24.2345	24.0697	23.9524	24.1952	24.0597	23.9634	23.9537
	1.24689	0.117106	A0A1B0GR11;Q93092	A0A1B0GR11;Q93092	Transaldolase	Taldo1	10	10	10	25.1	25.1	25.1	42.151	0	40.378	299180000	97	9	9	8	8	7	9	8	9	9	8	8	9	9	9	8	8	7	9	8	9	9	8	8	9	24.8614	24.9521	24.9304	24.738	24.7968	24.8578	24.7354	24.9458
	0.0931039	-0.0757186	A0A1B0GR60;Q9CPX4;P49945;P29391	A0A1B0GR60;Q9CPX4;P49945;P29391	Ferritin;Ferritin light chain 2;Ferritin light chain 1	Ftl1;Ftl2	2	2	2	20	20	20	17.999	0	8.95	53694000	17	2	2	2	2	2	1	2	2	2	2	2	2	2	2	2	2	2	1	2	2	2	2	2	2	21.6709	22.3189	21.9311	21.8511	21.8066	22.4903	22.1439	22.6748
	0.366779	0.0567481	Q5PR72;A0A1B0GRJ9;F7D3W5;Q922S4-2;Q922S4-3;Q922S4	Q5PR72;A0A1B0GRJ9;F7D3W5;Q922S4-2;Q922S4-3;Q922S4	cGMP-dependent 3,5-cyclic phosphodiesterase	Pde2a	12	12	12	21.7	21.7	21.7	105.25	0	76.424	416810000	66	6	7	11	8	7	8	6	7	7	10	7	9	6	7	11	8	7	8	6	7	7	10	7	9	25.2696	25.3107	25.4222	25.3416	25.1886	25.3021	24.882	25.1323
	0.148685	0.0420119	A0A1B0GRP7;Q9Z2Y8;A0A1B0GSP5;A0A1B0GRR5;Q6P8V7;A0A1B0GSA1;A0A1B0GQY5;Q80ZV3	A0A1B0GRP7;Q9Z2Y8;A0A1B0GSP5;A0A1B0GRR5;Q6P8V7	Proline synthase co-transcribed bacterial homolog protein	Prosc	3	3	3	13.9	13.9	13.9	36.061	0	20.672	87453000	36	2	3	3	3	3	3	3	3	3	3	3	3	2	3	3	3	3	3	3	3	3	3	3	3	23.2188	23.1522	22.9146	23.0191	23.1526	22.9881	23.1136	23.3987
	0.967852	0.165546	A0A1B0GRU0;Q3TXX4;Q5SZA1-2;Q61983;Q5SZA1	A0A1B0GRU0;Q3TXX4	Vesicular glutamate transporter 1	Slc17a7	11	11	8	22.6	22.6	16.2	64.318	0	77.238	1187900000	210	10	10	11	10	10	10	10	10	10	10	10	10	7	7	8	7	7	7	7	7	7	7	7	8	27.1241	26.997	27.1407	26.7965	26.948	27.0206	26.9095	26.7501
	0.239586	0.179108	A0A1B0GRV0;Q9Z0S1;D3Z0E6;D3Z5X0	A0A1B0GRV0;Q9Z0S1;D3Z0E6	3(2),5-bisphosphate nucleotidase 1	Bpnt1	9	9	9	33.4	33.4	33.4	34.973	0	37.255	270640000	41	8	6	6	7	7	6	6	8	8	8	8	8	8	6	6	7	7	6	6	8	8	8	8	8	24.8822	24.8144	24.7895	24.2329	24.5005	25.2154	24.6623	24.7989
	0.181799	0.104273	A0A1B0GS58;Q9CQM9;A0A1B0GT04	A0A1B0GS58;Q9CQM9;A0A1B0GT04	Glutaredoxin-3	Glrx3	4	4	4	13.4	13.4	13.4	41.704	0	9.734	64157000	23	3	4	4	3	2	1	3	3	3	3	2	4	3	4	4	3	2	1	3	3	3	3	2	4	22.5602	22.8372	22.6527	22.5134	22.9583	22.2656	22.5373	22.8048
	0.0518691	-0.0300452	A0A1B0GSB2;P19253;A0A1B0GSQ6;A0A1B0GTA1;A0A1B0GS68;A0A1B0GQW6;A0A1B0GSL5;A0A1B0GSC2;A0A1B0GRH1;A0A1B0GSF0;A0A1B0GT00;A0A140T8K2	A0A1B0GSB2;P19253;A0A1B0GSQ6;A0A1B0GTA1;A0A1B0GS68	60S ribosomal protein L13a	Rpl13a	3	3	3	20.3	20.3	20.3	16.45	0	4.8826	30208000	27	2	2	1	2	1	1	2	2	2	1	1	1	2	2	1	2	1	1	2	2	2	1	1	1	21.5387	21.4693	21.9254	21.5157	21.9533	21.5545	21.5708	21.4773
	0.19884	-0.0835616	A0A1B0GSG5;Q91VI7;A0A1B0GRG4;A0A1B0GRY7	A0A1B0GSG5;Q91VI7;A0A1B0GRG4	Ribonuclease inhibitor	Rnh1	10	10	10	30.1	30.1	30.1	53.926	0	31.258	159500000	30	8	8	7	9	9	7	6	8	10	10	9	10	8	8	7	9	9	7	6	8	10	10	9	10	23.9363	23.8225	24.0719	23.7687	24.0432	24.2695	23.8948	24.1681
	0.97472	0.136152	Q564E2;A0A1B0GSX0;P06151;A0A1B0GSR9;D3YZQ9;A0A1B0GT41;A0A1B0GQX5;A0A1B0GSL7;A0A1B0GRW9;A0A1B0GS79;A0A1B0GRC1;A0A1B0GRS2;D3YVR7;D3YZE4;P00342;A0A1B0GSR2;A0A1B0GRE9	Q564E2;A0A1B0GSX0;P06151;A0A1B0GSR9;D3YZQ9;A0A1B0GT41;A0A1B0GQX5	L-lactate dehydrogenase;L-lactate dehydrogenase A chain	Ldha	20	20	19	76.5	76.5	72.9	36.498	0	202.04	3101300000	1072	19	18	18	18	17	17	17	19	16	20	18	19	18	17	17	17	16	16	16	18	15	19	17	18	28.2366	28.1891	28.1629	28.1784	28.0318	27.97	28.0859	27.9912
	0.215911	0.0162392	A0A1C7CYV0;B1AX58;Q99K51;Q61233	A0A1C7CYV0;B1AX58;Q99K51	Plastin-3	Pls3	16	16	13	32.4	32.4	26.9	70.642	0	44.688	212530000	48	10	9	11	12	12	11	10	10	12	15	9	13	8	8	9	10	10	10	8	8	9	13	7	10	24.3817	24.4007	24.3327	24.3707	24.3137	24.3819	24.4838	24.1234
	0.815226	-0.263463	A0A1C7ZMY3;D3Z5K8;Q80Z38-3;Q80Z38-2;Q80Z38	A0A1C7ZMY3;D3Z5K8;Q80Z38-3;Q80Z38-2;Q80Z38	SH3 and multiple ankyrin repeat domains protein 2	Shank2	5	5	5	6.1	6.1	6.1	134.61	0	8.1415	51049000	4	3	4	2	4	4	3	3	2	4	4	3	2	3	4	2	4	4	3	3	2	4	4	3	2	22.4845	22.2517	22.1285	22.7636	22.4736	22.4179	22.2208	22.3969
	0.0779268	0.0384528	A0A1D5RLG0;Q8BTX9;A0A1D5RM62	A0A1D5RLG0;Q8BTX9	Inactive hydroxysteroid dehydrogenase-like protein 1	Hsdl1	3	3	3	20.4	20.4	20.4	34.396	0	9.8276	46854000	10	2	1	2	3	2	2	3	2	2	3	2	2	2	1	2	3	2	2	3	2	2	3	2	2	22.1781	22.123	22.5105	22.244	22.4419	22.0103	22.6688	21.6044
	0.332142	0.177991	A0A1D5RLN6;A0A1B0GR85;Q8BRV5	A0A1D5RLN6;A0A1B0GR85;Q8BRV5	Uncharacterized protein KIAA1671	Kiaa1671	3	3	3	9.6	9.6	9.6	43.215	0	7.5412	853440000	96	2	2	3	2	3	3	2	2	1	3	2	3	2	2	3	2	3	3	2	2	1	3	2	3	25.8392	26.0142	25.9067	25.9847	25.9278	25.3135	26.0442	25.6717
	0.0601682	-0.066831	A0A1D5RLV3;B8XCJ6;Q8BLN6	A0A1D5RLV3;B8XCJ6;Q8BLN6	Protein unc-80 homolog	Unc80	2	2	2	1.4	1.4	1.4	363.1	0.01	2.2517	46758000	4	1	2	2	2	2	1	1	1	1	1	1	1	1	2	2	2	2	1	1	1	1	1	1	1	21.8953	23.0577	22.4367	22.8795	22.2337	22.477	21.7655	21.9315
	0.415348	0.340377	A0A1D5RLY6;Q8C052	A0A1D5RLY6;Q8C052	Microtubule-associated protein 1S;MAP1S heavy chain;MAP1S light chain	Map1s	4	4	4	6	6	6	91.025	0	6.6847	43137000	9	4	4	4	4	4	2	3	4	3	4	4	4	4	4	4	4	4	2	3	4	3	4	4	4	22.5037	21.7577	22.5533	21.8423	22.3759	21.5753	22.2581	21.8722
	0.893889	0.190465	A0A1D5RM83;E9PUA3;Q8R0S2;Q8R0S2-2	A0A1D5RM83;E9PUA3;Q8R0S2;Q8R0S2-2	IQ motif and SEC7 domain-containing protein 1	Iqsec1	11	11	9	15.7	15.7	14.2	117.93	0	40.349	187050000	40	7	9	8	8	9	8	7	8	9	8	9	9	5	7	6	7	7	6	5	6	7	6	7	7	24.3038	24.4162	24.3514	24.1943	24.3136	23.992	24.0904	23.9982
	0.704589	-0.113836	E9PUM4;A0A1L1SQ51;Q71LX4;Q8CDM9;A0A1L1SRI1;A0A1L1SQP9;A0A1L1SVA8	E9PUM4;A0A1L1SQ51;Q71LX4;Q8CDM9;A0A1L1SRI1	Talin-2	Tln2	14	14	13	11	11	10.4	271.66	0	117.44	202990000	49	12	10	10	10	11	10	9	8	9	14	10	9	11	9	10	9	11	9	8	8	9	13	9	8	24.2714	24.2572	24.1601	24.2141	24.4177	24.3984	24.1886	24.3763
	0.241379	-0.1311	A0A1L1SQA8;P62852	A0A1L1SQA8;P62852	40S ribosomal protein S25	Rps25	3	3	3	30.1	30.1	30.1	10.309	0	8.1627	80450000	39	2	1	2	2	2	3	2	3	1	2	2	2	2	1	2	2	2	3	2	3	1	2	2	2	23.0089	22.8141	23.1294	22.7319	23.2607	23.3531	22.7651	23.0326
	0.378845	0.0640367	A0A1L1SRG5;P23927	A0A1L1SRG5;P23927	Alpha-crystallin B chain	Cryab	6	6	6	67.7	67.7	67.7	15.385	0	46.637	261490000	71	5	6	5	5	5	6	5	5	5	4	5	5	5	6	5	5	5	6	5	5	5	4	5	5	24.8391	24.7266	24.7531	24.7483	24.7916	24.5867	24.4897	24.3888
	0.221505	-0.0210896	A0A1L1STE6;Q9D6R2;Q9D6R2-2	A0A1L1STE6;Q9D6R2;Q9D6R2-2	Isocitrate dehydrogenase [NAD] subunit alpha, mitochondrial	Idh3a	14	14	14	42.2	42.2	42.2	41.52	0	323.31	4314300000	667	14	13	13	13	13	13	14	14	14	14	14	14	14	13	13	13	13	13	14	14	14	14	14	14	28.5286	28.6128	28.5946	28.6447	28.603	28.5515	28.5829	28.5214
	1.55388	0.195809	A0A1L1SUX8;P01831	A0A1L1SUX8;P01831	Thy-1 membrane glycoprotein	Thy1	5	5	5	41.6	41.6	41.6	14.038	0	122.66	2249600000	284	5	5	5	5	5	5	5	5	5	5	5	5	5	5	5	5	5	5	5	5	5	5	5	5	27.9177	28.0795	27.9227	27.7309	27.8031	27.7985	27.5784	27.4969
	0.0308669	-0.00776545	A0A1L1SV25;P57780;A0A1L1SVJ6;D3Z0L8;D3Z761	A0A1L1SV25;P57780	Alpha-actinin-4	Actn4	24	11	7	37	20.6	12.3	107.11	0	128.69	367870000	90	10	10	8	10	9	8	7	7	10	9	7	10	6	6	4	6	6	5	3	5	6	5	3	6	24.9644	25.1089	25.2518	25.0817	25.1314	25.1352	24.9653	25.1582
	0.0525687	0.0177892	A0A1W2P6F6;A0A1W2P7Q9;Q60605-2;Q60605;A0A1W2P6G5;Q8CI43	A0A1W2P6F6;A0A1W2P7Q9;Q60605-2;Q60605;A0A1W2P6G5	Myosin light polypeptide 6	Myl6	7	7	7	47.4	47.4	47.4	17.005	0	62.797	450500000	162	6	6	6	6	6	6	6	6	7	6	6	7	6	6	6	6	6	6	6	6	7	6	6	7	25.4066	25.4483	25.7529	25.453	25.5929	25.5085	25.5416	25.4331
	0.574441	0.100922	A0A1W2P6P1;Q8BJU0-2;Q8BJU0;A0A1W2P7I5	A0A1W2P6P1;Q8BJU0-2;Q8BJU0;A0A1W2P7I5	Small glutamine-rich tetratricopeptide repeat-containing protein alpha	Sgta	7	7	7	41.2	41.2	41.2	23.214	0	32.4	113430000	56	6	4	6	7	6	7	7	5	6	7	6	4	6	4	6	7	6	7	7	5	6	7	6	4	23.4242	23.4706	23.6039	23.3566	23.5109	23.3284	23.4334	23.7578
	0.891666	-0.193022	A0A1W2P768;P84228;F8WI35;E0CYN1;E0CYR7	A0A1W2P768;P84228;F8WI35	Histone H3.2;Histone H3	Hist1h3b;H3f3a	4	1	1	30.4	17.7	17.7	20.246	0	44.983	229370000	49	1	1	1	1	1	1	1	1	1	1	1	1	1	1	1	1	1	1	1	1	1	1	1	1	24.6733	24.4162	24.6773	24.7482	24.8844	24.7133	23.7868	23.91
	0.0193343	-0.00957998	Q6ZWZ6;F7AEH4;A0A1W2P7A1;P63323	Q6ZWZ6;F7AEH4;A0A1W2P7A1;P63323	40S ribosomal protein S12	Rps12	4	4	4	31.8	31.8	31.8	14.515	0	11.38	141210000	97	4	3	4	3	4	4	4	4	4	4	3	4	4	3	4	3	4	4	4	4	4	4	3	4	23.5914	24.0062	23.558	23.8842	23.6193	23.6809	23.6846	23.687
	1.28264	-0.382615	A0A1W2P7H9;A0A1W2P7T3;P84089	A0A1W2P7H9;A0A1W2P7T3;P84089	Enhancer of rudimentary homolog	Erh	1	1	1	15.5	15.5	15.5	8.2033	0	18.65	98922000	23	1	1	1	1	1	1	1	1	1	1	1	1	1	1	1	1	1	1	1	1	1	1	1	1	22.9417	23.1217	23.1739	23.2826	23.4104	23.692	23.2009	23.1069
	0.955969	0.206032	A0A1W2P7X0;E9QMV2;Q4KML4	A0A1W2P7X0;E9QMV2;Q4KML4	Costars family protein ABRACL	Abracl	2	2	2	43.9	43.9	43.9	6.4374	0	28.463	123940000	12	2	2	2	1	1	1	2	1	2	2	1	1	2	2	2	1	1	1	2	1	2	2	1	1	23.806	23.7292	24.0386	23.6718	23.7074	23.5765	23.8218	23.7172
	1.75965	-0.20167	A0A1W2P7Y9;Q810U4-2;Q810U4;Q810U4-3;A0A1W2P814;Q810U4-5;A0A1W2P6P3;Q810U4-4;A0A1W2P7R6	A0A1W2P7Y9;Q810U4-2;Q810U4;Q810U4-3	Neuronal cell adhesion molecule	Nrcam	18	18	18	27.8	27.8	27.8	125.51	0	147.63	735340000	175	15	15	18	18	15	15	17	17	15	18	16	16	15	15	18	18	15	15	17	17	15	18	16	16	26.1851	26.0185	26.0672	26.2627	26.3056	26.3077	26.2028	26.2266
	0.42841	-0.174169	A0A1Y7VNC1;A0A1Y7VJZ2;Q9WVL0	A0A1Y7VNC1;A0A1Y7VJZ2;Q9WVL0	Maleylacetoacetate isomerase	Gstz1	3	3	3	28	28	28	17.986	0	24.609	54016000	6	3	3	3	3	3	2	2	3	3	3	3	3	3	3	3	3	3	2	2	3	3	3	3	3	22.434	22.2412	22.1041	22.3675	22.7117	22.2226	22.3193	22.5062
	0.563479	0.417903	A0A1Y7VK09	A0A1Y7VK09			3	1	1	13.8	5.1	5.1	43.109	0	10.212	22822000	5	1	1	1	1	1	1	1	1	1	1	1	1	1	1	1	1	1	1	1	1	1	1	1	1	20.732	21.2875	21.8204	20.6653	20.9683	20.9526	20.796	21.9373
	0.0953761	-0.0229289	A0A1Y7VKR5;Q9QYC1-2;Q9QYC1;A0A1Y7VJ77;A0A1Y7VLV8	A0A1Y7VKR5;Q9QYC1-2;Q9QYC1;A0A1Y7VJ77;A0A1Y7VLV8	Pecanex-like protein 1	Pcnx	2	2	2	1.2	1.2	1.2	257.53	0.0081197	2.3675	319980000	2	2	2	2	2	2	2	2	2	1	2	2	2	2	2	2	2	2	2	2	2	1	2	2	2	24.4565	24.337	24.4908	24.3106	24.5506	24.4918	24.3667	24.4603
	0.185933	-0.15773	S4R1N6;F6YVP7;A0A1Y7VKY1;P62270	S4R1N6;F6YVP7;A0A1Y7VKY1;P62270	40S ribosomal protein S18	Rps18;Gm10260	4	4	4	34.6	34.6	34.6	12.483	0	10.654	95739000	48	3	2	3	2	3	3	4	4	3	3	4	4	3	2	3	2	3	3	4	4	3	3	4	4	22.873	23.4054	23.4803	23.7165	22.8904	23.6249	23.2447	22.3664
	0.142946	-0.0549189	A0A1Y7VLK0;Q62446;A0A1Y7VMJ9;A0A1Y7VJ86;A0A1Y7VP01	A0A1Y7VLK0;Q62446;A0A1Y7VMJ9;A0A1Y7VJ86;A0A1Y7VP01	Peptidyl-prolyl cis-trans isomerase FKBP3	Fkbp3	2	2	2	13.8	13.8	13.8	21.069	0	9.2126	70366000	12	2	2	2	2	2	2	2	1	1	2	2	1	2	2	2	2	2	2	2	1	1	2	2	1	22.7034	22.704	22.9985	22.6506	22.966	22.9541	22.9876	22.9026
	0.00904318	-0.00666491	A0A1Y7VLP0;P56379	A0A1Y7VLP0;P56379	6.8 kDa mitochondrial proteolipid	Mp68	1	1	1	14	14	14	6.5608	0.0017841	2.7386	254770000	32	1	1	1	1	1	1	1	1	1	1	1	1	1	1	1	1	1	1	1	1	1	1	1	1	24.8316	24.2778	24.8815	24.9038	24.401	24.706	24.7843	24.3058
	0.137638	-0.045634	A0A1Y7VM38;P52503;A0A1Y7VKP8	A0A1Y7VM38;P52503;A0A1Y7VKP8	NADH dehydrogenase [ubiquinone] iron-sulfur protein 6, mitochondrial	Ndufs6	3	3	3	29	29	29	14.092	0	29.225	183200000	57	3	3	3	3	3	2	3	3	3	3	3	3	3	3	3	3	3	2	3	3	3	3	3	3	24.0292	24.0939	24.1834	23.9754	24.3633	24.1046	24.261	24.0309
	0.0240237	0.00757154	A0A1Y7VM54;Q9D1D4;Q9D1D4-2	A0A1Y7VM54;Q9D1D4;Q9D1D4-2	Transmembrane emp24 domain-containing protein 10	Tmed10	2	2	2	17.2	17.2	17.2	13.814	0	10.384	42318000	20	2	2	2	2	2	1	2	2	2	2	2	2	2	2	2	2	2	1	2	2	2	2	2	2	21.696	21.7728	21.8584	21.7777	21.6	21.9266	22.3359	22.2294
	0.844043	-0.279233	A0A1Y7VM65;Q9QUH0	A0A1Y7VM65;Q9QUH0	Glutaredoxin-1	Glrx	5	5	5	73.8	73.8	73.8	9.3868	0	15.566	116780000	26	4	5	5	5	5	5	4	5	4	4	4	5	4	5	5	5	5	5	4	5	4	4	4	5	23.2862	23.5057	23.6947	23.5888	23.8126	23.9228	23.3625	23.1961
	0.0338653	0.00704702	F8VPK5;A0A1Y7VMN0;P70336;P70336-2;A0A1Y7VLD1	F8VPK5;A0A1Y7VMN0;P70336;P70336-2	Rho-associated protein kinase;Rho-associated protein kinase 2	Rock2	15	15	14	16.7	16.7	16	160.61	0	76.439	182750000	40	10	8	11	12	9	7	10	11	11	11	11	10	9	8	11	12	9	7	10	10	11	11	11	9	24.1716	24.2004	24.3871	24.2109	24.249	24.2781	23.8118	24.0483
	0.0170473	0.012427	A0A1Y7VN70;Q80Y14	A0A1Y7VN70;Q80Y14	Glutaredoxin-related protein 5, mitochondrial	Glrx5	2	2	2	28	28	28	12.168	0	32.778	44795000	15	2	2	1	2	2	2	2	1	2	2	2	2	2	2	1	2	2	2	2	1	2	2	2	2	22.0328	22.3478	21.6988	21.7222	22.2403	22.0796	22.239	22.2692
	0.625242	0.120653	A0A286YCW7;A0A286YD56;D3Z4E2;Q8CFV4	A0A286YCW7;A0A286YD56;D3Z4E2;Q8CFV4	Neuritin	Nrn1	1	1	1	10.7	10.7	10.7	15.118	0	12.46	41381000	23	1	1	1	1	1	1	1	1	1	1	1	1	1	1	1	1	1	1	1	1	1	1	1	1	22.2319	22.2156	22.291	22.0214	22.2912	22.0639	21.7206	21.6897
	0.0411285	0.0333818	A0A286YD12;Q91YP2;A0A286YD77	A0A286YD12;Q91YP2	Neurolysin, mitochondrial	Nln	3	3	3	5.3	5.3	5.3	77.893	0	4.682	231390000	2	3	3	3	2	3	2	2	3	2	3	2	2	3	3	3	2	3	2	2	3	2	3	2	2	24.2686	24.4142	24.2174	24.6112	23.7346	24.4544	24.5436	25.0536
	0.54841	-0.181521	A0A286YD58;A0A286YDU3;Q9DCR2	A0A286YD58;A0A286YDU3;Q9DCR2	AP-3 complex subunit sigma-1	Ap3s1	1	1	1	27.8	27.8	27.8	6.4022	0	12.357	30168000	15	1	1	1	1	1	1	1	1	1	1	1	1	1	1	1	1	1	1	1	1	1	1	1	1	21.5042	21.3123	21.7776	21.8047	21.7246	21.6094	21.4445	21.3569
	0.550919	-0.52802	A0A286YDG5;Q8CG46-2;Q8CG46	A0A286YDG5;Q8CG46-2;Q8CG46	Structural maintenance of chromosomes protein 5	Smc5	2	2	2	1.8	1.8	1.8	119.26	0.0048035	2.5074	366340000	6	2	2	2	2	2	2	1	2	2	2	2	2	2	2	2	2	2	2	1	2	2	2	2	2	23.9096	25.3087	24.7836	25.0789	25.4276	25.0794	25.2765	25.6249
	0.00597286	-0.0077877	A0A286YDI8;G3X972;A0A286YD08	A0A286YDI8;G3X972;A0A286YD08		Sec24c	5	5	5	7.5	7.5	7.5	111.61	0	18.058	66848000	3	4	4	4	5	5	3	3	4	4	5	4	4	4	4	4	5	5	3	3	4	4	5	4	4	21.8905	23.3277	22.8666	22.7547	22.7659	22.5876	22.9346	22.7185
	1.07093	0.120744	A0A286YDR2;P62823;Q9CXS2	A0A286YDR2;P62823;Q9CXS2	Ras-related protein Rab-3C	Rab3c	6	5	4	32.4	28.9	25.3	25.613	0	62.587	595260000	141	5	5	5	5	5	5	5	5	5	5	5	5	4	4	4	4	4	4	4	4	4	4	4	4	25.8958	25.9814	25.9119	25.8999	25.7509	25.7762	25.8724	25.6651
	0.306198	0.252806	A0A286YDS5;Q99KF1	A0A286YDS5;Q99KF1	Transmembrane emp24 domain-containing protein 9	Tmed9	1	1	1	5.3	5.3	5.3	24.597	0	9.28	11857000	3	1	1	1	1	1	1	1	1	1	1	1	1	1	1	1	1	1	1	1	1	1	1	1	1	21.1024	20.1787	20.1863	20.5118	20.0797	20.1174	20.1429	19.6945
	0.0618517	-0.0336927	A0A2C9F2D2;Q07076;A0A286YCW4	A0A2C9F2D2;Q07076	Annexin A7	Anxa7	4	4	4	10.3	10.3	10.3	52.27	0	36.81	86465000	38	3	3	3	2	2	3	3	3	2	3	2	4	3	3	3	2	2	3	3	3	2	3	2	4	22.8183	23.006	23.1156	22.6975	23.2704	23.0731	23.2224	23.1252
	0.100151	-0.0386518	A0A2I3BPT1;A0A2I3BQZ9;Q3TWF3;P12023-2;P12023-3;P12023;A0A2I3BR03	A0A2I3BPT1;A0A2I3BQZ9;Q3TWF3;P12023-2;P12023-3;P12023;A0A2I3BR03	Amyloid beta A4 protein;N-APP;Soluble APP-alpha;Soluble APP-beta;C99;Beta-amyloid protein 42;Beta-amyloid protein 40;C83;P3(42);P3(40);C80;Gamma-secretase C-terminal fragment 59;Gamma-secretase C-terminal fragment 57;Gamma-secretase C-terminal fragment 50;C31	App	5	5	5	10.6	10.6	10.6	82.785	0	19.735	83593000	4	5	3	4	2	5	1	3	4	5	5	3	4	5	3	4	2	5	1	3	4	5	5	3	4	22.8367	23.2832	23.1663	23.1956	23.07	23.1365	23.1251	22.7954
	1.53198	0.513282	A0A2I3BQF4;P62889	A0A2I3BQF4;P62889	60S ribosomal protein L30	Rpl30	1	1	1	12.8	12.8	12.8	10.457	0	11.287	65486000	14	1	1	1	1	1	1	1	1	1	1	1	1	1	1	1	1	1	1	1	1	1	1	1	1	22.9416	23.1499	22.9312	22.2221	22.6	22.6608	22.3466	23.0161
	1.07503	-0.396339	A0A2I3BQP6;Q923T9-3;Q923T9-2;Q923T9;A0A286YDK9;A0A286YCH4;A0A286YCI7	A0A2I3BQP6;Q923T9-3;Q923T9-2;Q923T9	Calcium/calmodulin-dependent protein kinase type II subunit gamma	Camk2g	12	6	3	30.3	17.5	10.6	63.239	0	20.885	186670000	9	5	4	4	4	6	3	3	4	6	4	5	5	2	2	2	3	3	2	2	2	3	2	3	3	24.0346	23.6975	24.2935	24.3749	24.431	24.4087	23.5394	24.2602
	0.502233	0.126457	A2AFI4;A2AFI3;A0A2I3BRL8;Q9WV02-2;Q91VM5;Q9WV02;A0A2I3BQC0	A2AFI4;A2AFI3;A0A2I3BRL8;Q9WV02-2;Q91VM5;Q9WV02;A0A2I3BQC0	RNA-binding motif protein, X chromosome;RNA-binding motif protein, X chromosome, N-terminally processed;RNA binding motif protein, X-linked-like-1	Rbmx;Rbmxl1	2	2	2	26.2	26.2	26.2	11.298	0	9.25	76596000	5	2	2	2	2	2	2	2	2	2	2	2	2	2	2	2	2	2	2	2	2	2	2	2	2	22.9803	22.8689	23.0225	22.6981	23.0269	22.7674	23.024	23.2021
	0.464944	0.436205	A0A2R8VHJ0;P16045	A0A2R8VHJ0;P16045	Galectin-1	Lgals1	1	1	1	51.4	51.4	51.4	3.6553	0	27.231	55802000	9	1	1	1	1	1	1	1	1	1	1	1	1	1	1	1	1	1	1	1	1	1	1	1	1	22.1669	22.9302	22.0761	21.9677	22.4715	21.4254	23.0262	22.378
	0.985986	-0.361341	A0A2R8VJW0	A0A2R8VJW0			3	1	1	59.7	17.7	17.7	7.5115	0.0073307	2.426	102260000	18	1	1	1	1	1	1	1	1	1	1	1	1	1	1	1	1	1	1	1	1	1	1	1	1	23.0727	23.346	23.2591	23.3054	23.8254	23.631	23.3013	23.5406
	0.143345	-0.0393645	A0A2R8W6R3;P62878	A0A2R8W6R3;P62878	E3 ubiquitin-protein ligase RBX1;E3 ubiquitin-protein ligase RBX1, N-terminally processed	Rbx1	1	1	1	21.7	21.7	21.7	9.1173	0	9.6145	17041000	1	1	1	1	1	1	1	1	1	1	1	1	1	1	1	1	1	1	1	1	1	1	1	1	1	20.8599	20.5739	20.8231	20.6956	20.8365	20.8429	20.7146	20.8584
	0.481793	0.0522461	A0A2R8W6V9;Q9Z1S5-2;Q9Z1S5;A0A2R8VHR7;A0A2R8VHB2	A0A2R8W6V9;Q9Z1S5-2;Q9Z1S5;A0A2R8VHR7	Neuronal-specific septin-3	2018-09-03	11	11	11	42.5	42.5	42.5	39.159	0	69.474	506040000	178	10	8	9	8	10	10	10	9	9	9	10	11	10	8	9	8	10	10	10	9	9	9	10	11	25.5276	25.6536	25.5782	25.5853	25.4826	25.5347	25.5675	25.5857
	0.658721	-0.263608	D3Z4T6;A0A4W9;Q80Z24	D3Z4T6;A0A4W9;Q80Z24	Neuronal growth regulator 1	Negr1	1	1	1	4	4	4	36.208	0	7.4917	64482000	35	1	1	1	1	1	1	1	1	1	1	1	1	1	1	1	1	1	1	1	1	1	1	1	1	22.247	22.651	22.7127	22.7821	22.9948	22.6247	22.5645	22.5405
	0.17605	-0.0755545	A0JNY3;Q8BUV3	A0JNY3;Q8BUV3	Gephyrin;Molybdopterin adenylyltransferase;Molybdopterin molybdenumtransferase	Gphn	14	14	14	34.1	34.1	34.1	83.665	0	75.659	329210000	89	11	13	11	10	11	11	10	13	11	12	12	11	11	13	11	10	11	11	10	13	11	12	12	11	24.9353	25.2301	25.1042	24.9255	25.4057	25.1652	24.8556	24.8682
	0.159239	0.044054	A1BN54;O88990	A1BN54		Actn1	37	37	1	52.8	52.8	1.9	102.72	0	323.31	1335800000	456	34	30	31	28	31	27	29	31	32	34	33	34	1	1	1	1	1	0	0	1	1	1	1	1	26.9392	27.1359	26.9673	27.1141	26.9719	26.8243	26.8969	27.0121
	0.711164	0.153284	A2A6U3;Q80UG5-3;Q80UG5;A2A6U5;Q80UG5-2;A8Y5D3	A2A6U3;Q80UG5-3;Q80UG5;A2A6U5;Q80UG5-2	Septin-9	2018-09-09	6	6	6	15	15	15	63.772	0	17.293	114910000	34	4	5	4	3	3	2	2	3	5	3	4	4	4	5	4	3	3	2	2	3	5	3	4	4	23.44	23.7335	23.5434	23.3235	23.458	23.4756	23.2145	23.536
	0.198486	-0.050607	A2A7S7;Q91WQ3;F6VXZ2	A2A7S7;Q91WQ3	Tyrosine--tRNA ligase;Tyrosine--tRNA ligase, cytoplasmic;Tyrosine--tRNA ligase, cytoplasmic, N-terminally processed	Yars	14	14	14	28	28	28	63.001	0	28.9	179270000	74	12	9	12	11	7	10	10	10	10	10	9	9	12	9	12	11	7	10	10	10	10	10	9	9	24.1253	24.1397	24.2726	24.2876	24.0603	24.3416	24.0296	24.0401
	1.7939	0.234838	A6PWB1;A2A958;A6PWB6;A0A1Y7VJ51;A0A1Y7VJG6;Q5RJV9;E9Q5G7;L7N1Y3	A6PWB1;A2A958;A6PWB6;A0A1Y7VJ51;A0A1Y7VJG6;Q5RJV9;E9Q5G7;L7N1Y3		C87977;Oog1;Gm10436	2	2	2	7	7	7	37.625	0.008921	2.3329	61803000	15	2	2	2	2	2	2	2	2	1	2	2	2	2	2	2	2	2	2	2	2	1	2	2	2	22.6377	22.4657	22.5127	22.3605	22.2782	22.2729	22.5447	22.7368
	0.232448	-0.187693	A2A977;O88833;A2A974;A0A087WS15;F8WGU9;A2A8T1;O35728;Q91WL5	A2A977;O88833	Cytochrome P450 4A10	Cyp4a10	3	3	3	7.4	7.4	7.4	57.188	0	3.5967	87366000	16	2	2	2	2	1	2	1	2	2	2	2	2	2	2	2	2	1	2	1	2	2	2	2	2	22.6642	23.492	22.5044	23.0145	22.9722	23.237	23.1999	23.0809
	0.243306	0.0402927	A2A9S3;A2A9S2;A2A9R8;A2A9R6;Q8BVA9;A2A9S0;Q61701-2;Q61701;H3BLG7;A2A9R4;A2A9S1;A2A9R5	A2A9S3;A2A9S2;A2A9R8;A2A9R6;Q8BVA9;A2A9S0;Q61701-2;Q61701;H3BLG7;A2A9R4	ELAV-like protein;ELAV-like protein 4	Elavl4;Elavl2	4	4	1	13.5	13.5	3.1	39.269	0	8.7087	25777000	3	3	2	3	3	3	2	1	1	3	2	3	2	0	0	0	0	0	0	0	0	0	0	1	0	21.4674	21.3185	21.3674	21.3559	21.2548	21.4217	21.3866	21.4099
	0.250624	-0.151111	S4R2D2;A2A9W7;Q8BMI3	S4R2D2;A2A9W7;Q8BMI3	ADP-ribosylation factor-binding protein GGA3	Gga3	3	3	3	9.6	9.6	9.6	64.524	0	10.891	59794000	12	1	3	2	3	2	1	1	3	3	2	2	2	1	3	2	3	2	1	1	3	3	2	2	2	22.0595	22.3119	22.5068	22.8448	22.2656	22.2212	22.55	23.1251
	0.28057	0.111946	A2A9X5;Q9JM14	A2A9X5;Q9JM14	5(3)-deoxyribonucleotidase, cytosolic type	Nt5c	4	4	4	33.5	33.5	33.5	21.939	0	51.285	180010000	68	4	4	4	4	4	4	4	4	4	4	4	4	4	4	4	4	4	4	4	4	4	4	4	4	24.045	24.2608	24.2751	24.2611	23.8007	24.1834	24.1242	24.106
	0.145344	-0.0955435	A2AAW9;Q9Z0N1;Q9Z0N2	A2AAW9;Q9Z0N1	Eukaryotic translation initiation factor 2 subunit 3, X-linked	Eif2s3x	3	3	3	12.5	12.5	12.5	37.194	0	5.7042	56930000	5	2	2	2	2	3	2	2	3	3	2	3	2	2	2	2	2	3	2	2	3	3	2	3	2	22.0212	22.6575	22.699	22.6044	22.349	22.7108	22.2094	22.2509
	0.0311336	-0.0359929	A2AC13;P60764	A2AC13;P60764	Ras-related C3 botulinum toxin substrate 3	Rac3	4	1	1	22.2	7.6	7.6	20.735	0	3.86	24324000	13	1	1	1	1	1	1	1	1	1	1	1	1	1	1	1	1	1	1	1	1	1	1	1	1	20.8565	21.5649	21.3586	21.5961	20.641	21.6507	20.9442	21.2747
	0.048249	0.0273348	A2ACG7;Q9DBG6	A2ACG7;Q9DBG6	Dolichyl-diphosphooligosaccharide--protein glycosyltransferase subunit 2	Rpn2	7	7	7	22.3	22.3	22.3	67.501	0	44.866	102650000	29	3	4	6	4	5	2	3	7	6	7	3	6	3	4	6	4	5	2	3	7	6	7	3	6	23.0038	23.6292	23.3443	23.2895	23.4255	23.1804	23.261	23.6402
	0.552239	-0.213537	A2AE27;Q9DBT5	A2AE27;Q9DBT5	AMP deaminase 2	Ampd2	3	3	3	4.6	4.6	4.6	94.695	0	4.1957	40058000	3	3	3	2	2	3	2	2	2	2	2	2	2	3	3	2	2	3	2	2	2	2	2	2	2	21.7843	21.857	21.8342	21.7363	22.324	22.0557	22.0783	22.0138
	1.29187	-0.60166	A2AEC2;Q9DB24;Q8R0A5;A2AEC1;Q8CCT4	A2AEC2;Q9DB24;Q8R0A5;A2AEC1;Q8CCT4	Transcription elongation factor A protein-like 3;Transcription elongation factor A protein-like 5	Tceal3;Tceal6;Tceal5	2	2	2	11.4	11.4	11.4	19.925	0	3.9496	29380000	31	2	1	1	1	1	2	1	1	1	1	1	1	2	1	1	1	1	2	1	1	1	1	1	1	21.0983	21.2588	21.6428	21.7293	21.8562	22.2194	21.4238	21.0416
	0.744293	0.201441	A2AEW5;A2AEW9;A2AEW8;Q8VD04;A2AEW6	A2AEW5;A2AEW9;A2AEW8;Q8VD04;A2AEW6	GRIP1-associated protein 1	Gripap1	5	5	5	19.4	19.4	19.4	56.401	0	16.058	43890000	4	2	3	5	4	5	2	1	3	4	5	4	4	2	3	5	4	5	2	1	3	4	5	4	4	22.1329	22.1899	21.8173	21.7703	21.9251	21.8404	22.1877	21.7889
	0.345614	-0.136424	A2AFG7;A2AFG8;Q6PGJ3;P11627;F7A5H7;B7ZCD3;F6UIL7	A2AFG7;A2AFG8;Q6PGJ3;P11627	Neural cell adhesion molecule L1	L1cam	11	11	11	15.4	15.4	15.4	139.82	0	96.833	327750000	84	10	9	10	9	10	9	11	9	9	10	10	10	10	9	10	9	10	9	11	9	9	10	10	10	24.5575	25.0383	24.5404	24.8708	24.8422	24.8325	25.0751	25.0489
	0.261238	-0.0763391	Q99N15;A2AFQ2;O08756	Q99N15;A2AFQ2;O08756	3-hydroxyacyl-CoA dehydrogenase type-2	Hsd17b10	9	9	9	50.6	50.6	50.6	27.273	0	49.525	301150000	97	7	7	8	7	8	7	6	7	6	8	7	6	7	7	8	7	8	7	6	7	6	8	7	6	25.0253	24.8106	24.9253	25.1317	24.8047	25.0538	24.5174	25.1419
	0.276035	0.114155	A2AGI2;Q8BYM5;A2AGI3;A2AGI0	A2AGI2;Q8BYM5;A2AGI3;A2AGI0	Neuroligin-3	Nlgn3	6	6	5	14.7	14.7	13.1	93.486	0	25.986	188450000	34	4	4	4	5	4	5	2	4	5	4	3	5	3	3	3	4	3	4	2	3	4	3	2	4	24.0567	24.6139	24.3584	24.2005	24.309	24.1771	23.6752	24.1429
	0.21781	-0.0895176	A2AGN7;B7ZCF1;O88685;A0A087WPH7;F6Q2E3	A2AGN7;B7ZCF1;O88685;A0A087WPH7	26S protease regulatory subunit 6A	Psmc3	8	8	8	29.8	29.8	29.8	44.669	0	52.379	173480000	49	7	7	6	7	7	7	6	5	7	6	6	7	7	7	6	7	7	7	6	5	7	6	6	7	23.915	24.1427	23.9559	24.0728	24.3531	23.8563	24.1156	24.3539
	0.392585	0.0926812	A2AH25;Q5FWK3	A2AH25;Q5FWK3	Rho GTPase-activating protein 1	Arhgap1	9	9	9	31.3	31.3	31.3	54.437	0	79.997	418960000	55	9	8	8	7	8	6	6	8	8	9	9	8	9	8	8	7	8	6	6	8	8	9	9	8	25.5433	25.2417	25.3251	25.2847	25.3478	25.1996	25.4716	25.4784
	0.532379	0.147724	A2AL12;Q8BG05;B2RXM2;J3QNY1;Q8BG05-2;A2AL13	A2AL12;Q8BG05;B2RXM2;J3QNY1;Q8BG05-2	Heterogeneous nuclear ribonucleoprotein A3	Hnrnpa3;Gm6793;Gm9242	9	9	9	35.2	35.2	35.2	34.476	0	100.1	665910000	350	8	8	9	8	8	8	8	8	9	8	8	9	8	8	9	8	8	8	8	8	9	8	8	9	26.1267	25.9794	25.875	25.9211	25.9653	25.6515	26.1198	25.7958
	0.33276	0.0672092	Q8C048;A2ALL9;Q0VF55	Q8C048;A2ALL9;Q0VF55	Calcium-transporting ATPase	Atp2b3	25	15	15	28.2	19.2	19.2	125.71	0	138.46	602520000	138	13	13	13	14	14	13	12	13	13	13	13	14	13	13	13	14	14	13	12	13	13	13	13	14	25.8989	25.9725	26.0695	25.9346	26.0169	25.7878	25.7335	25.7636
	0.311194	0.583249	A2ALS4;A2ALS5;A2ALS5-4;A2ALS5-3;A2ALS5-2;A2ALS3;A2ALS2	A2ALS4;A2ALS5;A2ALS5-4;A2ALS5-3;A2ALS5-2	Rap1 GTPase-activating protein 1	Rap1gap	8	8	6	17.6	17.6	13.9	81.251	0	13.466	92290000	13	5	4	4	4	5	5	4	5	7	6	5	3	4	3	3	3	4	4	3	4	5	4	4	2	23.5228	22.8866	22.8637	23.1026	23.373	21.0478	23.35	23.0619
	0.515589	0.0417468	A2ALV3;Q62420;Q8BXU5;A2ALV1;F6ZL13	A2ALV3;Q62420;Q8BXU5;A2ALV1;F6ZL13	Endophilin-A1	Sh3gl2	16	16	11	35	35	28.8	48.295	0	205.13	2656800000	632	16	16	16	16	16	16	16	16	15	15	16	16	11	11	11	11	11	11	11	11	10	11	11	11	27.983	28.0267	28.0257	27.9094	27.9804	28.0204	27.8727	27.8629
	0.345233	0.0996876	A2AMH3;A2AMH5;A2AMH4;Q6X893;Q6X893-2;A2AMH8	A2AMH3;A2AMH5;A2AMH4;Q6X893;Q6X893-2	Choline transporter-like protein 1	Slc44a1	6	6	6	14.3	14.3	14.3	59.117	0	48.352	152510000	53	6	5	4	6	4	4	3	5	5	4	5	6	6	5	4	6	4	4	3	5	5	4	5	6	23.7578	24.1061	23.7604	23.8084	23.7141	23.8027	23.6864	24.099
	0.0787418	-0.0379314	A2AMQ5;Q99L43;F6S4G2;Q6PBC0	A2AMQ5;Q99L43;F6S4G2	Phosphatidate cytidylyltransferase;Phosphatidate cytidylyltransferase 2	Cds2	4	4	4	15.7	15.7	15.7	49.293	0	87.116	210300000	74	2	1	2	3	2	3	2	4	3	3	3	3	2	1	2	3	2	3	2	4	3	3	3	3	24.1656	24.5196	24.3471	24.6087	24.1398	24.3975	24.3612	24.4808
	0.032549	-0.0138117	A2AP32;Q3UIU2	A2AP32;Q3UIU2	NADH dehydrogenase [ubiquinone] 1 beta subcomplex subunit 6	Ndufb6	2	2	2	25.8	25.8	25.8	11.741	0	35.604	189470000	102	2	2	2	2	2	2	2	2	2	2	2	2	2	2	2	2	2	2	2	2	2	2	2	2	24.404	24.3102	23.9863	24.3811	24.1877	24.1731	24.1089	24.4035
	0.578269	-0.18064	A2APL5;P43006-3;F7CAM6;F6ZRK3;A2AQI7	A2APL5;P43006-3	Amino acid transporter;Excitatory amino acid transporter 2	Slc1a2	13	1	1	27.3	2.1	2.1	60.875	0	7.6449	26158000	10	1	1	1	1	1	1	1	1	1	1	1	1	1	1	1	1	1	1	1	1	1	1	1	1	20.851	20.9736	21.1446	21.0181	21.3842	21.1087	21.525	21.4597
	0.0546005	-0.0152696	A2AQR0;Q64521	A2AQR0;Q64521	Glycerol-3-phosphate dehydrogenase;Glycerol-3-phosphate dehydrogenase, mitochondrial	Gpd2	29	29	29	52.2	52.2	52.2	82.829	0	307.22	1848600000	426	24	22	21	23	23	22	24	20	23	20	20	24	24	22	21	23	23	22	24	20	23	20	20	24	27.6221	27.5481	27.3866	27.5612	27.634	27.4074	27.5922	27.5566
	0.251432	-0.0366968	A2ARP8;Q9QYR6;Q9QYR6-2	A2ARP8;Q9QYR6;Q9QYR6-2	Microtubule-associated protein 1A;MAP1A heavy chain;MAP1 light chain LC2	Map1a	66	66	64	35.8	35.8	35	325.88	0	323.31	4835200000	1269	55	58	55	59	56	55	55	56	57	60	58	57	53	56	53	57	54	53	53	54	55	58	56	55	28.9211	28.761	28.8064	28.8703	28.921	28.8072	28.857	28.8733
	0.75986	-0.162483	A2AS47;A2AS45;Q68FH0-2;Q68FH0;A2AS44;Q68FH0-3	A2AS47;A2AS45;Q68FH0-2;Q68FH0;A2AS44;Q68FH0-3	Plakophilin-4	Pkp4	5	4	4	6.7	5.5	5.5	95.208	0	6.464	24791000	1	4	3	3	3	4	2	1	4	3	3	3	2	4	3	3	3	4	2	1	4	3	3	3	2	21.3268	21.3867	21.3059	21.6304	21.316	21.5604	21.2541	21.3574
	0.490572	0.0858548	A2AS98;P28660;P28660-2	A2AS98;P28660;P28660-2	Nck-associated protein 1	Nckap1	26	26	26	31.8	31.8	31.8	129.51	0	302.87	1196000000	352	24	22	23	23	23	20	24	23	24	23	23	23	24	22	23	23	23	20	24	23	24	23	23	23	26.9794	27.0038	26.8588	26.9124	26.7387	26.9333	26.8913	26.8734
	0.117075	-0.0792758	A2ATI9;Q99JX3-2;Q99JX3;A2ATI8;A2ATI6	A2ATI9;Q99JX3-2;Q99JX3;A2ATI8;A2ATI6	Golgi reassembly-stacking protein 2	Gorasp2	4	4	4	15.1	15.1	15.1	45.026	0	30.287	57972000	38	3	3	3	3	3	3	4	3	3	2	3	3	3	3	3	3	3	3	4	3	3	2	3	3	22.6325	22.077	22.8951	22.6255	22.695	22.5221	22.7556	22.472
	0.52316	0.203336	F6XJA1;G8JL68;A2ATP5;A2ATP6;Q8C854-2;Q8C854-3;Q8C854;Q8C854-1	F6XJA1;G8JL68;A2ATP5;A2ATP6;Q8C854-2;Q8C854-3;Q8C854;Q8C854-1	Myelin expression factor 2	Myef2	5	5	5	14.1	14.1	14.1	47.884	0	11.995	87765000	24	5	4	4	4	4	3	4	5	4	5	4	4	5	4	4	4	4	3	4	5	4	5	4	4	22.987	23.2369	23.5183	23.1941	22.9626	22.9755	22.8788	23.0322
	1.46151	-0.531317	F6VQ81;Q3TUJ9;Q8BKP1;Q3TAI4;A2AUD5;Q9CYZ2;V9GWU5	F6VQ81;Q3TUJ9;Q8BKP1;Q3TAI4;A2AUD5;Q9CYZ2;V9GWU5	Tumor protein D54	Tpd52l2	7	7	7	45.3	45.3	45.3	17.619	0	29.736	216930000	28	5	5	4	4	6	5	1	4	4	5	5	5	5	5	4	4	6	5	1	4	4	5	5	5	23.7353	23.8578	24.2034	24.434	24.639	24.3175	24.1203	24.2658
	0.264582	0.0549844	A2AUK5;A2AUK7;A2AUK8;Q9Z2H5;Q9Z2H5-3;Q9Z2H5-2;E9PV14;A0A2R8VHB6	A2AUK5;A2AUK7;A2AUK8;Q9Z2H5;Q9Z2H5-3;Q9Z2H5-2;E9PV14	Band 4.1-like protein 1	Epb4.1l1;Epb41l1	19	16	15	28.8	26.4	24.7	98.314	0	114.67	736860000	224	15	11	12	14	13	13	12	13	15	13	12	11	14	11	12	14	12	13	11	12	14	13	12	11	26.2625	26.0632	26.3181	26.1074	26.2112	26.1602	26.0588	25.9205
	0.287556	-0.0810019	F7BNZ5;A2AVX1;E9Q8Q5;Q80YN3	F7BNZ5;A2AVX1;E9Q8Q5;Q80YN3	Breast carcinoma-amplified sequence 1 homolog	Bcas1	3	3	3	12.9	12.9	12.9	40.426	0	32.127	135860000	31	2	2	3	3	2	2	3	3	2	3	3	3	2	2	3	3	2	2	3	3	2	3	3	3	23.434	23.4957	23.6302	23.5739	23.7825	23.4466	23.5671	23.5785
	0.0824405	-0.0196342	A2AWI7;Q8R3V5-1;Q8R3V5;A2AWI9;Q8R3V5-3	A2AWI7;Q8R3V5-1;Q8R3V5;A2AWI9;Q8R3V5-3	Endophilin-B2	Sh3glb2	13	13	13	37.9	37.9	37.9	44.907	0	125.84	376140000	158	11	11	9	12	12	12	10	13	11	12	12	13	11	11	9	12	12	12	10	13	11	12	12	13	25.2391	25.2275	25.3148	25.1489	25.2673	25.424	25.0834	25.2034
	0.642475	-0.194417	Q52KF7;A2BEE9;P70175;A2BEF2	Q52KF7;A2BEE9;P70175;A2BEF2	Disks large homolog 3	Dlg3	11	10	10	21.9	20.4	20.4	90.327	0	33.537	208270000	70	5	7	8	6	7	6	7	7	7	9	8	6	5	7	8	6	7	6	7	7	7	9	8	6	24.1608	24.5091	24.4792	24.4838	24.5141	24.7345	24.128	24.2814
	0.177455	0.0820421	Q3TPJ8;A2BFF5;A2BFF9;A2BFF8;O88487	Q3TPJ8;A2BFF5;A2BFF9;A2BFF8;O88487	Cytoplasmic dynein 1 intermediate chain 2	Dync1i2	4	4	4	13.3	13.3	13.3	70.612	0	23.948	85537000	19	3	3	3	2	2	2	4	3	2	4	4	2	3	3	3	2	2	2	4	3	2	4	4	2	23.0928	23.2648	22.8339	22.7709	22.9776	23.197	23.0099	23.2342
	2.11996	-0.255953	F6RB63;A2BI12;Q99JF8-2;Q99JF8	F6RB63;A2BI12;Q99JF8-2;Q99JF8	PC4 and SFRS1-interacting protein	Psip1	4	4	4	57.8	57.8	57.8	10.353	0	20.64	89684000	37	4	3	3	4	4	3	4	4	3	4	4	4	4	3	3	4	4	3	4	4	3	4	4	4	22.2879	22.4489	22.3242	22.5928	22.6421	22.594	22.6638	22.9916
	1.00546	0.306731	A2RT62	A2RT62	F-box/LRR-repeat protein 16	Fbxl16	10	10	10	31.5	31.5	31.5	51.878	0	61.693	134150000	48	9	8	8	10	8	7	5	7	9	9	6	7	9	8	8	10	8	7	5	7	9	9	6	7	24.1025	23.8563	23.7563	23.7766	23.4324	23.586	23.5816	23.6431
	0.797507	-0.270596	A3KGE4;G3X9Q7;Q8R357;O88998-3;O88998	A3KGE4;G3X9Q7;Q8R357;O88998-3;O88998	Noelin	Olfm1	3	3	3	8.6	8.6	8.6	51.027	0	5.4783	53563000	5	3	3	3	3	3	3	3	3	3	3	3	3	3	3	3	3	3	3	3	3	3	3	3	3	22.1238	22.3871	22.5142	22.4105	22.6537	22.7727	22.2352	22.6412
	1.56755	-0.0670668	A3KGU7;A3KGU9;P16546	A3KGU7;A3KGU9;P16546	Spectrin alpha chain, non-erythrocytic 1	Sptan1	133	133	1	65.8	65.8	0.6	285.15	0	323.31	21463000000	3882	125	124	126	123	125	122	125	122	121	123	125	122	1	1	1	1	1	1	1	1	1	1	1	1	30.9669	30.9697	30.9774	31.0475	31.0666	31.0011	30.9837	30.9548
	2.12875	-0.436795	A8DUK4;P02088;E9Q223;CON__Q3SX09;CON__P02070;P02104	A8DUK4;P02088	Hemoglobin subunit beta-1	Hbbt1;Hbb-b1	15	15	10	89.8	89.8	68	15.748	0	323.31	13804000000	1245	14	14	15	14	15	15	14	14	15	15	14	15	9	9	10	9	10	10	9	9	10	10	9	10	30.0116	30.2771	30.0422	30.5266	30.5201	30.5945	30.3827	30.6017
	1.60935	0.304018	B0QZN5;P63044;P63024	B0QZN5;P63044;P63024	Vesicle-associated membrane protein 2;Vesicle-associated membrane protein 3	Vamp2;Vamp3	6	6	5	42.9	42.9	42.9	17.862	0	225.14	2489800000	331	6	6	6	6	6	6	6	6	6	6	5	6	5	5	5	5	5	5	5	5	5	5	5	5	27.6547	27.8362	27.771	27.4955	27.5388	27.3156	27.8897	28.0557
	0.101037	-0.0328547	B0V2N1-4;B0V2N1-3;B0V2N1-6;B0V2N1-2;B0V2N1;B0V2N1-5;A0A286YEA4;A0A286YDS2;A0A286YDF6	B0V2N1-4;B0V2N1-3;B0V2N1-6;B0V2N1-2;B0V2N1;B0V2N1-5	Receptor-type tyrosine-protein phosphatase S	Ptprs	14	14	11	16.6	16.6	13.2	167.87	0	79.813	252070000	46	9	8	9	9	11	10	9	11	11	8	8	7	7	5	6	8	8	9	8	10	8	7	6	6	24.4189	24.7248	24.6085	24.7632	24.5117	24.5759	24.5639	24.6624
	0.107845	0.0284653	B0V2P5;Q8BPN8-2;Q8BPN8;F6RYL8;B0V2P6;Q8BPN8-3	B0V2P5;Q8BPN8-2;Q8BPN8;F6RYL8	DmX-like protein 2	Dmxl2	55	55	55	29	29	29	340.69	0	278.95	1444800000	346	42	42	45	41	43	41	40	40	39	42	43	43	42	42	45	41	43	41	40	40	39	42	43	43	27.2991	27.2022	27.0633	27.249	27.2002	27.03	27.0835	27.1215
	0.510642	0.163627	B1AQF4;Q9D7X3;H3BKL8;Q3V2Y9;H3BKD1	B1AQF4;Q9D7X3;H3BKL8;Q3V2Y9;H3BKD1	Dual specificity protein phosphatase 3	Dusp3	4	4	4	28.6	28.6	28.6	23.223	0	79.632	182470000	66	4	4	4	4	4	4	4	4	4	4	4	4	4	4	4	4	4	4	4	4	4	4	4	4	24.1488	24.1346	24.4725	23.9218	24.2142	24.129	24.1868	24.1317
	0.124658	-0.378319	B1AQW2;P10637-5;P10637-6;P10637-4;P10637-3;B1AQW4;B1AQW6;B1AQW5	B1AQW2;P10637-5;P10637-6;P10637-4;P10637-3	Microtubule-associated protein;Microtubule-associated protein tau	Mapt	10	1	1	39	6.2	6.2	40.891	0	31.202	159420000	37	1	1	1	1	1	1	1	1	1	1	1	1	1	1	1	1	1	1	1	1	1	1	1	1	23.8177	23.4865	21.5026	23.9056	24.3853	21.6508	24.2305	24.2828
	0.719182	-0.053332	B1AQX6;B1AQX7;B1AQX9;Q9QWI6-3;Q9QWI6-2;Q9QWI6;B1AQX8	B1AQX6;B1AQX7;B1AQX9;Q9QWI6-3;Q9QWI6-2;Q9QWI6	SRC kinase signaling inhibitor 1	Srcin1	25	25	25	36.4	36.4	36.4	126.99	0	282.06	697360000	269	22	21	21	22	20	19	20	20	20	22	19	21	22	21	21	22	20	19	20	20	20	22	19	21	26.0905	25.985	26.0514	26.1199	26.0706	26.0963	26.0073	26.0539
	1.33044	0.250525	B1AQY9;B1AQZ0;Q8CHH9;Q8CHH9-2;B7ZC46;E0CYM4	B1AQY9;B1AQZ0;Q8CHH9;Q8CHH9-2;B7ZC46	Septin-8	2018-09-08	16	16	12	45.5	45.5	34.2	51.145	0	180.63	827210000	252	15	15	15	14	14	15	14	12	14	15	14	13	12	12	12	11	11	11	12	10	12	12	12	11	26.3625	26.2981	26.5646	26.1597	26.2199	26.0941	26.4004	26.3104
	0.155559	-0.105143	Q3TET1;Q3UI47;B1AQZ2;P28741	Q3TET1;Q3UI47;B1AQZ2;P28741	Kinesin-like protein;Kinesin-like protein KIF3A	Kif3a	1	1	1	2.7	2.7	2.7	79.444	0	13.265	14877000	13	1	1	1	1	1	1	1	1	1	1	1	1	1	1	1	1	1	1	1	1	1	1	1	1	20.2485	20.233	20.5048	19.9603	20.6896	20.6518	20.4667	20.5853
	0.155348	0.109538	B1ARA3;B1ARA5;P61255	B1ARA3;B1ARA5;P61255	60S ribosomal protein L26	Rpl26	1	1	1	8.7	8.7	8.7	12.217	0.0047972	2.5013	29378000	11	1	1	1	1	1	1	1	1	1	1	1	1	1	1	1	1	1	1	1	1	1	1	1	1	21.8501	21.2695	22.1505	21.5629	21.7429	21.6357	21.1416	20.9638
	0.623287	-0.173361	B1ARW4;Q99LY9	B1ARW4;Q99LY9	NADH dehydrogenase [ubiquinone] iron-sulfur protein 5;NADH dehydrogenase [ubiquinone] iron-sulfur protein 5, N-terminally processed	Ndufs5	5	5	5	56	56	56	10.909	0	45.797	412080000	128	5	5	5	5	5	5	5	5	5	5	5	5	5	5	5	5	5	5	5	5	5	5	5	5	25.2039	25.1907	25.4839	25.3124	25.5006	25.5855	25.2012	25.366
	0.158834	0.123372	B1ASZ3;Q64516-1;Q64516-2;Q64516;Q9WU65	B1ASZ3;Q64516-1;Q64516-2;Q64516	Glycerol kinase	Gyk;Gk	4	4	4	9.1	9.1	9.1	59.832	0	9.7256	48951000	14	2	2	1	2	2	2	3	1	4	3	2	3	2	2	1	2	2	2	3	1	4	3	2	3	22.0576	22.4423	22.6671	22.3956	21.8174	22.5839	22.0451	22.21
	0.25172	0.163054	B1AT82;Q9D0M1	B1AT82;Q9D0M1	Phosphoribosyl pyrophosphate synthase-associated protein 1	Prpsap1	3	2	2	13.5	9.9	9.9	42.467	0	4.5766	27642000	13	1	1	1	1	2	1	1	2	1	1	1	1	1	1	1	1	2	1	1	2	1	1	1	1	21.1531	21.758	21.719	21.2521	21.711	21.1778	21.5641	21.5249
	0.27776	0.0644321	B1AT92;Q60631;Q60631-2;B1AT95	B1AT92;Q60631;Q60631-2	Growth factor receptor-bound protein 2	Grb2	8	8	8	38.9	38.9	38.9	23.587	0	37.036	190430000	50	8	8	8	8	7	7	6	7	8	7	8	8	8	8	8	8	7	7	6	7	8	7	8	8	24.1558	24.4383	24.358	24.1733	24.304	24.2815	24.1476	24.227
	0.446051	0.32482	B1AV77;B1ATI0;P47740;A0A140LJF9;P47739	B1AV77;B1ATI0;P47740	Aldehyde dehydrogenase;Fatty aldehyde dehydrogenase	Aldh3a2	4	4	4	10.3	10.3	10.3	54.33	0	8.2497	31061000	8	3	3	3	2	2	3	2	3	3	3	2	3	3	3	3	2	2	3	2	3	3	3	2	3	22.2392	21.9268	21.1869	21.4091	21.4896	21.4796	21.9586	21.0688
	1.22897	-0.261658	B1ATZ0;B1ATZ1;Q3UMA3;Q99LI8;B1ATY9;F6VV02	B1ATZ0;B1ATZ1;Q3UMA3;Q99LI8;B1ATY9	Hepatocyte growth factor-regulated tyrosine kinase substrate	Hgs	8	8	8	14	14	14	85.778	0	34.51	1728800000	37	8	6	7	6	6	4	3	7	8	8	6	7	8	6	7	6	6	4	3	7	8	8	6	7	27.4567	27.4157	27.3915	27.4867	27.7865	27.7757	27.4447	27.1404
	0.321705	0.0958506	B1AU25;Q9Z0X1	B1AU25;Q9Z0X1	Apoptosis-inducing factor 1, mitochondrial	Aifm1	6	6	6	15.3	15.3	15.3	66.113	0	22.94	167850000	18	6	5	6	4	4	4	5	4	4	5	4	5	6	5	6	4	4	4	5	4	4	5	4	5	24.0046	23.9149	24.3119	23.9927	23.9388	24.0125	24.1703	24.0577
	0.13705	0.0384998	B1AWD8;B1AWD9;O08585;B1AWE0;Q6PFA2;B1AWE1	B1AWD8;B1AWD9;O08585;B1AWE0;Q6PFA2;B1AWE1	Clathrin light chain A	Clta	5	5	5	16.5	16.5	16.5	25.661	0	12.68	207800000	177	4	5	4	4	4	4	4	5	5	3	5	5	4	5	4	4	4	4	4	5	5	3	5	5	24.5246	24.2461	24.3942	24.2536	24.321	24.4748	24.3985	24.2148
	0.0330869	-0.0178992	B1AWV9;Q5DTL9-2;Q5DTL9	B1AWV9;Q5DTL9-2;Q5DTL9	Anion exchange protein;Sodium-driven chloride bicarbonate exchanger	Slc4a10	9	9	9	13.3	13.3	13.3	124.61	0	32.771	163660000	48	9	6	4	7	6	3	6	7	6	9	7	5	9	6	4	7	6	3	6	7	6	9	7	5	23.7301	24.0292	23.6533	23.7987	24.0792	23.5884	23.8446	24.3766
	0.314207	-0.129147	B1AXV0	B1AXV0	DOMON domain-containing protein FRRS1L	Frrs1l	1	1	1	4.1	4.1	4.1	32.506	0	5.4145	14599000	2	1	1	1	1	1	1	1	1	1	1	1	1	1	1	1	1	1	1	1	1	1	1	1	1	20.4855	20.4823	20.6188	20.3365	20.7854	20.8522	20.6036	20.7321
	0.440074	-0.207485	B1AZ42;P0C0A3;B1AZ41	B1AZ42;P0C0A3;B1AZ41	Charged multivesicular body protein 6	Chmp6	2	2	2	34.6	34.6	34.6	9.032	0	17.21	23158000	13	2	2	2	2	2	2	2	1	2	2	1	1	2	2	2	2	2	2	2	1	2	2	1	1	21.3189	20.7206	21.3131	21.3758	21.2483	21.351	20.9505	21.2695
	0.535344	-0.130751	B1AZ46;Q8BKX1-4;Q8BKX1-3;Q8BKX1-2;Q8BKX1	B1AZ46;Q8BKX1-4;Q8BKX1-3;Q8BKX1-2;Q8BKX1	Brain-specific angiogenesis inhibitor 1-associated protein 2	Baiap2	11	11	11	25.7	25.7	25.7	57.681	0	60.526	234510000	95	10	9	8	9	9	8	7	8	9	8	9	10	10	9	8	9	9	8	7	8	9	8	9	10	24.5696	24.5125	24.3525	24.6696	24.7178	24.4394	24.3541	24.6928
	0.0869615	0.046044	B1AZP2-2;B7ZNS2;B1AZP2;B1AZP2-3;H3BKJ0;H3BJW9;I1E4X0;F6YMR0;E9PUF2	B1AZP2-2;B7ZNS2;B1AZP2	Disks large-associated protein 4	Dlgap4	5	5	5	8	8	8	107.55	0	6.0847	28564000	3	4	4	3	4	2	2	4	2	2	1	4	4	4	4	3	4	2	2	4	2	2	1	4	4	21.683	21.4053	21.4052	21.5826	21.6461	21.1267	21.5148	21.6095
	0.958398	0.234659	B1B1A8;Q6PDN3;Q6PDN3-2;Q6PDN3-3	B1B1A8;Q6PDN3;Q6PDN3-2;Q6PDN3-3	Myosin light chain kinase, smooth muscle;Myosin light chain kinase, smooth muscle, deglutamylated form	Mylk	2	2	2	0.8	0.8	0.8	213.61	0	3.9902	15047000	21	2	2	2	1	2	1	2	1	1	1	1	1	2	2	2	1	2	1	2	1	1	1	1	1	20.7219	20.5531	20.9161	20.4116	20.5712	20.5044	20.5868	20.4881
	1.05802	-0.179818	B2M1R7;Q61990;A0A2R8VHG2;A0A2R8VJY1;A0A2R8W6L5;A0A2R8VHZ0;A0A2R8VKN0;A0A2R8VI73;A0A2R8VI12;A0A2R8VI25;Q61990-2;Q61990-3;A0A2R8VI71;A0A2R8VHY9;A0A2R8VHP9;A0A2R8VHN3;A0A2R8VKF0;A0A2R8VHL8;Q3TT81;A0A2R8VI15;A0A2R8W6U6;A0A2R8VHI3;A0A2R8VI92;G3UYM5;A0A2R8W6H3	B2M1R7;Q61990;A0A2R8VHG2;A0A2R8VJY1;A0A2R8W6L5;A0A2R8VHZ0;A0A2R8VKN0;A0A2R8VI73;A0A2R8VI12;A0A2R8VI25;Q61990-2;Q61990-3;A0A2R8VI71;A0A2R8VHY9;A0A2R8VHP9;A0A2R8VHN3;A0A2R8VKF0;A0A2R8VHL8;Q3TT81	Poly(rC)-binding protein 2	Pcbp2	9	7	5	47.4	38.8	31.6	38.15	0	83.636	582820000	111	7	6	7	7	7	6	7	6	7	6	7	6	5	4	5	5	5	4	5	5	5	4	5	5	25.803	25.6829	25.6464	25.8424	26.018	25.8113	25.6657	25.9841
	0.494311	-0.147844	K3W4L0;B2RRE2;E9QAX2;Q9JMH9-4;Q9JMH9-1;Q9JMH9;Q9JMH9-6;E9QA74;E9Q405;A0A1C7ZN10;Q9JMH9-5;Q9JMH9-7;Q9JMH9-2	K3W4L0;B2RRE2;E9QAX2;Q9JMH9-4;Q9JMH9-1;Q9JMH9;Q9JMH9-6;E9QA74;E9Q405;A0A1C7ZN10;Q9JMH9-5;Q9JMH9-7;Q9JMH9-2	Unconventional myosin-XVIIIa	Myo18a	9	9	9	7.3	7.3	7.3	230.99	0	37.305	139890000	23	8	6	7	7	4	7	4	4	6	8	7	6	8	6	7	7	4	7	4	4	6	8	7	6	23.5997	23.7887	23.7078	23.661	24.0668	23.8119	23.6561	23.819
	0.906625	0.267568	B2RSH2	B2RSH2	Guanine nucleotide-binding protein G(i) subunit alpha-1	Gnai1	11	6	6	40.7	25.7	25.7	40.361	0	77.514	226950000	72	3	3	3	2	4	2	4	4	5	4	3	4	3	3	3	2	4	2	4	4	5	4	3	4	24.603	24.6674	24.3018	24.3704	24.2949	24.1042	24.5914	24.4111
	0.362214	0.202765	B2RWE8;Q8BGD9	B2RWE8;Q8BGD9	Eukaryotic translation initiation factor 4B	Eif4b	2	2	2	8.2	8.2	8.2	46.478	0	5.527	36845000	23	1	2	2	2	1	1	2	2	1	2	2	2	1	2	2	2	1	1	2	2	1	2	2	2	22.2277	21.8668	21.6272	22.0007	21.6369	21.4758	22.0702	21.6159
	0.291216	-0.0570838	B2RXT3;E9Q7L0	B2RXT3;E9Q7L0		Ogdhl	26	21	21	34.6	29.8	29.8	114.56	0	231.38	988790000	227	18	16	19	19	18	17	16	18	19	21	20	19	18	16	19	19	18	17	16	18	19	21	20	19	26.4006	26.5891	26.4502	26.6281	26.5471	26.4358	26.6421	26.6568
	2.10113	-0.341583	B7ZCB8;F7CJY7;F6X4N5;Q8BVI5;B7ZCB9	B7ZCB8;F7CJY7;F6X4N5;Q8BVI5;B7ZCB9	Syntaxin-16	Stx16	2	2	2	29.3	29.3	29.3	18.671	0	60.712	76172000	32	2	2	2	2	2	2	2	2	2	2	2	2	2	2	2	2	2	2	2	2	2	2	2	2	22.6324	22.502	22.6042	22.8672	23.035	22.8611	22.8448	22.9182
	0.439378	-1.07586	B7ZCR6;Q6PHP4	B7ZCR6;Q6PHP4		Znf512b	1	1	1	1.7	1.7	1.7	95.329	0.0060949	2.4874	31683000	29	1	1	1	1	1	1	1	1	1	1	1	1	1	1	1	1	1	1	1	1	1	1	1	1	18.6552	21.9152	21.6807	21.8605	21.7562	21.8621	21.4255	21.7263
	0.458466	-0.12107	B7ZCU2;B7ZCU5;B7ZCU4;B7ZCU3;B7ZCU0;J3QNK8;Q8CBW3-5;Q8CBW3-2;Q8CBW3-4;Q8CBW3-3;Q8CBW3	B7ZCU2;B7ZCU5;B7ZCU4;B7ZCU3;B7ZCU0;J3QNK8;Q8CBW3-5;Q8CBW3-2;Q8CBW3-4;Q8CBW3-3;Q8CBW3	Abl interactor 1	Abi1	10	10	8	32.3	32.3	26	43.174	0	31.898	327970000	72	9	9	10	8	10	9	9	9	10	8	8	9	7	7	8	6	8	7	7	7	8	6	6	7	25.048	24.9826	25.0354	24.9188	25.2604	25.2501	25.0112	24.9922
	0.077077	-0.0410862	B7ZNF6;E9QKH8;O35927-2;O35927;A0A2I3BQV7	B7ZNF6;E9QKH8;O35927-2;O35927	Catenin delta-2	Ctnnd2	14	14	13	20.3	20.3	19.5	132.36	0	72.552	184740000	48	11	10	9	11	10	7	9	10	10	10	11	10	10	9	8	10	9	7	8	9	9	9	10	9	24.2661	23.8146	24.3003	24.1511	24.3552	23.998	24.0201	24.2145
	0.343405	-0.0822601	B7ZNL2;Q78ZA7;A0A140LJB5;A0A140LJ37;A0A140LI78	B7ZNL2;Q78ZA7	Nucleosome assembly protein 1-like 4	Nap1l4	11	11	10	40.7	40.7	38.1	43.934	0	145.95	593580000	83	7	7	9	10	8	6	8	7	7	6	7	9	6	7	8	9	7	5	7	6	6	5	6	8	25.9298	25.8107	25.9425	25.7973	26.077	26.0555	25.7379	25.7859
	1.74354	-0.484203	B9EKJ3;Q80TL7-2;Q80TL7;A0A1W2P878	B9EKJ3;Q80TL7-2;Q80TL7;A0A1W2P878	Protein MON2 homolog	Mon2	2	2	2	1	1	1	188.35	0	3.9289	14903000	2	2	2	2	2	2	2	1	2	2	2	2	2	2	2	2	2	2	2	1	2	2	2	2	2	20.4505	20.3409	20.4306	20.8259	20.7233	21.1254	20.3461	20.4133
	0.726472	-0.22787	F6VQH5;D3YTQ3;Q9Z130	F6VQH5;D3YTQ3;Q9Z130	Heterogeneous nuclear ribonucleoprotein D-like	Hnrnpdl	5	4	4	18.3	15.8	15.8	35.534	0	19.745	61801000	24	1	1	1	1	1	1	2	4	3	2	2	3	1	1	1	1	1	1	2	4	3	2	2	3	22.6363	22.4916	22.4841	22.6879	23.0275	22.5802	22.6216	22.6264
	0.549205	-0.188343	Q3UEQ1;E9Q9A0;F6V2U0;D3YUD3;D3YUL8;D3Z230;Q9EPW0;F6R4N2;A0A0R4J0Q2;E9QAD0;Q9EPW0-2;A0A0A6YXS5	Q3UEQ1;E9Q9A0;F6V2U0;D3YUD3;D3YUL8;D3Z230;Q9EPW0;F6R4N2;A0A0R4J0Q2;E9QAD0	Type I inositol 3,4-bisphosphate 4-phosphatase	Inpp4a	5	5	5	10.3	10.3	10.3	99.971	0	24.727	116550000	43	5	4	4	5	5	5	4	5	5	5	5	4	5	4	4	5	5	5	4	5	5	5	5	4	23.3705	23.499	23.4072	23.3856	23.8881	23.568	23.2618	23.5273
	0.671663	-0.11088	D3YUT3;D3YUG3;D3Z5R8;D3Z722;Q9CZX8;S4R223	D3YUT3;D3YUG3;D3Z5R8;D3Z722;Q9CZX8;S4R223	40S ribosomal protein S19	Rps19	8	8	8	39.1	39.1	39.1	14.896	0	26.045	266450000	104	8	8	8	8	8	8	8	8	8	8	8	8	8	8	8	8	8	8	8	8	8	8	8	8	24.6702	24.7262	24.745	24.7926	24.9614	24.7201	24.7363	24.5741
	0.334169	-0.0814126	D3YUM1;Q91YT0;D3Z1U9;D3Z0K1;D3YXX5;D6RG60	D3YUM1;Q91YT0;D3Z1U9	NADH dehydrogenase [ubiquinone] flavoprotein 1, mitochondrial	Ndufv1	17	17	17	55.8	55.8	55.8	49.913	0	162.12	1557100000	312	16	14	16	15	16	13	16	15	16	16	17	16	16	14	16	15	16	13	16	15	16	16	17	16	27.2552	27.2279	27.1631	27.4306	27.109	27.3509	27.2071	27.2911
	0.494102	0.0629177	D3YUP9;Q9R1V6-19;Q9R1V6-2;Q9R1V6-18;Q9R1V6-21;Q9R1V6-20;Q9R1V6-1;Q9R1V6-9;Q9R1V6-5;Q9R1V6-4;Q9R1V6-17;Q9R1V6-16;Q9R1V6-6;Q9R1V6;Q9R1V6-7;Q9R1V6-10;Q9R1V6-13;Q9R1V6-15;Q9R1V6-8;Q9R1V6-14;Q9R1V6-11;Q9R1V6-12;D3YUQ0	D3YUP9;Q9R1V6-19;Q9R1V6-2;Q9R1V6-18;Q9R1V6-21;Q9R1V6-20;Q9R1V6-1;Q9R1V6-9;Q9R1V6-5;Q9R1V6-4;Q9R1V6-17;Q9R1V6-16;Q9R1V6-6;Q9R1V6;Q9R1V6-7;Q9R1V6-10;Q9R1V6-13;Q9R1V6-15;Q9R1V6-8;Q9R1V6-14;Q9R1V6-11;Q9R1V6-12	Disintegrin and metalloproteinase domain-containing protein 22	Adam22	6	6	6	11.7	11.7	11.7	99.558	0	55.857	203880000	37	5	4	5	3	4	2	5	4	5	6	4	5	5	4	5	3	4	2	5	4	5	6	4	5	24.3691	24.2446	24.3401	24.1744	24.3069	24.2838	24.5642	24.5338
	0.103665	-0.0820351	D3YUQ9;E9QN08;Q80T06;P57776;D3Z7N2;D3YZT9;A0A0R4J1L2;Q91VK2;A0A0R4J1E2;P57776-2;P57776-3;F6ZFU0;D3YY68	D3YUQ9;E9QN08;Q80T06;P57776;D3Z7N2;D3YZT9;A0A0R4J1L2;Q91VK2;A0A0R4J1E2;P57776-2;P57776-3;F6ZFU0	Elongation factor 1-delta	Eef1d	5	5	5	36.8	36.8	36.8	21.478	0	31	145170000	41	4	4	4	4	4	5	5	5	5	4	5	4	4	4	4	4	4	5	5	5	5	4	5	4	23.6982	23.6243	24.2303	23.9134	24.3086	23.5769	23.7367	24.0215
	0.69353	-0.0997283	Q3TDT0;D3YUY7;Q9R1R2;D3Z7V9;D3YY12	Q3TDT0;D3YUY7;Q9R1R2;D3Z7V9	Tripartite motif-containing protein 3	Trim3	6	5	5	12.1	10.6	10.6	78.271	0	27.18	50880000	26	4	3	5	3	3	1	5	4	5	4	4	3	4	3	5	3	3	1	5	4	5	4	4	3	22.1623	22.2053	22.3191	22.3681	22.2372	22.3806	21.996	22.5218
	0.00772698	-0.00334994	H3BIV5;D3YVF0	H3BIV5;D3YVF0	A-kinase anchor protein 5	Akap5	10	10	10	34.8	34.8	34.8	80.202	0	67.925	347380000	62	9	7	7	9	5	4	8	6	9	9	10	9	9	7	7	9	5	4	8	6	9	9	10	9	25.1044	24.9065	24.876	25.0821	24.7195	25.0954	25.1534	24.986
	1.32678	-0.4126	D3YVP6;Q80W21;E9QAC8;D3YVP5;P15626;D3YZ29;D3YX76;Q8R5I6;F6Y363;A2AE91;D3YVP8;D3YVP9;G5E8M7;O35660	D3YVP6;Q80W21;E9QAC8;D3YVP5;P15626;D3YZ29;D3YX76;Q8R5I6	Glutathione S-transferase Mu 7;Glutathione S-transferase Mu 2	Gstm7;Gstm2;Gstm4	6	2	2	36.5	13.3	13.3	21.328	0	4.5396	27626000	12	1	2	1	2	2	2	1	1	1	1	1	1	1	2	1	2	2	2	1	1	1	1	1	1	21.0264	21.254	20.9946	21.3948	21.7449	21.3732	21.2745	21.5295
	0.381156	-0.310794	H3BLI9;D3YW86;D3Z0V7;E9QLZ1;P62500-2;P62500-3;P62500	H3BLI9;D3YW86;D3Z0V7;E9QLZ1;P62500-2;P62500-3;P62500	TSC22 domain family protein 1	Tsc22d1	1	1	1	14	14	14	9.3584	0	15.858	30583000	23	1	1	1	1	1	1	1	1	1	1	1	1	1	1	1	1	1	1	1	1	1	1	1	1	21.0247	21.508	22.094	21.565	22.0552	21.939	21.218	21.8182
	0.318501	-0.0761484	D3YXH0;P63054	D3YXH0;P63054	Purkinje cell protein 4	Igsf5;Pcp4	3	3	3	9.1	9.1	9.1	32.627	0	30.975	209640000	73	2	3	2	2	2	2	3	2	2	3	3	3	2	3	2	2	2	2	3	2	2	3	3	3	23.324	23.4051	23.1756	23.4963	23.3869	23.25	23.8676	23.4187
	0.0763719	-0.0548999	D3YXZ3;Q91YS4;O88448;D3Z5Y7	D3YXZ3;Q91YS4;O88448	Kinesin light chain 2	Klc2	9	4	4	20.7	9.2	9.2	68.176	0	10.799	44825000	12	4	2	3	4	3	2	3	2	2	2	3	3	4	2	3	4	3	2	3	2	2	2	3	3	22.2684	21.9396	21.7763	21.676	22.3923	22.0807	21.8288	22.5632
	0.136421	0.0335426	D3YYD5;D3Z645;Q9QZ88;Q9QZ88-2;D3YW98	D3YYD5;D3Z645;Q9QZ88;Q9QZ88-2	Vacuolar protein sorting-associated protein 29	Vps29	5	5	5	54	54	54	13.723	0	26.467	125910000	33	5	5	5	5	5	5	4	4	5	4	4	5	5	5	5	5	5	5	4	4	5	4	4	5	23.6171	23.7864	23.5708	23.7496	23.5721	23.5519	23.9668	23.1802
	0.0667541	0.0332991	D3YYE1;D3Z7M9;O35381;F6UFG6	D3YYE1;D3Z7M9;O35381;F6UFG6	Acidic leucine-rich nuclear phosphoprotein 32 family member A	Anp32a	5	5	4	25.8	25.8	21.7	22.954	0	34.07	383440000	34	4	4	4	4	3	4	4	3	4	5	4	4	4	4	4	4	3	4	4	3	4	4	4	4	25.0216	24.8606	24.7327	25.0274	24.9512	24.5364	25.0102	24.9135
	0.336925	-0.137369	D3YYG8;D3Z398;D3Z252;Q3U125;Q9CYH2;D3Z0A8;D3Z143;D3YWL4	D3YYG8;D3Z398;D3Z252;Q3U125;Q9CYH2;D3Z0A8	Redox-regulatory protein FAM213A	Fam213a	4	4	4	27.6	27.6	27.6	19.626	0	16.706	120680000	25	3	3	3	2	3	3	3	3	3	3	2	4	3	3	3	2	3	3	3	3	3	3	2	4	23.2751	23.6587	23.7447	23.5238	23.7918	23.775	23.5793	24.0095
	0.453421	-0.206169	F8SLP9;D3YYH0;F8SLQ3;F8SLQ1;Q8C437;Q8C437-3;Q8C437-4	F8SLP9;D3YYH0;F8SLQ3;F8SLQ1;Q8C437;Q8C437-3;Q8C437-4	PEX5-related protein	Pex5l	10	10	10	27.5	27.5	27.5	63.138	0	28.737	137130000	26	9	7	8	7	8	6	7	4	8	9	7	5	9	7	8	7	8	6	7	4	8	9	7	5	23.4978	23.7087	23.169	23.6491	23.8749	23.47	24.4809	23.851
	0.447302	0.180957	D3YYK8;E9Q6X0;Q8R001-2;Q8R001;Q3TG90	D3YYK8;E9Q6X0;Q8R001-2;Q8R001;Q3TG90	Microtubule-associated protein RP/EB family member 2	Mapre2	4	4	4	21.9	21.9	21.9	29.425	0	45.971	254040000	43	4	4	4	4	4	4	4	4	4	4	4	4	4	4	4	4	4	4	4	4	4	4	4	4	24.6457	24.7234	24.3717	24.1543	24.6297	24.414	24.946	24.8478
	0.419098	-0.120768	D3YYM6;D3Z1S8;Q91V55;P97461	D3YYM6;D3Z1S8;Q91V55;P97461	40S ribosomal protein S5;40S ribosomal protein S5, N-terminally processed	Rps5	4	4	4	29.7	29.7	29.7	20.413	0	49.343	250890000	56	3	3	4	4	4	4	3	4	3	4	4	3	3	3	4	4	4	4	3	4	3	4	4	3	24.6575	24.5812	24.3515	24.7492	24.4895	24.7139	24.9258	24.5668
	0.146628	-0.0323671	E9Q3B9;D3YYS6;O35678;Q3UFN1;O35678-2;A0A0N4SUZ2	E9Q3B9;D3YYS6;O35678;Q3UFN1	Monoglyceride lipase	Mgll	9	9	9	44.2	44.2	44.2	35.256	0	44.336	214900000	37	9	8	7	8	8	5	7	8	6	9	8	8	9	8	7	8	8	5	7	8	6	9	8	8	24.4651	24.4351	24.4319	24.3148	24.54	24.5743	24.1605	24.4327
	0.0158662	-0.00925318	D3YYT0;P15116	D3YYT0;P15116	Cadherin-2	Cdh2	6	6	6	14.7	14.7	14.7	93.856	0	37.302	202270000	19	5	6	4	5	6	3	4	6	5	5	5	5	5	6	4	5	6	3	4	6	5	5	5	5	24.2962	23.9712	24.5493	24.4633	24.1323	24.249	24.341	24.3888
	1.08461	0.100129	D3YZ62;D3Z4J3;Q99104;F6TDE5;D6RFU0;F6Z2S4;B8JK05;A0A1L1SUF0	D3YZ62;D3Z4J3;Q99104	Unconventional myosin-Va	Myo5a	36	36	33	26.5	26.5	23.7	212.33	0	297.08	1029200000	274	28	28	26	26	28	25	25	29	25	32	29	31	26	26	24	24	26	22	23	27	23	30	27	29	26.6569	26.7827	26.6879	26.6505	26.5966	26.58	26.597	26.7098
	0.372591	-0.23727	D3YZU5;D3YZU4;D3YZU1	D3YZU5;D3YZU4;D3YZU1	SH3 and multiple ankyrin repeat domains protein 1	Shank1	6	6	6	5	5	5	225.46	0	14.85	76407000	14	6	6	6	5	5	5	3	4	5	3	4	5	6	6	6	5	5	5	3	4	5	3	4	5	22.5935	23.2132	22.7132	23.3893	23.1013	22.7412	22.746	22.8444
	0.735093	0.263408	D3Z2Q2;D3Z079;Q8K400;Q8K400-2;F6WXQ4	D3Z2Q2;D3Z079;Q8K400;Q8K400-2	Syntaxin-binding protein 5	Stxbp5	4	4	4	5.5	5.5	5.5	121.71	0	9.5529	53459000	11	4	4	3	2	3	3	3	3	3	2	2	2	4	4	3	2	3	3	3	3	3	2	2	2	22.2993	22.8253	22.5803	22.4235	22.2789	22.2122	22.5227	22.8656
	0.0254429	-0.0166594	D3Z0F5;O88545;F6QK86	D3Z0F5;O88545;F6QK86	COP9 signalosome complex subunit 6	Cops6	4	4	4	19.9	19.9	19.9	33.591	0	15.127	77060000	23	4	3	3	3	3	3	2	3	3	3	3	3	4	3	3	3	3	3	2	3	3	3	3	3	23.0999	22.7828	23.0358	22.6596	23.3404	22.9685	22.8116	22.8554
	0.561346	0.233507	D3Z0M6;O88485-2;O88485;Q3TYJ3	D3Z0M6;O88485-2;O88485;Q3TYJ3	Cytoplasmic dynein 1 intermediate chain 1	Dync1i1	4	4	4	12.7	12.7	12.7	72.889	0	40.828	72595000	30	2	3	3	2	3	2	3	2	3	4	2	4	2	3	3	2	3	2	3	2	3	4	2	4	22.9665	23.0482	22.9098	22.838	22.9937	22.3924	22.7775	22.6386
	0.505244	-0.142179	D3Z0V6;P12849	D3Z0V6;P12849	cAMP-dependent protein kinase type I-beta regulatory subunit	Prkar1b	2	1	1	11.7	7	7	28.916	0	6.8826	31653000	12	1	1	1	1	1	1	1	1	1	1	1	1	1	1	1	1	1	1	1	1	1	1	1	1	21.3856	21.4439	21.7413	21.5602	21.6917	21.7454	21.3446	21.721
	1.08319	-0.428195	D3Z1Z8;D3Z5N2;P54227;P55821	D3Z1Z8;D3Z5N2;P54227	Stathmin	Stmn1	3	3	3	33.3	33.3	33.3	11.729	0	24.327	149770000	30	2	3	3	2	3	2	3	2	2	2	3	3	2	3	3	2	3	2	3	2	2	2	3	3	23.4769	23.5953	23.729	23.695	24.1303	24.2605	23.8473	23.4082
	0.283526	-0.0990982	F7CIP8;D3Z275;Q9CQF9	F7CIP8;D3Z275;Q9CQF9	Prenylcysteine oxidase	Pcyox1	1	1	1	6.1	6.1	6.1	22.194	0	7.3315	15818000	10	1	1	1	1	1	1	1	1	1	1	1	1	1	1	1	1	1	1	1	1	1	1	1	1	20.4894	20.4286	20.7499	20.6744	20.4719	20.819	21.0661	20.5606
	1.15697	-0.383186	D3Z396;Q8BG33;Q99PJ0;F6Z2M6;F6RQ26	D3Z396;Q8BG33;Q99PJ0;F6Z2M6;F6RQ26	Neurotrimin	Ntm	4	3	3	19.6	16.5	16.5	34.954	0	114.64	168010000	84	3	3	3	3	3	3	3	3	3	3	3	3	3	3	3	3	3	3	3	3	3	3	3	3	23.8304	23.7495	23.9467	23.9378	24.3391	24.3992	23.8356	23.9507
	0.0482555	-0.037639	D3Z3A0;Q9DCL8	D3Z3A0;Q9DCL8	Protein phosphatase inhibitor 2	Ppp1r2	3	3	3	24.1	24.1	24.1	21.919	0	14.881	89507000	22	3	2	2	2	3	2	3	2	2	2	3	2	3	2	2	2	3	2	3	2	2	2	3	2	22.9493	23.5442	22.7534	22.88	23.1992	23.2805	23.0153	23.0037
	1.16796	-0.209475	D3Z3B8;E9Q9H0;H7BWY4;Q811D0-2;Q811D0;Q811D0-3;F6UDT8;S4R2T8	D3Z3B8;E9Q9H0;H7BWY4;Q811D0-2;Q811D0;Q811D0-3;F6UDT8	Disks large homolog 1	Dlg1	12	10	10	24.2	19.8	19.8	91.622	0	47.844	156250000	19	7	6	6	5	7	7	6	8	7	10	7	6	7	6	6	5	7	7	6	8	7	10	7	6	23.5853	23.8002	23.5602	23.8272	23.9303	23.8166	23.9831	23.8361
	0.814142	0.105422	D3Z3G6;Q63844;A0A0U1RPX4;D3Z6D8;A0A0U1RPZ0	D3Z3G6;Q63844;A0A0U1RPX4;D3Z6D8;A0A0U1RPZ0	Mitogen-activated protein kinase;Mitogen-activated protein kinase 3	Mapk3	10	6	6	45.3	29.5	29.5	42.401	0	43.692	248070000	64	5	6	6	5	5	5	5	6	5	6	6	6	5	6	6	5	5	5	5	6	5	6	6	6	24.5294	24.7118	24.6966	24.5637	24.5403	24.5175	24.7763	24.7841
	0.911278	-0.228799	D3Z494;G5E895;S4R2G9	D3Z494;G5E895;S4R2G9		Akr1b10	4	4	4	23.6	23.6	23.6	32.745	0	12.875	65153000	10	3	3	3	3	3	2	2	3	3	4	2	4	3	3	3	3	3	2	2	3	3	4	2	4	22.5751	22.4118	22.732	22.6785	22.928	22.7987	22.6787	22.97
	0.25034	-0.0458361	D3Z4B2;Q9CWZ7	D3Z4B2;Q9CWZ7	Gamma-soluble NSF attachment protein	Napg	12	12	12	40.5	40.5	40.5	39.366	0	123.97	663330000	243	11	9	10	10	10	10	9	10	11	10	11	11	11	9	10	10	10	10	9	10	11	10	11	11	25.9407	26.1268	26.134	26.1149	26.0505	26.1736	25.9222	25.7854
	0.491554	-0.209518	D3Z5I7;E9QN98;Q6NXK7	D3Z5I7;E9QN98;Q6NXK7	Inactive dipeptidyl peptidase 10	Dpp10	6	5	5	9.9	8.9	8.9	89.99	0	15	79953000	30	2	3	4	4	5	3	2	4	3	3	4	5	2	3	4	4	5	3	2	4	3	3	4	5	22.6114	23.0826	22.9219	22.9103	23.3225	23.0116	22.5253	23.1295
	0.42152	0.150567	D3Z5R4;E9Q2D0;P0C7L0-2;P0C7L0	D3Z5R4;E9Q2D0;P0C7L0-2;P0C7L0	WAS/WASL-interacting protein family member 3	Wipf3	3	3	3	15.1	15.1	15.1	45.137	0	19.56	106040000	43	3	2	3	3	3	3	3	3	3	3	2	3	3	2	3	3	3	3	3	3	3	3	2	3	23.3657	23.4705	23.1245	23.3636	22.9731	23.1723	23.2552	23.4594
	0.651195	-0.207216	D3Z7E5;Q2NL51	D3Z7E5;Q2NL51	Glycogen synthase kinase-3 alpha	Gsk3a	7	5	5	19.3	15.6	15.6	51.245	0	30.199	88921000	26	5	3	5	5	4	3	3	5	4	2	3	3	5	3	5	5	4	3	3	5	4	2	3	3	23.3045	22.961	22.8606	23.3149	23.148	23.2847	23.1753	23.1929
	0.368043	0.0148385	D3Z7P3;D3Z7P4;D3Z7P3-2;F7B327;F6U529;F6RDM4	D3Z7P3;D3Z7P4;D3Z7P3-2	Glutaminase kidney isoform, mitochondrial	Gls	26	26	26	57.7	57.7	57.7	73.963	0	323.31	1884600000	498	22	21	22	22	20	20	23	22	23	21	22	20	22	21	22	22	20	20	23	22	23	21	22	20	27.5866	27.5984	27.583	27.598	27.5434	27.5821	27.626	27.5712
	0.661905	-0.256182	F6ZFG8;D6RGM2;Q6P6M7	F6ZFG8;D6RGM2;Q6P6M7	O-phosphoseryl-tRNA(Sec) selenium transferase	Sepsecs	1	1	1	10.4	10.4	10.4	7.4654	0.0069234	2.4459	34562000	61	1	1	1	1	1	1	1	1	1	1	1	1	1	1	1	1	1	1	1	1	1	1	1	1	21.5894	21.5836	21.8423	21.9561	21.6497	22.1781	21.9218	22.0493
	0.0064932	-0.00393105	D6RGM3;E9QK48;Q7TNG5;Q7TNG5-2	D6RGM3;E9QK48;Q7TNG5;Q7TNG5-2	Echinoderm microtubule-associated protein-like 2	Eml2	1	1	1	3.3	3.3	3.3	46.745	0	3.8675	17612000	1	1	1	1	1	1	1	1	1	1	1	1	1	1	1	1	1	1	1	1	1	1	1	1	1	20.8069	20.7639	20.3653	20.7669	20.3697	20.8112	20.8602	20.8548
	0.163874	0.135038	E0CXA0;P51859;E0CYW7	E0CXA0;P51859;E0CYW7	Hepatoma-derived growth factor	Hdgf	3	3	3	21.8	21.8	21.8	22.115	0	20.627	83115000	19	2	2	1	2	2	2	3	3	3	2	3	3	2	2	1	2	2	2	3	3	3	2	3	3	22.9203	23.2987	23.1061	23.5453	22.7725	22.602	22.8014	23.0621
	0.571251	-0.172289	E0CYJ0;E0CXA9;Q6PEB6;G8JL35	E0CYJ0;E0CXA9;Q6PEB6;G8JL35	MOB-like protein phocein	Mob4	2	2	2	15.1	15.1	15.1	21.658	0	6.8453	64475000	8	2	2	2	1	2	2	2	2	2	2	2	1	2	2	2	1	2	2	2	2	2	2	2	1	22.5062	22.6461	22.7295	22.928	22.9053	22.5654	22.7505	22.8476
	0.48164	-0.172743	E0CXD4	E0CXD4		Pcdh1	8	4	1	32.2	19.4	5.6	39.089	0	33.268	223750000	19	4	4	3	4	4	4	4	3	3	4	3	3	1	1	0	1	1	1	1	1	0	1	1	1	24.6096	24.3628	24.5157	24.8124	24.8016	24.3923	24.6016	23.8426
	0.169072	0.0282567	E0CXN5;P13707	E0CXN5;P13707	Glycerol-3-phosphate dehydrogenase [NAD(+)];Glycerol-3-phosphate dehydrogenase [NAD(+)], cytoplasmic	Gpd1	12	12	11	43.3	43.3	39.9	35.231	0	54.884	328300000	136	11	11	10	9	9	7	10	9	9	9	10	11	10	10	9	8	8	6	9	8	8	8	9	10	25.0902	24.9283	25.0248	24.9382	25.0701	24.9502	24.9314	25.09
	0.0774935	0.0531413	E0CYB9;Q6PCP5;F7BC60;F7CTF8;E0CYI3;Q6PCP5-4;Q6PCP5-3	E0CYB9;Q6PCP5;F7BC60;F7CTF8;E0CYI3;Q6PCP5-4;Q6PCP5-3	Mitochondrial fission factor	Mff	5	5	3	30.1	30.1	17.7	35.878	0	15.873	156920000	19	3	4	3	5	4	5	4	3	3	4	4	4	2	2	2	3	2	3	2	1	2	2	3	2	23.9609	24.1838	23.5769	24.1648	23.7897	23.6078	24.0142	24.1348
	0.949298	-0.16413	Q6P6I8;E0CYM8;P97797-2;P97797;A0A0R4J1Z7;E9QPT7;P97797-3;E0CX65;A2ANC1;A0A0A6YWR3;Q6F5F2;A0A0A6YYP6	Q6P6I8;E0CYM8;P97797-2;P97797;A0A0R4J1Z7;E9QPT7	Tyrosine-protein phosphatase non-receptor type substrate 1	Sirpa	10	10	10	32	32	32	55.986	0	94.081	898690000	163	8	9	8	9	8	9	9	8	8	9	9	9	8	9	8	9	8	9	9	8	8	9	9	9	26.4394	26.2662	26.2954	26.3897	26.5996	26.5041	26.2598	26.0022
	0.556686	-0.189301	F7D432;E9PWE0;E0CYV0;P23506;P23506-2;F6V9F1;E0CYF2;F6TXE3	F7D432;E9PWE0;E0CYV0;P23506;P23506-2;F6V9F1	Protein-L-isoaspartate O-methyltransferase;Protein-L-isoaspartate(D-aspartate) O-methyltransferase	Pcmt1	8	8	8	59.8	59.8	59.8	29.167	0	65.215	801120000	112	5	6	7	6	6	5	6	7	7	8	6	7	5	6	7	6	6	5	6	7	7	8	6	7	26.112	26.4052	25.9793	26.343	26.2173	26.5042	26.3727	25.9252
	0.798954	-0.124238	E0CZ27;P84244;P02301	E0CZ27;P84244;P02301	Histone H3;Histone H3.3;Histone H3.3C	H3f3a;H3f3c	4	4	1	46.2	46.2	26.9	13.322	0	86.216	3648000000	305	4	4	4	4	4	4	4	4	4	4	4	4	1	1	1	1	1	1	1	1	1	1	1	1	28.5482	28.5152	28.5977	28.763	28.7267	28.5441	28.568	28.5617
	0.53022	0.143774	F8VQ42;E0CZ72;P28740-2;P28740;P28740-1;Q8C0N1	F8VQ42;E0CZ72;P28740-2;P28740;P28740-1	Kinesin-like protein;Kinesin-like protein KIF2A	Kif2a	10	10	10	20.9	20.9	20.9	75.968	0	50.189	167280000	44	9	9	9	8	7	9	9	8	6	9	8	8	9	9	9	8	7	9	9	8	6	9	8	8	24.3525	23.9806	24.011	23.9653	23.9838	23.9636	24.0487	23.9452
	0.0409198	0.0107784	E0CZ78;P48453-2;P48453;G3X8U7;E9Q6P2	E0CZ78;P48453-2;P48453;G3X8U7;E9Q6P2	Serine/threonine-protein phosphatase;Serine/threonine-protein phosphatase 2B catalytic subunit beta isoform	Ppp3cb	16	8	8	47.9	28.1	28.1	59.074	0	119.19	601940000	173	8	7	7	7	7	8	8	7	8	7	6	7	8	7	7	7	7	8	8	7	8	7	6	7	25.9175	25.8023	26.0337	25.8722	26.0235	25.8255	25.9761	25.9813
	0.079871	0.0476341	E0CZE0;Q8VBW6	E0CZE0;Q8VBW6	NEDD8-activating enzyme E1 regulatory subunit	Nae1	3	3	3	7.8	7.8	7.8	57.619	0	24.667	50797000	17	3	2	2	3	1	2	2	1	2	3	2	1	3	2	2	3	1	2	2	1	2	3	2	1	22.1978	22.2015	22.6441	22.0073	22.3949	22.4983	22.0896	22.4215
	0.440642	-0.430389	F6U8X4;F6U6U5;F6S7W6;E9PU87;Q6P4S6-2;Q6P4S6	F6U8X4;F6U6U5;F6S7W6;E9PU87;Q6P4S6-2;Q6P4S6	Serine/threonine-protein kinase SIK3	Sik3	2	2	2	6.1	6.1	6.1	56.975	0	5.398	19848000	5	1	1	1	1	1	2	1	1	1	1	1	1	1	1	1	1	1	2	1	1	1	1	1	1	19.7773	21.1891	20.3072	20.6981	20.9263	20.9403	21.0439	21.3181
	0.77113	0.166047	E9PUC5;F6Z9E6;A0A1D5RLK2;A0A1D5RMH7;Q2PFD7-3;Q2PFD7-5;Q2PFD7-2;Q2PFD7;Q8C0E9;Q2PFD7-4	E9PUC5;F6Z9E6;A0A1D5RLK2;A0A1D5RMH7;Q2PFD7-3;Q2PFD7-5;Q2PFD7-2;Q2PFD7;Q8C0E9;Q2PFD7-4	PH and SEC7 domain-containing protein 3	Psd3	9	9	9	31.9	31.9	31.9	42.299	0	91.67	379700000	123	8	9	9	7	7	6	7	8	5	9	6	8	8	9	9	7	7	6	7	8	5	9	6	8	25.4611	25.4989	25.2816	25.362	25.2699	25.1116	25.0261	25.3584
	1.13675	-0.267556	E9PUE7;Q5SSL4;Q5SSL4-2;Q5SSL4-4;Q5SSL4-3;H3BJY3;H3BL84;Z4YN68;H3BKT3;H3BKV6;Q6PAJ1	E9PUE7;Q5SSL4;Q5SSL4-2;Q5SSL4-4;Q5SSL4-3	Active breakpoint cluster region-related protein	Abr	13	13	13	28.8	28.8	28.8	92.486	0	53.002	326620000	66	12	10	9	9	11	11	10	9	10	11	9	8	12	10	9	9	11	11	10	9	10	11	9	8	24.9312	24.8053	24.9921	24.9858	25.2574	25.2881	24.7983	25.0082
	0.00768774	-0.00104713	E9PUL5	E9PUL5	Proline-rich transmembrane protein 2	Prrt2	3	3	3	23.4	23.4	23.4	35.923	0	53.747	381560000	64	3	3	3	3	2	2	3	3	2	3	3	3	3	3	3	3	2	2	3	3	2	3	3	3	24.9525	25.0945	25.0743	25.0301	25.0442	25.0502	25.278	25.1684
	1.92715	0.151136	E9PV73;P84075;A2A7R5;A2A7R6	E9PV73;P84075;A2A7R5	Neuron-specific calcium-binding protein hippocalcin	Hpca	10	10	5	55.1	55.1	27.3	21.82	0	151	2210800000	360	10	10	10	10	10	10	10	10	10	10	10	10	5	5	5	5	5	5	5	5	5	5	5	5	27.9211	27.9445	27.871	27.7106	27.8019	27.7706	27.6327	27.6514
	0.0313551	-0.00640361	Q3TF41;Q8BSH9;E9PW66;P28656	Q3TF41;Q8BSH9;E9PW66;P28656	Nucleosome assembly protein 1-like 1	Nap1l1	8	7	7	32.3	29.6	29.6	42.732	0	62.697	365150000	69	7	5	6	7	6	5	4	7	7	7	6	5	7	5	6	7	6	5	4	7	7	7	6	5	25.0953	25.0458	25.2076	25.2164	25.103	25.0485	25.3956	25.0478
	1.39101	-0.169814	Q3TT92;E9PWE8;Q62188;D3YUS0;D3Z567	Q3TT92;E9PWE8;Q62188	Dihydropyrimidinase-related protein 3	Dpysl3	21	17	17	60.2	51.4	51.4	61.779	0	212.91	1330800000	318	15	14	14	15	16	16	14	15	16	16	15	15	15	14	14	15	16	16	14	15	16	16	15	15	26.6878	26.8843	26.7951	26.9577	26.9525	26.9664	27.0052	26.9722
	0.087676	-0.0660082	E9PWP6;Q99NE5-7;F6TZK4;F6Y0S3;F6VBV0;F6VBT9;F6VBR4;Q99NE5-6;Q99NE5-5;Q99NE5-4;Q99NE5-3;Q99NE5;A0A1W2P6S9;Q99NE5-2	E9PWP6;Q99NE5-7;F6TZK4;F6Y0S3;F6VBV0;F6VBT9;F6VBR4;Q99NE5-6;Q99NE5-5;Q99NE5-4;Q99NE5-3;Q99NE5	Regulating synaptic membrane exocytosis protein 1	Rims1	4	4	4	10	10	10	89.256	0	21.634	111700000	29	4	3	4	4	4	4	3	4	4	3	3	3	4	3	4	4	4	4	3	4	4	3	3	3	23.322	23.4138	23.8367	23.1728	23.7064	23.8912	23.5333	23.3247
	0.945253	-0.403594	E9PWY9;Q8C0C7;D6RIJ2	E9PWY9;Q8C0C7	Phenylalanine--tRNA ligase alpha subunit	Farsa	9	9	9	32.7	32.7	32.7	57.47	0	34.189	124710000	16	4	5	7	6	4	2	3	6	6	5	6	6	4	5	7	6	4	2	3	6	6	5	6	6	23.7579	23.1883	23.4017	23.6738	23.8291	24.0557	23.6462	23.3832
	1.07148	0.583043	E9PY16;Q8R2V5	E9PY16		Adap1	8	8	8	32.4	32.4	32.4	43.37	0	22.021	132720000	19	8	7	7	7	7	4	6	8	4	7	6	7	8	7	7	7	7	4	6	8	4	7	6	7	23.7561	23.9636	24.0217	23.6529	22.8552	23.4842	23.5475	23.4242
	0.0674746	0.0143299	E9QMK2;E9PYH0;Q62059-3;Q62059;E9QMK3;G3XA35;Q62059-4;Q62059-2;Q8BS97;F7B603	E9QMK2;E9PYH0;Q62059-3;Q62059;E9QMK3;G3XA35;Q62059-4;Q62059-2	Versican core protein	Vcan	7	7	7	6.7	6.7	6.7	178.5	0	71.062	436890000	76	6	7	6	7	6	6	7	7	7	7	7	6	6	7	6	7	6	6	7	7	7	7	7	6	25.099	25.3434	25.2752	25.1992	25.2464	25.229	25.7198	25.6573
	0.229671	0.039725	E9PYI8;Q9JMA1	E9PYI8;Q9JMA1	Ubiquitin carboxyl-terminal hydrolase;Ubiquitin carboxyl-terminal hydrolase 14	Usp14	8	8	8	26.2	26.2	26.2	52.318	0	24.642	109930000	24	7	6	6	6	5	3	5	5	5	5	4	5	7	6	6	6	5	3	5	5	5	5	4	5	23.3217	23.3648	23.2516	23.3141	23.3485	23.1562	23.5838	23.841
	0.240928	-0.220973	E9PYJ7;Q6ZPQ6-2;Q6ZPQ6;A0A0G2JFQ8	E9PYJ7;Q6ZPQ6-2;Q6ZPQ6	Membrane-associated phosphatidylinositol transfer protein 2	Pitpnm2	6	6	6	9.9	9.9	9.9	147.62	0	17.537	55395000	11	3	2	2	5	3	2	2	2	4	2	2	3	3	2	2	5	3	2	2	2	4	2	2	3	22.4917	22.3456	22.8734	22.165	22.9494	23.2593	22.2933	22.1314
	0.423042	0.344001	E9PZB3;E9PYL9;Q9CXW4;A2BH06	E9PZB3;E9PYL9;Q9CXW4;A2BH06	60S ribosomal protein L11	Gm5093;Gm10036;Rpl11	2	2	2	13.2	13.2	13.2	19.876	0	27.939	106380000	25	2	2	2	2	2	2	2	2	2	2	2	2	2	2	2	2	2	2	2	2	2	2	2	2	23.4783	23.6047	23.1893	23.5388	22.4534	23.248	23.2866	23.337
	1.40701	-0.522717	E9PYN1;Q8R5M8-4;Q8R5M8-3;Q8R5M8-2;Q8R5M8;E0CY16;Q8R5M8-5;Q8R5M8-7;Q8R5M8-6	E9PYN1;Q8R5M8-4;Q8R5M8-3;Q8R5M8-2;Q8R5M8;E0CY16;Q8R5M8-5;Q8R5M8-7;Q8R5M8-6	Cell adhesion molecule 1	Cadm1	6	6	6	28.9	28.9	28.9	51.688	0	64.964	453720000	107	6	5	5	6	5	6	6	5	6	5	5	6	6	5	5	6	5	6	6	5	6	5	5	6	24.8934	25.377	24.9628	25.5321	25.7688	25.5005	25.108	25.2374
	0.400472	0.0765667	E9PZ00;Q8BFQ1;K3W4L3;J3QPG5;Q61207	E9PZ00;Q8BFQ1;K3W4L3;J3QPG5;Q61207	Prosaposin	Psap	9	9	9	17.6	17.6	17.6	60.672	0	175.09	1138500000	230	8	8	8	7	8	6	8	8	7	9	8	9	8	8	8	7	8	6	8	8	7	9	8	9	26.7061	26.6887	26.9207	26.6346	26.7116	26.7396	26.8364	26.9033
	0.21241	0.097257	E9PZC3;Q923D2;E9PZC4;A0A0U1RPU7	E9PZC3;Q923D2;E9PZC4;A0A0U1RPU7	Flavin reductase (NADPH)	Blvrb	2	2	2	10.5	10.5	10.5	26.647	0.0089362	2.3411	25894000	2	2	2	2	2	2	2	2	2	2	2	2	2	2	2	2	2	2	2	2	2	2	2	2	2	21.6037	21.5601	21.09	21.2743	21.2346	21.4531	21.8916	21.3481
	1.22198	-0.232098	E9PZF0;Q01768;Q5NC80;Q5NC79	E9PZF0;Q01768;Q5NC80	Nucleoside diphosphate kinase;Nucleoside diphosphate kinase B	Gm20390;Nme2;Nme1	15	15	6	77.5	77.5	25.1	30.2	0	190.87	2949400000	606	15	15	14	13	14	15	15	14	14	15	14	13	6	6	5	5	5	6	6	5	5	6	5	4	27.8946	28.0398	28.1392	28.1734	28.2386	28.3579	28.0267	28.0053
	0.271002	-0.190506	E9PZI9;Q05D16;E9QMY1;Q80VX2;O54901	E9PZI9;Q05D16;E9QMY1;Q80VX2;O54901	OX-2 membrane glycoprotein	Cd200	3	3	3	27.1	27.1	27.1	14.307	0	11.511	149440000	18	3	3	3	3	3	3	3	3	3	3	3	3	3	3	3	3	3	3	3	3	3	3	3	3	23.6987	23.6738	24.2402	23.6445	24.3412	24.1985	23.695	24.071
	0.447663	0.281506	F7BX42;E9PZM8;Q99J85;H3BLN6;F8VQB8	F7BX42;E9PZM8;Q99J85;H3BLN6;F8VQB8	Neuronal pentraxin receptor	Nptxr;Npcd	7	7	7	24.5	24.5	24.5	52.317	0	33.001	158960000	23	6	6	6	4	4	3	3	5	5	4	6	4	6	6	6	4	4	3	3	5	5	4	6	4	24.2147	24.0593	23.6689	24.1302	23.5191	23.4491	24.0902	23.9188
	0.155898	-0.0898018	E9PZS5;Q8C163	E9PZS5;Q8C163	Nuclease EXOG, mitochondrial	Exog	5	5	5	19.9	19.9	19.9	43.61	0	13.017	70010000	19	4	5	4	3	4	3	3	4	5	4	4	4	4	5	4	3	4	3	3	4	5	4	4	4	22.3582	22.9891	22.7363	23.0052	22.7188	22.629	22.8164	22.5558
	0.625921	-0.151617	E9Q035;Q921I1;F7BAE9;F7CJN9;D3YYR8;E9Q2Q7	E9Q035;Q921I1;F7BAE9	Serotransferrin	Gm20425;Tf;Trf	13	13	13	19.1	19.1	19.1	107.8	0	108.52	401070000	95	12	11	11	12	10	11	13	10	8	11	13	12	12	11	11	12	10	11	13	10	8	11	13	12	25.275	25.0658	25.2647	25.1834	25.4444	25.4326	25.2599	25.3581
	1.17511	-0.214744	F8WGN6;E9Q0J5;Q9QXL2-3;Q9QXL2-2;Q9QXL2-4;Q9QXL2;F8VQE2;E9Q0A4;Q9QXL1;A0A2R8VJN0;A0A2R8VKM5;E9QMU1;J3QNW9;B7ZNG0-2;B7ZNG0	F8WGN6;E9Q0J5;Q9QXL2-3;Q9QXL2-2;Q9QXL2-4;Q9QXL2	Kinesin-like protein;Kinesin-like protein KIF21A	Kif21a	12	12	11	12.3	12.3	11.7	181.37	0	46.951	177710000	27	7	10	10	10	7	7	7	10	7	8	6	10	6	9	9	9	7	6	6	9	6	7	5	9	24.0127	24.0976	24.0622	24.1817	24.1984	24.4366	24.09	24.2881
	0.400033	-0.120997	E9Q0N0;Q9Z0R4;E9Q3I8;E9Q3I9;E9Q3I4;E9Q3I5;Q9Z0R4-2;CON__ENSEMBL:ENSBTAP00000001528;F6R6C8;F6U8U1;Q6NZJ5;F6ZLP6;F6TCC6;E9QNG1;B2RR82;Q9Z0R6	E9Q0N0;Q9Z0R4;E9Q3I8;E9Q3I9;E9Q3I4;E9Q3I5;Q9Z0R4-2	Intersectin-1	Itsn1	10	10	10	9.8	9.8	9.8	194.89	0	27.227	156320000	30	8	6	6	8	9	6	6	7	8	9	6	7	8	6	6	8	9	6	6	7	8	9	6	7	23.8015	24.0727	24.0242	24.1908	23.8932	24.1774	23.7606	23.6866
	0.311991	-0.108199	E9Q0W6;E9Q4K0;Q8BL65-2;Q8BL65-3;Q8BL65;Q8BL65-4;Q8BL65-5;F6VVW4;D3Z0Y4;F7A5C5;F6UI99;F6W6N3;D3YYR9	E9Q0W6;E9Q4K0;Q8BL65-2;Q8BL65-3;Q8BL65;Q8BL65-4;Q8BL65-5;F6VVW4;D3Z0Y4;F7A5C5	Actin-binding LIM protein 2	Ablim2	6	6	6	16.1	16.1	16.1	67.285	0	16.823	73056000	12	5	4	5	6	6	5	4	5	4	6	3	4	5	4	5	6	6	5	4	5	4	6	3	4	22.5826	22.5847	22.9098	22.8585	22.6225	22.9207	23.0382	23.1728
	0.120835	-0.0287774	E9Q9F5;E9Q1G8;O55131;A0A0R4J233;A0A1W2P6J7;Q8C650-2;Q8C650	E9Q9F5;E9Q1G8;O55131	Septin-7	2018-09-07	12	12	11	35.9	35.9	33.9	50.68	0	291.62	2618500000	441	11	11	12	12	12	11	12	12	12	12	12	12	10	10	11	11	11	10	11	11	11	11	11	11	27.9514	28.0415	27.7937	27.9673	28.0356	27.8701	28.005	27.978
	0.908151	-0.145553	E9Q1J7;Q99MN9;D3YZC1;A0A087WQV1	E9Q1J7;Q99MN9	Propionyl-CoA carboxylase beta chain, mitochondrial	Pccb	8	8	8	23.2	23.2	23.2	54.613	0	79.283	209590000	45	8	8	8	7	8	6	6	7	7	7	7	8	8	8	8	7	8	6	6	7	7	7	7	8	24.4413	24.2312	24.3838	24.4657	24.5786	24.4487	24.3784	24.541
	0.493163	-0.228937	E9Q1S3;Q01405;A2AN97;A2AN98;A2AN99;A2ANA0;Q9D662	E9Q1S3;Q01405	Protein transport protein Sec23A	Sec23a	6	6	6	11	11	11	82.955	0	24.631	89443000	31	6	4	4	5	5	4	5	4	4	3	6	4	6	4	4	5	5	4	5	4	4	3	6	4	22.8457	23.0321	23.1273	23.3072	22.8793	23.5054	23.0677	23.1643
	0.418401	0.203047	E9Q1X8;O08532-2;O08532-5;O08532;O08532-3;O08532-4;Q8C6Y3	E9Q1X8;O08532-2;O08532-5;O08532;O08532-3;O08532-4	Voltage-dependent calcium channel subunit alpha-2/delta-1;Voltage-dependent calcium channel subunit alpha-2-1;Voltage-dependent calcium channel subunit delta-1	Cacna2d1	15	15	15	18.8	18.8	18.8	123.2	0	63.865	211600000	34	10	7	6	10	9	8	6	9	11	10	11	11	10	7	6	10	9	8	6	9	11	10	11	11	24.3202	24.3504	24.8623	24.4141	24.0908	24.4189	24.341	24.2604
	0.802494	-0.257941	E9Q2E4;Q6GQX8	E9Q2E4;Q6GQX8		Gm15800	3	3	3	1	1	1	484.12	0	4.5934	30504000	20	1	1	2	3	2	1	1	2	3	2	2	2	1	1	2	3	2	1	1	2	3	2	2	2	21.1935	21.6729	21.5322	21.6863	21.6764	21.8097	21.1113	21.6447
	0.202521	0.171888	E9Q2W9	E9Q2W9		Actn4	15	2	2	40.3	6.6	6.6	59.897	0	4.9771	31984000	11	1	1	2	1	1	1	1	1	1	2	2	2	1	1	2	1	1	1	1	1	1	2	2	2	21.2253	22.3038	21.8758	21.8176	21.5231	21.5486	21.4252	21.698
	1.43974	0.358962	E9Q2X2;Q6P9K9;A0A087WPQ9;Q6P9K9-2;E9Q3Q4;Q8C985	E9Q2X2;Q6P9K9;A0A087WPQ9;Q6P9K9-2	Neurexin-3	Nrxn3	9	9	7	9.3	9.3	7.9	153.62	0	24.452	116360000	24	7	8	6	7	5	4	7	6	5	8	6	5	5	6	4	5	3	3	5	5	3	6	4	5	23.7011	23.8048	23.7928	23.1947	23.5702	23.4569	23.1968	23.6031
	0.402357	-0.211999	E9Q397;Q3UGX2;P15508	E9Q397;Q3UGX2;P15508	Spectrin beta chain, erythrocytic	Sptb	19	14	14	12.1	9.6	9.6	246.26	0	30.014	146960000	10	10	9	10	10	12	8	8	7	9	8	10	7	10	9	10	10	12	8	8	7	9	8	10	7	23.5534	23.5518	23.9952	23.9352	24.19	23.6112	24.1449	23.7305
	0.176587	0.0529474	E9Q3M3;O08788;E9Q586;O08788-2;D3YX34;D3Z2M9;D3YYG9	E9Q3M3;O08788;E9Q586;O08788-2;D3YX34	Dynactin subunit 1	Dctn1	24	24	24	31.2	31.2	31.2	139.76	0	162.03	645730000	170	16	15	18	20	18	15	15	20	21	20	16	18	16	15	18	20	18	15	15	20	21	20	16	18	25.7636	26.089	25.8071	25.8512	25.9109	25.7387	25.9577	26.0426
	0.442355	-0.0710011	E9Q3M9;F7B0R9	E9Q3M9		2010300C02Rik	9	8	8	15.1	14.5	14.5	125.91	0	22.516	109720000	19	5	4	5	5	4	3	5	3	3	3	4	3	5	4	5	5	4	3	5	3	3	3	4	3	23.497	23.4192	23.4224	23.3907	23.5981	23.5628	23.2593	23.3108
	0.860427	-0.408119	E9Q4G8;E9Q3Q6;Q61490;F6QH25;Q5MPX5	E9Q4G8;E9Q3Q6;Q61490;F6QH25	CD166 antigen	Alcam	6	6	6	17.8	17.8	17.8	61.9	0	42.143	124400000	74	4	4	6	5	5	5	4	4	5	5	3	4	4	4	6	5	5	5	4	4	5	5	3	4	23.2782	23.7227	23.1212	23.9582	23.8533	23.5349	23.5057	23.4841
	0.219252	0.150202	H7BX15;E9Q9Q9;E9Q3V9;Q80TR1;Q80TR1-2	H7BX15;E9Q9Q9;E9Q3V9;Q80TR1;Q80TR1-2	Latrophilin-1	Adgrl1;Lphn1	5	5	5	5.8	5.8	5.8	162.28	0	30.356	79035000	17	4	4	4	4	4	2	4	4	4	4	4	4	4	4	4	4	4	2	4	4	4	4	4	4	22.847	22.9129	23.2321	22.3698	23.1046	23.067	22.9507	22.9257
	0.314937	-0.0688	F6U7V1;E9Q401;Q80ZZ5;A0A1Y7VJP1;K3W4M2;A0A1L1SQG7;E9PZQ0	F6U7V1;E9Q401	Ryanodine receptor 2	Ryr2	28	28	26	9.1	9.1	8.5	564.73	0	75.162	252310000	39	16	19	17	16	20	14	12	19	21	14	16	19	15	17	15	14	19	13	12	18	19	12	14	17	24.5729	24.8688	24.7748	24.7811	24.797	24.8448	24.6554	24.4037
	1.33101	0.27065	E9Q4M4;Q91VN4	E9Q4M4;Q91VN4	MICOS complex subunit Mic25	Chchd6	4	4	4	24.1	24.1	24.1	26.388	0	19.016	101400000	18	4	4	4	4	4	4	4	3	4	4	4	3	4	4	4	4	4	4	4	3	4	4	4	3	23.6044	23.3492	23.6213	23.2067	23.3253	23.2311	23.3198	23.085
	0.327029	-0.107973	E9Q706;P51830	E9Q706;P51830	Adenylate cyclase type 9	Adcy9	5	5	5	7.6	7.6	7.6	124.39	0	21.222	77854000	14	3	5	3	3	4	3	4	4	4	4	3	3	3	5	3	3	4	3	4	4	4	4	3	3	23.201	22.751	22.8728	23.0881	23.0287	23.032	23.2966	22.7249
	0.329718	-0.0945727	Q5UE59;E9Q7C9;Q7TNF4;Q8CD76;O88447;Q9DBS5;F6UYN4;D3Z710;Q91W40	Q5UE59;E9Q7C9;Q7TNF4;Q8CD76;O88447	Kinesin light chain 1	Klc1	12	12	7	30.4	30.4	17.3	61.629	0	35.174	106840000	32	7	6	5	7	7	7	7	6	6	8	6	6	2	2	2	2	2	3	3	2	2	3	3	1	23.4715	23.1867	23.5362	23.4066	23.4945	23.577	22.9998	23.3977
	0.163272	-0.0827611	E9Q7K1;Q564G0;Q64520	E9Q7K1;Q564G0;Q64520	Guanylate kinase	Guk1	2	2	2	18.8	18.8	18.8	22.843	0	7.1751	19854000	4	1	1	1	1	1	2	1	1	1	2	2	1	1	1	1	1	1	2	1	1	1	2	2	1	20.739	21.0147	21.1403	20.7681	21.2787	21.0956	21.0856	20.8556
	0.608698	0.0473493	E9Q7S0;F7BQW7;D3Z656;Q8CHC4;D3Z1M7;F7CD11;F6XIX0;F6VSS8	E9Q7S0;F7BQW7;D3Z656;Q8CHC4;D3Z1M7	Synaptojanin-1	Synj1	37	37	37	38.4	38.4	38.4	144.59	0	323.31	2097300000	482	34	34	36	36	32	32	35	34	34	35	35	35	34	34	36	36	32	32	35	34	34	35	35	35	27.7344	27.665	27.7479	27.6212	27.6917	27.6924	27.7188	27.7346
	0.813027	-0.162948	F7AAP4;E9Q828;Q6Q477-2;Q6Q477	F7AAP4;E9Q828;Q6Q477-2;Q6Q477	Calcium-transporting ATPase	Atp2b4	15	6	6	17	7	7	128.56	0	50.311	166420000	56	5	5	5	5	5	3	4	5	5	6	5	5	5	5	5	5	5	3	4	5	5	6	5	5	23.922	23.7325	23.7627	23.973	24.0908	23.8423	24.1155	24.0201
	0.881893	0.384646	E9Q852;E9Q9C3;Q9QZQ1-2;Q9QZQ1;E9PYX7;D3Z7L2;D3YUD2;F7C3I9	E9Q852;E9Q9C3;Q9QZQ1-2;Q9QZQ1;E9PYX7	Afadin	Mllt4	7	7	7	5.9	5.9	5.9	204.52	0	32.221	44531000	13	5	5	3	4	5	3	3	4	6	5	4	4	5	5	3	4	5	3	3	4	6	5	4	4	21.8016	22.0489	22.4644	21.8363	21.7017	21.623	22.2108	22.5087
	0.237233	-0.0623169	E9Q855;Q3UXS0;O35609	E9Q855;Q3UXS0;O35609	Secretory carrier-associated membrane protein 3	Scamp3	2	2	2	10.2	10.2	10.2	34.515	0	18.654	38214000	22	1	1	2	1	1	2	1	1	2	1	2	1	1	1	2	1	1	2	1	1	2	1	2	1	22.0201	21.8954	21.8522	22.1418	21.984	21.829	21.4916	21.5266
	0.4473	-0.0772762	E9Q8N5;Q08EB6;Q08EB5;Q8BRT1;F7DCH5;Q8BRT1-5;A0A1L1ST22;Q8BSE7;Q8BRT1-6;A0A0A6YXZ1;E9Q6L0;J3QP81;A0A087WS18;A0A087WQF1;A0A087WQ95;A0A087WNW8;A0A087WRK0;A0A087WP42;E9QNY9;A0A087WRE8;E9QKH0;A0A087WQ31;Q80TV8-2;Q80TV8;A0A1L1SRY3;A0A0N4SUT7	E9Q8N5;Q08EB6;Q08EB5;Q8BRT1;F7DCH5	CLIP-associating protein 2	Clasp2	15	15	15	17.6	17.6	17.6	140.72	0	90.078	172030000	53	10	9	11	9	9	9	8	9	11	11	8	10	10	9	11	9	9	9	8	9	11	11	8	10	24.031	24.1652	23.9157	24.1245	24.0798	24.1395	23.9455	24.2576
	1.14684	-0.165311	E9Q8N8	E9Q8N8	Anion exchange protein	Slc4a4	18	18	2	21.1	21.1	2.5	123.08	0	125.02	991830000	192	16	14	14	16	15	16	16	16	16	16	15	16	2	2	2	2	2	2	2	2	2	2	2	2	26.3935	26.5232	26.4523	26.539	26.5963	26.7296	26.6734	26.6554
	0.0131713	0.0235373	E9Q933;Q8BK08	E9Q933;Q8BK08	Transmembrane protein 11, mitochondrial	Tmem11	1	1	1	9.1	9.1	9.1	19.808	0	6.0343	33982000	21	1	1	1	1	1	1	1	1	1	1	1	1	1	1	1	1	1	1	1	1	1	1	1	1	21.1366	21.987	21.9094	22.0214	20.6192	22.3218	21.5145	21.7457
	0.121172	0.0276992	E9Q9A3;E9QQ05;E9QLK9;Q61548-3;Q61548-2;Q61548;Q3TWS4;A0A087WSI9;A0A140LHG9	E9Q9A3;E9QQ05;E9QLK9;Q61548-3;Q61548-2;Q61548;Q3TWS4	Clathrin coat assembly protein AP180	Snap91	21	21	19	31.3	31.3	28.9	86.055	0	323.31	3096600000	470	21	17	19	17	17	18	17	19	18	18	19	19	19	15	17	15	15	16	15	17	16	16	17	17	28.3528	28.2795	28.161	28.1147	28.3161	28.2794	28.2493	28.2623
	1.34242	0.442577	E9Q9C5;P63082;D3Z3B2	E9Q9C5;P63082;D3Z3B2	V-type proton ATPase 16 kDa proteolipid subunit	Atp6v0c	2	2	2	32.7	32.7	32.7	15.265	0	38.441	209530000	48	2	2	1	1	2	1	1	1	2	1	2	1	2	2	1	1	2	1	1	1	2	1	2	1	24.3501	24.8274	24.5482	24.2681	24.0719	24.0581	24.3322	24.7685
	0.82126	-0.243422	E9QAQ5;Q9WV60	E9QAQ5;Q9WV60	Glycogen synthase kinase-3 beta	Gsk3b	8	8	6	29.8	29.8	25.6	47.989	0	62.303	322460000	91	8	8	7	7	7	7	7	7	6	7	7	7	6	6	5	5	5	5	5	5	5	6	6	5	24.9429	24.645	25.0784	25.0375	25.2058	25.1533	24.8586	24.9903
	1.62366	-0.198571	E9QB01	E9QB01		Ncam1	17	3	1	31.4	4.9	1.2	93.619	0	17.957	318520000	71	3	3	3	3	3	3	3	3	3	3	3	3	1	1	1	1	1	1	1	1	1	1	1	1	24.7675	24.8125	24.9261	25.0174	25.0922	24.9922	24.833	24.9444
	0.372787	-0.0958118	Q3UHH4;E9QKC6;Q9ESN6;D3YTN5;D3YY69;D3YZJ0	Q3UHH4;E9QKC6;Q9ESN6	Tripartite motif-containing protein 2	Trim2	12	12	11	27.9	27.9	26.4	83.315	0	89.63	241920000	54	10	9	10	10	9	4	7	8	8	8	9	8	9	8	9	9	9	4	6	7	8	8	8	8	24.3449	24.5505	24.5347	24.4584	24.5204	24.7388	24.4611	24.6105
	1.28182	-0.199858	E9QLL2;Q8BZ98-2;Q8BZ98;F2Z460;E0CXZ8	E9QLL2;Q8BZ98-2;Q8BZ98	Dynamin-3	Dnm3	24	18	14	36.4	29.4	23.4	97.272	0	86.169	484680000	100	14	12	14	13	13	14	13	13	13	12	12	13	10	8	10	9	9	10	9	9	9	8	9	9	25.3343	25.3478	25.4078	25.4257	25.6134	25.6504	25.5456	25.6261
	0.966083	-0.171008	E9QMW9;Q8BGJ5;Q922I7;P17225;Q8CB58;E9Q0W3;F7C521;F7DCW4;G8JL74;G3UXA6;Q8BHD7-2;Q8BHD7	E9QMW9;Q8BGJ5;Q922I7;P17225;Q8CB58	Polypyrimidine tract-binding protein 1	Ptbp1	3	3	3	13.9	13.9	13.9	37.148	0	3.7895	17995000	1	3	2	3	1	2	1	2	2	3	1	3	3	3	2	3	1	2	1	2	2	3	1	3	3	20.7272	20.9152	20.7086	20.8565	21.022	20.9855	20.5682	20.7773
	0.068154	0.0250861	E9QN14;F8VPQ4;Q812A2;F7D9F7;D3YZW1;Q91Z69	E9QN14;F8VPQ4;Q812A2	SLIT-ROBO Rho GTPase-activating protein 3	Srgap3	12	12	12	14.8	14.8	14.8	121.72	0	47.38	106960000	24	8	6	10	8	8	7	7	8	9	7	9	5	8	6	10	8	8	7	7	8	9	7	9	5	23.6161	23.3894	23.3977	23.2368	23.5811	23.51	23.1853	23.5049
	0.0451394	0.0285301	Q3TQZ7;Q80W82;Q8C9D4;Q80W80;E9QN59;Q61831-2;Q61831;A0A0G2JEJ8;A0A0G2JGL2;A6P3E4;Q7TSJ7;G3X8U9;Q91Y86	Q3TQZ7;Q80W82;Q8C9D4;Q80W80;E9QN59;Q61831-2;Q61831	Mitogen-activated protein kinase;Mitogen-activated protein kinase 10	Mapk10	4	4	4	18.7	18.7	18.7	48.003	0	22.723	125060000	30	4	3	4	4	4	2	3	4	3	4	4	4	4	3	4	4	4	2	3	4	3	4	4	4	23.4906	23.8824	23.2617	23.6635	23.2842	23.6014	23.5715	23.9794
	0.368348	-0.0711091	E9QNF7;Q9CPW0;A0A140LJB1	E9QNF7;Q9CPW0	Contactin-associated protein-like 2	Cntnap2	5	5	5	5.2	5.2	5.2	148.25	0	21.954	97310000	16	5	5	4	5	4	5	5	5	4	5	5	5	5	5	4	5	4	5	5	5	4	5	5	5	23.2947	23.0649	23.065	23.2148	23.2558	23.1674	23.32	23.2651
	1.10947	-0.182997	G5E8R3;E9QPD7;Q05920;A0A286YCC5	G5E8R3;E9QPD7;Q05920	Pyruvate carboxylase;Pyruvate carboxylase, mitochondrial	Pcx;Pc	21	21	21	28.4	28.4	28.4	129.7	0	171.25	1189800000	258	21	18	20	20	20	17	19	19	18	20	19	21	21	18	20	20	20	17	19	19	18	20	19	21	26.6606	26.6301	26.7929	26.795	26.9926	26.8449	26.9114	26.9389
	0.311435	-0.0814699	E9QPX3;Q9CXZ1	E9QPX3;Q9CXZ1	NADH dehydrogenase [ubiquinone] iron-sulfur protein 4, mitochondrial	Ndufs4	6	6	6	40.6	40.6	40.6	19.803	0	49.271	363380000	80	4	4	4	5	5	5	5	4	6	4	5	6	4	4	4	5	5	5	5	4	6	4	5	6	25.1897	25.1807	25.2122	25.4252	25.0698	25.332	25.1335	24.4115
	0.192277	-0.034083	F6QKK2;Q8VEH3	F6QKK2;Q8VEH3	ADP-ribosylation factor-like protein 8A	Arl8a	6	6	4	39.4	39.4	23.6	18.756	0	39.84	128390000	22	3	6	5	5	5	3	3	5	4	4	3	4	1	4	3	3	3	2	1	3	2	2	1	2	23.5578	23.688	23.7078	23.7729	23.6794	23.6034	23.3715	23.9862
	0.507134	-0.177116	F6RJV6;Q9JJK2	F6RJV6;Q9JJK2	LanC-like protein 2	Lancl2	15	15	15	45.1	45.1	45.1	49.742	0	103.02	422810000	97	11	10	12	8	11	8	9	10	10	12	9	11	11	10	12	8	11	8	9	10	10	12	9	11	24.9894	25.3801	25.3984	25.2844	25.5191	25.4958	25.3116	25.2476
	0.139115	0.036253	F6VME3;F6RT34;P04370-5;P04370-10;P04370-4;P04370-14;P04370-13;P04370;P04370-2	F6VME3;F6RT34;P04370-5;P04370-10;P04370-4;P04370-14;P04370-13;P04370	Myelin basic protein	Mbp	7	7	1	38.3	38.3	8.8	20.829	0	290.94	27828000000	1131	7	7	7	7	6	7	7	7	7	6	7	7	1	1	1	1	1	1	1	1	1	1	1	1	31.0407	31.1825	31.2422	30.975	31.2311	31.1505	31.2303	31.1727
	0.169144	0.126942	F6SFF5;Q8K1Z0	F6SFF5;Q8K1Z0	Ubiquinone biosynthesis protein COQ9, mitochondrial	Coq9	2	2	2	11.9	11.9	11.9	30.282	0	44.987	43581000	23	2	2	1	2	2	2	2	2	2	2	1	2	2	2	1	2	2	2	2	2	2	2	1	2	21.9155	21.7989	22.4253	22.0799	22.1722	21.5067	22.1867	22.5741
	0.165705	0.104104	F6SVV1;P62082	F6SVV1;P62082	40S ribosomal protein S7	Gm9493;Rps7	5	5	5	32.3	32.3	32.3	21.882	0	61.115	280570000	37	4	4	4	4	4	3	2	4	3	5	3	4	4	4	4	4	4	3	2	4	3	5	3	4	25.1325	24.77	24.8118	24.9595	25.0526	24.3898	25.0451	24.5554
	0.0579113	0.0252107	F6SZ47;P28028;F6TUC4;P28028-2;Q99N57;Q99N57-2	F6SZ47;P28028;F6TUC4;P28028-2;Q99N57;Q99N57-2	Serine/threonine-protein kinase B-raf;RAF proto-oncogene serine/threonine-protein kinase	Braf;Raf1	2	2	2	3.1	3.1	3.1	83.201	0	4.4303	12756000	3	2	1	1	1	1	1	1	1	1	1	1	1	2	1	1	1	1	1	1	1	1	1	1	1	20.3952	20.3932	20.5288	20.1818	20.6769	20.3829	20.171	20.5009
	0.326021	-0.197287	F6VQZ6;Q3UH99;Q3UH99-2	F6VQZ6;Q3UH99;Q3UH99-2	Protein shisa-6 homolog	Shisa6	2	2	2	6	6	6	56.12	0	5.709	30482000	13	1	2	1	1	1	1	1	1	2	1	2	1	1	2	1	1	1	1	1	1	2	1	2	1	21.8088	21.9959	21.6225	22.4544	21.7686	21.7961	21.1897	20.4391
	0.578002	0.140885	F6YY69;F6VW30;P68254-2;P68254	F6YY69;F6VW30;P68254-2;P68254	14-3-3 protein theta	Ywhaq	12	10	10	40.4	34	34	32.221	0	167.72	1847500000	926	10	9	10	10	10	9	10	9	10	9	10	10	10	9	10	10	10	9	10	9	10	9	10	10	27.5746	27.2996	27.5383	27.4211	27.367	27.2017	27.4549	27.3279
	0.225448	0.165322	F7CDT0;F6WMC0;P61082;G5E919	F7CDT0;F6WMC0;P61082	NEDD8-conjugating enzyme Ubc12	Ube2m	3	3	3	22.2	22.2	22.2	19.823	0	14.52	93238000	15	3	3	3	2	2	2	2	2	2	2	3	2	3	3	3	2	2	2	2	2	2	2	3	2	23.0715	23.3981	23.2771	22.547	23.41	23.2936	23.1405	23.7494
	0.0948216	-0.0401141	F6ZFT1;F8WJ64;Q9CR21	F6ZFT1;F8WJ64;Q9CR21	Acyl carrier protein;Acyl carrier protein, mitochondrial	Ndufab1	3	3	3	18.9	18.9	18.9	14.309	0	31.34	438550000	156	3	3	3	3	3	3	3	3	3	3	3	3	3	3	3	3	3	3	3	3	3	3	3	3	25.1369	25.2976	25.5334	25.1763	25.4036	25.5082	25.0014	25.4204
	1.80299	-0.193697	F6ZV59;G5E8G0;G3X9W0;Q60668-4;Q60668-3;Q60668-2;Q60668;E9Q5B6;F6SHF3;A0A0G2JFL4;Q9D3U4	F6ZV59;G5E8G0;G3X9W0;Q60668-4;Q60668-3;Q60668-2;Q60668;E9Q5B6;F6SHF3	Heterogeneous nuclear ribonucleoprotein D0	Hnrnpd	7	7	6	36.6	36.6	32.9	24.611	0	68.116	468620000	114	7	6	7	7	7	6	7	7	7	6	7	7	6	5	6	6	6	5	6	6	6	5	6	6	25.3768	25.4391	25.5317	25.6699	25.612	25.6468	25.5168	25.5514
	0.333937	-0.208868	Q8C446;F6ZYH6;P63080	Q8C446;F6ZYH6;P63080	Gamma-aminobutyric acid receptor subunit beta-3	Gabrb3	5	5	2	11.6	11.6	5.5	54.282	0	20.887	82056000	18	4	4	5	5	3	4	5	3	3	5	4	4	2	2	2	2	1	2	2	2	1	2	2	2	22.9092	22.3271	22.9925	22.7275	22.8896	23.2385	23.0182	23.1498
	0.254255	-0.196824	F7AT44;Q9QZ06;A9JEI5;Q8C5G6	F7AT44;Q9QZ06;A9JEI5;Q8C5G6	Toll-interacting protein	Tollip	4	4	4	17.4	17.4	17.4	29.948	0	21.71	94884000	29	4	4	4	4	4	4	4	3	4	3	4	4	4	4	4	4	4	4	4	3	4	3	4	4	22.6491	22.9727	22.5105	23.0152	22.3862	23.3213	23.2438	23.9748
	0.253903	-0.111449	F7B5B5;Q8VHM5;A2AW41	F7B5B5;Q8VHM5;A2AW41		Hnrnpr	10	10	6	22	22	14.7	59.626	0	22.626	141530000	28	8	7	9	6	7	7	6	6	7	8	6	8	4	3	5	3	4	4	2	3	4	5	3	4	23.9815	23.5201	23.7944	23.6583	24.0245	23.9475	23.7796	23.6988
	0.916723	0.0970325	F7BJK1	F7BJK1		Pcdh1	15	15	3	20.3	20.3	5.4	116.52	0	64.34	303400000	122	13	10	13	11	12	12	12	14	11	15	11	11	3	2	3	2	2	2	2	3	2	3	2	2	24.9271	25.0895	24.965	24.8993	24.885	24.9062	24.7473	24.6481
	0.0409098	0.0236053	G3XA66;F7C846;P47802;G3UXX9;D3Z3F4;G3XA75;D3YVW0;G3UXB5;G3UYJ5	G3XA66;F7C846;P47802;G3UXX9;D3Z3F4;G3XA75;D3YVW0	Metaxin-1	Mtx1	4	4	4	20.5	20.5	20.5	33.48	0	16.868	45631000	6	4	3	3	2	1	2	1	3	4	3	2	4	4	3	3	2	1	2	1	3	4	3	2	4	21.996	22.4467	22.3194	22.2722	21.9639	22.4552	22.0004	22.1432
	0.987082	0.179334	F7CZ64;Q8VHW2;A0A0N4SWF8	F7CZ64;Q8VHW2	Voltage-dependent calcium channel gamma subunit;Voltage-dependent calcium channel gamma-8 subunit	Cacng8	6	6	6	26	26	26	43.418	0	73.237	201710000	136	6	5	5	6	5	5	6	6	5	6	6	5	6	5	5	6	5	5	6	6	5	6	6	5	24.2807	24.3911	24.1557	24.1853	24.0076	24.0966	24.4243	23.9617
	0.257826	-0.0895182	F8VPU2;E9Q805	F8VPU2;E9Q805	FERM, RhoGEF and pleckstrin domain-containing protein 1	Farp1	8	8	8	11.7	11.7	11.7	118.87	0	66.462	137600000	54	5	5	5	5	5	4	7	5	4	5	5	4	5	5	5	5	5	4	7	5	4	5	5	4	23.9102	23.7352	23.7447	23.7528	23.768	24.1379	23.7389	23.7503
	0.0255992	0.00688744	F8VQE9;Q8VHH5;A0A1D5RMG4;Q8VHH5-2;A0A0G2JDW1;A0A0G2JER6	F8VQE9;Q8VHH5;A0A1D5RMG4;Q8VHH5-2	Arf-GAP with GTPase, ANK repeat and PH domain-containing protein 3	Agap3	5	5	4	8.5	8.5	6.7	97.694	0	73.78	139440000	41	5	5	5	5	5	4	4	5	5	5	5	5	4	4	4	4	4	3	3	4	4	4	4	4	23.8923	23.7166	23.9477	23.7885	23.7878	23.9597	23.6331	23.7982
	0.612203	-0.395068	F8WGB3;Q9CZB0	F8WGB3;Q9CZB0	Succinate dehydrogenase cytochrome b560 subunit, mitochondrial	Sdhc	2	2	2	14.8	14.8	14.8	14.51	0	15.598	113420000	41	2	2	2	2	2	2	2	2	2	2	2	2	2	2	2	2	2	2	2	2	2	2	2	2	23.666	23.6551	23.4025	24.2247	23.4171	24.2671	23.0575	22.027
	1.15616	-0.304945	F8WGT1;Q68FL4;F8WI65;Q68FL4-2;H3BKT5;H3BL31;D3YYM7;A0A0N4SUY4;E9PX77;D3YX97;F7ATQ6;D3Z2Q0	F8WGT1;Q68FL4;F8WI65;Q68FL4-2;H3BKT5	Adenosylhomocysteinase;Putative adenosylhomocysteinase 3	Ahcyl2	11	4	4	23.9	11.3	11.3	66.771	0	39.162	85083000	40	3	3	3	3	3	3	3	3	4	3	3	3	3	3	3	3	3	3	3	3	4	3	3	3	23.0882	22.7813	22.7579	23.0753	23.2954	23.1715	22.8448	23.184
	2.91225	0.570501	F8WH41;O55106;F6Z700	F8WH41;O55106	Striatin	Strn	5	5	5	14.4	14.4	14.4	69.119	0	13.503	83617000	10	4	4	4	3	3	2	3	3	3	4	4	5	4	4	4	3	3	2	3	3	3	4	4	5	23.0954	23.2336	23.1875	22.7153	22.5474	22.5423	22.7775	23.3336
	0.0634478	-0.0397383	F8WH97;G5E8E0;Q9QZB0	F8WH97;G5E8E0;Q9QZB0	Regulator of G-protein signaling 17	Rgs17	1	1	1	6.1	6.1	6.1	18.877	0.010042	2.2651	45826000	20	1	1	1	1	1	1	1	1	1	1	1	1	1	1	1	1	1	1	1	1	1	1	1	1	22.0073	22.3997	22.6084	22.1418	22.5814	22.4114	21.6978	22.1687
	0.902824	-0.0948105	Q3UHH0;F8WHB1;Q9R0K7;S4R1C4	Q3UHH0;F8WHB1;Q9R0K7;S4R1C4	Calcium-transporting ATPase;Plasma membrane calcium-transporting ATPase 2	Atp2b2	28	18	18	30.4	22.1	22.1	132.1	0	240.32	1240700000	313	16	15	15	13	15	16	15	16	16	16	16	14	16	15	15	13	15	16	15	16	16	16	16	14	26.8802	26.7589	26.8739	26.8975	26.9902	26.9096	26.75	26.9044
	0.238986	0.0870495	F8WHL2;Q8CIE6	F8WHL2;Q8CIE6	Coatomer subunit alpha;Coatomer subunit alpha;Xenin;Proxenin	Copa	11	11	11	15.3	15.3	15.3	139.41	0	20.805	87135000	7	7	6	7	7	5	6	7	6	5	7	8	4	7	6	7	7	5	6	7	6	5	7	8	4	23.1177	23.3499	22.8874	23.0425	23.1162	22.9352	22.9381	23.3188
	0.202945	-0.0555731	F8WHU8;Q9D8T7-2;Q9D8T7	F8WHU8;Q9D8T7-2;Q9D8T7	SRA stem-loop-interacting RNA-binding protein, mitochondrial	Slirp	1	1	1	27.5	27.5	27.5	11.444	0	6.1449	48363000	14	1	1	1	1	1	1	1	1	1	1	1	1	1	1	1	1	1	1	1	1	1	1	1	1	22.018	22.2337	22.3493	22.2192	22.3391	22.2095	22.1231	22.2204
	0.622695	0.122829	F8WHW6;O70161-3;O70161;O70161-2;F7C0X9;D3YUY3;F8WI18;P70182-2;P70182;P70182-3;E0CYP4;F6SMP3	F8WHW6;O70161-3;O70161;O70161-2	Phosphatidylinositol 4-phosphate 5-kinase type-1 gamma	Pip5k1c	14	14	12	29.8	29.8	26.8	75.515	0	70.951	365120000	92	12	12	13	11	11	10	8	11	10	11	10	11	10	10	11	9	9	8	6	9	8	9	8	9	25.2164	25.2669	25.405	25.0642	25.2996	25.156	25.1491	25.1464
	0.458512	-0.106506	F8WI90;P05480;D3YZ57;P39688-2;Q04736;E9Q696;P25911-2;P06240;P25911	F8WI90;P05480	Neuronal proto-oncogene tyrosine-protein kinase Src	Src	7	7	5	19.3	19.3	15.9	59.89	0	21.199	101690000	30	6	4	5	4	5	3	5	5	5	6	5	4	4	3	4	3	4	3	3	4	4	4	3	3	23.1305	23.4257	23.3454	23.3872	23.3361	23.4979	23.2052	23.5393
	0.556802	-0.268462	F8WIK0;Q8WTY4;E0CYY1;F7BWP1	F8WIK0;Q8WTY4;E0CYY1;F7BWP1	Anamorsin	Ciapin1	4	4	4	24.3	24.3	24.3	33.429	0	10.524	46354000	10	1	2	4	4	2	2	1	3	3	4	3	2	1	2	4	4	2	2	1	3	3	4	3	2	22.0931	21.8755	22.3073	22.3623	22.0587	22.6602	21.4457	21.9992
	0.34932	0.027036	F8WIR1;P18242;F6Y6L6;A0A1B0GT66	F8WIR1;P18242;F6Y6L6;A0A1B0GT66	Cathepsin D	Ctsd	8	8	8	31.2	31.2	31.2	44.215	0	70.658	367290000	88	7	7	7	7	8	6	6	6	6	8	7	7	7	7	7	7	8	6	6	6	6	8	7	7	25.109	25.1164	25.0418	25.0333	25.1044	25.0484	25.3967	25.2143
	0.609306	0.116297	F8WIT2;P14824	F8WIT2;P14824	Annexin;Annexin A6	Anxa6	12	12	12	24.9	24.9	24.9	75.288	0	58.659	215300000	55	11	9	10	11	11	11	8	8	10	8	6	7	11	9	10	11	11	11	8	8	10	8	6	7	24.8375	24.969	24.7159	24.7981	24.7312	24.6441	24.1317	24.2923
	1.21466	-0.583066	H7BXB9;F8WIU1;Q9D1K7	H7BXB9;F8WIU1;Q9D1K7	UPF0687 protein C20orf27 homolog	1700037H04Rik	1	1	1	9.9	9.9	9.9	15.773	0	5.1964	24134000	21	1	1	1	1	1	1	1	1	1	1	1	1	1	1	1	1	1	1	1	1	1	1	1	1	20.9115	20.7948	21.0192	21.0615	21.7424	21.6708	20.8351	21.612
	0.52544	-0.252654	F8WIV2;Q60854;E9PYY0;E9Q3Y1;E9Q6X2;E9Q108;E9Q0P9;K7E6F1	F8WIV2;Q60854;E9PYY0;E9Q3Y1;E9Q6X2;E9Q108;E9Q0P9;K7E6F1	Serpin B6	Serpinb6a;Serpinb6	3	3	3	8	8	8	44.774	0	9.8201	22309000	24	2	2	2	1	2	2	1	1	1	2	1	1	2	2	2	1	2	2	1	1	1	2	1	1	20.7182	21.1711	21.2015	21.0081	21.4858	21.3548	20.9581	20.8815
	0.284673	0.10132	F8WJG3;P62996	F8WJG3;P62996	Transformer-2 protein homolog beta	Tra2b	2	2	2	12.2	12.2	12.2	21.935	0.0017873	2.7742	9488600	9	1	1	1	1	1	1	2	1	1	1	1	1	1	1	1	1	1	1	2	1	1	1	1	1	20.0235	19.8125	20.0312	19.6073	20.0026	19.9533	19.893	20.2677
	0.181305	-0.0646591	F8WJK8;Q99L47;E9Q1V0;E9Q1X9	F8WJK8;Q99L47;E9Q1V0	Hsc70-interacting protein	St13	8	8	8	23.8	23.8	23.8	40.538	0	53.059	279700000	132	5	4	5	5	4	5	6	5	6	7	5	6	5	4	5	5	4	5	6	5	6	7	5	6	24.7598	24.8652	24.538	24.7507	24.6405	24.9659	24.3149	24.0216
	0.627353	0.0736847	G3UX26;Q60930;D3YZT5;A0A286YCR8;D3YUN8	G3UX26;Q60930;D3YZT5;A0A286YCR8	Voltage-dependent anion-selective channel protein 2	Vdac2	10	10	10	40.3	40.3	40.3	30.446	0	101.91	1311700000	254	9	9	9	8	9	9	9	9	10	9	10	10	9	9	9	8	9	9	9	9	10	9	10	10	27.0487	27.1319	27.1158	26.9525	27.0117	27.1113	26.8399	26.9917
	0.638696	0.166438	G3UXL2;Q9D7G0;Q9CS42	G3UXL2;Q9D7G0;Q9CS42	Ribose-phosphate pyrophosphokinase 1;Ribose-phosphate pyrophosphokinase 2	Prps1l3;Prps1;Prps2	6	6	4	21.7	21.7	15.4	34.824	0	31.09	191090000	51	5	6	4	4	5	4	4	5	5	6	5	5	3	4	2	2	3	2	2	3	3	4	3	3	24.0556	24.1589	24.0714	23.7422	23.9116	24.1328	24.6533	24.6329
	0.579944	-0.0790888	G3UYV7;P62858	G3UYV7;P62858	40S ribosomal protein S28	Rps28	2	2	2	37.5	37.5	37.5	6.3442	0	9.952	91696000	34	2	2	2	2	2	2	2	2	2	2	2	2	2	2	2	2	2	2	2	2	2	2	2	2	23.1348	23.1642	23.1118	23.3318	23.1764	23.1398	23.4477	23.1523
	0.473446	-0.087733	G3UZJ5;P67871;G3UZA4;G3UZX4;G3UXG7;G3UWU5;G3UXU2	G3UZJ5;P67871;G3UZA4;G3UZX4;G3UXG7	Casein kinase II subunit beta	Csnk2b	5	5	5	35	35	35	23.621	0	20.082	145630000	41	4	5	4	5	5	5	4	2	5	4	5	4	4	5	4	5	5	5	4	2	5	4	5	4	23.809	23.5997	23.752	23.7107	23.8803	23.8329	23.5861	23.8921
	0.827497	0.134279	G3UZM4;Q8BLQ9-3;Q8BLQ9-2;Q8BLQ9;D3Z0N3	G3UZM4;Q8BLQ9-3;Q8BLQ9-2;Q8BLQ9	Cell adhesion molecule 2	Cadm2	9	9	9	34	34	34	47.345	0	123.31	853510000	223	8	7	8	8	7	8	8	8	8	8	8	8	8	7	8	8	7	8	8	8	8	8	8	8	26.3426	26.5632	26.4823	26.4052	26.3001	26.28	26.4474	26.2682
	0.908185	-0.27238	G3UZY2;P97493	G3UZY2;P97493	Thioredoxin, mitochondrial	Txn2	1	1	1	11.5	11.5	11.5	14.099	0	6.977	49561000	3	1	1	1	1	1	1	1	1	1	1	1	1	1	1	1	1	1	1	1	1	1	1	1	1	22.0837	22.3559	21.909	22.2858	22.4281	22.4518	22.6563	22.1248
	1.03775	-0.205191	G3X8R0;Q60870	G3X8R0;Q60870	Receptor expression-enhancing protein;Receptor expression-enhancing protein 5	Reep5	2	2	2	10.6	10.6	10.6	21.447	0	3.9328	61564000	7	1	1	2	1	2	1	2	2	2	2	2	1	1	1	2	1	2	1	2	2	2	2	2	1	22.5636	22.3375	22.469	22.5305	22.7329	22.7223	22.6374	22.3634
	0.0317223	-0.0124372	G3X9G2;Q9JM52;Q9JM52-3;F7AMS7;Q5SXG1;Q5SXG3;Q9JM52-2;J3QM71;A0A0A6YVZ8;B7ZNR9;B2RUE8;A0A0A6YWR8;F8VPL5;A0A0A6YWM8;E9PVG7;A0A0A6YW53;P97820	G3X9G2;Q9JM52;Q9JM52-3;F7AMS7;Q5SXG1;Q5SXG3;Q9JM52-2	Misshapen-like kinase 1	Mink1	8	8	7	9.4	9.4	8.9	151.22	0	19.246	103990000	27	7	7	5	6	5	3	5	5	5	5	6	7	6	6	4	5	4	2	4	4	4	5	5	6	23.4499	23.2121	23.463	23.2647	23.3033	23.5943	22.9404	23.3138
	0.463513	-0.222509	Q3TCR7;G3X9G4;Q3T9X3;F8WIV5;P39054-2;P39054;G3UZZ3;G3UXX2	Q3TCR7;G3X9G4;Q3T9X3;F8WIV5;P39054-2;P39054;G3UZZ3	Dynamin-2	Dnm2	13	1	1	15.2	1.2	1.2	97.986	0	23.095	611630000	43	1	1	1	1	1	1	1	1	1	1	1	1	1	1	1	1	1	1	1	1	1	1	1	1	25.888	25.506	26.0474	25.7894	26.0822	26.2374	25.8128	25.9331
	0.117515	-0.0602055	G3X9H5;P42859-2;P42859	G3X9H5;P42859-2;P42859	Huntingtin	Htt	4	4	4	2.9	2.9	2.9	344.78	0	25.245	45624000	19	3	4	3	3	4	3	1	4	3	3	4	2	3	4	3	3	4	3	1	4	3	3	4	2	22.1535	21.9033	22.2423	21.873	22.4113	22.1955	22.0681	22.1858
	2.45518	-0.359283	Q68FL0;G5E8Y0;G3X9J1;P70414	Q68FL0;G5E8Y0;G3X9J1;P70414	Sodium/calcium exchanger 1	Slc8a1	10	10	10	17.2	17.2	17.2	106.66	0	36.66	216610000	34	7	7	8	8	7	8	8	8	8	7	8	7	7	7	8	8	7	8	8	8	8	7	8	7	24.1966	24.2504	24.164	24.5199	24.6674	24.5015	24.4071	24.5185
	0.306338	-0.156543	G3X9Q2;Q61016	G3X9Q2;Q61016	Guanine nucleotide-binding protein subunit gamma;Guanine nucleotide-binding protein G(I)/G(S)/G(O) subunit gamma-7	Gng7	3	3	3	46.4	46.4	46.4	7.6108	0	35.514	199580000	35	3	2	3	3	3	2	3	2	3	3	3	3	3	2	3	3	3	2	3	2	3	3	3	3	23.8794	23.9503	24.1985	24.094	23.8887	24.5151	24.3558	24.2418
	0.24383	-0.133532	G3X9V0;P97372	G3X9V0;P97372	Proteasome activator complex subunit 2	Psme2	1	1	1	6.9	6.9	6.9	26.159	0	5.6117	25549000	6	1	1	1	1	1	1	1	1	1	1	1	1	1	1	1	1	1	1	1	1	1	1	1	1	21.6608	21.0188	21.6012	21.5729	21.6743	21.4343	21.372	21.3995
	0.177238	0.0857258	G3X9V4;Q01097;Q01098;Q03391	G3X9V4;Q01097	Glutamate receptor ionotropic, NMDA 2B	Grin2b	7	7	6	5.9	5.9	5.3	165.99	0	19.588	122070000	10	7	6	7	5	5	6	5	6	5	5	5	5	6	5	6	5	5	6	4	5	4	5	4	5	24.0014	24.0443	23.4946	23.8282	23.6619	23.793	23.1746	23.3894
	2.11613	-0.446435	G3XA25;Q8CAY6	G3XA25;Q8CAY6	Acetyl-CoA acetyltransferase, cytosolic	Acat2	6	6	3	39.5	39.5	23.3	38.147	0	48.139	258380000	32	6	6	6	6	6	5	3	5	5	5	4	5	3	3	3	3	3	3	2	2	2	3	2	2	24.638	24.5843	24.4521	24.9234	25.1457	24.9446	24.4342	24.1976
	0.165951	-0.0649656	G3XA53;Q63912	G3XA53;Q63912	Oligodendrocyte-myelin glycoprotein	Omg	5	5	5	14.9	14.9	14.9	49.598	0	56.473	351280000	68	5	5	5	5	5	4	5	5	5	5	5	5	5	5	5	5	5	4	5	5	5	5	5	5	24.9625	25.1448	25.2001	24.967	25.1273	25.408	24.9958	25.1689
	0.995783	0.376429	G5E814;Q9D8B4	G5E814;Q9D8B4	NADH dehydrogenase [ubiquinone] 1 alpha subcomplex subunit 11	Ndufa11	4	4	4	35.7	35.7	35.7	15.115	0	18.241	182810000	45	4	4	3	4	4	4	4	4	4	4	3	3	4	4	3	4	4	4	4	4	4	4	3	3	24.0939	24.4433	24.6012	24.0396	24.1458	23.8239	24.1476	24.264
	0.706901	0.0672614	G5E829;A0A1W2P7C7;A0A1W2P867;A0A1W2P7R3;A0A1W2P6X7	G5E829	Plasma membrane calcium-transporting ATPase 1	Atp2b1	33	33	17	34.2	34.2	18.3	134.75	0	323.31	3273600000	825	31	31	31	31	29	29	31	30	31	31	31	29	15	16	16	16	15	15	16	15	16	16	16	15	28.3914	28.3211	28.3617	28.2608	28.2446	28.3669	28.3139	28.2336
	0.318998	-0.200781	G5E850;P56395;E0CY88	G5E850;P56395;E0CY88	Cytochrome b5	Cyb5a	4	4	4	56.1	56.1	56.1	11.142	0	11.388	70937000	8	4	3	2	3	3	3	3	3	3	4	3	3	4	3	2	3	3	3	3	3	3	4	3	3	22.6362	22.3315	22.7898	22.4253	22.75	23.1845	22.7409	22.8195
	0.049266	0.0266571	G5E884;O88643;S4R2K7;A0A0U1RQ87	G5E884;O88643	Non-specific serine/threonine protein kinase;Serine/threonine-protein kinase PAK 1	Pak1	11	11	8	34.4	34.4	26.1	60.607	0	88.562	409950000	71	11	9	8	9	8	9	9	10	9	11	10	9	8	7	6	6	6	6	6	7	6	8	7	6	25.3926	25.637	25.0372	25.4546	25.2901	25.2422	25.0374	24.941
	0.522137	-0.18011	G5E8R0;E9Q453;G5E8R1;E9Q455;G5E8R2;E9Q456;E9Q452;Q8BSH3;B7ZNL3;E9Q454;F8WID5;P58771-2;P58771;Q8BP43;E9Q450;E9Q448;S4R261	G5E8R0;E9Q453;G5E8R1;E9Q455;G5E8R2;E9Q456;E9Q452;Q8BSH3;B7ZNL3;E9Q454;F8WID5;P58771-2;P58771	Tropomyosin alpha-1 chain	Tpm1	11	8	8	35.5	29.4	29.4	28.343	0	102.01	331980000	125	6	6	6	8	8	7	7	7	8	7	6	7	6	6	6	8	8	7	7	7	8	7	6	7	24.7855	25.1615	24.6724	25.0314	25.0091	25.1192	24.8631	25.005
	0.569233	0.160098	H3BJU7;H3BJX8;H3BJ45;H3BJ40;H3BKH9;Q60875-5;Q60875-4;Q60875;Q60875-2;Q60875-3;H3BL15;H3BLF9;H3BJ59;H3BLJ1;H3BIX8	H3BJU7;H3BJX8;H3BJ45;H3BJ40;H3BKH9;Q60875-5;Q60875-4;Q60875;Q60875-2;Q60875-3	Rho guanine nucleotide exchange factor 2	Arhgef2	12	12	12	18.8	18.8	18.8	108.59	0	46.889	140720000	34	8	6	6	6	9	5	7	8	9	7	5	6	8	6	6	6	9	5	7	8	9	7	5	6	23.8483	24.0859	23.6573	23.731	23.6746	23.7057	23.9065	23.993
	0.268255	-0.117254	H3BKQ7;H3BJD0;H3BL28;Q7TN74;H3BJD6;Q3UXW4;Q8BMP0;H3BKE7	H3BKQ7;H3BJD0;H3BL28;Q7TN74;H3BJD6;Q3UXW4;Q8BMP0;H3BKE7		Ppp1r9a	6	6	6	10.1	10.1	10.1	107.17	0	16.527	64230000	19	4	4	6	5	2	4	3	4	4	5	2	5	4	4	6	5	2	4	3	4	4	5	2	5	22.6211	22.4723	22.2753	22.8566	22.4708	22.3931	22.3931	23.0337
	0.439518	-0.154476	H3BJZ7;Q4KUS2;H3BKY4;H3BJL3;E9Q263;A0A140LHX5;A0A140LJ69;Q9Z1N9-2;Q9Z1N9-3;Q9Z1N9;Q8K0T7	H3BJZ7;Q4KUS2	Protein unc-13 homolog A	Unc13a	9	9	9	8.4	8.4	8.4	195.83	0	42.474	130500000	24	4	6	7	8	8	4	4	6	7	7	5	6	4	6	7	8	8	4	4	6	7	7	5	6	23.5018	23.5593	23.8661	23.6293	23.7869	23.9744	23.581	23.6694
	1.61391	0.141422	H3BKH6;Q9R0P3;H3BJP2;H3BLJ9;H3BJL6;H3BK43;H3BL99;H3BJC6	H3BKH6;Q9R0P3;H3BJP2;H3BLJ9;H3BJL6;H3BK43	S-formylglutathione hydrolase	Esd	6	6	6	39	39	39	32.829	0	61.06	299090000	71	6	6	6	6	6	6	5	5	5	5	5	5	6	6	6	6	6	6	5	5	5	5	5	5	25.0458	24.9798	24.9708	24.7953	24.9045	24.8723	24.8207	24.8347
	0.436593	-0.139563	H7BX95;Q6PDM2-3;Q6PDM2-2;Q6PDM2;F7AI47;F6QXN3	H7BX95;Q6PDM2-3;Q6PDM2-2;Q6PDM2;F7AI47	Serine/arginine-rich splicing factor 1	Srsf1	6	6	6	28.1	28.1	28.1	28.329	0	20.904	146230000	46	4	4	4	4	5	3	4	4	5	5	4	4	4	4	4	4	5	3	4	4	5	5	4	4	23.6859	23.633	23.6181	23.9176	23.9237	23.5144	23.754	23.6171
	0.463049	0.256452	I1E4X7;Q9JI46;H3BLR8;B2KF67;H3BJY4	I1E4X7;Q9JI46;H3BLR8;B2KF67	Diphosphoinositol polyphosphate phosphohydrolase 1	Nudt3	4	4	4	38.4	38.4	38.4	17.828	0	27.851	176050000	41	2	2	1	3	2	3	1	1	1	1	1	2	2	2	1	3	2	3	1	1	1	1	1	2	23.8915	24.0759	24.5124	23.9626	24.1339	23.614	23.9637	24.267
	1.59836	-0.142982	I3ITR1;Q9D924;A0A286YCW6	I3ITR1;Q9D924;A0A286YCW6	Iron-sulfur cluster assembly 1 homolog, mitochondrial	AK157302;Isca1	2	2	2	19.4	19.4	19.4	14.218	0.00092807	3.269	26762000	2	2	1	2	1	2	2	2	2	1	2	2	2	2	1	2	1	2	2	2	2	1	2	2	2	21.4995	21.418	21.4807	21.5743	21.5783	21.6746	21.4235	21.0582
	0.771577	0.410922	I7HJQ9;Q9Z2C4;I7HPV7	I7HJQ9;Q9Z2C4	Myotubularin-related protein 1	Mtmr1	4	4	4	15.5	15.5	15.5	75.54	0	11.184	76706000	27	3	3	1	3	3	1	2	2	3	2	3	2	3	3	1	3	3	1	2	2	3	2	3	2	23.1838	23.0177	23.6213	22.9121	22.5535	23.1245	22.9636	22.9974
	0.110272	-0.0415649	I7HLV2;Q6ZWV3;P86048;A0A1B0GXC3	I7HLV2;Q6ZWV3;P86048;A0A1B0GXC3	60S ribosomal protein L10;60S ribosomal protein L10-like	Rpl10;Rpl10l	4	4	4	26.4	26.4	26.4	23.072	0	46.733	223200000	49	3	4	4	4	4	4	4	4	4	4	3	4	3	4	4	4	4	4	4	4	4	4	3	4	24.2265	24.5775	24.6502	24.5929	24.5269	24.459	24.4241	24.8472
	0.469987	0.0940679	J3QMG3;Q60931	J3QMG3;Q60931	Voltage-dependent anion-selective channel protein 3	Vdac3	7	7	7	26.4	26.4	26.4	30.851	0	126.69	1007600000	152	7	7	7	7	7	7	7	7	7	6	7	7	7	7	7	7	7	7	7	7	7	6	7	7	26.6666	26.7262	26.8448	26.6327	26.5429	26.7798	26.5635	26.5928
	0.200832	0.0734342	J3QQ30;J3QPW1;P53810;F8WGG5	J3QQ30;J3QPW1;P53810;F8WGG5	Phosphatidylinositol transfer protein alpha isoform	Pitpna	6	6	4	25.8	25.8	19.6	31.837	0	34.269	203270000	60	6	5	5	5	5	4	6	6	5	6	6	6	4	3	3	3	3	3	4	4	4	4	4	4	24.51	24.4358	24.0657	24.2035	24.2799	24.3078	24.3383	24.3207
	0.44066	-0.144421	K3W4Q8;P18572-2;P18572;J3QP71	K3W4Q8;P18572-2;P18572;J3QP71	Basigin	Bsg	6	6	6	36.2	36.2	36.2	24.116	0	39.134	220480000	86	5	4	4	4	5	4	3	5	3	4	4	3	5	4	4	4	5	4	3	5	3	4	4	3	24.3018	24.2996	24.3562	24.1926	24.5424	24.6558	24.2233	24.7195
	0.316848	0.104284	K3W4T3;Q9Z1G4-3;Q9Z1G4-2;Q9Z1G4;A2A599;P15920;Q9JHF5;P15920-2;Q920R6	K3W4T3;Q9Z1G4-3;Q9Z1G4-2;Q9Z1G4	V-type proton ATPase subunit a;V-type proton ATPase 116 kDa subunit a isoform 1	Atp6v0a1	23	23	23	33.7	33.7	33.7	96.426	0	323.31	2404600000	507	23	19	22	21	21	19	21	19	21	17	20	20	23	19	22	21	21	19	21	19	21	17	20	20	27.8696	28.0918	27.7625	27.9157	27.6179	27.8774	27.9063	27.8613
	0.758327	-0.180352	K4DI58;Q99N28	K4DI58;Q99N28	Cell adhesion molecule 3	Cadm3	8	8	8	31.9	31.9	31.9	46.692	0	109.36	847700000	141	8	8	7	8	7	7	7	6	7	8	7	7	8	8	7	8	7	7	7	6	7	8	7	7	26.1371	26.5074	26.3401	26.552	26.4957	26.4779	26.4338	26.3302
	0.035117	-0.00847435	O08529	O08529	Calpain-2 catalytic subunit	Capn2	8	8	8	16.3	16.3	16.3	79.871	0	24.632	175140000	48	7	7	8	4	7	6	6	8	8	7	6	8	7	7	8	4	7	6	6	8	8	7	6	8	24.1541	23.9657	24.1596	24.0278	24.1995	24.0776	24.0044	24.0642
	0.777173	0.057553	O08539;Q6P1B9;O08539-2	O08539;Q6P1B9;O08539-2	Myc box-dependent-interacting protein 1	Bin1	17	17	17	38.8	38.8	38.8	64.469	0	270.87	1377300000	318	15	16	17	16	16	13	14	16	16	15	17	16	15	16	17	16	16	13	14	16	16	15	17	16	27.016	27.0378	27.1238	26.9865	27.0179	27.0005	27.0116	26.8656
	0.560421	0.0774905	O08553	O08553	Dihydropyrimidinase-related protein 2	Dpysl2	27	27	23	70.6	70.6	60.8	62.277	0	323.31	31255000000	2544	27	27	27	27	27	27	25	27	27	26	27	27	23	23	23	23	23	23	21	23	23	22	23	23	31.337	31.4421	31.5429	31.3608	31.3382	31.3905	31.4032	31.4126
	0.401068	-0.0710869	O08599;A0A140LHJ4	O08599	Syntaxin-binding protein 1	Stxbp1	33	33	1	63.5	63.5	2.5	67.568	0	323.31	13024000000	2111	31	31	32	31	32	31	32	31	32	33	31	32	1	1	1	1	1	1	1	1	1	1	1	1	30.131	30.2961	30.053	30.2656	30.1897	30.2381	30.2634	30.1835
	0.352673	0.197944	Q3TMN1;Q3UI33;O08663;M0QW69;M0QWM9;M0QW48	Q3TMN1;Q3UI33;O08663;M0QW69;M0QWM9;M0QW48	Methionine aminopeptidase 2;Methionine aminopeptidase	Metap2	4	4	4	11.2	11.2	11.2	50.526	0	8.6323	155650000	7	2	3	3	3	2	2	2	2	1	3	2	3	2	3	3	3	2	2	2	2	1	3	2	3	23.8532	24.1947	23.8929	23.8961	23.381	24.07	23.101	24.0281
	0.00485433	-0.000926971	O08749	O08749	Dihydrolipoyl dehydrogenase, mitochondrial	Dld	13	13	13	47	47	47	54.272	0	195.16	2633300000	444	12	13	13	12	13	12	11	13	13	11	13	12	12	13	13	12	13	12	11	13	13	11	13	12	27.9809	27.8942	27.9245	27.8453	28.0408	27.9162	27.9026	28.0841
	0.523542	0.10544	O08914	O08914	Fatty-acid amide hydrolase 1	Faah	7	7	7	20.9	20.9	20.9	63.221	0	21.145	167210000	39	7	7	6	7	5	5	4	5	6	6	6	6	7	7	6	7	5	5	4	5	6	6	6	6	24.2444	24.1049	24.0237	24.1133	24.0378	23.9056	24.0787	24.1457
	0.606687	-0.32384	O08915	O08915	AH receptor-interacting protein	Aip	2	2	2	10	10	10	37.605	0	6.7916	36134000	6	2	1	2	1	2	1	1	2	2	2	2	2	2	1	2	1	2	1	1	2	2	2	2	2	21.1626	21.9297	21.715	21.8221	22.0622	21.8946	21.9684	21.9376
	0.330381	0.207989	O08917;G3UYU4;G3UZZ5;G3UWW8	O08917;G3UYU4;G3UZZ5;G3UWW8	Flotillin-1	Flot1	5	5	5	18.9	18.9	18.9	47.513	0	45.506	112620000	22	4	5	5	5	5	4	2	5	4	4	3	4	4	5	5	5	5	4	2	5	4	4	3	4	23.1302	23.9683	23.6485	23.4814	23.4397	23.202	22.9068	23.4844
	0.333952	0.262707	O08997	O08997	Copper transport protein ATOX1	Atox1	2	2	2	47.1	47.1	47.1	7.3384	0	16.434	175500000	28	2	2	2	2	2	2	2	2	2	2	2	2	2	2	2	2	2	2	2	2	2	2	2	2	24.5027	24.0769	23.6965	24.2402	23.4611	23.7867	23.9331	24.3112
	1.34205	-0.218218	O09061	O09061	Proteasome subunit beta type-1	Psmb1	7	7	7	43.3	43.3	43.3	26.372	0	69.1	228810000	47	4	4	6	5	7	6	4	6	6	3	6	7	4	4	6	5	7	6	4	6	6	3	6	7	24.4274	24.3412	24.2786	24.5085	24.6925	24.5009	24.471	24.583
	0.468456	0.0631091	O09111	O09111	NADH dehydrogenase [ubiquinone] 1 beta subcomplex subunit 11, mitochondrial	Ndufb11	4	4	4	45	45	45	17.444	0	13.848	220740000	29	4	3	4	4	4	3	4	4	4	4	4	4	4	3	4	4	4	3	4	4	4	4	4	4	24.5204	24.5836	24.5114	24.5825	24.4287	24.4149	24.351	24.4394
	0.822379	-0.179857	O09131;D3Z1Q9;Q8K2Q2	O09131	Glutathione S-transferase omega-1	Gsto1	7	7	7	39.6	39.6	39.6	27.497	0	17.888	100620000	59	4	4	5	5	6	5	5	5	6	5	3	5	4	4	5	5	6	5	5	5	6	5	3	5	23.239	23.3538	23.2116	23.3207	23.6255	23.3978	23.3801	23.915
	1.03759	-0.596372	Q9CQM8;O09167	Q9CQM8;O09167	60S ribosomal protein L21	Rpl21	1	1	1	9.4	9.4	9.4	18.579	0	8.7834	71856000	22	1	1	1	1	1	1	1	1	1	1	1	1	1	1	1	1	1	1	1	1	1	1	1	1	22.2201	22.7308	23.0927	23.0937	23.4016	23.3376	22.7612	22.9031
	0.332775	-0.0845877	O35129;F6QPR1;F6Q8V7	O35129;F6QPR1;F6Q8V7	Prohibitin-2	Phb2	10	10	10	41.8	41.8	41.8	33.296	0	48.479	604580000	123	9	9	9	9	8	9	8	10	9	7	9	9	9	9	9	9	8	9	8	10	9	7	9	9	25.751	25.8816	25.9798	25.8774	25.8711	26.1176	25.8425	25.9163
	0.32254	0.108973	O35226;O35226-2;O35226-5;O35226-4;O35226-3;F7AI87	O35226;O35226-2;O35226-5;O35226-4;O35226-3	26S proteasome non-ATPase regulatory subunit 4	Psmd4	3	3	3	12	12	12	40.703	0	9.6607	76698000	20	2	2	3	2	2	2	2	2	2	2	2	3	2	2	3	2	2	2	2	2	2	2	2	3	22.8173	22.8177	23.0659	22.6515	23.011	22.7113	22.7585	22.5332
	0.279864	-0.0912221	Q497W9;O35286;A0A0G2JG10;A0A0G2JGQ5	Q497W9;O35286;A0A0G2JG10	Pre-mRNA-splicing factor ATP-dependent RNA helicase DHX15	Dhx15	3	3	3	6.7	6.7	6.7	79.97	0	5.8698	33415000	1	2	2	2	2	2	2	2	2	3	2	2	2	2	2	2	2	2	2	2	2	3	2	2	2	21.8842	21.5662	21.682	21.6297	21.8297	21.9466	21.544	21.6438
	0.443768	0.179309	O35295	O35295	Transcriptional activator protein Pur-beta	Purb	3	3	3	14.8	14.8	14.8	33.901	0	8.5272	85243000	11	3	3	2	3	3	3	3	3	3	3	3	3	3	3	2	3	3	3	3	3	3	3	3	3	23.4315	23.0763	22.8848	23.0746	22.8443	22.9357	23.2893	22.9849
	0.436385	-0.246918	O35449	O35449	Proline-rich transmembrane protein 1	Prrt1	3	3	3	19.3	19.3	19.3	31.389	0	10.577	58575000	9	2	2	2	2	2	2	2	2	2	3	2	2	2	2	2	2	2	2	2	2	2	3	2	2	22.3525	21.9341	22.6606	22.6014	22.3376	22.7489	22.3696	22.2701
	0.0119457	-0.00694084	O35465;O35465-2;F6WP10	O35465;O35465-2	Peptidyl-prolyl cis-trans isomerase FKBP8	Fkbp8	3	3	3	11.7	11.7	11.7	43.528	0	10.729	42426000	5	3	3	3	3	3	2	2	2	3	3	2	2	3	3	3	3	3	2	2	2	3	3	2	2	22.0284	22.2962	21.7331	22.2208	21.8773	21.9805	22.2578	21.9834
	1.38327	0.257705	O35526;D6RFB9;A0A0J9YUA0;Q3TJ55;Q80W45;Q00262	O35526;D6RFB9	Syntaxin-1A	Stx1a	9	8	8	41.7	39.2	39.2	33.054	0	129.9	794430000	164	7	7	7	7	7	7	7	7	7	7	7	8	7	7	7	7	7	7	7	7	7	7	7	8	26.3587	26.4293	26.3415	26.1463	25.9639	26.2463	26.1536	26.0854
	0.138322	-0.0988954	O35633-2;O35633	O35633-2;O35633	Vesicular inhibitory amino acid transporter	Slc32a1	5	5	5	14.8	14.8	14.8	56.851	0	34.97	223020000	61	4	5	5	5	5	5	4	4	5	4	5	4	4	5	5	5	5	5	4	4	5	4	5	4	24.4411	24.0062	24.6997	24.1414	24.6414	24.6608	24.3439	24.6609
	0.187685	-0.0361722	O35643;Q5SVG5;Q5SVG4	O35643;Q5SVG5;Q5SVG4	AP-1 complex subunit beta-1	Ap1b1	31	13	13	42.7	28.1	28.1	103.93	0	123.51	686600000	182	11	9	11	11	11	10	9	9	11	12	11	10	11	9	11	11	11	10	9	9	11	12	11	10	25.9111	25.9389	25.9532	26.0417	26.0447	25.8253	26.1795	26.1541
	0.441672	0.281043	O35685	O35685	Nuclear migration protein nudC	Nudc	5	5	5	17.5	17.5	17.5	38.358	0	14.072	70434000	19	4	5	3	4	4	4	5	2	4	4	4	4	4	5	3	4	4	4	5	2	4	4	4	4	22.9843	23.0865	22.3139	22.6357	22.6442	22.2617	22.8536	22.4998
	1.02033	-0.269475	Q8C2Q7;O35737	Q8C2Q7;O35737	Heterogeneous nuclear ribonucleoprotein H;Heterogeneous nuclear ribonucleoprotein H, N-terminally processed	Hnrnph1	6	6	1	18.2	18.2	2.8	51.217	0	87.197	310110000	116	6	6	6	6	6	5	6	6	6	6	6	5	1	1	1	1	1	1	1	1	1	1	1	1	24.65	24.8438	24.7254	24.8048	25.1837	25.0391	24.8057	24.9346
	0.128697	0.121131	O35857	O35857	Mitochondrial import inner membrane translocase subunit TIM44	Timm44	4	4	4	12.4	12.4	12.4	51.091	0	16.223	35814000	10	3	4	4	4	3	3	1	2	3	2	2	3	3	4	4	4	3	3	1	2	3	2	2	3	21.3994	22.4584	21.6553	21.7812	21.4617	21.9069	21.5336	21.9212
	0.168089	-0.082517	O35864;A0A087WQA8;A0A087WQ60	O35864;A0A087WQA8	COP9 signalosome complex subunit 5	Cops5	3	3	3	12.3	12.3	12.3	37.548	0	8.7969	85530000	9	3	2	3	3	3	3	2	2	3	3	2	3	3	2	3	3	3	3	2	2	3	3	2	3	22.7811	23.143	23.3838	23.1727	23.0873	23.2954	23.0203	22.7657
	0.082859	0.0356363	Q5SSP3;O35874	Q5SSP3;O35874	Amino acid transporter;Neutral amino acid transporter A	Slc1a4	3	3	3	13.5	13.5	13.5	47.666	0	26.266	84073000	29	3	3	3	3	2	2	2	3	3	3	2	3	3	3	3	3	2	2	2	3	3	3	2	3	22.561	22.7237	22.3201	22.502	22.6658	22.33	23.0081	22.756
	0.597222	0.107313	O54774	O54774	AP-3 complex subunit delta-1	Ap3d1	15	15	15	18.3	18.3	18.3	135.08	0	50.182	284610000	44	10	10	11	10	9	6	10	13	11	11	11	10	10	10	11	10	9	6	10	13	11	11	11	10	24.8718	24.8518	24.7057	24.5807	24.757	24.7697	24.8451	24.7539
	0.312456	0.0154037	O54983	O54983	Ketimine reductase mu-crystallin	Crym	13	13	13	70	70	70	33.523	0	153.42	2759700000	541	12	12	12	12	12	10	12	13	11	12	13	11	12	12	12	12	12	10	12	13	11	12	13	11	28.1023	28.1609	28.1157	28.1216	28.0917	28.1194	27.9829	28.1517
	0.436878	-0.16455	O54984	O54984	ATPase Asna1	Asna1	6	6	6	23.9	23.9	23.9	38.822	0	17.589	128780000	32	5	4	5	5	3	3	5	5	5	6	6	5	5	4	5	5	3	3	5	5	5	6	6	5	23.2581	23.7604	23.3871	23.7493	23.5739	23.576	23.6467	23.7722
	0.00138984	0.000663122	O54991	O54991	Contactin-associated protein 1	Cntnap1	16	16	16	15.5	15.5	15.5	156.31	0	60.301	299250000	66	13	12	10	14	14	11	14	12	13	10	10	11	13	12	10	14	14	11	14	12	13	10	10	11	24.8828	24.7616	25.1525	24.7364	25.0929	24.9657	25.0358	24.9936
	0.331852	-0.11846	O55013	O55013	Trafficking protein particle complex subunit 3	Trappc3	1	1	1	4.4	4.4	4.4	20.302	0.0048077	2.5217	13457000	7	1	1	1	1	1	1	1	1	1	1	1	1	1	1	1	1	1	1	1	1	1	1	1	1	20.1073	20.4983	20.4661	20.3919	20.4057	20.6294	20.2086	20.1278
	0.777831	-0.229958	O55022	O55022	Membrane-associated progesterone receptor component 1	Pgrmc1	6	6	5	42.6	42.6	37.9	21.694	0	77.561	297950000	86	5	6	6	6	6	5	5	6	6	6	6	5	4	5	5	5	5	4	4	5	5	5	5	4	24.978	24.583	24.8989	24.9329	25.1505	25.0664	24.6696	24.4855
	0.493952	-0.164344	O55026	O55026	Ectonucleoside triphosphate diphosphohydrolase 2	Entpd2	3	3	3	7.7	7.7	7.7	54.319	0	13.293	39851000	12	3	3	2	3	3	2	3	3	3	2	3	3	3	3	2	3	3	2	3	3	3	2	3	3	21.5607	21.8351	21.9299	21.9005	22.118	21.8002	22.0642	22.259
	0.267632	0.0867252	O55042;O55042-2	O55042;O55042-2	Alpha-synuclein	Snca	8	8	6	72.9	72.9	65	14.485	0	323.31	4454500000	478	7	7	8	8	8	7	7	7	8	8	8	8	5	5	6	6	6	5	5	5	6	6	6	6	28.7592	28.7992	28.6661	28.8606	28.4338	28.6698	28.6271	28.7714
	1.02477	0.506453	O55100-2;O55100	O55100-2;O55100	Synaptogyrin-1	Syngr1	3	3	3	17.8	17.8	17.8	21.294	0	30.383	403710000	63	3	3	3	3	3	3	3	3	3	3	3	3	3	3	3	3	3	3	3	3	3	3	3	3	25.3994	25.4878	25.6944	25.312	24.6013	25.149	25.292	25.4204
	0.959308	0.22457	O55125;Q5SVG6	O55125	Protein NipSnap homolog 1	Nipsnap1	9	9	9	50	50	50	33.363	0	150.02	1036600000	173	8	8	7	7	7	7	8	8	9	9	9	9	8	8	7	7	7	7	8	8	9	9	9	9	26.7056	26.8098	26.7526	26.6671	26.6033	26.3239	26.9174	26.5204
	0.121476	0.0414696	Q7TMG8;O55126;A0A0G2JEV1	Q7TMG8;O55126	Protein NipSnap homolog 2	Gbas	7	7	7	39.9	39.9	39.9	32.898	0	39.547	380390000	51	4	5	6	5	6	3	5	6	5	6	6	4	4	5	6	5	6	3	5	6	5	6	6	4	25.4248	25.0377	25.3667	25.1796	25.2359	25.2894	25.3512	25.0144
	0.118504	-0.0518723	O55137;A0A1Y7VMZ4;Q32Q92-2;Q32Q92;Q9QYR7-2;Q9QYR7;Q91YQ6;Q6Q2Z6	O55137	Acyl-coenzyme A thioesterase 1	Acot1	7	7	2	25.3	25.3	12.2	46.135	0	19.794	86666000	33	7	7	6	7	6	3	5	4	5	4	7	6	2	2	1	2	1	0	2	0	1	1	2	1	23.2812	22.9877	22.8844	23.2753	23.1246	22.9091	23.3458	23.2135
	0.637622	0.191163	O55143;O55143-2;Q8R429;B1ATS4;B1ATS5;E9Q559;Q64518-2;Q64518-3;Q64518	O55143;O55143-2	Sarcoplasmic/endoplasmic reticulum calcium ATPase 2	Atp2a2	29	29	29	34.9	34.9	34.9	114.86	0	174.8	1287000000	442	22	24	22	25	21	18	22	23	25	26	22	22	22	24	22	25	21	18	22	23	25	26	22	22	26.8774	27.2368	26.803	26.8185	26.7643	26.7609	26.8488	26.8955
	0.196768	0.137786	O55234;Q8BTY5	O55234	Proteasome subunit beta type-5	Psmb5	5	5	5	22.7	22.7	22.7	28.532	0	14.884	74793000	54	4	4	5	2	5	2	4	4	4	5	4	4	4	4	5	2	5	2	4	4	4	5	4	4	23.5166	22.858	22.756	22.9804	22.6619	23.075	22.6434	22.7316
	0.474402	0.158751	O70172;F6RJE8	O70172	Phosphatidylinositol 5-phosphate 4-kinase type-2 alpha	Pip4k2a	7	4	4	26.4	18	18	46.151	0	23.099	93232000	33	2	2	1	2	3	2	3	3	1	3	3	2	2	2	1	2	3	2	3	3	1	3	3	2	23.1512	22.9674	23.3879	23.0944	22.8521	23.0837	23.4702	23.2633
	0.0717624	-0.0357475	O70251;A0A087WS46;G3UX43;G3UZ47;M0QWK5;M0QWH8	O70251;A0A087WS46	Elongation factor 1-beta	Eef1b;Eef1b2	6	6	6	52.9	52.9	52.9	24.693	0	80.782	384240000	113	6	5	5	5	5	5	5	4	5	5	4	6	6	5	5	5	5	5	5	4	5	5	4	6	25.5068	25.0678	24.9683	25.1162	25.308	25.226	25.0979	25.2303
	0.0497817	0.038353	O70252;D3YX62;D3Z4A2	O70252;D3YX62	Heme oxygenase 2	Hmox2	4	4	4	26	26	26	35.738	0	9.9323	90099000	8	3	3	3	3	2	2	2	2	4	3	3	4	3	3	3	3	2	2	2	2	4	3	3	4	23.2224	22.7704	23.5506	22.9498	23.0708	23.4078	22.83	23.2371
	0.329063	0.0635783	O70310	O70310	Glycylpeptide N-tetradecanoyltransferase 1	Nmt1	8	8	6	26.4	26.4	21.4	56.888	0	32.028	185520000	34	7	7	6	8	6	6	5	7	7	8	7	7	5	5	5	6	5	4	4	6	5	6	6	5	24.3022	24.2959	24.4892	24.2973	24.2166	24.3828	23.9256	24.1445
	0.148604	0.0723928	Q80UE5;O70318;Q80UE4;A0A1W2P6I5;A0A1W2P896;A0A1W2P7H7;A0A1W2P7I4;A0A1W2P7I2;A0A1W2P6H2	Q80UE5;O70318;Q80UE4;A0A1W2P6I5	Band 4.1-like protein 2	Epb4.1l2;Epb41l2	14	11	11	23.5	20.4	20.4	101.81	0	78.137	318290000	115	9	8	8	9	10	8	8	9	9	10	10	9	9	8	8	9	10	8	8	9	9	10	10	9	24.8122	25.1849	24.6997	24.7596	24.6843	25.0357	25.0238	25.1181
	0.0767803	-0.0538336	O70435;E0CX62;E0CZ34;F8WH02;E0CYL6	O70435	Proteasome subunit alpha type-3	Psma3	5	5	5	21.6	21.6	21.6	28.405	0	12.201	92210000	29	3	2	2	3	2	4	2	2	4	3	2	3	3	2	2	3	2	4	2	2	4	3	2	3	22.8775	23.4853	23.5308	23.4701	23.4901	23.0949	22.858	22.5474
	0.636506	-0.215394	Q8BH40;O70439	Q8BH40;O70439	Syntaxin-7	Stx7	5	5	5	36.4	36.4	36.4	29.736	0	51.087	61685000	19	4	3	3	1	2	1	1	2	3	3	1	2	4	3	3	1	2	1	1	2	3	3	1	2	22.3542	22.6627	22.7953	22.8215	22.682	22.955	22.2712	22.6662
	0.157048	0.0466499	O70443	O70443	Guanine nucleotide-binding protein G(z) subunit alpha	Gnaz	11	11	11	40	40	40	40.849	0	60.629	367120000	128	9	9	10	9	8	7	8	9	9	8	9	9	9	9	10	9	8	7	8	9	9	8	9	9	25.109	25.3409	25.1661	25.2997	25.0009	25.1755	25.1037	25.1555
	0.051502	-0.031257	Q6ZWQ5;Q3TGS7;Q3V2H3;O70493	Q6ZWQ5;Q3TGS7;Q3V2H3;O70493	Sorting nexin-12	Snx12	4	3	3	21	16.7	16.7	18.884	0	5.1251	51200000	7	3	3	3	2	2	3	3	3	3	2	3	2	3	3	3	2	2	3	3	3	3	2	3	2	22.2893	22.2294	22.7102	22.1536	22.5919	22.5772	22.2226	22.4218
	0.226273	0.0921052	O70503;O70503-2	O70503;O70503-2	Very-long-chain 3-oxoacyl-CoA reductase	Hsd17b12	6	6	6	26.3	26.3	26.3	34.741	0	14.372	75200000	7	6	4	5	5	5	2	4	5	6	5	6	5	6	4	5	5	5	2	4	5	6	5	6	5	23.1111	22.6705	23.0894	22.943	22.9247	22.727	22.7334	22.9821
	1.07041	0.18476	O88342;A0A0J9YU05	O88342;A0A0J9YU05	WD repeat-containing protein 1	Wdr1	16	16	16	45.5	45.5	45.5	66.406	0	224.4	1191700000	328	14	13	12	14	12	11	12	15	13	14	12	13	14	13	12	14	12	11	12	15	13	14	12	13	26.9964	26.7603	26.9001	26.7773	26.6982	26.627	26.9365	26.8437
	0.120402	-0.0799255	O88507	O88507	Ciliary neurotrophic factor receptor subunit alpha	Cntfr	2	2	2	13.4	13.4	13.4	40.801	0	9.7878	43117000	7	1	2	1	1	1	1	1	2	2	1	1	1	1	2	1	1	1	1	1	2	2	1	1	1	21.5428	22.3117	21.9199	21.8158	22.0634	22.135	22.1452	21.645
	0.504439	0.120255	O88543;D3Z036;F6YCA7	O88543	COP9 signalosome complex subunit 3	Cops3	6	6	6	24.8	24.8	24.8	47.832	0	81.934	190510000	30	6	6	6	5	5	3	4	5	6	6	6	6	6	6	6	5	5	3	4	5	6	6	6	6	24.2088	24.3527	24.4459	24.2171	24.3502	24.0794	23.9344	24.3779
	0.147268	0.0819416	O88544;D3YV99;F6QTS1;D3Z1R9	O88544;D3YV99;F6QTS1;D3Z1R9	COP9 signalosome complex subunit 4	Cops4	7	7	7	23.6	23.6	23.6	46.284	0	20.959	99292000	28	5	5	5	3	5	5	6	4	5	5	6	5	5	5	5	3	5	5	6	4	5	5	6	5	23.3995	23.6062	23.1739	23.6292	23.0751	23.2296	23.2198	23.2058
	0.0783087	-0.0146631	O88569;O88569-3;O88569-2;A0A0N4SUM2	O88569;O88569-3;O88569-2	Heterogeneous nuclear ribonucleoproteins A2/B1	Hnrnpa2b1	14	14	14	41.6	41.6	41.6	37.402	0	211.18	1166300000	287	13	13	13	13	12	12	12	12	12	13	14	12	13	13	13	13	12	12	12	12	12	13	14	12	26.888	26.6767	26.8472	26.8434	26.812	26.8005	26.879	26.5683
	0.379453	-0.100301	O88737-2;O88737;V9GX98	O88737-2;O88737	Protein bassoon	Bsn	58	58	56	28.1	28.1	27.5	412.26	0	323.31	1721700000	409	49	43	49	49	43	42	36	40	44	50	49	46	48	43	48	47	42	41	35	39	44	49	47	45	27.3976	27.3237	27.4992	27.3426	27.6838	27.4951	27.247	27.2454
	0.669104	0.18751	O88741;O88741-2;A0A087WQZ4	O88741	Ganglioside-induced differentiation-associated protein 1	Gdap1	7	7	7	36.6	36.6	36.6	41.31	0	61.932	324940000	51	6	5	6	5	6	5	7	6	6	6	5	4	6	5	6	5	6	5	7	6	6	6	5	4	25.2093	24.8528	25.2513	24.9418	24.8955	24.9137	24.9596	24.8145
	0.11392	-0.0665614	O88844;D3YVY3;A0A087WPT4;A0A087WRS9;A0A087WRM4	O88844	Isocitrate dehydrogenase [NADP] cytoplasmic	Idh1	9	8	8	26.1	23.9	23.9	46.674	0	35.946	175070000	76	7	8	8	7	7	5	7	6	7	7	6	7	7	8	8	7	7	5	7	6	7	7	6	7	23.9282	24.4459	23.8147	24.2917	24.0923	24.0044	24.0994	23.9419
	0.0985095	-0.046381	O88851	O88851	Putative hydrolase RBBP9	Rbbp9	2	2	2	17.7	17.7	17.7	20.911	0	10.115	82833000	26	2	2	2	2	2	2	2	2	2	2	2	2	2	2	2	2	2	2	2	2	2	2	2	2	23.0184	22.9341	22.8207	23.1384	22.6535	23.1204	22.8552	23.3734
	0.127321	0.0850646	Q6XE40;O88910;B1AQF7	Q6XE40;O88910;B1AQF7	MAGUK p55 subfamily member 3	Mpp3	4	4	4	9.4	9.4	9.4	66.486	0	6.0208	61557000	21	4	4	4	4	2	3	4	4	4	4	4	3	4	4	4	4	2	3	4	4	4	4	4	3	22.6414	22.9682	22.3733	22.8574	22.6136	22.2567	22.711	22.1342
	0.750954	-0.110743	O88935;O88935-1;O88935-3	O88935;O88935-1;O88935-3	Synapsin-1	Syn1	30	30	28	68.3	68.3	64.7	74.096	0	323.31	12842000000	1961	27	27	25	28	26	29	29	28	24	28	28	27	25	25	23	26	24	27	27	26	22	26	26	25	30.0141	30.2384	30.1839	30.2653	30.2562	30.2472	30.2281	30.1348
	0.604115	-0.163798	O88958;D3Z0R5	O88958;D3Z0R5	Glucosamine-6-phosphate isomerase 1	Gnpda1	5	5	4	28.7	28.7	24.6	32.549	0	8.8106	79582000	15	5	4	5	5	4	3	4	4	5	5	5	3	4	4	4	4	3	3	3	4	4	4	4	2	22.9456	22.7713	22.8008	23.1164	22.7853	23.1073	23.2336	23.0318
	0.992631	0.353607	O89023	O89023	Tripeptidyl-peptidase 1	Tpp1	3	3	3	12.8	12.8	12.8	61.341	0	25.063	53922000	16	2	2	2	2	2	1	2	2	2	2	2	2	2	2	2	2	2	1	2	2	2	2	2	2	22.7593	22.6642	22.9394	22.6374	22.5145	22.1502	22.4037	22.613
	0.397663	0.132321	O89053;G3UYK8;A0A0U1RPY8;D3YW57;G3UX53;D3YXM2	O89053;G3UYK8;A0A0U1RPY8	Coronin-1A;Coronin	Coro1a	10	10	10	35.8	35.8	35.8	50.989	0	204.87	907860000	194	10	10	10	10	10	10	10	10	10	9	10	10	10	10	10	10	10	10	10	10	10	9	10	10	26.8207	26.5327	26.3707	26.5199	26.3494	26.4577	26.6492	26.341
	0.039819	-0.0136604	O89112;B2KGR2	O89112;B2KGR2	LanC-like protein 1	Lancl1	8	8	8	32.3	32.3	32.3	45.341	0	31.973	293540000	61	7	7	8	7	7	6	6	6	8	8	7	7	7	7	8	7	7	6	6	6	8	8	7	7	24.8557	24.9996	25.064	24.826	24.967	25.1673	24.7978	24.9081
	0.753795	-0.297357	P00397	P00397	Cytochrome c oxidase subunit 1	Mtco1	1	1	1	6.2	6.2	6.2	56.909	0	57.097	232650000	37	1	1	1	1	1	1	1	1	1	1	1	1	1	1	1	1	1	1	1	1	1	1	1	1	24.2503	24.5489	24.7689	24.7197	24.7177	25.0228	24.1653	24.5613
	0.156038	-0.064476	P00405	P00405	Cytochrome c oxidase subunit 2	Mtco2	6	6	6	44.9	44.9	44.9	25.976	0	229.24	4673100000	411	6	6	6	6	6	6	6	6	6	6	6	6	6	6	6	6	6	6	6	6	6	6	6	6	28.8184	28.6771	28.5545	28.879	28.8858	28.4787	28.6765	28.9857
	0.80922	-0.230368	P00493	P00493	Hypoxanthine-guanine phosphoribosyltransferase	Hprt1	10	10	10	64.2	64.2	64.2	24.57	0	94.047	453040000	105	9	10	9	9	9	8	9	8	9	8	8	9	9	10	9	9	9	8	9	8	9	8	8	9	25.11	25.5166	25.2313	25.5898	25.546	25.4132	25.4208	25.5421
	0.127623	0.0128587	P00920;A0A0A6YX78	P00920	Carbonic anhydrase 2	Ca2	11	11	11	64.6	64.6	64.6	29.032	0	209.1	2610100000	596	11	11	10	11	10	11	10	10	11	11	11	11	11	11	10	11	10	11	10	10	11	11	11	11	27.9259	27.8834	27.9257	27.9669	27.8697	27.8598	28.0245	27.9932
	0.0377189	0.0325445	P03899	P03899	NADH-ubiquinone oxidoreductase chain 3	Mtnd3	1	1	1	13	13	13	13.219	0	3.8979	50316000	8	1	1	1	1	1	1	1	1	1	1	1	1	1	1	1	1	1	1	1	1	1	1	1	1	22.5303	21.9398	22.8038	22.1223	22.4413	22.6127	22.1245	22.2394
	1.07065	-0.182419	P03911	P03911	NADH-ubiquinone oxidoreductase chain 4	Mtnd4	5	5	5	16.6	16.6	16.6	51.881	0	126.71	249080000	35	4	3	4	4	4	3	2	4	4	4	4	5	4	3	4	4	4	3	2	4	4	4	4	5	24.5946	24.5544	24.6277	24.7748	24.9084	24.6409	24.6489	24.5427
	0.956333	0.198456	P03921	P03921	NADH-ubiquinone oxidoreductase chain 5	Mtnd5	4	4	4	9.4	9.4	9.4	68.474	0	15.247	167640000	43	3	3	4	3	4	2	3	4	3	2	3	4	3	3	4	3	4	2	3	4	3	2	3	4	24.0269	23.96	24.0049	23.9772	23.6523	23.767	24.0144	23.8346
	0.613983	0.210636	P03930	P03930	ATP synthase protein 8	Mtatp8	2	2	2	34.3	34.3	34.3	7.7662	0	17.328	349560000	41	1	2	1	1	1	1	1	1	1	1	2	2	1	2	1	1	1	1	1	1	1	1	2	2	25.2867	25.0249	25.468	24.8951	25.1873	25.0653	24.6425	25.1865
	0.442427	0.101222	P03995-2;P03995	P03995-2;P03995	Glial fibrillary acidic protein	Gfap	17	17	17	44.9	44.9	44.9	49.364	0	180.17	1432100000	289	13	13	14	14	15	14	13	15	15	15	13	14	13	13	14	14	15	14	13	15	15	15	13	14	27.2384	27.4659	27.1577	27.1214	27.2022	27.2347	27.1343	27.0302
	0.411178	0.158501	P04925	P04925	Major prion protein	Prnp	2	2	2	16.1	16.1	16.1	27.977	0	22.505	181380000	36	2	2	1	1	1	1	1	1	1	1	1	1	2	2	1	1	1	1	1	1	1	1	1	1	23.8	23.7533	24.2472	23.692	23.8474	23.7856	23.9672	23.9078
	0.756336	-0.100731	P05063	P05063	Fructose-bisphosphate aldolase C	Aldoc	20	17	17	74.7	65	65	39.394	0	323.31	4208300000	674	16	16	16	15	15	15	15	15	15	16	15	16	16	16	16	15	15	15	15	15	15	16	15	16	28.4977	28.5628	28.3776	28.6314	28.5756	28.5333	28.6051	28.9333
	1.08673	-0.12668	P05064;A6ZI44;D3YWI1;D3Z510;A0A0U1RPN8;D3YV98;A0A0U1RPT5	P05064;A6ZI44;D3YWI1;D3Z510;A0A0U1RPN8	Fructose-bisphosphate aldolase A;Fructose-bisphosphate aldolase	Aldoa	22	22	4	83.2	83.2	23.1	39.355	0	323.31	14878000000	2909	20	21	21	20	21	20	20	20	19	19	19	22	4	4	4	4	4	4	4	4	4	4	4	4	30.1293	30.2949	30.2276	30.3934	30.3038	30.3347	30.1848	30.1107
	0.298017	0.0482451	P05132-2;P05132	P05132-2;P05132	cAMP-dependent protein kinase catalytic subunit alpha	Prkaca	6	6	3	25.1	25.1	14	39.802	0	106.48	324330000	101	6	6	5	6	6	6	6	6	6	6	6	6	3	3	2	3	3	3	3	3	3	3	3	3	25.1412	24.9983	25.0048	25.0062	25.0766	24.9166	25.1444	25.0739
	1.19419	-0.0748507	P05201;F7ALS6	P05201	Aspartate aminotransferase, cytoplasmic	Got1	26	26	26	78.5	78.5	78.5	46.247	0	323.31	6778300000	950	26	25	25	26	26	25	24	24	25	25	26	25	26	25	25	26	26	25	24	24	25	25	26	25	29.3407	29.3597	29.4023	29.4356	29.4855	29.4062	29.3762	29.3373
	1.07542	-0.155352	P05202	P05202	Aspartate aminotransferase, mitochondrial	Got2	22	22	22	64.4	64.4	64.4	47.411	0	323.31	7276800000	1150	19	20	20	20	20	20	19	19	20	19	20	19	19	20	20	20	20	20	19	19	20	19	20	19	29.2436	29.4204	29.4526	29.4916	29.5314	29.5596	29.4325	29.3415
	0.533153	0.0792872	P06745;CON__Q3ZBD7;A0A0U1RP97;A0A0U1RQ18;A0A0U1RQ72	P06745	Glucose-6-phosphate isomerase	Gpi	24	24	24	58.6	58.6	58.6	62.766	0	323.31	5837000000	904	22	23	23	23	23	21	19	23	21	23	21	23	22	23	23	23	23	21	19	23	21	23	21	23	29.0848	29.2325	29.202	29.0993	29.1735	29.0087	29.1965	29.1314
	1.02529	0.241417	Q3TQP6;P06801	Q3TQP6;P06801	Malic enzyme;NADP-dependent malic enzyme	Me1	9	9	9	30.6	30.6	30.6	61.48	0	41.913	157010000	27	8	6	7	6	5	4	4	6	7	7	7	7	8	6	7	6	5	4	4	6	7	7	7	7	23.8252	24.1868	23.998	23.725	23.7261	23.8346	23.8426	24.052
	0.271917	0.228505	P06837	P06837	Neuromodulin	Gap43	2	2	2	22.5	22.5	22.5	23.632	0	107.29	653710000	76	2	2	1	2	2	2	2	2	2	2	2	2	2	2	1	2	2	2	2	2	2	2	2	2	26.3453	25.8136	25.4172	25.8815	25.7802	25.2289	26.4409	26.0896
	3.43871	-0.33553	P07724;CON__P02768-1	P07724	Serum albumin	Alb	30	30	29	63.3	63.3	63.3	68.692	0	323.31	5926500000	846	30	30	30	30	30	30	29	29	30	27	29	30	29	29	29	29	29	29	28	28	29	26	28	29	29.0989	29.0689	29.1552	29.4748	29.4331	29.4217	29.3973	29.4375
	1.51518	0.155198	P07901;B7ZC50;A2A6A2;B7ZC49	P07901	Heat shock protein HSP 90-alpha	Hsp90aa1	34	24	24	47.7	36.3	36.3	84.787	0	323.31	3464800000	849	23	22	24	21	23	20	20	22	23	24	23	23	23	22	24	21	23	20	20	22	23	24	23	23	28.488	28.571	28.4398	28.3277	28.3986	28.3069	28.1442	28.1805
	0.182729	-0.0254733	P08113;F7C312	P08113;F7C312	Endoplasmin	Hsp90b1	23	21	21	32.3	30.5	30.5	92.475	0	113.38	616000000	222	20	16	17	15	14	11	14	16	16	19	13	16	20	16	17	15	14	11	14	16	16	19	13	16	25.7858	25.9208	25.9458	25.9213	25.9345	25.873	25.7585	25.8921
	0.437784	0.093476	P08226;A0A1B0GX15;G3UWN5;G3UZM8	P08226;A0A1B0GX15;G3UWN5	Apolipoprotein E	Apoe	9	9	9	36.7	36.7	36.7	35.866	0	68.151	399290000	195	8	8	8	9	8	7	8	7	7	8	8	8	8	8	8	9	8	7	8	7	7	8	8	8	25.3494	25.3154	25.4969	25.225	25.439	25.2173	25.2411	25.419
	0.0132423	0.00532087	P08228	P08228	Superoxide dismutase [Cu-Zn]	Sod1	5	5	5	39	39	39	15.942	0	57.449	2789000000	307	5	5	5	5	5	5	5	5	5	5	5	5	5	5	5	5	5	5	5	5	5	5	5	5	28.1196	27.825	28.216	27.9537	28.1643	28.0267	28.2626	28.1286
	0.0130593	0.00223541	P08249;A0A0G2JF23;A0A0G2JGY4	P08249	Malate dehydrogenase, mitochondrial	Mdh2	16	16	16	58.9	58.9	58.9	35.611	0	323.31	16372000000	1099	14	14	14	14	15	15	14	14	14	16	14	14	14	14	14	14	15	15	14	14	14	16	14	14	30.4514	30.6291	30.4963	30.5523	30.5298	30.4881	30.6107	30.7488
	0.210679	0.165451	Q8BGR3;P08414	Q8BGR3;P08414	Calcium/calmodulin-dependent protein kinase type IV	Camk4	4	4	4	13.6	13.6	13.6	52.542	0	15.843	34419000	2	3	1	3	2	2	2	2	2	4	3	3	3	3	1	3	2	2	2	2	2	4	3	3	3	21.5665	21.6067	21.7492	21.6445	20.8935	21.8881	21.6009	21.5335
	0.366696	0.0402075	P08551	P08551	Neurofilament light polypeptide	Nefl	24	24	22	50.6	50.6	47	61.508	0	318.58	2253400000	580	20	21	21	20	20	20	21	20	21	21	21	22	18	19	19	18	18	18	19	19	19	19	19	20	27.7297	27.6592	27.7512	27.669	27.7382	27.6122	27.7809	27.8188
	0.326069	0.0262871	P08752;A0A0A6YWA9;A2AE32;P20612;Q3V3I2;P50149;F6QPU5	P08752;A0A0A6YWA9	Guanine nucleotide-binding protein G(i) subunit alpha-2	Gnai2	14	11	9	47.3	38.3	32.4	40.489	0	120.25	383910000	142	9	7	8	9	9	7	9	8	7	8	8	8	7	5	6	7	7	5	7	6	5	6	6	6	25.3042	25.2656	25.193	25.2175	25.2285	25.238	25.3666	25.2217
	0.426897	-0.0394459	P09103;E9Q8G8	P09103	Protein disulfide-isomerase	P4hb	9	9	9	26.1	26.1	26.1	57.058	0	65.937	202050000	58	8	7	7	6	7	8	8	7	6	7	6	6	8	7	7	6	7	8	8	7	6	7	6	6	24.1424	24.1759	24.2466	24.2002	24.2772	24.2058	24.2748	24.4439
	0.248206	-0.0716705	P09405	P09405	Nucleolin	Ncl	11	11	11	17.4	17.4	17.4	76.722	0	42.394	189300000	61	10	10	10	9	8	8	8	9	8	7	9	5	10	10	10	9	8	8	8	9	8	7	9	5	24.1143	24.223	24.0018	24.0002	24.2387	24.3151	24.1735	24.2651
	0.0249401	-0.00458145	P09411;S4R2M7;P09041	P09411;S4R2M7	Phosphoglycerate kinase 1;Phosphoglycerate kinase	Pgk1	27	27	27	74.6	74.6	74.6	44.55	0	323.31	7488600000	1073	25	24	27	26	25	26	25	26	25	26	24	25	25	24	27	26	25	26	25	26	25	26	24	25	29.4714	29.6062	29.504	29.5221	29.6161	29.4571	29.4311	29.3721
	0.25293	0.0875142	P09528	P09528	Ferritin heavy chain;Ferritin heavy chain, N-terminally processed	Fth1	5	5	5	30.8	30.8	30.8	21.066	0	25.166	486280000	95	5	5	5	5	5	5	5	5	5	4	4	5	5	5	5	5	5	5	5	5	5	4	4	5	25.3101	25.5937	25.4983	25.1851	25.3918	25.5626	25.4009	25.6221
	0.120561	0.0347665	P09671	P09671	Superoxide dismutase [Mn], mitochondrial	Sod2	8	8	8	57.7	57.7	57.7	24.603	0	127.85	879320000	182	8	8	7	7	7	7	6	7	8	6	7	7	8	8	7	7	7	7	6	7	8	6	7	7	26.5523	26.3966	26.3664	26.4561	26.523	26.2319	26.7175	26.4575
	0.790872	0.328996	P0C192;D3YZP3;D3Z2D1;Q8C031;Q99PH1	P0C192;D3YZP3;D3Z2D1	Leucine-rich repeat-containing protein 4B	Lrrc4b	4	4	4	8.7	8.7	8.7	76.155	0	5.3356	47808000	6	2	3	3	4	3	2	3	4	4	3	2	3	2	3	3	4	3	2	3	4	4	3	2	3	22.267	22.5162	22.4896	22.1465	21.7697	22.3696	22.5983	22.0154
	0.710326	0.120495	P0DN34	P0DN34			3	3	3	66.7	66.7	66.7	6.954	0	30.666	379800000	89	3	3	3	3	3	3	3	3	3	3	3	3	3	3	3	3	3	3	3	3	3	3	3	3	25.4405	25.4103	25.2847	25.1595	25.2448	25.3697	25.0743	25.0271
	0.6954	0.10801	P0DP28;P0DP27;P0DP26;Q3UKW2;Q9D6P8;A0A1Y7VK66;G3UX57;P20801	P0DP28;P0DP27;P0DP26;Q3UKW2		Calm1	13	13	13	85.2	85.2	85.2	16.837	0	323.31	9927600000	1219	12	11	12	13	13	13	13	11	12	12	13	13	12	11	12	13	13	13	13	11	12	12	13	13	29.6034	29.5081	29.6713	29.5757	29.4895	29.3936	29.6755	29.7107
	0.655563	-0.109805	P10126;D3YZ68;D3Z3I8	P10126;D3YZ68	Elongation factor 1-alpha 1	Eef1a1	17	17	9	59.7	59.7	37.7	50.113	0	323.31	5622100000	835	16	14	16	15	15	12	14	15	15	16	15	15	9	8	9	9	9	7	8	9	9	9	9	9	29.0326	28.8955	28.9925	28.9591	29.119	29.1718	28.9811	29.0573
	0.174536	-0.0972557	P10518	P10518	Delta-aminolevulinic acid dehydratase	Alad	2	2	2	10.9	10.9	10.9	36.023	0	10.236	40482000	6	1	2	1	2	2	2	1	1	2	2	2	2	1	2	1	2	2	2	1	1	2	2	2	2	22.2599	21.6857	21.617	21.854	21.9552	22.0452	22.075	21.9522
	0.986327	-0.196102	P10605	P10605	Cathepsin B;Cathepsin B light chain;Cathepsin B heavy chain	Ctsb	5	5	5	20.6	20.6	20.6	37.279	0	82.981	179700000	59	4	4	3	4	3	3	4	4	3	5	4	3	4	4	3	4	3	3	4	4	3	5	4	3	24.1891	23.9901	24.2231	24.2931	24.2529	24.4447	24.1655	24.1978
	0.108513	0.0281099	P10630;P10630-2;Q8BTU6;E9Q561;D6RJ60;D6RJ11	P10630;P10630-2;Q8BTU6;E9Q561	Eukaryotic initiation factor 4A-II;Eukaryotic initiation factor 4A-II, N-terminally processed	Eif4a2	12	12	6	40.5	40.5	23.8	46.402	0	119.65	728930000	159	12	11	11	11	12	10	11	11	12	11	11	12	6	6	5	6	6	5	6	6	6	5	5	6	26.2263	26.0782	26.2141	26.0009	26.2799	26.1536	26.1823	26.2586
	1.32432	-0.187766	P10637-2;A0A0A0MQC7;A2A5Y6;P10637	P10637-2;A0A0A0MQC7;A2A5Y6;P10637	Microtubule-associated protein tau;Microtubule-associated protein	Mapt	11	11	2	42.6	42.6	12.8	44.892	0	205.23	3353400000	342	10	10	11	11	11	11	11	10	10	9	11	10	2	2	2	2	2	2	2	2	2	1	2	1	28.335	28.2295	28.2135	28.3974	28.3882	28.5557	28.3577	28.2732
	0.649214	-0.163839	P10639	P10639	Thioredoxin	Txn	3	3	3	32.4	32.4	32.4	11.675	0	29.499	463110000	97	3	3	3	3	3	3	3	3	3	3	3	3	3	3	3	3	3	3	3	3	3	3	3	3	25.5505	25.4036	25.5437	25.542	25.5781	25.8692	25.3813	25.3379
	0.475394	-0.0718517	P10649;A2AE89;F6WHQ7;P19639	P10649;A2AE89	Glutathione S-transferase Mu 1	Gstm1	16	16	12	69.3	69.3	50	25.97	0	181.06	2766200000	483	16	16	16	16	16	15	15	16	16	16	16	16	12	12	12	12	12	11	11	12	12	12	12	12	28.0659	27.9939	28.1573	28.0675	28.2247	28.1405	28.0513	28.0582
	0.664078	-0.0912946	P10852-2;P10852;A0A0U1RPK4;A0A0U1RP98;A0A0U1RPL8;A0A0U1RPQ7	P10852-2;P10852;A0A0U1RPK4	4F2 cell-surface antigen heavy chain	Slc3a2	15	15	15	33.3	33.3	33.3	62.239	0	221.32	1415700000	319	14	15	15	15	15	13	14	15	15	15	14	14	14	15	15	15	15	13	14	15	15	15	14	14	27.1341	27.0965	27.1165	27.1934	27.3194	27.1082	27.0745	27.1278
	0.456706	-0.12159	Q8CBB6;Q8CGP2;Q8CGP1;Q6ZWY9;Q64525;Q64478;Q64475;P10854;P10853;Q8CGP2-2;P70696	Q8CBB6;Q8CGP2;Q8CGP1;Q6ZWY9;Q64525;Q64478;Q64475;P10854;P10853;Q8CGP2-2	Histone H2B;Histone H2B type 1-P;Histone H2B type 1-K;Histone H2B type 1-C/E/G;Histone H2B type 2-B;Histone H2B type 1-H;Histone H2B type 1-B;Histone H2B type 1-M;Histone H2B type 1-F/J/L	Hist1h2br;Hist1h2bp;Hist1h2bk;Hist1h2bc;Hist2h2bb;Hist1h2bh;Hist1h2bb;Hist1h2bm;Hist1h2bf	4	4	2	25.4	25.4	7.5	14.888	0	50.843	4581500000	319	4	4	4	4	4	4	4	4	4	4	4	4	2	2	2	2	2	2	2	2	2	2	2	2	28.8455	28.5156	28.6505	28.9188	28.7315	28.726	28.9042	28.638
	0.572999	-0.350781	P10922	P10922	Histone H1.0;Histone H1.0, N-terminally processed	H1f0	2	2	2	10.8	10.8	10.8	20.861	0	5.8114	50689000	28	2	2	2	2	2	2	2	1	2	2	2	2	2	2	2	2	2	2	2	1	2	2	2	2	22.2366	22.5174	21.8662	22.8558	22.1865	22.6301	22.4393	22.0654
	0.87304	0.266031	P11031	P11031	Activated RNA polymerase II transcriptional coactivator p15	Sub1	2	2	2	15.7	15.7	15.7	14.427	0	5.2693	40644000	3	2	2	2	2	2	1	2	2	2	2	2	2	2	2	2	2	2	1	2	2	2	2	2	2	22.203	21.984	22.0843	21.8988	21.9974	21.577	21.9734	22.1138
	0.499828	0.0703971	P11404	P11404	Fatty acid-binding protein, heart	Fabp3	6	6	6	46.6	46.6	46.6	14.819	0	27.854	192170000	92	5	5	5	5	6	6	5	6	5	4	6	5	5	5	5	5	6	6	5	6	5	4	6	5	24.2224	24.0244	24.1465	24.0295	24.0508	24.1017	24.011	24.12
	2.66665	0.170125	P11499;E9Q3D6;E9PX27;D3Z1R1;E9Q0C3	P11499	Heat shock protein HSP 90-beta	Hsp90ab1	35	35	23	51	51	37.4	83.28	0	323.31	6328300000	1407	33	33	32	33	32	31	33	33	34	32	33	32	21	22	21	21	21	20	21	21	22	20	21	21	29.3192	29.253	29.3075	29.1285	29.0984	29.1425	29.0198	29.0018
	0.218071	-0.0296669	P11798;F8WIS9;F8WHB5;P11798-2;F6WHR9;D3Z7K9	P11798;F8WIS9	Calcium/calmodulin-dependent protein kinase type II subunit alpha	Camk2a	21	21	16	58.6	58.6	42.1	54.114	0	323.31	17160000000	1804	20	19	20	20	21	21	20	19	20	20	20	20	15	14	15	15	16	16	15	14	15	15	15	15	30.738	30.8362	30.6844	30.7252	30.8165	30.8059	30.5966	30.6109
	0.293569	0.160632	P11881-8;P11881-7;P11881-6;P11881-5;P11881-4;P11881-2;P11881-3;P11881;A0A0N4SWI0;Q9Z329-2;Q9Z329-3;P70227;Q9Z329	P11881-8;P11881-7;P11881-6;P11881-5;P11881-4;P11881-2;P11881-3;P11881	Inositol 1,4,5-trisphosphate receptor type 1	Itpr1	6	6	6	4	4	4	306.86	0	12.901	44974000	4	2	2	2	3	3	2	1	4	3	3	5	4	2	2	2	3	3	2	1	4	3	3	5	4	22.3018	21.6781	21.8303	22.0116	21.6543	21.6625	22.2561	22.2063
	0.757556	0.117649	P11983;P11983-2;F2Z483	P11983;P11983-2	T-complex protein 1 subunit alpha	Tcp1	14	14	14	31.8	31.8	31.8	60.448	0	43.721	350940000	59	11	11	13	13	12	10	10	11	11	12	14	9	11	11	13	13	12	10	10	11	11	12	14	9	25.2336	25.0818	25.2831	25.0095	25.137	25.099	25.1745	25.1742
	1.40591	0.198048	P12382;A0A1W2P7T1;A0A1W2P6Q4	P12382	ATP-dependent 6-phosphofructokinase, liver type	Pfkl	20	17	16	37.9	34.2	31.8	85.359	0	220.73	1211800000	205	15	15	15	14	14	16	16	14	15	15	14	15	14	14	14	13	13	15	15	13	14	14	13	14	27.0587	27.1	26.9125	26.7728	26.8186	26.8856	26.9146	26.9995
	0.0845113	0.029377	P12658	P12658	Calbindin	Calb1	10	10	9	45.2	45.2	41	29.994	0	90.642	738250000	185	10	9	9	8	7	7	10	8	9	10	10	9	9	8	8	7	6	6	9	7	8	9	9	8	26.1382	26.0906	26.258	26.2369	26.2539	25.9079	26.0842	26.0396
	0.0485662	-0.012366	P12787	P12787	Cytochrome c oxidase subunit 5A, mitochondrial	Cox5a	8	8	8	54.1	54.1	54.1	16.101	0	198.01	3379600000	378	8	8	8	8	8	8	8	8	8	8	8	8	8	8	8	8	8	8	8	8	8	8	8	8	28.2434	28.2805	28.355	28.4344	28.3252	28.1563	28.5363	28.2968
	1.10477	-0.375764	P12815-2;P12815	P12815-2;P12815	Programmed cell death protein 6	Pdcd6	4	4	4	22.2	22.2	22.2	21.663	0	13.293	55025000	30	3	2	4	3	3	3	4	4	3	3	2	3	3	2	4	3	3	3	4	4	3	3	2	3	22.2823	22.1494	22.4632	22.5231	22.563	22.9362	22.6491	22.4675
	0.89824	-0.0835889	P12960	P12960	Contactin-1	Cntn1	26	26	26	34.7	34.7	34.7	113.39	0	282.32	2207800000	568	22	23	22	23	24	20	21	23	26	22	22	22	22	23	22	23	24	20	21	23	26	22	22	22	27.6879	27.7797	27.7044	27.7419	27.8359	27.8449	27.8073	27.7748
	0.0066402	-0.00206757	P12970;A0A140T8L3;V9GX35	P12970;A0A140T8L3	60S ribosomal protein L7a	Rpl7a	7	7	7	31.2	31.2	31.2	29.976	0	28.847	167880000	68	5	5	5	5	3	5	4	5	4	7	6	5	5	5	5	5	3	5	4	5	4	7	6	5	24.099	23.9879	24.1106	24.2465	24.0317	23.9255	24.3646	24.1162
	0.176	-0.0152028	P14094;A0A0A6YX05	P14094;A0A0A6YX05	Sodium/potassium-transporting ATPase subunit beta-1	Atp1b1	12	12	12	41.1	41.1	41.1	35.194	0	323.31	7847700000	1313	12	12	12	12	12	12	12	12	12	12	12	12	12	12	12	12	12	12	12	12	12	12	12	12	29.5559	29.5767	29.5133	29.5397	29.5342	29.6177	29.6438	29.5079
	0.204149	-0.082613	P14115	P14115	60S ribosomal protein L27a	Rpl27a	1	1	1	8.1	8.1	8.1	16.605	0	6.9204	45106000	22	1	1	1	1	1	1	1	1	1	1	1	1	1	1	1	1	1	1	1	1	1	1	1	1	22.3478	21.9275	22.0506	22.3164	22.2503	22.007	22.3334	22.1347
	0.543533	0.295881	P14131	P14131	40S ribosomal protein S16	Rps16	5	5	5	32.9	32.9	32.9	16.445	0	10.967	122590000	17	5	3	4	4	4	4	4	4	3	5	4	4	5	3	4	4	4	4	4	4	3	5	4	4	23.4279	23.7534	23.3511	23.4502	23.3913	22.8033	23.7801	23.6937
	0.868909	0.129471	P14148;F6XI62	P14148;F6XI62	60S ribosomal protein L7	Rpl7	5	5	5	21.5	21.5	21.5	31.419	0	24.421	227270000	62	5	5	5	5	5	5	5	5	5	5	5	5	5	5	5	5	5	5	5	5	5	5	5	5	24.587	24.7141	24.4934	24.4339	24.4508	24.5215	24.5635	24.5527
	0.808603	-0.0756785	P14152;B1ATQ3	P14152	Malate dehydrogenase, cytoplasmic	Mdh1	12	12	12	43.7	43.7	43.7	36.511	0	323.31	7025200000	686	11	12	12	11	12	11	12	12	11	11	12	11	11	12	12	11	12	11	12	12	11	11	12	11	29.2072	29.3233	29.2915	29.3012	29.3579	29.39	29.4019	29.4283
	0.519811	-0.151765	P14206;A0A1L1SRW0;A0A1L1SUK3	P14206	40S ribosomal protein SA	Rpsa	11	11	11	57.6	57.6	57.6	32.838	0	159.67	644420000	191	10	9	10	10	10	10	10	9	10	10	10	9	10	9	10	10	10	10	10	9	10	10	10	9	25.8116	26.0031	25.7777	26.0788	26.1622	25.8067	26.0085	26.0298
	0.512758	0.0945333	P14211	P14211	Calreticulin	Calr	14	14	14	47.1	47.1	47.1	47.994	0	106.35	1353100000	355	12	11	10	10	10	8	11	10	11	12	10	9	12	11	10	10	10	8	11	10	11	12	10	9	27.0763	26.9446	27.1439	26.8937	27.0711	26.9164	27.0456	26.8957
	0.889333	-0.162937	P14231;I7HIF3	P14231	Sodium/potassium-transporting ATPase subunit beta-2	Atp1b2	11	11	11	40	40	40	33.344	0	83.368	1307500000	211	11	11	11	9	10	9	9	10	11	9	10	9	11	11	11	9	10	9	9	10	11	9	10	9	26.9904	26.72	26.8671	26.9841	27.0907	26.9915	27.0928	27.0425
	0.231443	0.107783	P14685;F7B7L8	P14685	26S proteasome non-ATPase regulatory subunit 3	Psmd3	5	5	5	14.2	14.2	14.2	60.718	0	24.722	100360000	17	4	5	5	4	4	3	5	3	4	4	3	3	4	5	5	4	4	3	5	3	4	4	3	3	23.4194	23.0244	23.4512	22.9899	23.1752	23.4065	23.1601	23.2901
	0.634532	-0.190231	P14733	P14733	Lamin-B1	Lmnb1	4	4	4	7.5	7.5	7.5	66.785	0	9.5105	29021000	4	2	3	2	2	2	2	2	2	2	4	2	2	2	3	2	2	2	2	2	2	2	4	2	2	21.569	21.2489	21.561	21.4906	21.7789	21.6801	21.4855	21.4064
	1.05752	0.147116	P14869;D3YVM5;S4R1N1	P14869;D3YVM5;S4R1N1	60S acidic ribosomal protein P0	Rplp0	5	5	5	26.5	26.5	26.5	34.216	0	94.679	212820000	53	4	3	4	4	5	3	4	5	4	4	4	3	4	3	4	4	5	3	4	5	4	4	4	3	24.4228	24.5034	24.4203	24.1844	24.3441	24.3766	24.3934	24.2022
	0.0466269	0.00633812	P14873	P14873	Microtubule-associated protein 1B;MAP1B heavy chain;MAP1 light chain LC1	Map1b	54	52	52	36.7	35.8	35.8	270.25	0	323.31	3424100000	721	48	42	42	43	41	40	44	47	45	45	42	40	48	42	42	43	41	40	44	47	45	45	42	40	28.4167	28.3247	28.4567	28.4256	28.4101	28.3434	28.3295	28.3449
	0.164743	0.0322329	P15105;D3YVK1;D3Z121	P15105	Glutamine synthetase	Glul	17	17	17	60.9	60.9	60.9	42.119	0	323.31	7622700000	994	17	16	15	16	17	15	17	16	16	15	16	17	17	16	15	16	17	15	17	16	16	15	16	17	29.5439	29.3586	29.5456	29.3748	29.5089	29.4678	29.5718	29.4671
	0.436474	-0.171429	P15209-3;P15209;P15209-4;A0A286YDA0;A0A286YCV8;A0A286YDA3;P15209-2	P15209-3;P15209;P15209-4;A0A286YDA0;A0A286YCV8;A0A286YDA3;P15209-2	BDNF/NT-3 growth factors receptor	Ntrk2	6	6	5	14.9	14.9	13	86.534	0	31.791	135990000	29	5	4	3	5	4	5	5	4	4	6	5	5	4	3	3	4	4	4	4	3	3	5	4	4	23.8713	23.3811	23.6127	23.6299	23.9447	23.8048	23.8266	24.1089
	0.326859	-0.0687777	P15532	P15532	Nucleoside diphosphate kinase A	Nme1	10	1	1	71.1	9.9	9.9	17.208	0	27.149	299610000	25	1	1	1	1	1	1	1	1	1	1	1	1	1	1	1	1	1	1	1	1	1	1	1	1	24.8709	24.6988	24.6841	24.9395	24.7914	24.7292	25.0449	24.9483
	0.0914708	-0.0338262	P15864;I7HFT9;Q07133	P15864	Histone H1.2	Hist1h1c	5	3	1	23.1	13.7	7.5	21.266	0	10.632	152400000	60	3	3	3	3	3	3	3	2	2	3	3	3	1	1	1	1	1	1	1	0	0	1	1	1	24.1105	23.8809	24.1005	24.2422	24.0832	23.8681	23.8717	23.3254
	0.402557	0.0691032	P16054;P23298;Q8C944	P16054	Protein kinase C epsilon type	Prkce	13	13	13	23.3	23.3	23.3	83.56	0	95.941	406650000	114	12	11	12	11	9	10	12	12	11	10	12	12	12	11	12	11	9	10	12	12	11	10	12	12	25.453	25.5515	25.4594	25.5472	25.3761	25.3332	25.253	25.2774
	1.0699	-0.113386	P16125;D3Z7F0;A0A0N4SVV8	P16125;D3Z7F0	L-lactate dehydrogenase B chain;L-lactate dehydrogenase	Ldhb	19	18	18	63.5	59.9	59.9	36.572	0	274.81	3855900000	760	17	18	16	17	15	15	16	17	17	16	17	17	17	18	16	17	15	15	16	17	17	16	17	17	28.478	28.3932	28.3319	28.486	28.4904	28.5668	28.6605	28.5966
	1.89266	-0.209897	P16330-2;P16330	P16330-2;P16330	2,3-cyclic-nucleotide 3-phosphodiesterase	Cnp	28	28	28	70	70	70	44.654	0	323.31	15763000000	1904	28	28	27	27	27	26	27	26	27	28	28	27	28	28	27	27	27	26	27	26	27	28	28	27	30.3276	30.3195	30.4694	30.5707	30.5868	30.5886	30.5761	30.4834
	1.02783	-0.261182	P16460	P16460	Argininosuccinate synthase	Ass1	7	7	7	26.9	26.9	26.9	46.584	0	36.199	160780000	48	7	5	4	5	5	4	4	7	7	7	5	5	7	5	4	5	5	4	4	7	7	7	5	5	23.9074	24.0745	23.6771	24.2014	24.1472	24.0939	23.9877	23.797
	0.127787	-0.0425116	P17156	P17156	Heat shock-related 70 kDa protein 2	Hspa2	14	7	6	26.7	15.8	14.1	69.641	0	20.183	210200000	33	5	6	6	5	4	3	6	6	6	4	5	5	5	5	5	5	4	3	5	6	5	4	5	5	24.2268	24.2734	24.2286	24.1153	24.5197	24.2214	24.5452	24.2058
	0.229716	0.0296669	P17182;Q6PHC1;B0QZL1;B1ARR7;A0A0N4SUI6;B1ARR6;Q5SX59;A0A0N4SUW8;Q5SX61;Q5SX60	P17182;Q6PHC1	Alpha-enolase	Eno1	20	16	15	70.3	54.6	51.4	47.14	0	323.31	10369000000	1431	15	16	16	15	15	15	15	15	16	15	15	16	14	15	15	14	14	14	14	14	15	14	14	15	29.838	29.8225	29.8541	29.8997	29.7977	29.7282	29.9822	29.7324
	1.36188	-0.0430298	P17183;A0A0N4SUX5;D3Z6E4;D3Z2S4;D3YVD3	P17183;A0A0N4SUX5;D3Z6E4	Gamma-enolase;Enolase	Eno2	20	20	15	71.2	71.2	53.7	47.296	0	323.31	12486000000	2490	20	20	20	20	20	19	20	19	20	19	20	20	15	15	15	15	15	14	15	14	15	15	15	15	29.8041	29.8072	29.7615	29.8326	29.836	29.8333	29.8723	29.8605
	0.444508	-0.0385482	P17426-2;P17426;A0A140LIG7;A0A140LHA6;A0A140LHG0	P17426-2;P17426	AP-2 complex subunit alpha-1	Ap2a1	34	27	27	45.3	35.7	35.7	105.48	0	144.41	1972900000	435	23	26	22	24	24	24	25	25	24	24	22	25	23	26	22	24	24	24	25	25	24	24	22	25	27.5186	27.6039	27.6119	27.5876	27.6604	27.6019	27.6178	27.5965
	0.203977	-0.021843	P17427;A0A0J9YUA7	P17427	AP-2 complex subunit alpha-2	Ap2a2	34	34	27	49.5	49.5	39.7	104.02	0	323.31	3829500000	984	31	29	33	31	30	30	27	31	30	31	29	29	25	23	26	24	23	23	22	24	24	25	23	24	28.523	28.5613	28.574	28.5652	28.6453	28.5133	28.5606	28.5284
	3.3156	-0.110547	P17710-3	P17710-3	Hexokinase-1	Hk1	37	37	1	50	50	2.3	102.3	0	323.31	4840200000	955	33	34	33	34	33	32	36	32	34	34	35	32	1	1	1	1	1	1	1	1	1	1	1	1	28.9043	28.8888	28.8796	28.9937	28.9935	29.017	28.8388	28.883
	0.815122	-0.117416	P17742;A0A1L1SST0;F8VPN3;V9GXC1;V9GX31;A0A1L1SRX5	P17742;A0A1L1SST0	Peptidyl-prolyl cis-trans isomerase A;Peptidyl-prolyl cis-trans isomerase A, N-terminally processed	Ppia	12	12	12	70.7	70.7	70.7	17.971	0	196.22	7043500000	967	12	12	12	12	12	11	12	12	11	10	12	11	12	12	12	12	12	11	12	12	11	10	12	11	29.04	29.2185	29.0247	29.2496	29.2186	29.1673	29.1541	29.1371
	0.352179	-0.0681438	P17751;H7BXC3	P17751;H7BXC3	Triosephosphate isomerase	Tpi1	14	14	14	65.6	65.6	65.6	32.191	0	195.69	6983600000	626	12	11	12	11	11	13	12	12	12	12	13	13	12	11	12	11	11	13	12	12	12	12	13	13	29.2072	29.2479	29.3673	29.3041	29.468	29.2547	29.3098	29.1917
	0.790211	-0.153889	P17809	P17809	Solute carrier family 2, facilitated glucose transporter member 1	Slc2a1	3	3	3	6.7	6.7	6.7	53.984	0	16.123	59409000	26	3	2	3	3	3	3	3	3	3	3	2	3	3	2	3	3	3	3	3	3	3	3	2	3	22.4079	22.532	22.4677	22.4855	22.6132	22.7706	22.5873	22.7049
	0.0085097	-0.0037117	Q61696;P17879	Q61696;P17879	Heat shock 70 kDa protein 1A;Heat shock 70 kDa protein 1B	Hspa1a;Hspa1b	11	8	5	22	14.5	10.3	70.078	0	39.209	145000000	23	5	7	6	7	7	7	7	7	4	8	6	8	3	4	4	4	4	5	4	5	2	5	3	5	23.9966	23.7863	24.1228	23.7929	24.1552	23.9687	23.6739	23.6533
	0.150412	0.0215575	P18760;F8WGL3	P18760;F8WGL3	Cofilin-1	Cfl1	14	14	13	66.3	66.3	59.6	18.559	0	274.07	4765100000	949	13	13	12	13	13	13	11	12	12	13	14	12	12	12	11	12	12	12	10	11	11	12	13	11	28.6238	28.753	28.6599	28.603	28.7282	28.6409	28.7234	28.6583
	0.309705	0.0302817	P18872;D3Z2M7;F7BLT7;F6WC15;F6W1B2;A2A610;A2AE31	P18872;D3Z2M7	Guanine nucleotide-binding protein G(o) subunit alpha	Gnao1	19	19	5	59	59	16.9	40.084	0	323.31	7302800000	1338	16	18	16	18	17	15	17	16	17	17	18	18	4	5	3	5	5	4	4	5	4	3	4	4	29.4333	29.3519	29.4483	29.4301	29.3399	29.3727	29.4039	29.2682
	0.298853	0.0706348	P18872-2	P18872-2	Guanine nucleotide-binding protein G(o) subunit alpha	Gnao1	16	2	1	53.1	11	8.5	40.036	0	10.979	133410000	29	1	1	1	1	1	2	1	1	1	1	1	1	0	0	0	0	0	1	0	0	0	0	0	0	23.8819	23.6469	23.6289	23.6754	23.7198	23.5505	23.9537	23.7774
	0.188001	0.0717036	P19157;P46425;Q8VC73;F6RWR5	P19157;P46425	Glutathione S-transferase P 1;Glutathione S-transferase P 2	Gstp1;Gstp2	8	8	8	50.5	50.5	50.5	23.609	0	300	2550400000	302	7	6	8	8	8	8	7	6	8	6	7	8	7	6	8	8	8	8	7	6	8	6	7	8	27.8766	27.9624	27.9581	27.9779	27.5759	28.0282	27.9061	27.8258
	0.495916	0.148422	P19246	P19246	Neurofilament heavy polypeptide	Nefh	10	8	8	12.6	10.7	10.7	116.99	0	62.506	330090000	80	7	6	7	7	6	7	5	7	7	6	7	7	7	6	7	7	6	7	5	7	7	6	7	7	25.2203	24.9503	24.9087	25.0428	24.7488	24.8424	25.0816	25.1272
	0.130463	0.0526422	Q9D881;P19536;F7C106;A0A0A6YVR0	Q9D881;P19536	Cytochrome c oxidase subunit 5B, mitochondrial	Cox5b	4	4	4	24.8	24.8	24.8	13.847	0	19.609	491790000	154	4	4	4	4	4	4	4	4	4	4	4	4	4	4	4	4	4	4	4	4	4	4	4	4	25.482	25.2669	25.0652	25.3666	25.0665	25.223	25.3644	25.0728
	1.33235	0.078399	P19783;M0QWX7;D6RG40	P19783	Cytochrome c oxidase subunit 4 isoform 1, mitochondrial	Cox4i1	10	10	10	54.4	54.4	54.4	19.53	0	122.77	2143000000	241	9	9	10	9	9	10	8	9	10	9	9	9	9	9	10	9	9	10	8	9	10	9	9	9	27.6793	27.7396	27.6474	27.6031	27.6204	27.6076	27.7169	27.6761
	0.190881	-0.0527763	P20029	P20029	78 kDa glucose-regulated protein	Hspa5	20	18	18	37.6	35.9	35.9	72.421	0	167.16	877210000	278	15	16	17	14	14	14	15	16	15	16	17	16	15	16	17	14	14	14	15	16	15	16	17	16	26.1382	26.4544	26.1874	26.2339	26.3567	26.3476	26.156	26.3233
	0.320498	-0.176399	P20065-2;P20065	P20065-2	Thymosin beta-4;Hematopoietic system regulatory peptide	Tmsb4x	3	3	3	61.4	61.4	61.4	5.0526	0	85.349	3670500000	261	2	2	2	3	2	2	2	2	2	3	2	2	2	2	2	3	2	2	2	2	2	3	2	2	28.3873	28.3083	28.7078	28.2727	28.7627	28.8972	28.5063	28.4035
	0.832828	0.240262	P20108	P20108	Thioredoxin-dependent peroxide reductase, mitochondrial	Prdx3	5	5	5	35.8	35.8	35.8	28.127	0	84.169	631530000	87	3	4	4	4	4	3	4	4	4	5	5	5	3	4	4	4	4	3	4	4	4	5	5	5	25.9226	26.2312	25.8627	25.6313	25.8661	25.7983	25.9768	26.207
	0.989236	-0.278591	P20152;A0A0A6YWC8;A2AKJ2;G5E846;A0A2R8W6R6;G3X981;P15331-3;P15331;P15331-2	P20152;A0A0A6YWC8	Vimentin	Vim	10	9	9	25.8	23.8	23.8	53.687	0	40.106	231870000	63	9	7	9	9	8	8	8	5	8	6	8	5	9	7	9	9	8	8	8	5	8	6	8	5	24.381	24.2667	24.3303	24.3951	24.5824	24.8363	24.2916	24.5651
	0.619976	-0.0596447	P20357;G3UZK9;G3UZE9;F7ALC8;G3UZV6;Q80X35;Q80ZL4;Q3TLQ0;G3UWW1;E9Q8Y2;G3UXY3	P20357;G3UZK9	Microtubule-associated protein 2	Map2	71	71	67	55.4	55.4	52.3	199.13	0	323.31	6412100000	1384	59	60	61	56	60	56	56	60	59	62	62	66	55	56	57	52	56	52	52	56	55	58	58	62	29.2448	29.2768	29.2738	29.2595	29.4032	29.3116	29.1611	29.2185
	0.339889	0.0729001	P21107-2;D3Z2H9;E9Q5J9	P21107-2;D3Z2H9;E9Q5J9	Tropomyosin alpha-3 chain	Tpm3;Tpm3-rs7	14	14	3	38.3	38.3	8.9	29.02	0	98.477	1124000000	161	11	11	12	10	13	11	10	11	12	14	11	13	2	2	2	2	2	2	2	2	2	3	2	2	26.7282	26.6863	26.7728	26.5107	26.8054	26.6525	26.4245	26.6763
	0.866302	-0.200336	P21126;F8WHM4	P21126	Ubiquitin-like protein 4A	Ubl4a	3	3	3	26.1	26.1	26.1	17.8	0	7.1685	36776000	8	2	3	3	2	2	2	2	2	3	3	3	3	2	3	3	2	2	2	2	2	3	3	3	3	21.8686	21.9548	21.7043	22.0161	21.9222	22.1904	21.7681	22.1067
	0.243024	-0.0643698	P21278	P21278	Guanine nucleotide-binding protein subunit alpha-11	Gna11	16	8	7	53.2	32.6	27.3	42.024	0	98.092	272420000	95	5	5	6	4	6	4	5	6	6	7	6	6	4	4	5	3	5	3	4	5	5	6	5	5	24.4599	24.703	24.543	24.7818	24.5889	24.5283	25.0074	24.6455
	0.0179114	0.0034256	P21279	P21279	Guanine nucleotide-binding protein G(q) subunit alpha	Gnaq	16	16	7	53.5	53.5	28.7	42.158	0	156.04	1126800000	241	14	14	13	13	13	10	13	14	13	16	14	14	5	6	6	5	5	5	6	6	5	7	7	7	26.8718	26.8884	26.7129	26.8277	26.8695	26.7657	26.9137	26.7614
	0.760595	-0.330801	P21460;A2APX3	P21460;A2APX3	Cystatin-C	Cst3	3	3	3	32.1	32.1	32.1	15.531	0	24.742	114140000	33	2	2	3	2	2	2	2	2	3	2	2	2	2	2	3	2	2	2	2	2	3	2	2	2	23.8955	23.3198	23.7077	23.8527	24.1837	23.8789	23.5458	23.0849
	0.657902	0.194533	Q544X6;P22315	Q544X6;P22315	Ferrochelatase;Ferrochelatase, mitochondrial	Fech	6	6	6	22	22	22	47.421	0	22.405	87998000	31	5	4	4	4	2	3	4	4	4	4	4	3	5	4	4	4	2	3	4	4	4	4	4	3	23.2991	23.3026	22.9061	22.9539	22.9463	23.0239	23.3378	23.4111
	1.27498	-0.221855	Q8C7N0;P22723-2;P22723;A0A0G2JDP9;Q9R0Y8	Q8C7N0;P22723-2;P22723	Gamma-aminobutyric acid receptor subunit gamma-2	Gabrg2	3	3	3	10.2	10.2	10.2	44.503	0	11.267	33318000	10	1	3	2	3	3	1	2	3	2	3	2	2	1	3	2	3	3	1	2	3	2	3	2	2	21.4594	21.5913	21.6423	21.8209	21.6679	21.8697	21.6352	21.8177
	0.291638	0.168367	Q8CBB7;P22892	Q8CBB7;P22892	AP-1 complex subunit gamma-1	Ap1g1	6	6	6	9	9	9	91.721	0	22.085	63984000	20	6	6	2	5	6	4	5	4	5	5	4	4	6	6	2	5	6	4	5	4	5	5	4	4	22.419	22.4992	22.8378	22.7549	22.0787	22.4173	22.2517	22.4068
	0.0164153	0.0101236	P23242	P23242	Gap junction alpha-1 protein	Gja1	4	4	4	13.6	13.6	13.6	43.004	0	99.528	192260000	80	4	4	4	4	4	4	4	4	4	4	4	4	4	4	4	4	4	4	4	4	4	4	4	4	23.9393	24.0821	24.5602	24.0477	24.1748	24.3288	23.9822	24.2519
	0.416658	-0.169243	Q8CBC8;P24288;E9Q4K3;B2KFA8;B2KFA9;A0A0N4SV61	Q8CBC8;P24288;E9Q4K3	Branched-chain-amino-acid aminotransferase;Branched-chain-amino-acid aminotransferase, cytosolic	Bcat1	7	7	7	19.4	19.4	19.4	49.9	0	46.045	99374000	22	5	5	5	6	5	4	5	5	5	5	6	4	5	5	5	6	5	4	5	5	5	5	6	4	22.9707	23.2127	23.2333	23.1577	23.6101	23.1566	23.786	23.1597
	0.33064	0.185485	P24369	P24369	Peptidyl-prolyl cis-trans isomerase B	Ppib	7	7	7	33.3	33.3	33.3	23.713	0	23.718	198960000	56	7	6	5	6	5	5	7	6	6	7	7	7	7	6	5	6	5	5	7	6	6	7	7	7	24.4475	24.4385	24.1793	24.4786	23.7596	24.2706	24.1519	24.4216
	0.84035	-0.294835	P24472;A0A1L1SS61	P24472	Glutathione S-transferase A4	Gsta4	5	5	5	28.4	28.4	28.4	25.564	0	25.817	160140000	70	5	4	5	5	5	5	4	5	4	5	5	5	5	4	5	5	5	5	4	5	4	5	5	5	24.0405	23.5308	23.9578	24.1163	24.2146	24.0828	23.7981	24.1362
	0.738348	-0.170434	P24527	P24527	Leukotriene A-4 hydrolase	Lta4h	12	12	12	27.7	27.7	27.7	69.05	0	91.526	279590000	57	10	11	10	12	12	8	9	11	9	12	12	11	10	11	10	12	12	8	9	11	9	12	12	11	24.614	24.715	24.5208	24.9499	24.6401	24.7712	24.7373	24.931
	0.680802	-0.222979	P24549;O35945;A0A286YDG6;A0A286YCZ0	P24549;O35945	Retinal dehydrogenase 1;Aldehyde dehydrogenase, cytosolic 1	Aldh1a1;Aldh1a7	6	5	5	24.2	22.6	22.6	54.467	0	20.548	124960000	22	4	3	4	4	4	4	3	3	3	4	4	4	4	3	4	4	4	4	3	3	3	4	4	4	23.6253	23.5072	23.3947	23.9034	23.8229	23.4699	23.0518	23.207
	0.698766	0.0982297	P25444;D3YVC1;D3YWJ3;D3Z536	P25444;D3YVC1;D3YWJ3	40S ribosomal protein S2	Rps2	5	5	5	18.4	18.4	18.4	31.231	0	24.8	188370000	52	5	4	5	4	5	4	3	5	5	5	4	5	5	4	5	4	5	4	3	5	5	5	4	5	24.3272	24.3462	24.1795	24.2105	24.1143	24.2335	24.3173	24.1503
	0.424483	0.139181	P26040	P26040	Ezrin	Ezr	10	10	5	17.6	17.6	11.6	69.406	0	45.823	230380000	103	9	8	8	9	7	8	7	8	10	8	7	10	4	4	4	5	4	4	3	4	5	4	3	5	24.4471	24.4814	24.5133	24.5462	24.0771	24.4009	24.4414	24.5715
	1.26007	-0.438211	P26231	P26231	Catenin alpha-1	Ctnna1	6	2	2	9.5	5.2	5.2	100.11	0	21.648	45148000	27	2	1	1	2	2	1	2	2	2	2	1	2	2	1	1	2	2	1	2	2	2	2	1	2	21.832	21.4807	22.0003	22.0982	22.2837	22.2458	22.0821	22.2207
	2.43811	-0.249474	P26443;F7CFA5	P26443	Glutamate dehydrogenase 1, mitochondrial	Glud1	27	27	27	59.1	59.1	59.1	61.336	0	323.31	3840800000	1071	27	27	26	27	27	26	24	26	26	27	25	27	27	27	26	27	27	26	24	26	26	27	25	27	28.2967	28.3301	28.352	28.5071	28.6366	28.5837	28.5284	28.5307
	0.165973	-0.0506821	P26516	P26516	26S proteasome non-ATPase regulatory subunit 7	Psmd7	5	5	5	28.7	28.7	28.7	36.539	0	49.253	109430000	41	5	5	4	4	5	4	5	5	4	5	5	5	5	5	4	4	5	4	5	5	4	5	5	5	23.3314	23.2322	23.3317	23.1546	23.3566	23.5361	23.635	23.5285
	0.111539	0.036513	Q8C483;P26638;A2AFS0;A2AFS1	Q8C483;P26638;A2AFS0	Serine--tRNA ligase, cytoplasmic	Sars	12	12	12	34.3	34.3	34.3	61.166	0	93.882	385830000	185	11	11	11	11	11	9	10	11	10	12	11	10	11	11	11	11	11	9	10	11	10	12	11	10	25.0976	25.3802	25.0789	25.2783	25.0507	25.1182	25.0771	25.2052
	0.18358	-0.0740121	P26645	P26645	Myristoylated alanine-rich C-kinase substrate	Marcks	2	2	2	12.9	12.9	12.9	29.661	0	3.6715	79509000	28	2	2	1	1	1	1	2	1	1	2	2	1	2	2	1	1	1	1	2	1	1	2	2	1	22.7455	22.7723	22.9817	22.6569	22.9479	23.1168	22.8237	22.6541
	0.635387	0.127043	P26883;F6X9I3	P26883;F6X9I3	Peptidyl-prolyl cis-trans isomerase FKBP1A;Peptidyl-prolyl cis-trans isomerase	Fkbp1a	3	3	3	54.6	54.6	54.6	11.922	0	39.5	719980000	133	2	3	3	2	2	2	2	3	2	3	2	3	2	3	3	2	2	2	2	3	2	3	2	3	26.1552	25.8862	26.1178	25.8621	25.9492	25.9668	26.115	25.7077
	0.214607	-0.0784206	P27048;P63163;A0A0G2JGN4	P27048;P63163	Small nuclear ribonucleoprotein-associated protein B;Small nuclear ribonucleoprotein-associated protein N	Snrpb;Snrpn	5	5	5	19.5	19.5	19.5	23.656	0	9.1326	55513000	13	4	4	4	4	3	4	5	4	5	4	5	4	4	4	4	4	3	4	5	4	5	4	5	4	22.3353	22.2772	22.7035	22.4447	22.609	22.4976	22.2918	22.6088
	0.19089	-0.0422789	P27546-3;P27546-2;P27546;Q78TF3	P27546-3;P27546-2;P27546	Microtubule-associated protein 4	Map4	12	8	8	18.7	13.2	13.2	113.65	0	59.471	154930000	45	5	6	6	5	4	2	4	5	6	6	6	7	5	6	6	5	4	2	4	5	6	6	6	7	23.8161	23.7861	23.9717	23.845	23.831	24.0246	23.9849	23.8089
	0.47636	0.13157	P27659;A0A087WNS0;A0A087WQK0;A0A2R8VHN4;Q9CQ09;E9PWZ3	P27659	60S ribosomal protein L3	Rpl3	7	7	7	26.8	26.8	26.8	46.109	0	40.027	199040000	56	6	5	7	7	7	3	7	7	4	6	7	7	6	5	7	7	7	3	7	7	4	6	7	7	24.4123	24.3579	24.391	24.468	24.2413	24.0572	24.4218	24.3065
	1.51831	-0.160375	P27773;F6Q404	P27773	Protein disulfide-isomerase A3	Pdia3	20	20	20	42.6	42.6	42.6	56.678	0	164.25	1182000000	374	17	16	17	16	18	18	18	16	17	17	17	20	17	16	17	16	18	18	18	16	17	17	17	20	26.757	26.8018	26.7095	26.994	26.8552	26.9002	26.7524	26.7044
	0.261677	0.177334	P28271	P28271	Cytoplasmic aconitate hydratase	Aco1	7	7	7	11.4	11.4	11.4	98.124	0	11.83	64843000	3	5	4	4	5	6	4	5	7	6	6	5	5	5	4	4	5	6	4	5	7	6	6	5	5	22.4274	22.5772	22.7349	22.5045	22.7845	21.9184	22.8763	22.8071
	0.764509	0.252295	P28474;Q64437;A0A0G2JGS3	P28474	Alcohol dehydrogenase class-3	Adh5	8	8	8	28.1	28.1	28.1	39.547	0	130.86	325540000	75	8	7	7	8	7	5	6	7	7	8	8	8	8	7	7	8	7	5	6	7	7	8	8	8	25.208	24.9293	24.9597	24.8815	24.9245	24.5342	25.267	25.049
	1.20764	-0.145684	Q5SVJ0;P28652;Q5SVI3;Q5SVI0;Q5SVI2;Q5SVI9;Q5SVJ1;Q68EG2;Q5SVI1	Q5SVJ0;P28652;Q5SVI3;Q5SVI0;Q5SVI2;Q5SVI9;Q5SVJ1;Q68EG2;Q5SVI1	Calcium/calmodulin-dependent protein kinase type II subunit beta	Camk2b	16	11	8	38.9	27	21.9	72.902	0	288.39	3360900000	375	11	10	11	11	11	10	10	11	11	10	11	11	8	8	8	8	8	7	7	8	8	7	8	8	28.1271	28.1878	28.2637	28.4188	28.287	28.3099	28.3041	28.265
	0.373688	0.261752	P28658	P28658	Ataxin-10	Atxn10	5	5	5	14.7	14.7	14.7	53.706	0	17.013	86924000	15	5	4	4	3	4	4	3	4	4	5	3	3	5	4	4	3	4	4	3	4	4	5	3	3	23.8152	22.8625	23.2296	23.2099	22.8775	23.0347	23.1999	22.9493
	0.536471	0.456212	P28661-5;P28661-4;P28661-3;P28661-2;P28661;Q5ND13;Q5ND09;Q5ND18;P28661-6	P28661-5;P28661-4;P28661-3;P28661-2;P28661;Q5ND13;Q5ND09	Septin-4	2018-09-04	3	3	3	18.2	18.2	18.2	36.339	0	10.602	54007000	20	2	3	3	2	3	2	2	2	3	2	3	2	2	3	3	2	3	2	2	2	3	2	3	2	22.0811	22.6048	22.1747	22.3459	21.9538	21.1923	22.427	22.55
	0.399658	0.0754827	P28663;D6RHL2	P28663	Beta-soluble NSF attachment protein	Napb	16	16	13	68.5	68.5	57	33.557	0	323.31	1269200000	336	15	12	14	11	13	14	11	14	12	13	12	14	12	9	11	8	10	11	9	11	10	10	9	11	26.943	27.1417	27.1175	26.9422	26.9422	27.0913	26.9332	26.9637
	0.0237705	-0.00907326	P28738;P33175;A2ARD4	P28738	Kinesin heavy chain isoform 5C	Kif5c	17	17	15	24.4	24.4	21.8	109.27	0	90.628	238670000	48	12	12	13	12	9	10	11	13	11	11	13	11	10	10	11	10	7	8	9	11	9	9	11	9	24.5379	24.3243	24.5482	24.5228	24.6348	24.2801	24.5268	24.5048
	0.229789	0.0412992	P29341;Q9D4E6;Q62029;F6ZAX1;A0A2I3BR37;Q91YZ8;A3KFU5;A3KFU8;Q6PHQ9;A2A5N3;V9GXG3	P29341;Q9D4E6	Polyadenylate-binding protein 1;Polyadenylate-binding protein	Pabpc1;Pabpc6	14	14	14	32.1	32.1	32.1	70.67	0	64.581	525800000	134	13	12	9	12	11	9	10	10	12	11	12	13	13	12	9	12	11	9	10	10	12	11	12	13	25.5521	25.5577	25.7182	25.4799	25.6244	25.5998	25.6857	25.7594
	1.36822	0.410665	P29595	P29595	NEDD8	Nedd8	2	2	2	34.6	34.6	34.6	8.9723	0	13.315	88629000	4	2	2	2	2	2	2	2	2	2	2	1	2	2	2	2	2	2	2	2	2	2	2	1	2	22.9895	22.8587	22.8887	22.2328	22.6425	22.6296	23.2727	23.4029
	0.927901	-0.170728	P29758	P29758	Ornithine aminotransferase, mitochondrial	Oat	11	11	11	46	46	46	48.354	0	56.299	246520000	77	10	6	9	8	9	6	9	9	10	9	11	10	10	6	9	8	9	6	9	9	10	9	11	10	24.4831	24.6893	24.4736	24.6329	24.7214	24.804	24.8247	24.4948
	1.76756	-0.15255	P30275;A2ARP5;B0R0E9;B0R0E8;B0R0F0	P30275;A2ARP5	Creatine kinase U-type, mitochondrial	Ckmt1	15	15	13	53.1	53.1	47.1	47.003	0	323.31	6495500000	509	15	14	14	15	15	15	15	15	14	14	15	13	13	12	12	13	13	13	13	13	12	12	13	11	29.1406	29.1718	29.175	29.275	29.3894	29.2807	29.2532	29.1951
	0.0672479	-0.0458171	P30416;F7CAT1;F6S2D5	P30416;F7CAT1;F6S2D5	Peptidyl-prolyl cis-trans isomerase FKBP4;Peptidyl-prolyl cis-trans isomerase FKBP4, N-terminally processed;Peptidyl-prolyl cis-trans isomerase	Fkbp4	4	4	4	11.4	11.4	11.4	51.572	0	4.8578	49407000	11	2	3	2	2	2	2	4	3	2	3	3	2	2	3	2	2	2	2	4	3	2	3	3	2	22.2953	21.9788	22.6151	22.0815	22.6041	22.3411	22.5046	22.5604
	1.46107	-0.339301	P31324;H3BK84	P31324;H3BK84	cAMP-dependent protein kinase type II-beta regulatory subunit	Prkar2b	9	8	8	34.9	31.2	31.2	46.167	0	115.81	374830000	90	6	6	6	5	6	6	7	6	7	8	6	6	6	6	6	5	6	6	7	6	7	8	6	6	24.8062	24.6798	24.5689	25.1763	24.8897	25.0068	24.9121	24.8815
	0.0357478	-0.0195675	P31648;A0A0N4SVF5	P31648;A0A0N4SVF5	Sodium- and chloride-dependent GABA transporter 1	Slc6a1	6	6	6	16.5	16.5	16.5	67.001	0	89.304	483200000	96	6	6	6	6	6	6	6	6	5	6	6	6	6	6	6	6	6	6	6	6	5	6	6	6	25.7533	25.5919	25.2005	25.7008	25.4129	25.4908	25.5698	25.3539
	0.728411	-0.243155	P31650;A0A0U1RQA5;A0A0U1RP20;A0A0U1RQA0;D3YWZ5;E9PXG1;F6UKB4;G5E8Z4;E9Q151;Q8VCS9;P31649;P31651;O55192;Q61327;O35316;Q8VBW1-3;Q8VBW1-2;Q8VBW1	P31650	Sodium- and chloride-dependent GABA transporter 3	Slc6a11	8	8	8	13.9	13.9	13.9	69.96	0	19.46	274850000	79	6	5	6	6	6	6	6	6	6	6	6	6	6	5	6	6	6	6	6	6	6	6	6	6	24.3088	24.2765	24.7089	24.6391	24.5867	24.7979	24.7682	24.9223
	0.481431	-0.21607	P31786;M0QWU8;Q4VWZ5;D3Z563	P31786;M0QWU8;Q4VWZ5	Acyl-CoA-binding protein	Dbi	4	4	4	55.2	55.2	55.2	10	0	99.337	1411000000	142	3	3	3	3	3	4	2	3	3	2	3	4	3	3	3	3	3	4	2	3	3	2	3	4	26.9143	27.271	26.903	27.2558	27.5054	26.9753	27.2967	27.0107
	1.2955	0.180997	P31938;M0QWN2;A0A1W2P7V9	P31938	Dual specificity mitogen-activated protein kinase kinase 1	Map2k1	16	16	11	50.9	50.9	39.9	43.474	0	128.65	822210000	230	13	13	12	13	13	12	15	13	11	14	14	13	9	9	8	9	9	8	10	9	8	10	10	9	26.5828	26.4378	26.5387	26.2591	26.4294	26.3277	26.4645	26.201
	1.26499	-0.299704	P32020-2;P32020	P32020-2;P32020	Non-specific lipid-transfer protein	Scp2	4	4	4	28	28	28	15.236	0	13.378	71094000	46	4	4	4	4	4	4	4	4	4	4	4	4	4	4	4	4	4	4	4	4	4	4	4	4	22.6488	22.6634	22.3935	22.7713	23.0003	22.8332	23.1783	22.9405
	0.0466607	0.00811386	P32037	P32037	Solute carrier family 2, facilitated glucose transporter member 3	Slc2a3	7	7	7	12.6	12.6	12.6	53.478	0	85.536	502280000	191	7	7	7	7	7	7	7	7	7	7	7	7	7	7	7	7	7	7	7	7	7	7	7	7	25.708	25.5859	25.5339	25.6252	25.5421	25.6361	25.8177	25.7301
	0.531647	-0.201565	P32921-2;P32921	P32921-2;P32921	Tryptophan--tRNA ligase, cytoplasmic;T1-TrpRS;T2-TrpRS	Wars	5	5	5	16	16	16	53.64	0	61.832	92040000	50	4	3	4	2	3	3	3	4	3	3	5	4	4	3	4	2	3	3	3	4	3	3	5	4	23.0085	23.142	23.0393	22.9466	23.4774	23.3705	22.7266	23.4083
	0.017596	0.0236047	P34022;H7BX22	P34022;H7BX22	Ran-specific GTPase-activating protein	Ranbp1	5	5	5	42.4	42.4	42.4	23.596	0	21.242	156300000	31	4	4	4	3	4	3	4	4	3	4	4	4	4	4	4	3	4	3	4	4	3	4	4	4	23.8133	23.9242	22.6744	23.8222	23.3671	23.1518	24.2009	23.6176
	0.445872	-0.895241	P34884	P34884	Macrophage migration inhibitory factor	Mif	2	2	2	17.4	17.4	17.4	12.504	0	24.904	973960000	125	2	2	2	2	2	2	2	2	2	2	2	2	2	2	2	2	2	2	2	2	2	2	2	2	24.1706	26.5583	26.8062	26.5097	27.1324	26.5787	26.2622	26.5083
	1.72604	-0.145248	P35235-2;P35235	P35235-2;P35235	Tyrosine-protein phosphatase non-receptor type 11	Ptpn11	14	14	14	35.8	35.8	35.8	68.034	0	80.965	231610000	74	12	12	12	11	12	6	9	12	13	13	13	10	12	12	12	11	12	6	9	12	13	13	13	10	24.4894	24.5057	24.3848	24.5991	24.6103	24.6061	24.5148	24.6064
	1.28833	0.467578	P35276;D3YWL1;D3YW33	P35276;D3YWL1;D3YW33	Ras-related protein Rab-3D	Rab3d	4	1	1	21	5	5	24.416	0	8.7229	186210000	77	1	1	1	1	1	1	1	1	1	1	1	1	1	1	1	1	1	1	1	1	1	1	1	1	24.0393	23.8274	23.6899	23.6571	23.2624	23.2344	23.6229	23.6184
	0.622154	0.124977	Q8C266;P35278;A2A5F5;A2A5F6	Q8C266;P35278	Ras-related protein Rab-5C	Rab5c	6	6	3	30.8	30.8	17.1	25.352	0	25.3	213480000	157	6	6	6	6	5	6	5	6	6	5	5	6	3	3	3	3	2	3	2	3	3	2	2	3	24.4546	24.2917	24.5542	24.2133	24.3454	24.3669	24.3004	24.3282
	0.0482535	0.0171916	P35293	P35293	Ras-related protein Rab-18	Rab18	3	3	3	19.9	19.9	19.9	23.035	0	20.307	69766000	10	2	2	3	3	2	1	2	2	2	2	2	2	2	2	3	3	2	1	2	2	2	2	2	2	22.7105	23.1055	22.9707	22.8358	22.9405	22.9589	22.853	22.6957
	0.0349083	0.00737508	P35436	P35436	Glutamate receptor ionotropic, NMDA 2A	Grin2a	6	5	5	5.5	5	5	165.42	0	8.4629	43703000	4	3	3	3	2	3	3	2	4	2	3	3	3	3	3	3	2	3	3	2	4	2	3	3	3	22.133	22.1758	22.2212	22.2323	22.2397	22.0358	22.0161	22.668
	0.164803	-0.0311788	P35486	P35486	Pyruvate dehydrogenase E1 component subunit alpha, somatic form, mitochondrial	Pdha1	13	13	13	40.3	40.3	40.3	43.231	0	177.64	2285600000	345	12	12	11	12	13	11	11	12	11	12	11	11	12	12	11	12	13	11	11	12	11	12	11	11	27.6982	27.7601	27.8088	27.6867	27.905	27.769	27.7674	27.6777
	0.418907	-0.195035	P35505;D3Z2R9	P35505	Fumarylacetoacetase	Fah	4	4	4	14.8	14.8	14.8	46.175	0	10.913	34250000	9	3	2	2	3	3	2	2	3	3	4	3	3	3	2	2	3	3	2	2	3	3	4	3	3	21.8206	21.7409	21.263	21.993	21.7186	21.698	21.267	21.7082
	0.115304	0.0326214	P35564	P35564	Calnexin	Canx	15	15	15	32.3	32.3	32.3	67.277	0	99.093	623900000	192	13	12	12	12	11	13	10	12	12	13	11	11	13	12	12	12	11	13	10	12	12	13	11	11	25.7385	25.7891	25.6113	25.8325	25.6814	25.5272	25.9987	25.8388
	0.357073	0.139345	P35585;D3YZ71;A0A1L1SUA0;A0A0R4IZX6;A0A0R4J1L4;Q9WVP1;Q9WVP1-2	P35585	AP-1 complex subunit mu-1	Ap1m1	6	6	6	19.6	19.6	19.6	48.542	0	17.347	79334000	20	4	5	4	5	5	3	5	4	6	6	6	4	4	5	4	5	5	3	5	4	6	6	6	4	23.1794	22.9905	23.0347	22.9134	23.1998	22.6734	23.0808	22.9491
	0.333512	0.0656287	P35700;B1AXW5;B1AXW6;B1AXW4	P35700;B1AXW5;B1AXW6;B1AXW4	Peroxiredoxin-1	Prdx1	12	12	11	67.8	67.8	63.8	22.176	0	85.677	1875900000	387	12	12	12	12	10	11	10	11	12	11	12	12	11	11	11	11	9	10	9	10	11	10	11	11	27.4906	27.5901	27.7009	27.4321	27.6181	27.5344	27.5815	27.669
	0.520495	-0.216007	P35762;A0A140LJL0	P35762;A0A140LJL0	CD81 antigen	Cd81	3	3	3	27.5	27.5	27.5	25.814	0	112.93	733420000	115	3	3	3	3	3	3	3	3	3	3	3	3	3	3	3	3	3	3	3	3	3	3	3	3	25.7593	26.169	25.6466	26.2235	26.0859	25.9135	26.5468	26.4033
	0.5536	0.187217	P35802	P35802	Neuronal membrane glycoprotein M6-a	Gpm6a	8	8	7	22.7	22.7	19.8	31.149	0	61.615	2854800000	109	8	8	8	7	7	8	8	8	6	7	8	8	7	7	7	6	6	7	7	7	5	6	7	7	28.2123	28.1415	28.3298	27.7723	28.2401	28.1095	28.131	28.0981
	1.27093	0.155452	P35803-8;A2AEG6;P35803-3;P35803;P35803-4;A2AEG3;P35803-5;P35803-2;H3BIV8;P35803-7;P35803-6	P35803-8;A2AEG6;P35803-3;P35803;P35803-4	Neuronal membrane glycoprotein M6-b	Gpm6b	5	4	4	21.2	18.4	18.4	31.658	0	92.238	579350000	376	4	4	4	4	4	4	4	4	4	4	4	4	4	4	4	4	4	4	4	4	4	4	4	4	25.9356	25.8305	26.0136	25.7826	25.802	25.7287	25.8575	25.5976
	0.534265	0.265921	P35979;F8VQK7	P35979	60S ribosomal protein L12	Rpl12	5	5	5	49.1	49.1	49.1	17.804	0	97.545	187110000	71	3	3	3	4	2	3	3	3	3	4	3	2	3	3	3	4	2	3	3	3	3	4	3	2	23.9864	24.2439	23.9643	24.1466	23.7972	23.453	24.329	24.5015
	0.478785	-0.340602	P36916;P36916-2	P36916;P36916-2	Guanine nucleotide-binding protein-like 1	Gnl1	4	4	4	7.9	7.9	7.9	68.77	0	19.68	26838000	9	2	2	2	3	2	1	3	3	4	1	3	3	2	2	2	3	2	1	3	3	4	1	3	3	20.4779	20.8955	21.5154	21.3435	21.1715	21.3956	21.4501	21.5486
	0.400025	0.152811	Q05DV1;P37040;E9PVT9;E9Q997	Q05DV1;P37040	NADPH--cytochrome P450 reductase	Por	4	4	4	10.8	10.8	10.8	72.93	0	25.535	69684000	16	4	4	3	2	2	2	2	3	3	3	3	2	4	4	3	2	2	2	2	3	3	3	3	2	22.7095	22.8617	22.9009	22.3719	22.7896	22.8522	22.7099	22.8208
	0.0450925	-0.0233409	P38060	P38060	Hydroxymethylglutaryl-CoA lyase, mitochondrial	Hmgcl	4	4	4	19.4	19.4	19.4	34.238	0	8.6633	45795000	1	2	4	2	4	3	2	2	3	4	3	2	2	2	4	2	4	3	2	2	3	4	3	2	2	22.4195	21.9496	22.2837	22.1908	22.0831	22.4489	21.6805	22.0312
	0.00847207	-0.00315412	P38647	P38647	Stress-70 protein, mitochondrial	Hspa9	17	17	17	29.7	29.7	29.7	73.46	0	173.29	1479100000	456	14	15	16	14	15	15	15	15	16	16	16	16	14	15	16	14	15	15	15	15	16	16	16	16	26.9271	27.2826	27.188	27.0517	27.2537	27.1017	27.0483	27.1155
	2.00422	0.170468	P40124;B1ARS0	P40124	Adenylyl cyclase-associated protein 1	Cap1	14	14	13	52.3	52.3	50.6	51.564	0	323.31	1158900000	403	12	13	12	14	13	11	12	14	13	13	13	14	11	12	11	13	12	10	11	13	12	12	12	13	26.8956	26.8937	26.8939	26.7428	26.6527	26.7763	26.8189	26.8091
	0.19719	-0.0361646	P40142;A0A286YE28	P40142;A0A286YE28	Transketolase	Tkt	24	24	24	59.1	59.1	59.1	67.63	0	296.38	2008300000	567	23	21	22	20	23	19	20	19	22	20	19	21	23	21	22	20	23	19	20	19	22	20	19	21	27.6243	27.4502	27.428	27.5095	27.4979	27.6036	27.8311	27.911
	0.493885	-0.147347	P40240	P40240	CD9 antigen	Cd9	2	2	2	14.2	14.2	14.2	25.258	0	7.5699	69148000	14	1	2	2	1	2	1	1	2	2	2	2	2	1	2	2	1	2	1	1	2	2	2	2	2	22.6198	22.5193	22.4258	22.7829	22.7899	22.4341	23.1837	22.6668
	1.97051	0.365349	P40336;P40336-2	P40336;P40336-2	Vacuolar protein sorting-associated protein 26A	Vps26a	3	3	3	14.7	14.7	14.7	38.113	0	11.636	86451000	7	3	2	2	3	3	3	3	1	3	3	3	3	3	2	2	3	3	3	3	1	3	3	3	3	23.2197	23.1649	23.3985	22.8546	22.9751	22.8574	22.67	22.8879
	0.19442	0.0378342	P42208;E9Q3V6;F6WYM0;D3YYB1;D3Z3C0;D3Z1S1;F6UKN5;D3YZU7;D3YV76	P42208;E9Q3V6;F6WYM0;D3YYB1;D3Z3C0	Septin-2	2018-09-02	8	8	8	36.8	36.8	36.8	41.525	0	72.713	235630000	77	6	6	7	7	6	5	6	5	7	7	5	6	6	6	7	7	6	5	6	5	7	7	5	6	24.4767	24.6041	24.602	24.4005	24.5963	24.5725	24.5075	24.5123
	0.464017	0.154358	P42669	P42669	Transcriptional activator protein Pur-alpha	Pura	7	7	7	31.8	31.8	31.8	34.883	0	236.35	783590000	163	6	4	6	7	6	6	6	6	6	5	7	7	6	4	6	7	6	6	6	6	6	5	7	7	26.3242	26.3652	26.2374	26.37	26.1985	25.8953	26.3684	26.2629
	0.266015	-0.0524909	P42932;H3BL49;H3BJB6;H3BLL1;H3BKG2;H3BKR8	P42932;H3BL49	T-complex protein 1 subunit theta	Cct8	22	22	22	47.8	47.8	47.8	59.555	0	109.17	668730000	198	21	18	19	20	17	18	17	17	18	20	17	18	21	18	19	20	17	18	17	17	18	20	17	18	25.9091	25.9871	26.094	25.9429	26.1418	26.0629	25.885	25.9533
	0.566655	0.0577246	P43006;P43006-2	P43006;P43006-2	Excitatory amino acid transporter 2	Slc1a2	14	14	2	26.9	26.9	2.3	62.03	0	323.31	8585300000	1216	14	14	14	14	14	14	14	14	14	14	14	14	2	2	2	2	2	2	2	2	2	2	2	2	29.7459	29.6321	29.6001	29.6051	29.5834	29.6164	29.6716	29.5798
	3.18643	-0.168338	Q9DCW5;P43024	Q9DCW5;P43024	Cytochrome c oxidase subunit 6A, mitochondrial;Cytochrome c oxidase subunit 6A1, mitochondrial	Cox6a1	4	4	4	60.7	60.7	60.7	12.483	0	130.31	2109300000	248	4	4	4	4	4	4	4	4	4	4	4	4	4	4	4	4	4	4	4	4	4	4	4	4	27.6136	27.5617	27.5633	27.7429	27.7451	27.7556	27.6175	27.7959
	1.15403	-0.275368	P43274	P43274	Histone H1.4	Hist1h1e	5	5	3	22.4	22.4	13.2	21.977	0	24.168	632050000	168	5	5	4	5	5	5	5	4	5	5	5	5	3	3	2	3	3	3	3	2	3	3	3	3	25.7293	25.5519	25.4449	25.995	25.7395	25.8177	25.9292	25.5292
	1.36508	-0.385367	P43275	P43275	Histone H1.1	Hist1h1a	2	1	1	14.1	9.9	9.9	21.785	0	10.708	15847000	8	1	1	1	1	1	1	1	1	1	1	1	1	1	1	1	1	1	1	1	1	1	1	1	1	20.6846	20.3824	20.2626	20.7485	20.8768	20.8604	20.5766	20.6999
	0.340031	0.0786114	P45376;D3YVJ7	P45376	Aldose reductase	Akr1b1	6	6	6	27.8	27.8	27.8	35.732	0	28.953	365750000	97	6	6	6	6	6	6	6	6	6	6	6	6	6	6	6	6	6	6	6	6	6	6	6	6	25.1609	25.4038	25.3405	25.2821	25.2881	25.0992	25.0038	25.2262
	0.274926	0.144683	P45591;A0A1Y7VJ71	P45591	Cofilin-2	Cfl2	6	5	5	45.2	38.6	38.6	18.709	0	77.113	88192000	32	5	4	4	4	4	4	2	5	4	3	3	3	5	4	4	4	4	4	2	5	4	3	3	3	23.4964	23.1325	22.8956	23.1848	23.1086	22.797	23.3163	23.1034
	0.129973	-0.161073	P45878	P45878	Peptidyl-prolyl cis-trans isomerase FKBP2	Fkbp2	2	2	2	18.6	18.6	18.6	15.344	0	6.4724	63962000	5	2	2	2	2	2	2	2	2	2	2	2	2	2	2	2	2	2	2	2	2	2	2	2	2	22.8572	23.0612	22.1102	23.5099	22.3226	22.6792	22.1367	22.0805
	0.0493538	0.0392361	P45952	P45952	Medium-chain specific acyl-CoA dehydrogenase, mitochondrial	Acadm	2	2	2	11.6	11.6	11.6	46.481	0	34.489	18558000	12	1	1	1	1	1	1	1	1	1	2	1	1	1	1	1	1	1	1	1	1	1	2	1	1	20.7826	20.272	21.1051	20.4428	20.7339	20.8652	20.9596	20.8869
	1.92651	0.10618	P46096	P46096	Synaptotagmin-1	Syt1	19	19	12	44.9	44.9	32.5	47.417	0	270.4	5884800000	964	17	17	17	17	17	17	18	17	18	18	18	18	10	10	10	10	10	10	11	10	11	11	11	11	29.077	29.0565	29.065	29.0037	28.9231	28.9533	29.0487	29.0407
	0.289606	0.0479558	P46460;G3UX86;G3UX98	P46460	Vesicle-fusing ATPase	Nsf	45	45	44	70.3	70.3	69.4	82.613	0	323.31	8191700000	1360	39	40	39	39	39	37	39	35	41	38	36	40	38	39	38	38	38	36	38	34	40	37	36	39	29.6635	29.6918	29.5159	29.6309	29.5009	29.5955	29.664	29.5195
	0.939064	-0.217522	P46471;Q8BVQ9	P46471;Q8BVQ9	26S protease regulatory subunit 7	Psmc2	9	9	9	30.5	30.5	30.5	48.647	0	34.218	130270000	23	7	5	7	7	6	6	6	5	6	6	5	7	7	5	7	7	6	6	6	5	6	6	5	7	23.6352	23.5256	23.4583	23.7736	23.9134	23.5846	23.5417	22.983
	0.890381	-0.144243	P46638;G3UY29;E9Q3P9;F8WGS1;G3UZD3;P62492;G3UZL4;E9Q6B3	P46638;G3UY29;E9Q3P9;F8WGS1;G3UZD3;P62492;G3UZL4	Ras-related protein Rab-11B;Ras-related protein Rab-11A	Rab11b;Rab11a	9	9	9	49.5	49.5	49.5	24.489	0	36.635	449270000	101	7	8	8	7	8	6	8	6	8	8	7	6	7	8	8	7	8	6	8	6	8	8	7	6	25.2455	25.4928	25.3789	25.4678	25.5425	25.5396	25.3969	25.5069
	0.181045	-0.0361258	P46660;P31001	P46660	Alpha-internexin	Ina	23	21	20	56.5	52.5	50.7	55.382	0	323.31	2234000000	707	19	19	21	19	18	18	19	19	20	20	20	19	18	18	20	18	18	17	18	18	19	19	19	18	27.7648	27.5384	27.6566	27.6134	27.7396	27.7152	27.837	27.7479
	0.165784	-0.0807171	P46664	P46664	Adenylosuccinate synthetase isozyme 2	Adss	7	7	7	20.8	20.8	20.8	50.02	0	30.152	76017000	28	2	2	5	3	4	3	5	3	2	4	3	4	2	2	5	3	4	3	5	3	2	4	3	4	22.8091	23.1588	22.9094	23.1808	22.7377	23.2009	22.8938	22.5535
	0.261558	0.0970872	P47708;A0A0J9YV12;P70169	P47708	Rabphilin-3A	Rph3a	14	14	14	31.6	31.6	31.6	75.488	0	81.944	477380000	121	12	10	9	9	12	7	13	11	10	12	10	12	12	10	9	9	12	7	13	11	10	12	10	12	25.5731	25.4771	25.816	25.3402	25.7152	25.5195	25.2144	25.3551
	0.532165	-0.0982361	P47738;A0A0G2JEU1;A0A0G2JFQ0;A0A0G2JF60;D3YYF3;Q62148;G3UWP3;Q9JHW9	P47738;A0A0G2JEU1	Aldehyde dehydrogenase, mitochondrial	Aldh2	19	19	18	51.3	51.3	49.7	56.537	0	162.28	818220000	245	17	15	13	17	14	14	15	16	17	16	15	16	16	14	12	16	14	14	15	16	17	16	15	16	26.1412	26.1867	25.9812	26.2638	26.2425	26.0974	26.2726	26.6756
	0.206816	0.123041	P47746	P47746	Cannabinoid receptor 1	Cnr1	1	1	1	5.3	5.3	5.3	52.83	0.0089172	2.3321	41084000	5	1	1	1	1	1	1	1	1	1	1	1	1	1	1	1	1	1	1	1	1	1	1	1	1	22.0198	22.2629	22.7551	22.0718	22.3347	22.2622	21.2352	21.9383
	0.258081	0.114897	P47754;D6RCW7;A0A0N4SVM0	P47754;D6RCW7;A0A0N4SVM0	F-actin-capping protein subunit alpha-2	Capza2	10	10	9	51.4	51.4	47.9	32.967	0	251.1	1248300000	281	9	8	8	8	10	8	9	9	9	8	9	10	8	7	7	7	9	7	8	8	8	7	8	9	26.7388	27.2636	26.8304	26.9406	26.6943	26.8532	27.0399	26.9869
	0.247679	0.0745029	P47757-2;A2AMW0;P47757-4;P47757;F7CAZ6;A0A0A0MQI9;F6YHZ8	P47757-2;A2AMW0;P47757-4;P47757;F7CAZ6;A0A0A0MQI9;F6YHZ8	F-actin-capping protein subunit beta	Capzb	12	12	12	54.4	54.4	54.4	30.628	0	128.55	1002400000	288	11	11	11	12	11	10	10	11	11	12	10	11	11	11	11	12	11	10	10	11	11	12	10	11	26.8152	26.5408	26.8152	26.5046	26.7633	26.6798	26.3989	26.5787
	0.0258611	0.0134735	P47791-2;P47791	P47791-2;P47791	Glutathione reductase, mitochondrial	Gsr	5	5	5	18.8	18.8	18.8	51.073	0	16.968	122410000	37	3	3	3	3	3	2	3	3	3	4	3	2	3	3	3	3	3	2	3	3	3	4	3	2	23.631	23.6345	23.4743	23.5779	23.8488	23.2727	23.428	23.604
	0.284658	-0.0605704	P47809;B1ATL6;M0QW52;M0QWR0;M0QWG5	P47809	Dual specificity mitogen-activated protein kinase kinase 4	Map2k4	7	7	7	26.2	26.2	26.2	44.113	0	42.889	218630000	61	7	7	6	7	6	6	7	7	6	6	7	5	7	7	6	7	6	6	7	7	6	6	7	5	24.3617	24.3093	24.4183	24.3721	24.5803	24.3186	24.2912	24.4906
	1.35964	0.144927	P47857;P47857-2;P47857-3;A0A2R8VHV2;A0A2R8VHA5	P47857;P47857-2;P47857-3	ATP-dependent 6-phosphofructokinase, muscle type	Pfkm	25	25	22	45.6	45.6	41.9	85.268	0	254.78	1757300000	408	23	23	23	22	21	22	22	22	20	24	24	22	20	20	20	19	19	19	19	19	18	21	21	20	27.4403	27.3886	27.3607	27.3295	27.1771	27.2483	27.3642	27.5738
	0.564626	0.0668653	P47911;A0A0J9YU32	P47911	60S ribosomal protein L6	Rpl6	7	7	7	26.7	26.7	26.7	33.509	0	32.913	173620000	121	5	5	5	5	5	4	4	6	5	5	5	6	5	5	5	5	5	4	4	6	5	5	5	6	24.1414	24.0552	24.1613	23.9782	24.0581	24.1209	23.9935	23.7854
	1.00015	-0.189402	P47955;E9Q3T0	P47955	60S acidic ribosomal protein P1	Rplp1	3	3	3	79.8	79.8	79.8	11.475	0	51.144	341910000	27	2	3	3	3	2	2	2	3	3	2	3	3	2	3	3	3	2	2	2	3	3	2	3	3	25.1531	24.9148	24.8704	25.1743	25.1892	25.143	25.4167	25.1176
	0.341905	-0.0868855	P47962;D3YYV8	P47962;D3YYV8	60S ribosomal protein L5	Rpl5	5	5	5	23.2	23.2	23.2	34.4	0	17.855	121130000	41	4	4	4	5	4	4	4	5	5	4	4	4	4	4	4	5	4	4	4	5	5	4	4	4	23.5839	23.4821	23.7258	23.6701	23.8255	23.5568	23.7932	23.6251
	1.0405	-0.212888	P47963	P47963	60S ribosomal protein L13	Rpl13	2	2	2	10	10	10	24.305	0	11.5	128490000	22	2	2	2	2	2	2	2	2	2	2	2	2	2	2	2	2	2	2	2	2	2	2	2	2	23.5517	23.4931	23.5363	23.6273	23.9277	23.6648	23.4359	23.7111
	0.671101	-0.236268	P48024;A0A1L1SSA3;J3QPZ8;Q9CXU9;J3QN87	P48024	Eukaryotic translation initiation factor 1	Eif1	5	5	5	54	54	54	12.746	0	36.087	139780000	33	2	3	3	1	3	2	3	4	4	4	5	3	2	3	3	1	3	2	3	4	4	4	5	3	23.5582	23.6632	23.8672	23.6764	24.1124	24.0086	23.7504	23.9061
	0.523797	-0.0898552	P48036;A0A0G2JGQ0	P48036	Annexin A5	Anxa5	12	12	12	41.7	41.7	41.7	35.752	0	108.79	469500000	104	12	11	10	10	12	12	12	11	11	12	10	10	12	11	10	10	12	12	12	11	11	12	10	10	25.472	25.4431	25.5268	25.4643	25.7061	25.5412	25.4903	25.4922
	0.12135	0.0295703	P48318;D3Z1L8;D3Z5S3	P48318;D3Z1L8;D3Z5S3	Glutamate decarboxylase 1	Gad1	6	6	6	18.2	18.2	18.2	66.648	0	53.64	218510000	67	4	4	4	5	4	4	5	6	6	5	4	5	4	4	4	5	4	4	5	6	6	5	4	5	24.5105	24.4909	24.2345	24.3851	24.383	24.3789	24.6581	24.3572
	0.884894	-0.182007	P48320	P48320	Glutamate decarboxylase 2	Gad2	8	8	8	27.9	27.9	27.9	65.223	0	57.618	501320000	76	5	6	5	6	4	5	6	6	5	5	7	6	5	6	5	6	4	5	6	6	5	5	7	6	25.4297	25.5783	25.3677	25.7597	25.653	25.5089	25.9655	25.658
	0.599944	-0.0958481	P48678-2;P48678;P48678-3;D3YUF7	P48678-2;P48678;P48678-3	Prelamin-A/C;Lamin-A/C	Lmna	9	9	9	19.3	19.3	19.3	65.445	0	45.664	87338000	13	5	5	5	6	4	6	6	5	6	8	6	6	5	5	5	6	4	6	6	5	6	8	6	6	22.9298	23.0959	23.093	23.1691	23.0448	23.1925	22.9225	23.1305
	0.0758476	0.00879161	P48722;P48722-2;E0CY23;A0A0N4SVU2;A0A0N4SW76	P48722;P48722-2;E0CY23	Heat shock 70 kDa protein 4L	Hspa4l	23	21	21	36.4	32.8	32.8	94.381	0	121.5	792580000	189	18	17	17	15	17	14	19	20	18	19	19	19	18	17	17	15	17	14	19	20	18	19	19	19	26.2049	26.2058	26.3075	26.2142	26.2027	26.275	26.2328	26.1785
	0.387731	-0.0503356	P48758;A0A1B0GRG8	P48758	Carbonyl reductase [NADPH] 1	Cbr1	11	11	10	50.2	50.2	47.3	30.641	0	53.958	396940000	161	11	10	10	11	10	9	10	10	9	11	11	9	10	9	9	10	10	9	9	9	9	10	10	9	25.194	25.0349	25.145	25.1215	25.2157	25.1877	25.3001	25.1215
	0.514241	0.514882	P48771	P48771	Cytochrome c oxidase subunit 7A2, mitochondrial	Cox7a2	1	1	1	15.7	15.7	15.7	9.2908	0	11.247	232720000	26	1	1	1	1	1	1	1	1	1	1	1	1	1	1	1	1	1	1	1	1	1	1	1	1	23.8504	25.2493	24.9039	23.9043	24.3098	24.2449	23.8695	25.5485
	0.363965	-0.0528361	P48774;E9PVM7;E9PV63;E9Q024;E9Q5L9	P48774;E9PVM7;E9PV63	Glutathione S-transferase Mu 5	Gstm5	15	14	14	68.3	64.3	64.3	26.635	0	118.55	1068200000	217	14	13	13	14	12	13	14	13	14	13	14	14	14	13	13	14	12	13	14	13	14	13	14	14	26.7465	26.7575	26.6883	26.8096	26.6751	26.8662	26.9524	26.8022
	0.0952916	0.00908852	P48962;Q3V132	P48962	ADP/ATP translocase 1	Slc25a4	23	23	14	72.5	72.5	50.7	32.904	0	323.31	8814200000	1492	20	18	19	19	20	17	19	18	18	21	19	18	11	11	11	11	12	10	11	11	11	14	12	11	29.6376	29.6774	29.718	29.7106	29.671	29.6242	29.6801	29.5658
	0.457322	-0.29982	Q5EBP8;P49312;P49312-2	Q5EBP8;P49312;P49312-2	Heterogeneous nuclear ribonucleoprotein A1;Heterogeneous nuclear ribonucleoprotein A1, N-terminally processed	Hnrnpa1	6	6	6	17.7	17.7	17.7	38.833	0	13.412	93969000	19	5	4	5	6	5	4	4	6	5	6	5	6	5	4	5	6	5	4	4	6	5	6	5	6	22.9814	23.4194	23.5098	23.7758	23.1459	23.8883	22.9883	22.3981
	1.29254	-0.281243	P49442;E0CYQ4;E0CX64;H3BK26	P49442	Inositol polyphosphate 1-phosphatase	Inpp1	4	4	4	13.6	13.6	13.6	43.346	0	12.233	51996000	19	2	2	3	3	3	3	3	3	2	3	2	2	2	2	3	3	3	3	3	3	2	3	2	2	22.2105	22.1416	22.1384	22.287	22.6279	22.4192	22.3879	22.5003
	0.00443193	-0.00236956	P49443;Q9EQE2;A0A1Y7VJZ4;Q99NF7;P36993-2;P36993-4;P36993;P36993-3;P36993-5	P49443;Q9EQE2	Protein phosphatase 1A	Ppm1a	6	6	6	24.3	24.3	24.3	42.432	0	13.126	37540000	4	2	2	2	3	3	3	5	2	3	3	2	3	2	2	2	3	3	3	5	2	3	3	2	3	21.982	21.9199	21.7431	22.055	21.5649	22.0323	22.05	21.776
	0.356487	-0.0642878	P49615;A0A0G2JDL3	P49615;A0A0G2JDL3	Cyclin-dependent-like kinase 5	Cdk5	9	9	9	39.4	39.4	39.4	33.288	0	51.789	237640000	78	9	8	7	7	7	8	7	8	7	9	9	8	9	8	7	7	7	8	7	8	7	9	9	8	24.5051	24.3394	24.4446	24.3793	24.5466	24.556	24.4746	24.6025
	1.4325	-0.301858	P49722;Q8BKE0	P49722;Q8BKE0	Proteasome subunit alpha type-2	Psma2	5	5	5	29.5	29.5	29.5	25.926	0	68.158	290080000	35	4	4	5	5	5	3	4	4	5	5	5	5	4	4	5	5	5	3	4	4	5	5	5	5	24.5094	24.4705	24.7329	24.7734	24.9594	24.8855	24.9364	25.0085
	0.198105	0.0592372	P50114	P50114	Protein S100-B	S100b	3	3	3	40.2	40.2	40.2	10.728	0	97.98	669480000	68	3	3	3	3	3	3	3	3	3	3	3	3	3	3	3	3	3	3	3	3	3	3	3	3	26.0142	25.906	26.2385	26.02	26.0825	25.8785	26.0498	26.1773
	0.964151	-0.325871	P50153	P50153	Guanine nucleotide-binding protein G(I)/G(S)/G(O) subunit gamma-4	Gng4	2	2	2	44	44	44	8.4047	0	10.943	135810000	38	2	2	2	2	2	2	2	2	2	2	2	2	2	2	2	2	2	2	2	2	2	2	2	2	23.6298	23.4784	23.1035	23.7148	23.6974	23.7771	23.8429	23.9015
	0.82062	-0.143745	P50247;A2ALT5	P50247	Adenosylhomocysteinase	Ahcy	13	13	13	39.6	39.6	39.6	47.688	0	55.581	250770000	52	12	12	10	12	9	9	11	10	12	10	12	10	12	12	10	12	9	9	11	10	12	10	12	10	24.4281	24.3309	24.5692	24.5326	24.6701	24.5568	24.7606	24.7202
	0.731906	-0.0730222	P50396;D6RI86;B7FAU8	P50396	Rab GDP dissociation inhibitor alpha	Gdi1	26	20	20	66.9	51.9	51.9	50.521	0	323.31	5393400000	698	19	20	19	19	20	19	20	19	19	20	19	19	19	20	19	19	20	19	20	19	19	20	19	19	29.0531	28.942	28.9637	29.1202	29.0325	29.0251	29.1555	29.0695
	0.231322	0.0446211	P50516;P50516-2;D3Z1B9;D3YWH3;D3YZ23	P50516;P50516-2	V-type proton ATPase catalytic subunit A	Atp6v1a	32	32	32	65.5	65.5	65.5	68.325	0	323.31	6343100000	1425	29	28	28	29	28	28	28	29	28	27	28	30	29	28	28	29	28	28	28	29	28	27	28	30	29.3284	29.2976	29.3082	29.417	29.1937	29.1897	29.2892	29.2545
	0.180777	-0.0187969	P50518;A0A0N4SW07;A0A0N4SW34;A0A0N4SWA3;Q9D593	P50518;A0A0N4SW07	V-type proton ATPase subunit E 1	Atp6v1e1	14	14	14	54	54	54	26.157	0	222.31	2283300000	524	14	13	12	13	13	12	13	14	13	14	14	13	14	13	12	13	13	12	13	14	13	14	14	13	27.6915	27.759	27.8283	27.7779	27.7751	27.7822	27.7858	27.7307
	0.452318	-0.159414	P50544;B1AR28	P50544;B1AR28	Very long-chain specific acyl-CoA dehydrogenase, mitochondrial	Acadvl	3	3	3	7.6	7.6	7.6	70.875	0	12.351	59777000	11	3	3	2	2	2	1	2	2	3	3	3	3	3	3	2	2	2	1	2	2	3	3	3	3	22.168	22.6132	22.5797	22.5807	22.5463	22.7122	22.7191	22.9142
	1.23037	0.162954	Q3TGU7;P50580-2;P50580	Q3TGU7;P50580-2;P50580	Proliferation-associated protein 2G4	Pa2g4	5	5	5	16.2	16.2	16.2	43.698	0	10.164	46011000	10	3	3	4	3	4	4	3	3	5	4	1	3	3	3	4	3	4	4	3	3	5	4	1	3	22.3226	22.3944	22.2258	22.0748	22.1816	22.1975	22.1723	22.0638
	1.50516	0.117649	P51150;A0A0N4SVG9;A0A0N4SVR6	P51150;A0A0N4SVG9	Ras-related protein Rab-7a	Rab7a	12	12	12	69.1	69.1	69.1	23.489	0	83.542	496540000	166	10	9	9	9	11	7	8	11	10	10	11	10	10	9	9	9	11	7	8	11	10	10	11	10	25.6211	25.7158	25.6253	25.5721	25.5284	25.5086	25.6126	25.5852
	2.5053	0.0849152	P51863	P51863	V-type proton ATPase subunit d 1	Atp6v0d1	11	11	11	41	41	41	40.301	0	134.18	1782100000	247	10	9	10	9	10	10	8	10	9	9	10	10	10	9	10	9	10	10	8	10	9	9	10	10	27.5095	27.543	27.5178	27.4235	27.4382	27.4539	27.5031	27.5144
	0.00387164	-0.00117938	P51881	P51881	ADP/ATP translocase 2;ADP/ATP translocase 2, N-terminally processed	Slc25a5	19	10	10	55	27.9	27.9	32.931	0	165.26	1777900000	347	10	10	10	10	10	10	10	10	10	10	10	10	10	10	10	10	10	10	10	10	10	10	10	10	27.5842	27.2924	27.4361	27.4724	27.3344	27.5094	27.3583	27.2229
	0.27663	-0.0949249	P52196	P52196	Thiosulfate sulfurtransferase	Tst	8	8	8	33.3	33.3	33.3	33.466	0	52.713	320310000	95	7	7	6	8	7	7	7	7	8	7	7	7	7	7	6	8	7	7	7	7	8	7	7	7	24.8866	24.9547	24.6716	25.0688	24.7187	25.0101	24.966	25.1545
	0.000926775	-0.00102425	P52480	P52480	Pyruvate kinase PKM	Pkm	29	1	1	68.4	4.1	4.1	57.844	0	10.054	32505000	10	1	1	1	1	1	1	1	1	1	1	1	1	1	1	1	1	1	1	1	1	1	1	1	1	21.9173	20.8336	21.0303	20.9876	21.4047	21.3919	22.1004	22.1448
	0.836509	-0.0828412	P52480-2;A0A1L1SU37;A0A1L1SQV8;A0A1L1SSN6;A0A1L1STV8;A0A1L1SUV0;A0A1L1ST52;A0A1L1SVH2;E9Q509;G3X925	P52480-2	Pyruvate kinase PKM	Pkm	33	33	5	75.5	75.5	11.3	57.984	0	323.31	20089000000	1887	31	31	30	32	31	30	31	31	31	31	31	30	4	3	4	4	4	4	5	4	4	5	4	4	30.7031	30.8052	30.8161	30.8038	30.9009	30.8683	30.8793	30.8533
	0.139285	0.0521088	P52760	P52760	Ribonuclease UK114	Hrsp12	5	5	5	43	43	43	14.255	0	52.223	341830000	64	4	4	5	5	5	5	4	4	4	4	4	4	4	4	5	5	5	5	4	4	4	4	4	4	25.165	24.8466	25.2035	24.9788	24.9065	25.1735	25.3864	25.0515
	0.460602	-0.0983785	P53395	P53395	Lipoamide acyltransferase component of branched-chain alpha-keto acid dehydrogenase complex, mitochondrial	Dbt	2	2	2	6	6	6	53.246	0	6.2852	32418000	2	2	2	2	2	2	2	1	2	2	2	2	2	2	2	2	2	2	2	1	2	2	2	2	2	21.8117	21.5482	21.6377	21.6638	21.8147	21.8142	21.8894	21.7072
	0.579729	0.101185	P53994;G3UXQ7;G3V022;A0A1D5RMH1	P53994	Ras-related protein Rab-2A	Rab2a	9	9	5	47.2	47.2	24.1	23.547	0	107.95	505280000	96	9	9	9	8	7	7	8	6	8	7	7	6	5	5	5	5	4	4	5	3	5	4	4	3	25.8072	25.5747	25.7302	25.5569	25.6762	25.5754	25.7292	25.5804
	0.474244	-0.1264	P54071;D6RIL6;A0A0U1RP68;A0A0U1RPR1	P54071	Isocitrate dehydrogenase [NADP], mitochondrial	Idh2	14	14	13	37.6	37.6	35.6	50.906	0	56.304	437650000	181	12	12	13	12	13	11	11	13	13	12	12	12	11	11	12	11	12	10	10	12	12	11	11	11	25.1938	25.3587	25.4716	25.3024	25.5442	25.5567	25.3063	25.562
	0.665753	0.216121	P54728	P54728	UV excision repair protein RAD23 homolog B	Rad23b	7	7	7	28.1	28.1	28.1	43.512	0	22.18	175670000	37	7	6	6	6	5	5	4	6	6	7	7	6	7	6	6	6	5	5	4	6	6	7	7	6	24.3627	24.3027	24.091	23.9348	24.2788	23.8945	24.2759	23.9685
	0.295918	-0.131472	P55264;P55264-2;A0A286YCD7;A0A286YCN3	P55264;P55264-2;A0A286YCD7	Adenosine kinase	Adk	6	6	6	28	28	28	40.148	0	32.608	111380000	37	5	4	5	5	4	5	5	5	5	4	5	5	5	4	5	5	4	5	5	5	5	4	5	5	23.3404	23.3357	23.628	23.2738	23.7846	23.6401	23.3325	23.8259
	0.123881	-0.0944557	P55302	P55302	Alpha-2-macroglobulin receptor-associated protein	Lrpap1	2	2	2	6.7	6.7	6.7	42.215	0	8.8727	18341000	11	1	1	1	1	2	1	1	1	2	1	2	2	1	1	1	1	2	1	1	1	2	1	2	2	20.5088	20.5217	21.0595	20.4886	20.6859	21.1989	20.6472	21.138
	0.479414	-0.154648	P56135;F8WHP8	P56135;F8WHP8	ATP synthase subunit f, mitochondrial	Atp5j2	4	4	4	36.4	36.4	36.4	10.344	0	28.23	1064300000	99	3	4	3	4	4	4	3	3	3	4	3	4	3	4	3	4	4	4	3	3	3	4	3	4	26.3216	26.7557	26.671	26.6915	26.6944	26.8263	26.6831	26.91
	0.358584	-0.214878	P56212;E9Q827;P56212-2;E9Q4B9;E9PXD7	P56212;E9Q827;P56212-2;E9Q4B9	cAMP-regulated phosphoprotein 19	Arpp19	4	4	3	63.4	63.4	53.6	12.293	0	15.61	110290000	35	4	4	3	2	3	3	4	3	3	4	4	3	3	3	2	1	2	2	3	2	2	3	3	2	23.6673	22.8433	23.3881	23.4408	23.6365	23.466	23.2809	23.0641
	0.0669915	-0.0447184	P56380	P56380	Bis(5-nucleosyl)-tetraphosphatase [asymmetrical]	Nudt2	5	5	5	51.7	51.7	51.7	16.989	0	15.461	81211000	19	4	5	4	3	4	3	4	3	3	4	4	3	4	5	4	3	4	3	4	3	3	4	4	3	22.8704	22.7015	22.9951	23.137	23.0967	22.4675	23.2033	23.3301
	0.478302	0.219548	P56382	P56382	ATP synthase subunit epsilon, mitochondrial	Atp5e	1	1	1	15.4	15.4	15.4	5.8378	0.003956	2.5687	24314000	36	1	1	1	1	1	1	1	1	1	1	1	1	1	1	1	1	1	1	1	1	1	1	1	1	21.6668	21.4706	21.2416	21.4293	20.9288	21.3624	21.5516	20.9224
	0.699426	-0.268452	P56387	P56387	Dynein light chain Tctex-type 3	Dynlt3	4	4	4	78.4	78.4	78.4	12.957	0	19.206	112480000	28	3	3	3	2	3	2	2	2	2	3	3	2	3	3	3	2	3	2	2	2	2	3	3	2	23.381	23.6497	23.1082	23.515	23.642	23.7873	23.1941	22.6751
	0.459596	-0.150536	P56391;A0A140LIU3	P56391;A0A140LIU3	Cytochrome c oxidase subunit 6B1	Cox6b1	5	5	5	53.5	53.5	53.5	10.071	0	88.71	1600200000	231	5	5	5	4	5	5	5	5	5	4	5	5	5	5	5	4	5	5	5	5	5	4	5	5	27.1452	27.0856	27.3769	27.5728	27.2527	27.2338	27.1839	27.2109
	0.339087	-0.0523637	Q3U4W8;P56399;D3Z4K7;D3YYA5	Q3U4W8;P56399	Ubiquitin carboxyl-terminal hydrolase;Ubiquitin carboxyl-terminal hydrolase 5	Usp5	17	17	17	35.7	35.7	35.7	93.354	0	224.64	1143100000	210	16	15	16	15	15	12	15	14	15	16	15	16	16	15	16	15	15	12	15	14	15	16	15	16	26.8307	26.6378	26.7169	26.8131	26.8098	26.7196	26.8029	26.8373
	0.614083	0.0962632	P56480	P56480	ATP synthase subunit beta, mitochondrial	Atp5b	26	26	26	71.1	71.1	71.1	56.3	0	323.31	27383000000	2577	26	26	26	25	26	25	26	25	26	26	26	25	26	26	26	25	26	25	26	25	26	26	26	25	31.2111	31.3514	31.1495	31.125	31.2119	31.0862	31.3069	31.3368
	0.108624	0.0288175	P56564;D3YY51;A0A1W2P762	P56564	Excitatory amino acid transporter 1	Slc1a3	8	8	6	22.5	22.5	18	59.622	0	214.29	3973400000	370	7	8	7	7	7	6	6	7	7	6	6	6	5	6	5	5	5	4	4	5	5	4	4	4	28.5994	28.5536	28.7715	28.4842	28.6323	28.7215	28.5611	28.7202
	2.5418	0.243633	P57746	P57746	V-type proton ATPase subunit D	Atp6v1d	12	12	12	50.6	50.6	50.6	28.369	0	110.79	573630000	202	12	10	10	11	11	10	9	11	11	11	12	11	12	10	10	11	11	10	9	11	11	11	12	11	25.8727	25.8331	25.8745	25.6405	25.6612	25.5477	25.8068	25.9233
	0.35522	0.0954132	P57759;F8WJI4;F8WIM7;D6RG87	P57759	Endoplasmic reticulum resident protein 29	Erp29	4	4	4	21	21	21	28.823	0	9.0941	44511000	11	3	2	4	2	3	1	2	2	3	3	2	2	3	2	4	2	3	1	2	2	3	3	2	2	22.2853	22.2678	22.0219	22.0821	21.9783	22.2283	22.0365	22.0342
	0.107363	-0.00600115	P58252	P58252	Elongation factor 2	Eef2	31	31	31	43.7	43.7	43.7	95.313	0	323.31	1851600000	596	29	29	29	29	29	28	27	30	29	30	29	29	29	29	29	29	29	28	27	30	29	30	29	29	27.4072	27.3977	27.4258	27.4253	27.3808	27.4426	27.4375	27.292
	0.235014	-0.0384076	P58281;P58281-2;H7BX01;E0CXD1;F6U775;P58682	P58281;P58281-2;H7BX01;E0CXD1	Dynamin-like 120 kDa protein, mitochondrial;Dynamin-like 120 kDa protein, form S1	Opa1	24	24	24	36	36	36	111.34	0	153.99	881360000	275	20	19	19	20	21	20	20	19	21	19	18	21	20	19	19	20	21	20	20	19	21	19	18	21	26.4922	26.3392	26.3645	26.3503	26.484	26.4768	26.3818	26.403
	0.222148	0.113428	Q9JKB1;P58321;A0A2I3BQ39	Q9JKB1;P58321;A0A2I3BQ39	Ubiquitin carboxyl-terminal hydrolase isozyme L3;Ubiquitin carboxyl-terminal hydrolase isozyme L4	Uchl3;Uchl4	3	3	3	18.7	18.7	18.7	26.151	0	12.617	66952000	39	2	1	3	3	1	1	2	3	1	2	2	3	2	1	3	3	1	1	2	3	1	2	2	3	22.6347	22.7277	22.8685	22.3122	22.6176	22.9607	22.773	22.8634
	3.19575	-0.167744	P58389;A2AWE9;B7ZDE0;A2AWF0;F6Z6I0	P58389;A2AWE9	Serine/threonine-protein phosphatase 2A activator	Ppp2r4	7	7	7	44.3	44.3	44.3	36.71	0	63.536	490450000	108	7	7	7	7	7	6	6	5	6	6	6	6	7	7	7	7	7	6	6	5	6	6	6	6	25.5425	25.5775	25.536	25.6999	25.74	25.7193	25.6114	25.4102
	0.44078	-0.358386	Q8BVV6;P59325;A0A1Y7VNP4;A0A1Y7VJG2;A0A1Y7VKT5	Q8BVV6;P59325;A0A1Y7VNP4;A0A1Y7VJG2	Eukaryotic translation initiation factor 5	Eif5	6	6	6	20	20	20	42.586	0	37.702	116810000	31	5	4	5	4	4	4	4	4	5	4	5	5	5	4	5	4	4	4	4	4	5	4	5	5	22.9785	23.9296	23.2078	24.081	23.3916	23.7184	23.5821	23.5342
	1.67033	0.213208	P59999;Q3TX55;E9PWA7	P59999;Q3TX55;E9PWA7	Actin-related protein 2/3 complex subunit 4	Arpc4	9	9	9	66.7	66.7	66.7	19.667	0	96.881	740280000	236	8	8	9	9	9	7	8	9	9	9	9	9	8	8	9	9	9	7	8	9	9	9	9	9	26.3851	26.3281	26.3023	26.1757	26.02	26.1801	26.0891	26.1053
	0.542617	0.110175	P60202;P60202-2	P60202;P60202-2	Myelin proteolipid protein	Plp1	9	9	9	38.6	38.6	38.6	30.077	0	122.97	15061000000	866	8	9	8	8	8	8	7	8	8	9	8	8	8	9	8	8	8	8	7	8	8	9	8	8	30.6231	30.3491	30.5631	30.3739	30.4685	30.3624	30.5231	30.2405
	1.41449	-0.236954	P60335	P60335	Poly(rC)-binding protein 1	Pcbp1	9	9	7	53.4	53.4	44.7	37.497	0	172.68	781300000	163	9	9	9	9	9	8	9	9	8	9	9	9	7	7	7	7	7	6	7	7	7	7	7	7	25.994	26.1187	26.2393	26.3403	26.4167	26.3059	26.2327	26.4932
	0.027638	0.0143204	P60469;P60469-2;A0A1B0GRM4;B2RXW8;B2RXQ2;S4R1I7	P60469;P60469-2	Liprin-alpha-3	Ppfia3	13	13	12	14.7	14.7	13.7	133.42	0	40.632	206980000	37	12	9	9	9	10	8	10	9	8	11	10	9	11	8	8	8	9	7	9	8	7	10	9	8	24.1271	24.6349	24.1472	24.1932	24.3017	24.3714	24.097	24.4005
	1.50711	0.254763	P60487;A0A2R8W6I7	P60487	Pyridoxal phosphate phosphatase	Pdxp	8	8	8	40.8	40.8	40.8	31.512	0	52.706	398250000	100	6	8	4	7	6	6	5	7	7	7	5	8	6	8	4	7	6	6	5	7	7	7	5	8	25.4366	25.2096	25.2897	25.0964	24.9749	25.1002	25.5591	25.1184
	1.07735	0.107917	P60710;E9Q1F2;E9Q5F4;G3UZ07;E9Q606;Q8BFZ3;F8WGM8;E9Q2D1;F6WX90;V9GXQ2	P60710;E9Q1F2;E9Q5F4	Actin, cytoplasmic 1;Actin, cytoplasmic 1, N-terminally processed	Actb	25	25	1	87.5	87.5	4.5	41.736	0	323.31	62634000000	4628	24	25	25	25	23	23	23	23	23	24	23	23	1	1	1	1	1	1	1	1	1	1	1	1	32.2978	32.2086	32.2535	32.1421	32.2153	32.0788	32.2907	32.2144
	0.216059	-0.0390638	P60766	P60766	Cell division control protein 42 homolog	Cdc42	6	2	2	47.1	14.1	14.1	21.258	0	15.943	64220000	46	2	2	2	2	2	2	2	2	2	2	2	2	2	2	2	2	2	2	2	2	2	2	2	2	22.2939	22.36	22.4441	22.3437	22.3561	22.5154	22.666	22.3595
	0.142831	0.0592613	P60766-1	P60766-1	Cell division control protein 42 homolog	Cdc42	6	6	2	48.2	48.2	15.2	21.31	0	38.933	274970000	126	6	6	6	5	5	5	5	5	5	6	5	6	2	2	2	2	2	2	2	2	2	2	2	2	24.6351	24.2182	24.6079	24.5762	24.3439	24.3633	24.4093	24.3877
	0.514659	0.173965	P60840-2;P60840;P60840-3	P60840-2;P60840	Alpha-endosulfine	Ensa	3	2	2	37.6	28.2	28.2	12.921	0	8.84	115780000	36	2	2	2	1	2	1	2	2	1	2	1	2	2	2	2	1	2	1	2	2	1	2	1	2	23.5703	23.2196	23.5669	23.3097	23.4194	23.1058	23.5457	23.0717
	0.225767	0.116896	P60843	P60843	Eukaryotic initiation factor 4A-I	Eif4a1	10	4	4	25.1	8.4	8.4	46.153	0	10.381	47275000	18	2	2	1	1	3	1	3	2	3	3	2	2	2	2	1	1	3	1	3	2	3	3	2	2	22.3195	22.1487	22.3055	21.7605	22.4047	22.2578	22.0921	22.019
	0.331675	0.168133	P60867	P60867	40S ribosomal protein S20	Rps20	2	2	2	19.3	19.3	19.3	13.373	0	12.933	118910000	40	2	2	2	2	2	2	2	2	2	2	2	2	2	2	2	2	2	2	2	2	2	2	2	2	23.7774	23.8313	23.8517	23.2368	23.8704	23.8487	22.857	23.5298
	0.716846	-0.160514	P60904;G5E8T0;A2AUE1	P60904;G5E8T0;A2AUE1	DnaJ homolog subfamily C member 5	Dnajc5	5	5	5	38.4	38.4	38.4	22.101	0	66.922	400620000	67	3	5	5	4	5	4	4	4	5	5	5	5	3	5	5	4	5	4	4	4	5	5	5	5	25.2039	25.1428	25.2895	25.5499	25.3333	25.2347	25.4892	25.3233
	0.0877388	0.025411	P61027;D3YUS4	P61027	Ras-related protein Rab-10	Rab10	7	7	5	41.5	41.5	32.5	22.541	0	49.977	669660000	154	6	6	6	7	7	7	6	6	6	6	6	7	4	4	4	5	5	5	4	4	4	4	4	5	25.8129	26.0617	26.0966	25.8629	26.0137	26.0182	25.7662	26.0873
	0.320402	0.0497691	P61089;A0A1W2P7Z3;A0A087WPV1;Q9CQ37	P61089	Ubiquitin-conjugating enzyme E2 N	Ube2n	8	8	8	66.4	66.4	66.4	17.138	0	78.334	919680000	185	7	8	8	8	7	8	7	8	7	7	7	8	7	8	8	8	7	8	7	8	7	7	7	8	26.4187	26.5619	26.4226	26.4637	26.4579	26.3323	26.5905	26.5752
	0.00677386	-0.00281461	P61161	P61161	Actin-related protein 2	Actr2	11	11	11	37.6	37.6	37.6	44.76	0	111.33	998410000	249	10	9	9	10	11	9	9	9	10	11	9	9	10	9	9	10	11	9	9	9	10	11	9	9	26.5895	26.5549	26.8697	26.4921	26.7987	26.7318	26.4596	26.6737
	0.487374	-0.264943	P61164	P61164	Alpha-centractin	Actr1a	10	4	4	44.4	22.6	22.6	42.613	0	22.253	292220000	53	4	4	4	4	3	2	4	4	4	4	4	3	4	4	4	4	3	2	4	4	4	4	4	3	24.7716	25.04	24.5062	25.1641	25.2653	24.6831	24.6445	24.7633
	0.480654	-0.079483	P61202;P61202-2;A2AQE4	P61202;P61202-2;A2AQE4	COP9 signalosome complex subunit 2	Cops2	8	8	8	25.7	25.7	25.7	51.596	0	65.935	164080000	50	7	6	7	8	8	6	5	7	8	8	7	7	7	6	7	8	8	6	5	7	8	8	7	7	24.0372	23.9364	23.9211	23.9205	24.1042	24.1084	23.9504	24.1842
	0.391857	0.0823898	P61205;P84078;Q8BSL7;D3YV25;E9Q2C2;A2A6T9	P61205;P84078;Q8BSL7	ADP-ribosylation factor 3;ADP-ribosylation factor 1;ADP-ribosylation factor 2	Arf3;Arf1;Arf2	12	12	6	76.8	76.8	44.8	20.601	0	109.29	2564800000	409	10	11	11	9	8	10	9	9	9	9	9	9	5	6	6	5	4	5	5	5	4	4	4	4	27.6739	27.7182	27.9539	27.7351	27.6865	27.6773	27.6765	27.8982
	0.676944	-0.198889	P61222	P61222	ATP-binding cassette sub-family E member 1	Abce1	4	4	4	12.5	12.5	12.5	67.314	0	16.741	60400000	11	4	4	4	3	3	2	4	4	2	2	3	3	4	4	4	3	3	2	4	4	2	2	3	3	22.3047	22.4579	22.7423	22.66	22.7746	22.667	22.523	22.7502
	0.358283	0.115132	P61226	P61226	Ras-related protein Rap-2b	Rap2b	7	7	2	46.4	46.4	15.3	20.504	0	64.49	236220000	57	4	7	6	6	5	5	7	5	6	6	7	5	2	2	2	2	2	2	2	2	2	2	2	2	24.648	24.6073	24.4822	24.6419	24.5252	24.2249	24.4043	24.769
	1.33098	0.222743	P61264;A0A0U1RNT8	P61264	Syntaxin-1B	Stx1b	14	14	13	54.9	54.9	52.4	33.244	0	323.31	2787500000	618	13	12	12	11	13	12	12	11	13	13	12	13	12	11	11	10	12	11	11	10	12	12	11	12	28.2283	28.1895	28.1626	28.0036	28.0827	27.8258	28.1034	28.0509
	0.771027	0.103783	P61294;A0A1L1SRS6	P61294;A0A1L1SRS6	Ras-related protein Rab-6B	Rab6b	6	6	1	32.2	32.2	6.7	23.461	0	52.666	1638500000	134	5	5	4	4	4	4	6	5	4	6	5	5	1	1	1	1	1	1	1	1	1	1	1	1	27.3377	27.198	27.3652	27.2189	27.1295	27.2411	27.2314	27.2679
	0.0806727	-0.0540581	P61329-2;P61329;A0A0R4J063;O89096;P70379-2;P70379	P61329-2;P61329	Fibroblast growth factor 12	Fgf12	3	3	3	35.4	35.4	35.4	20.424	0	4.8781	26892000	8	2	2	2	1	1	1	1	2	2	2	2	1	2	2	2	1	1	1	1	2	2	2	2	1	21.1188	21.6391	20.94	21.5058	21.1725	21.1819	21.1569	21.1615
	0.0246888	-0.0148137	P61358;A2A4Q0	P61358	60S ribosomal protein L27	Rpl27	4	4	4	36	36	36	15.798	0	25.345	199850000	101	4	4	4	4	4	4	4	4	4	4	4	4	4	4	4	4	4	4	4	4	4	4	4	4	24.3143	24.0863	24.517	24.0056	24.49	24.4664	24.2191	24.2945
	0.486151	0.260395	P61750;E9Q798;F6UFB9	P61750;E9Q798	ADP-ribosylation factor 4	Arf4	8	2	2	52.2	12.2	12.2	20.396	0	13.269	50172000	8	2	2	2	2	2	2	2	2	2	2	2	2	2	2	2	2	2	2	2	2	2	2	2	2	22.2703	22.6124	21.8156	21.965	22.032	21.9201	22.6224	22.3934
	0.0364791	-0.0297419	P61759;Q3TIR6	P61759;Q3TIR6	Prefoldin subunit 3	Vbp1	5	5	5	32.1	32.1	32.1	22.435	0	17.469	91381000	9	2	3	3	4	4	2	2	3	3	5	2	3	2	3	3	4	4	2	2	3	3	5	2	3	23.3849	22.5548	23.2557	23.0631	23.2799	22.9416	22.926	23.1286
	1.54961	-0.211157	P61922;P61922-2;Q3TUE8;F7C9G3;F6RN86	P61922;P61922-2	4-aminobutyrate aminotransferase, mitochondrial	Abat	25	25	25	72	72	72	56.451	0	323.31	3714600000	584	22	23	19	21	22	21	23	22	23	24	23	23	22	23	19	21	22	21	23	22	23	24	23	23	28.1678	28.2682	28.3541	28.494	28.518	28.4114	28.4914	28.4925
	0.518218	-0.248205	P61967;D3Z268;B1B0F6;D3Z0D6;Q3TIV9;Q8BW87;D3YXN0;Q9DB50	P61967;D3Z268;B1B0F6;D3Z0D6;Q3TIV9;Q8BW87;D3YXN0;Q9DB50	AP-1 complex subunit sigma-1A;AP-1 complex subunit sigma-2	Ap1s1;Ap1s2	2	2	2	15.2	15.2	15.2	18.733	0	10.409	17758000	3	1	2	2	1	2	2	2	2	1	1	1	2	1	2	2	1	2	2	2	2	1	1	1	2	20.5385	20.9632	20.6076	21.2501	20.9193	20.6847	20.5919	20.8314
	0.75074	-0.105647	P61971;A0A1D5RLR1	P61971	Nuclear transport factor 2	Nutf2	6	6	6	76.4	76.4	76.4	14.478	0	47.303	263900000	104	6	4	6	6	5	6	5	6	6	5	6	5	6	4	6	6	5	6	5	6	6	5	6	5	24.6261	24.6554	24.7272	24.7818	24.8709	24.673	24.821	24.748
	0.13275	-0.0301056	P61979;P61979-2;H3BLL4;A0A286YDM3;H3BK96;A0A286YCM2;A0A286YEC4;A0A286YDH1	P61979;P61979-2;H3BLL4;A0A286YDM3;H3BK96	Heterogeneous nuclear ribonucleoprotein K	Hnrnpk	17	17	1	49.2	49.2	7.8	50.976	0	282.21	1727800000	250	16	16	16	16	17	16	16	16	17	14	15	17	1	1	1	1	1	1	1	1	1	1	1	1	27.4672	27.3972	27.2639	27.5228	27.3412	27.3546	27.4854	27.3839
	1.3522	0.164136	P61982	P61982	14-3-3 protein gamma;14-3-3 protein gamma, N-terminally processed	Ywhag	13	11	10	63.6	60.3	56.7	28.302	0	323.31	4172500000	422	10	10	10	10	10	10	10	9	10	11	9	9	9	9	9	9	9	9	9	8	9	10	8	8	28.8816	28.724	28.8229	28.6922	28.6627	28.5811	28.7392	28.5267
	0.208836	0.152581	P62075;A0A1W2P756;A0A1W2P7H2	P62075;A0A1W2P756;A0A1W2P7H2	Mitochondrial import inner membrane translocase subunit Tim13	Timm13	4	4	4	53.7	53.7	53.7	10.458	0	17.758	115370000	52	4	3	3	3	3	3	3	4	3	3	4	3	4	3	3	3	3	3	3	4	3	3	4	3	23.8684	23.807	23.1404	23.736	23.1812	23.4409	23.2781	22.9698
	0.185424	0.102428	P62137;A0A0J9YUG2	P62137	Serine/threonine-protein phosphatase PP1-alpha catalytic subunit	Ppp1ca	12	3	3	53.6	18.2	18.2	37.54	0	10.325	145850000	16	2	3	3	3	3	3	3	3	3	3	3	3	2	3	3	3	3	3	3	3	3	3	3	3	24.17	24.0742	23.5886	24.0614	23.739	23.7253	23.8234	23.9109
	0.193563	-0.0253296	P62141;A0A0J9YUU8	P62141	Serine/threonine-protein phosphatase PP1-beta catalytic subunit	Ppp1cb	13	13	4	52	52	22.3	37.186	0	195.39	1157300000	193	12	13	12	11	10	10	12	11	13	11	11	12	3	4	3	3	2	1	4	2	4	2	3	3	26.7675	26.7698	26.8548	26.9048	26.7771	26.7862	26.9324	26.8488
	0.394781	-0.152815	P62192	P62192	26S protease regulatory subunit 4	Psmc1	7	7	7	28	28	28	49.184	0	28.365	150460000	32	7	6	5	6	5	3	4	6	5	5	5	5	7	6	5	6	5	3	4	6	5	5	5	5	23.9704	23.6187	23.8958	23.7416	24.1544	24.0474	24.1058	23.6902
	0.27203	0.133576	P62196;Q8K1K2	P62196;Q8K1K2	26S protease regulatory subunit 8	Psmc5	10	10	10	39.4	39.4	39.4	45.626	0	44.685	162690000	39	8	9	9	9	8	7	7	7	8	6	7	8	8	9	9	9	8	7	7	7	8	6	7	8	24.0562	23.9849	23.7674	23.9117	23.4571	24.0389	24.0687	24.1194
	1.07818	-0.132374	P62242	P62242	40S ribosomal protein S8	Rps8	6	6	6	34.1	34.1	34.1	24.205	0	55.719	211860000	59	5	5	5	5	4	6	5	6	5	5	3	4	5	5	5	5	4	6	5	6	5	5	3	4	24.3223	24.2968	24.3154	24.5114	24.3301	24.4902	24.2881	24.5275
	2.23446	0.222116	P62259;F6WA09;D6REF3;O70456	P62259	14-3-3 protein epsilon	Ywhae	20	20	18	73.7	73.7	70.6	29.174	0	323.31	8640600000	962	20	19	19	20	18	18	20	19	19	20	18	18	18	17	17	18	16	16	18	17	17	18	16	16	29.7641	29.6557	29.6843	29.5281	29.4688	29.4408	29.6295	29.7133
	0.0365044	-0.0068512	P62264;D3YVF4;D3Z7I1	P62264;D3YVF4;D3Z7I1	40S ribosomal protein S14	Rps14	3	3	3	29.1	29.1	29.1	16.273	0	17.359	115210000	41	3	3	3	3	1	3	3	3	3	3	2	3	3	3	3	3	1	3	3	3	3	3	2	3	23.3479	23.5492	23.4689	23.468	23.4165	23.502	23.0941	23.7346
	0.558626	0.153557	P62267	P62267	40S ribosomal protein S23	Rps23	1	1	1	7.7	7.7	7.7	15.807	0	4.489	21991000	7	1	1	1	1	1	1	1	1	1	1	1	1	1	1	1	1	1	1	1	1	1	1	1	1	21.161	21.3369	21.0808	21.1341	21.1358	20.8481	21.0771	21.2755
	0.7872	0.182845	P62281;A0A1B0GRR3;A0A1B0GSE8	P62281;A0A1B0GRR3;A0A1B0GSE8	40S ribosomal protein S11	Rps11	6	6	6	40.5	40.5	40.5	18.431	0	11.89	67639000	16	4	4	4	3	5	5	5	4	5	5	5	4	4	4	4	3	5	5	5	4	5	5	5	4	22.7416	22.5464	22.805	22.6559	22.481	22.4074	22.9711	23.1771
	0.0045615	-0.00203832	Q921R2;P62301;A0A0U1RQ71	Q921R2;P62301	40S ribosomal protein S13	Rps13	5	5	5	32.1	32.1	32.1	16.142	0	25.379	336600000	51	5	5	5	5	5	5	5	5	5	5	5	4	5	5	5	5	5	5	5	5	5	5	5	4	24.9344	24.9385	25.3549	25.1087	24.991	25.1342	24.8279	25.1989
	0.86482	0.270869	P62315	P62315	Small nuclear ribonucleoprotein Sm D1	Snrpd1	2	2	2	27.7	27.7	27.7	13.281	0	13.257	69585000	33	2	2	2	1	2	1	1	1	2	2	2	1	2	2	2	1	2	1	1	1	2	2	2	1	22.6845	22.5786	23.028	22.597	22.4598	22.4217	23.0122	22.9914
	1.1403	-0.598359	P62317	P62317	Small nuclear ribonucleoprotein Sm D2	Snrpd2	4	4	4	39	39	39	13.527	0	7.7201	80586000	13	3	3	3	3	3	3	3	2	3	3	3	3	3	3	3	3	3	3	3	2	3	3	3	3	22.263	22.3914	22.8773	23.1949	22.7973	23.3346	23.2282	22.8802
	0.27485	-0.186462	P62320	P62320	Small nuclear ribonucleoprotein Sm D3	Snrpd3	2	2	2	15.1	15.1	15.1	13.916	0	6.2327	62856000	13	2	2	2	2	2	2	2	2	2	2	2	2	2	2	2	2	2	2	2	2	2	2	2	2	21.9874	22.7036	22.8482	22.5978	22.7966	22.7042	22.7737	22.7804
	2.1277	-0.4704	P62334	P62334	26S protease regulatory subunit 10B	Psmc6	9	9	9	33.9	33.9	33.9	44.172	0	41.387	200530000	48	7	7	7	6	8	5	6	9	6	8	9	6	7	7	7	6	8	5	6	9	6	8	9	6	24.0609	24.2094	23.987	24.5465	24.6776	24.4445	24.3478	24.5944
	0.259121	-0.0630194	P62482;Q3UPV6;E0CXZ9;E0CXI4;E0CYS2	P62482;Q3UPV6;E0CXZ9	Voltage-gated potassium channel subunit beta-2	Kcnab2	10	10	10	46.9	46.9	46.9	41.021	0	113.83	422720000	118	10	9	6	9	7	6	7	8	9	9	8	7	10	9	6	9	7	6	7	8	9	9	8	7	25.324	25.2794	25.4256	25.3738	25.5696	25.2747	25.2774	25.3441
	1.39851	-0.310906	P62627;A2AVR9	P62627;A2AVR9	Dynein light chain roadblock-type 1	Dynlrb1	5	5	5	83.3	83.3	83.3	10.99	0	30.033	321440000	86	4	5	4	4	4	3	4	5	4	5	5	4	4	5	4	4	4	3	4	5	4	5	5	4	24.4749	24.656	24.7651	24.8564	25.0578	24.9144	24.902	25.0321
	0.367601	-0.0758953	P62631	P62631	Elongation factor 1-alpha 2	Eef1a2	16	8	8	59.4	37.4	37.4	50.454	0	257.61	3857100000	284	7	7	7	7	8	8	7	7	8	7	7	8	7	7	7	7	8	8	7	7	8	7	7	8	28.4841	28.344	28.4218	28.6436	28.4344	28.3996	28.6245	28.278
	0.0696361	-0.0160173	P62702;V9GWY0	P62702	40S ribosomal protein S4, X isoform	Rps4x	5	5	5	18.3	18.3	18.3	29.597	0	25.193	118600000	70	5	4	5	5	5	4	4	5	4	5	5	4	5	4	5	5	5	4	4	5	4	5	5	4	23.5536	23.5432	23.5677	23.43	23.7074	23.5752	23.4758	23.5943
	0.215806	0.0331008	P62743;A0A0U1RPS0;A0A0U1RQ06	P62743;A0A0U1RPS0	AP-2 complex subunit sigma	Ap2s1	6	6	6	33.8	33.8	33.8	17.018	0	18.896	307800000	88	6	5	5	5	6	4	6	6	5	6	5	6	6	5	5	5	6	4	6	6	5	6	5	6	24.9183	25.0966	25.0296	24.9237	25.0166	25.0048	24.966	25.0319
	0.513386	-0.137537	P62746	P62746	Rho-related GTP-binding protein RhoB	Rhob	7	5	5	46.4	33.2	33.2	22.123	0	25.501	271250000	134	4	5	4	4	4	4	4	4	4	5	5	4	4	5	4	4	4	4	4	4	4	5	5	4	24.7566	24.5394	24.7593	24.6499	24.9646	24.8533	24.7291	24.6492
	1.14778	-0.43074	P62748;A0A1Y7VMK3	P62748;A0A1Y7VMK3	Hippocalcin-like protein 1	Hpcal1	9	5	5	53.4	30.6	30.6	22.338	0	32.079	89648000	47	4	4	5	4	4	4	4	4	4	4	5	4	4	4	5	4	4	4	4	4	4	4	5	4	22.8034	22.9513	23.1088	23.0943	23.6121	23.4493	22.9477	23.2185
	0.436708	0.478033	P62754	P62754	40S ribosomal protein S6	Rps6	4	4	4	18.9	18.9	18.9	28.68	0	14.484	97057000	19	3	3	2	3	3	3	3	2	3	4	3	3	3	3	2	3	3	3	3	2	3	4	3	3	23.7092	23.5637	23.4752	23.7756	22.2136	23.3247	22.9538	23.193
	0.347454	0.0953344	P62761	P62761	Visinin-like protein 1	Vsnl1	13	13	12	68.1	68.1	63.4	22.142	0	159.21	1533700000	462	11	12	12	13	13	12	9	11	11	12	12	12	10	12	11	12	12	12	9	11	11	12	12	12	27.1349	27.1232	27.3079	27.0375	27.2819	26.9606	26.9999	27.0504
	0.203822	0.137552	P62774;A0A0J9YV46	P62774	Myotrophin	Mtpn	6	6	6	75.4	75.4	75.4	12.861	0	110.95	860370000	154	5	5	6	5	5	6	5	6	5	6	6	5	5	5	6	5	5	6	5	6	5	6	6	5	26.3446	26.7414	25.9466	26.4218	25.9945	26.2036	26.5393	26.6479
	0.521922	0.0524146	P62806	P62806	Histone H4	Hist1h4a	7	7	7	52.4	52.4	52.4	11.367	0	69.824	2551900000	340	7	7	6	7	7	7	6	7	7	7	7	7	7	7	6	7	7	7	6	7	7	7	7	7	28.0798	28.193	28.2056	28.1427	28.0795	28.099	27.791	27.7256
	0.126894	0.123554	P62812;A0A0U1RPE4	P62812;A0A0U1RPE4	Gamma-aminobutyric acid receptor subunit alpha-1	Gabra1	2	2	2	8.1	8.1	8.1	51.753	0	10.753	37457000	8	2	2	2	2	2	2	2	2	2	1	1	2	2	2	2	2	2	2	2	2	2	1	1	2	21.5593	22.0712	22.19	22.0565	21.2206	22.1727	21.8594	21.7712
	0.554161	-0.0431201	P62814;Q91YH6;A0A0U1RNU9	P62814	V-type proton ATPase subunit B, brain isoform	Atp6v1b2	23	23	23	57.7	57.7	57.7	56.55	0	323.31	6160500000	890	20	20	20	20	20	19	19	18	19	19	19	18	20	20	20	20	20	19	19	18	19	19	19	18	29.2527	29.2207	29.2006	29.2333	29.2405	29.3295	29.2128	29.2413
	0.224736	-0.0312881	P62827;Q14AA6;Q61820	P62827;Q14AA6	GTP-binding nuclear protein Ran	Ran;1700009N14Rik	8	8	8	41.2	41.2	41.2	24.423	0	58.09	1106500000	126	8	6	8	8	8	8	8	7	8	8	8	8	8	6	8	8	8	8	8	7	8	8	8	8	26.7103	26.7348	26.7928	26.7502	26.7099	26.8716	26.4374	26.4349
	0.0949279	0.0296822	P62830;A2A6F8	P62830;A2A6F8	60S ribosomal protein L23	Rpl23	3	3	3	30.7	30.7	30.7	14.865	0	41.062	135440000	51	3	2	2	3	3	2	3	3	3	2	2	2	3	2	2	3	3	2	3	3	3	2	2	2	23.6359	23.7969	23.7597	23.6176	23.5844	23.9014	23.7127	24.0207
	0.564531	-0.229259	P62838;A0A0G2JE32;A0A0G2JGL0;P61079;Q6ZWY6	P62838;A0A0G2JE32;A0A0G2JGL0;P61079	Ubiquitin-conjugating enzyme E2 D2;Ubiquitin-conjugating enzyme E2 D3	Ube2d2;Ube2d3	3	3	3	28.6	28.6	28.6	16.735	0	14.429	187450000	28	2	2	2	2	3	3	2	2	2	2	2	2	2	2	2	2	3	3	2	2	2	2	2	2	23.949	23.8154	24.1743	24.0178	24.1111	24.4975	23.9658	24.0638
	0.790574	0.285302	P62843;D3YTQ9	P62843;D3YTQ9	40S ribosomal protein S15	Rps15	2	2	2	33.8	33.8	33.8	17.04	0	21.987	84310000	33	2	2	1	2	2	2	2	2	2	2	2	2	2	2	1	2	2	2	2	2	2	2	2	2	22.8389	22.739	23.2716	22.6015	22.6834	22.7088	22.9452	22.9158
	0.418944	-0.153351	Q642K5;P62862	Q642K5;P62862	40S ribosomal protein S30	Fau	1	1	1	7.5	7.5	7.5	14.416	0	4.0615	47547000	18	1	1	1	1	1	1	1	1	1	1	1	1	1	1	1	1	1	1	1	1	1	1	1	1	22.0099	22.0819	22.2997	22.1654	22.1439	22.5423	22.1788	21.967
	1.07994	0.0981318	P62869	P62869	Transcription elongation factor B polypeptide 2	Tceb2	6	6	6	59.3	59.3	59.3	13.17	0	20.916	192290000	68	5	5	4	5	6	6	6	4	6	6	4	4	5	5	4	5	6	6	6	4	6	6	4	4	24.3822	24.2648	24.3648	24.245	24.2741	24.1983	24.2039	24.1173
	0.317741	0.0527007	P62874;H3BKR2;H3BLF7	P62874;H3BKR2;H3BLF7	Guanine nucleotide-binding protein G(I)/G(S)/G(T) subunit beta-1	Gnb1	13	13	8	55	55	29.7	37.377	0	323.31	3942100000	1039	13	13	13	13	12	13	13	13	13	13	13	12	8	8	8	8	8	8	8	8	8	8	8	8	28.5373	28.5823	28.3621	28.4245	28.4598	28.4394	28.5367	28.3428
	0.15806	0.0331612	P62880;E9QKR0;D3Z1M1;D3Z1T4;D3YZX3;E9PWM7	P62880;E9QKR0;D3Z1M1;D3Z1T4;D3YZX3	Guanine nucleotide-binding protein G(I)/G(S)/G(T) subunit beta-2	Gnb2	12	8	5	45.9	29.7	21.8	37.331	0	323.31	1642200000	353	8	8	8	8	8	8	8	7	8	8	8	8	5	5	5	5	5	5	5	5	5	5	5	5	27.4759	27.3218	27.2822	27.4064	27.3448	27.2293	27.4534	27.3128
	0.576818	-0.147364	P62881-2;P62881;A0A1L1STC5	P62881-2;P62881	Guanine nucleotide-binding protein subunit beta-5	Gnb5	9	9	9	34.3	34.3	34.3	38.731	0	48.409	260840000	34	8	6	8	7	6	8	8	8	8	7	7	7	8	6	8	7	6	8	8	8	8	7	7	7	24.5139	24.6964	24.7781	24.646	24.874	24.9105	24.4901	24.5295
	0.205023	-0.0812702	P62908;A0A140LI77;D3YV43	P62908;A0A140LI77;D3YV43	40S ribosomal protein S3	Rps3	11	11	11	51.9	51.9	51.9	26.674	0	38.042	409310000	133	8	9	9	9	9	9	11	9	8	10	10	8	8	9	9	9	9	9	11	9	8	10	10	8	25.4041	25.0918	25.4304	25.1744	25.5	25.4957	25.1632	25.3267
	0.582819	0.0689201	P62983	P62983	Ubiquitin-40S ribosomal protein S27a;Ubiquitin;40S ribosomal protein S27a	Rps27a	6	6	1	42.3	42.3	12.2	17.951	0	108.84	2600000000	340	6	6	5	5	5	6	6	6	5	6	6	6	1	1	1	1	1	1	1	1	1	1	1	1	27.7142	27.6594	27.669	27.669	27.6544	27.5124	27.7322	27.4589
	0.819895	-0.159193	Q3TLP8;P63001;A0A2R8VHH0;Q05144	Q3TLP8;P63001	Ras-related C3 botulinum toxin substrate 1	Rac1	7	7	4	32.2	32.2	19.4	23.432	0	41.641	890260000	230	6	6	6	7	7	7	6	6	7	6	6	7	4	4	3	4	4	4	4	4	4	4	4	4	26.3034	26.4905	26.4614	26.7046	26.4691	26.5591	26.7383	26.5951
	0.134553	-0.0554212	P63005;P63005-2;Q5SW16	P63005;P63005-2	Platelet-activating factor acetylhydrolase IB subunit alpha	Pafah1b1	9	9	9	29.5	29.5	29.5	46.67	0	31.501	238250000	51	9	7	8	8	8	5	8	9	8	8	7	8	9	7	8	8	8	5	8	9	8	8	7	8	24.5229	24.3494	24.7973	24.5923	24.7554	24.4882	24.5598	24.5155
	0.694047	0.0749067	P63011;D3YZP5	P63011	Ras-related protein Rab-3A	Rab3a	7	7	5	42.7	42.7	30.5	24.97	0	205.64	3182400000	540	7	7	7	7	7	7	7	7	7	7	7	7	5	5	5	5	5	5	5	5	5	5	5	5	28.1997	28.3406	28.2257	28.2222	28.1775	28.1416	28.2326	28.1128
	0.0975763	0.0188764	P63017;Q504P4;D3Z5E2	P63017;Q504P4	Heat shock cognate 71 kDa protein	Hspa8	29	29	21	55.7	55.7	41.3	70.87	0	323.31	13766000000	1837	29	29	29	29	29	28	28	29	27	29	29	28	21	21	21	21	21	20	20	21	19	21	21	20	30.316	30.3984	30.3276	30.316	30.2238	30.4456	30.2296	30.2315
	0.0262652	0.0163441	P63028;D3YU75	P63028;D3YU75	Translationally-controlled tumor protein	Tpt1	2	2	2	15.7	15.7	15.7	19.462	0	41.81	433940000	68	2	2	2	2	2	2	2	2	2	2	2	2	2	2	2	2	2	2	2	2	2	2	2	2	25.1412	25.5648	25.326	25.4455	25.5427	24.9948	25.6884	25.5555
	1.0798	0.222493	P63037;B1AXY1;B1AXX9;B1AXY0	P63037;B1AXY1;B1AXX9;B1AXY0	DnaJ homolog subfamily A member 1	Dnaja1	5	5	5	24.2	24.2	24.2	44.868	0	28.608	140830000	38	5	5	4	4	4	4	5	4	5	5	5	5	5	5	4	4	4	4	5	4	5	5	5	5	23.8342	23.904	23.6337	23.5999	23.64	23.4645	23.7332	23.7192
	0.393239	0.040816	P63038;P63038-2;D3Z2F2;D3Z7J9	P63038	60 kDa heat shock protein, mitochondrial	Hspd1	28	28	28	62.5	62.5	62.5	60.955	0	323.31	3222100000	1074	27	26	25	25	25	23	26	26	26	27	26	25	27	26	25	25	25	23	26	26	26	27	26	25	28.1658	28.1623	28.1635	28.0429	28.1324	28.1938	28.1039	28.13
	0.0171868	0.01109	P63040	P63040	Complexin-1	Cplx1	4	3	3	41	32.8	32.8	15.122	0	13.32	138890000	28	1	2	2	2	3	2	2	2	3	1	3	3	1	2	2	2	3	2	2	2	3	1	3	3	22.9098	22.9514	22.9416	22.8753	23.3152	22.579	23.1155	22.9894
	0.45981	-0.0787214	P63046-2;P63046	P63046-2;P63046	Sulfotransferase 4A1	Sult4a1	7	7	7	36.8	36.8	36.8	32.323	0	22.794	148810000	46	6	6	6	5	6	4	3	6	6	6	6	6	6	6	6	5	6	4	3	6	6	6	6	6	23.7769	23.9559	23.8727	23.9357	23.862	24.0438	23.8881	23.8084
	1.14256	0.11414	P63085	P63085	Mitogen-activated protein kinase 1	Mapk1	23	23	19	76.8	76.8	64.2	41.275	0	285.05	1690600000	332	19	19	18	19	19	19	16	18	17	22	18	20	16	17	16	16	17	17	14	16	15	18	15	17	27.4956	27.4827	27.4503	27.3511	27.2902	27.4449	27.4558	27.2864
	0.277184	0.0780017	P63087;P63087-2;A0A0G2JGC1;A0A0G2JFF1	P63087;P63087-2;A0A0G2JGC1;A0A0G2JFF1	Serine/threonine-protein phosphatase PP1-gamma catalytic subunit	Ppp1cc	13	4	3	54.5	24.5	17.6	36.983	0	35.811	176690000	45	4	4	3	2	3	3	3	3	3	3	3	3	3	3	3	2	3	3	3	3	3	3	3	3	24.0861	24.3205	24.0102	24.079	23.9425	24.1612	24.263	24.1462
	0.238109	0.0948188	Z4YKV1;P63094-2;P63094;Q6R0H7-4;Q6R0H7;P63094-3	Z4YKV1;P63094-2;P63094;Q6R0H7-4;Q6R0H7;P63094-3	Guanine nucleotide-binding protein G(s) subunit alpha isoforms short;Guanine nucleotide-binding protein G(s) subunit alpha isoforms XLas	Gnas	10	9	8	34.6	31.7	27.2	44.178	0	44.057	241000000	81	8	7	7	8	6	7	8	6	7	7	8	8	7	6	6	7	5	6	7	5	6	6	7	7	24.5657	24.3794	24.824	24.319	24.5562	24.6094	24.5356	24.6328
	0.491123	0.10865	P63101;A0A2I3BQ03;D3YXN6;D3YXF4;D3YW45	P63101;A0A2I3BQ03	14-3-3 protein zeta/delta	Ywhaz	14	12	12	59.6	56.3	56.3	27.771	0	323.31	11194000000	1857	12	12	11	11	12	11	12	12	12	12	11	12	12	12	11	11	12	11	12	12	12	12	11	12	30.1293	30.1558	29.9354	30.0982	29.891	29.9053	30.1919	29.9477
	0.198688	-0.0767708	P63168	P63168	Dynein light chain 1, cytoplasmic	Dynll1	5	1	1	70.8	24.7	24.7	10.366	0	116.27	248980000	62	1	1	1	1	1	1	1	1	1	1	1	1	1	1	1	1	1	1	1	1	1	1	1	1	24.5428	24.449	24.6804	24.71	24.8164	24.3761	24.9497	24.6642
	0.252551	-0.112018	P63213	P63213	Guanine nucleotide-binding protein G(I)/G(S)/G(O) subunit gamma-2	Gng2	4	4	4	59.2	59.2	59.2	7.8501	0	46.87	733300000	49	4	2	3	4	4	2	3	4	4	4	2	2	4	2	3	4	4	2	3	4	4	4	2	2	25.8397	26.4221	26.0996	26.1807	26.3345	26.1823	26.2938	26.2227
	0.65794	-0.210432	P63216	P63216	Guanine nucleotide-binding protein G(I)/G(S)/G(O) subunit gamma-3	Gng3	2	2	2	60	60	60	8.3047	0	30.184	205090000	47	2	2	2	2	2	2	2	2	2	2	2	2	2	2	2	2	2	2	2	2	2	2	2	2	24.1777	23.7463	23.8801	24.2641	24.0263	24.1451	24.4909	24.4454
	0.223365	-0.0732555	P63276	P63276	40S ribosomal protein S17	Rps17	3	3	3	32.6	32.6	32.6	15.524	0	72.502	122570000	49	3	3	3	3	3	3	3	3	3	3	3	3	3	3	3	3	3	3	3	3	3	3	3	3	23.6715	23.4659	23.4174	23.3899	23.6695	23.7151	23.4762	23.4833
	0.19864	-0.0899347	P63280;Q8CFZ0;G3UYP0;G3UZL6	P63280;Q8CFZ0;G3UYP0	SUMO-conjugating enzyme UBC9	Ube2i	4	4	4	47.5	47.5	47.5	18.007	0	39.606	104930000	23	3	3	3	4	3	2	2	4	4	3	3	3	3	3	3	4	3	2	2	4	4	3	3	3	23.4922	23.1673	23.1813	23.5362	23.0957	23.4786	23.6672	22.9872
	0.226583	0.0471897	P63318;Q2NKI4;A0A0N4SWF4	P63318;Q2NKI4	Protein kinase C gamma type;Protein kinase C	Prkcg	29	29	27	58.8	58.8	53.5	78.357	0	254	2071800000	584	27	25	27	29	27	26	27	26	27	23	25	24	25	23	25	27	25	24	25	24	25	21	23	22	27.7486	27.8706	27.6477	27.7972	27.7034	27.6247	27.7889	27.7272
	0.500321	0.122517	P63321;A0A1Y7VL93;Q9JIW9	P63321;A0A1Y7VL93;Q9JIW9	Ras-related protein Ral-A;Ras-related protein Ral-B	Rala;Ralb	4	4	4	22.8	22.8	22.8	23.553	0	15.948	249270000	78	4	3	4	3	3	3	4	3	3	4	4	3	4	3	4	3	3	3	4	3	3	4	4	3	24.8797	24.6155	24.6551	24.6164	24.7	24.4662	24.5344	24.5408
	0.0693462	-0.0449422	Q3UW83;P63325	Q3UW83;P63325	40S ribosomal protein S10	Rps10	3	3	3	21.4	21.4	21.4	18.371	0	7.67	77325000	25	2	3	2	3	2	3	1	2	3	2	2	2	2	3	2	3	2	3	1	2	3	2	2	2	22.3989	23.0767	22.9132	23.0295	22.795	22.6992	22.4078	23.4831
	1.32825	0.0889683	P63328;P63328-2;A0A2I3BPC5;P48455	P63328;P63328-2	Serine/threonine-protein phosphatase 2B catalytic subunit alpha isoform	Ppp3ca	18	18	10	56.4	56.4	36.5	58.643	0	323.31	5092500000	949	16	16	17	14	16	17	16	17	17	16	16	16	10	10	10	9	10	9	10	9	10	9	10	10	29.016	28.9446	29.0411	28.919	28.9279	28.888	28.7823	28.8709
	0.257659	0.0936095	P63330	P63330	Serine/threonine-protein phosphatase 2A catalytic subunit alpha isoform	Ppp2ca	10	10	1	47.6	47.6	4.2	35.608	0	144.98	1086700000	174	9	9	9	8	9	7	8	9	8	9	9	9	1	1	1	1	1	1	1	1	1	1	1	1	26.752	26.9263	26.7571	26.8439	26.8578	26.4529	26.7661	26.7933
	0.265957	-0.0516822	P67778;Q5SQG5	P67778;Q5SQG5	Prohibitin	Phb	9	9	9	50	50	50	29.82	0	129.77	932530000	187	8	8	8	8	8	8	7	9	8	8	8	9	8	8	8	8	8	8	7	9	8	8	8	9	26.5743	26.3297	26.4798	26.464	26.5702	26.5047	26.5359	26.4043
	0.0404891	-0.00601006	P67984	P67984	60S ribosomal protein L22	Rpl22	3	3	3	39.1	39.1	39.1	14.759	0	60.729	187190000	41	2	3	3	2	2	2	2	3	3	3	3	3	2	3	3	2	2	2	2	3	3	3	3	3	24.3506	24.3088	24.1989	24.25	24.3002	24.3262	24.261	24.3685
	1.78646	-0.418131	P68033;P68134;A0A1D5RM20	P68033;P68134;A0A1D5RM20	Actin, alpha cardiac muscle 1;Actin, alpha skeletal muscle	Actc1;Acta1	15	4	1	43.5	17.5	7.2	42.019	0	60.511	11822000000	332	4	4	3	4	3	3	3	3	4	4	3	3	1	1	0	1	1	1	1	1	1	1	1	1	28.7538	28.953	28.7711	29.3929	29.2349	29.1044	29.4285	29.2191
	0.298913	0.0906239	P68037	P68037	Ubiquitin-conjugating enzyme E2 L3	Ube2l3	3	3	3	35.7	35.7	35.7	17.861	0	51.849	507780000	67	3	3	3	3	3	3	3	3	3	3	3	3	3	3	3	3	3	3	3	3	3	3	3	3	25.6356	25.8349	25.6166	25.7957	25.45	25.5696	25.6473	25.716
	0.945567	-0.180195	P68040	P68040	Guanine nucleotide-binding protein subunit beta-2-like 1;Guanine nucleotide-binding protein subunit beta-2-like 1, N-terminally processed	Gnb2l1	11	11	11	43.5	43.5	43.5	35.076	0	112.67	364210000	93	10	8	9	7	8	8	10	10	9	10	10	10	10	8	9	7	8	8	10	10	9	10	10	10	25.1618	25.0453	24.9995	25.1337	25.3896	25.2238	25.0803	25.1736
	0.144897	-0.0645167	P68181-2;P68181-3;P68181;P68181-4;A0A0G2JFT9;H6TMF5	P68181-2;P68181-3;P68181;P68181-4	cAMP-dependent protein kinase catalytic subunit beta	Prkacb	6	3	3	28.4	17.2	17.2	39.449	0	20.118	95098000	27	1	2	2	2	2	1	2	3	2	3	3	2	1	2	2	2	2	1	2	3	2	3	3	2	22.8747	23.1014	23.0781	23.1043	23.3288	22.8145	23.1184	23.4025
	0.638891	-0.0545718	P68369;P05214	P68369;P05214	Tubulin alpha-1A chain;Tubulin alpha-3 chain	Tuba1a;Tuba3a	29	29	1	77.4	77.4	3.1	50.135	0	323.31	66921000000	5901	27	29	28	29	29	28	27	28	29	29	28	29	1	1	1	1	1	1	1	1	1	1	1	1	32.0673	32.1782	32.0927	32.1669	32.2003	32.1347	32.2151	32.2066
	0.354557	-0.0585175	P68372;G3UZR1	P68372	Tubulin beta-4B chain	Tubb4b	32	32	1	82.2	82.2	2.7	49.83	0	323.31	74569000000	5658	30	28	30	31	30	29	28	30	31	30	30	30	1	1	1	1	1	1	1	1	1	1	1	1	32.3358	32.5303	32.3713	32.4552	32.5357	32.4221	32.4006	32.557
	0.883471	0.15421	P68404-2;P68404	P68404-2;P68404	Protein kinase C beta type	Prkcb	16	15	11	38.3	35.2	26.9	76.893	0	109.31	730110000	220	13	13	14	14	14	9	13	13	14	12	13	11	9	9	10	10	10	6	9	9	10	8	9	8	26.2036	26.3258	26.3054	26.1428	26.2383	25.991	26.0398	26.0636
	0.426918	0.0570272	P68510	P68510	14-3-3 protein eta	Ywhah	13	11	11	55.3	52	52	28.211	0	309.38	1945000000	628	10	10	10	10	10	10	10	10	10	10	10	10	10	10	10	10	10	10	10	10	10	10	10	10	27.6058	27.4917	27.6075	27.5584	27.5487	27.4269	27.6711	27.5339
	0.194056	0.0291704	P70168	P70168	Importin subunit beta-1	Kpnb1	17	17	17	29	29	29	97.183	0	143.38	533280000	114	15	15	14	13	12	11	13	14	15	15	12	13	15	15	14	13	12	11	13	14	15	15	12	13	25.7659	25.6991	25.6661	25.6017	25.6694	25.7725	25.6357	25.7874
	0.263758	0.184422	P70202	P70202	Latexin	Lxn	4	4	4	23	23	23	25.492	0	15.117	125920000	35	3	3	3	2	3	3	3	2	3	2	2	2	3	3	3	2	3	3	3	2	3	2	2	2	23.6951	23.8812	23.6176	23.873	23.0157	23.7519	23.6064	23.6256
	0.03263	0.0213191	P70206;P70208-2;P70208	P70206	Plexin-A1	Plxna1	10	6	6	8.9	5.5	5.5	211.1	0	9.8995	74649000	26	6	3	4	5	2	4	3	5	4	6	5	4	6	3	4	5	2	4	3	5	4	6	5	4	22.6641	23.0006	22.6168	23.0934	22.6513	22.4729	22.7746	23.0496
	0.844695	-0.0685927	P70296;D3Z1V4;D6RHS6;E9QLE5;Q8VIN1-2;Q8VIN1	P70296;D3Z1V4;D6RHS6	Phosphatidylethanolamine-binding protein 1;Hippocampal cholinergic neurostimulating peptide	Pebp1	12	12	12	89.8	89.8	89.8	20.83	0	323.31	8703100000	769	12	12	12	12	11	12	11	12	12	12	12	12	12	12	12	12	11	12	11	12	12	12	12	12	29.607	29.7194	29.6528	29.7305	29.7599	29.6945	29.7064	29.727
	0.908641	-0.186745	Q3UGN9;P70297;A2ARJ0;A0A0A6YVP6	Q3UGN9;P70297	Signal transducing adapter molecule 1	Stam	5	5	5	20.8	20.8	20.8	51.144	0	37.007	138240000	30	4	3	4	4	3	3	3	3	5	4	4	4	4	3	4	4	3	3	3	3	5	4	4	4	23.5901	23.6949	23.3911	23.6745	23.7755	23.7863	23.6306	23.9031
	0.682349	-0.313567	P70333	P70333	Heterogeneous nuclear ribonucleoprotein H2	Hnrnph2	6	2	2	19.2	6.7	6.7	49.279	0	19.904	86883000	48	2	2	2	2	2	2	2	2	2	2	2	2	2	2	2	2	2	2	2	2	2	2	2	2	22.8903	23.1225	22.5994	23.1185	23.4601	22.9742	23.0975	22.823
	0.313683	-0.0590382	P70349;B0R1E3	P70349;B0R1E3	Histidine triad nucleotide-binding protein 1	Hint1	6	6	6	71.4	71.4	71.4	13.777	0	138.15	1144300000	194	6	6	6	5	6	6	6	5	6	6	5	6	6	6	6	5	6	6	6	5	6	6	5	6	26.7183	26.6486	26.4897	26.75	26.6533	26.6303	26.53	26.772
	0.12141	-0.0617034	P70372	P70372	ELAV-like protein 1	Elavl1	4	4	4	15	15	15	36.169	0	10.045	77298000	3	4	2	3	4	4	4	4	3	4	4	4	4	4	2	3	4	4	4	4	3	4	4	4	4	23.1235	23.028	22.6394	22.9467	23.2042	22.8251	22.919	23.1112
	0.738043	-0.108095	Q4FE56;P70398;E9PWA9;F8VPU6;G3UY52	Q4FE56;P70398	Ubiquitin carboxyl-terminal hydrolase;Probable ubiquitin carboxyl-terminal hydrolase FAF-X	Usp9x	15	15	15	9.2	9.2	9.2	290.21	0	55.653	151750000	49	10	12	10	11	14	6	9	11	11	11	8	9	10	12	10	11	14	6	9	11	11	11	8	9	23.662	23.6723	23.8354	23.8016	23.7878	23.9045	23.9856	23.9525
	0.366928	0.102061	P70404	P70404	Isocitrate dehydrogenase [NAD] subunit gamma 1, mitochondrial	Idh3g	10	10	10	40.5	40.5	40.5	42.785	0	247.82	1252200000	300	10	10	9	9	9	9	9	10	10	9	9	9	10	10	9	9	9	9	9	10	10	9	9	9	26.7099	26.8784	26.869	26.6335	26.9212	26.5965	26.9098	26.9411
	0.419611	-0.191987	P70441	P70441	Na(+)/H(+) exchange regulatory cofactor NHE-RF1	Slc9a3r1	3	3	3	12.1	12.1	12.1	38.6	0	10.8	107830000	2	3	3	3	3	3	3	3	3	3	3	3	3	3	3	3	3	3	3	3	3	3	3	3	3	23.0439	23.4182	23.457	23.2133	23.6084	23.6734	23.1361	22.9608
	0.132217	0.10029	Q60817;P70670	Q60817;P70670	Nascent polypeptide-associated complex subunit alpha;Nascent polypeptide-associated complex subunit alpha, muscle-specific form	Naca	3	3	3	19.5	19.5	19.5	23.384	0	12.372	251180000	27	2	2	2	2	2	3	2	3	3	2	2	2	2	2	2	2	2	3	2	3	3	2	2	2	24.7997	25.1054	24.7778	25.3107	24.5358	24.5356	24.8071	23.6619
	1.27357	0.215384	P80313;A0A0N4SV00;A0A0N4SV22	P80313;A0A0N4SV00	T-complex protein 1 subunit eta	Cct7	13	13	13	30.9	30.9	30.9	59.652	0	38.308	214950000	67	7	7	10	8	8	7	8	10	7	10	8	7	7	7	10	8	8	7	8	10	7	10	8	7	24.4887	24.3398	24.3909	24.0599	24.2726	24.2408	24.4135	24.3767
	1.50262	0.114294	P80314;A0A1W2P7B7;A0A1W2P828;A0A1W2P6Q3;A0A1W2P871;A0A1W2P8B6	P80314;A0A1W2P7B7	T-complex protein 1 subunit beta	Cct2	21	21	21	48	48	48	57.477	0	119.91	809570000	227	19	18	19	19	19	17	17	18	18	18	18	18	19	18	19	19	19	17	17	18	18	18	18	18	26.3533	26.2621	26.2753	26.1662	26.2237	26.1579	26.3396	26.4154
	0.280982	-0.0858479	P80315;G5E839;G3UYW5	P80315;G5E839	T-complex protein 1 subunit delta	Cct4	14	14	14	35.4	35.4	35.4	58.066	0	90.887	598540000	143	12	10	10	12	11	9	12	9	10	13	10	10	12	10	10	12	11	9	12	9	10	13	10	10	25.6168	25.9131	25.8429	25.7148	25.9993	25.9163	25.8024	25.9357
	0.263174	-0.0305061	P80316;E0CZA1	P80316	T-complex protein 1 subunit epsilon	Cct5	20	20	20	55.6	55.6	55.6	59.623	0	188.32	715640000	195	17	15	16	18	16	16	16	15	14	19	18	14	17	15	16	18	16	16	16	15	14	19	18	14	26.0023	26.0562	26.0685	25.9989	26.0771	26.1426	26.2648	26.0542
	0.0924252	-0.0103823	P80317;Q61390;B1AT05	P80317	T-complex protein 1 subunit zeta	Cct6a	15	15	15	37.5	37.5	37.5	58.004	0	87.605	584840000	183	14	13	12	13	12	11	12	14	13	15	14	13	14	13	12	13	12	11	12	14	13	15	14	13	25.8122	25.8717	25.7829	25.7952	25.81	25.8928	25.883	25.9286
	0.126099	-0.0218271	P80318;E9Q133;Q3U0I3;F6Q609;F6ZVG8	P80318;E9Q133;Q3U0I3;F6Q609	T-complex protein 1 subunit gamma	Cct3	20	20	20	51.6	51.6	51.6	60.629	0	135.54	910780000	160	18	18	16	18	18	19	15	16	18	14	16	18	18	18	16	18	18	19	15	16	18	14	16	18	26.5518	26.6191	26.413	26.5129	26.5688	26.5677	26.2572	26.4302
	2.84164	0.298155	P84084	P84084	ADP-ribosylation factor 5	Arf5	10	4	3	58.3	26.1	18.3	20.529	0	9.7093	84224000	21	2	2	2	2	3	4	2	2	2	2	2	3	1	1	1	1	2	3	1	1	1	1	1	2	23.163	23.1273	23.2171	22.9019	22.8954	22.8156	23.0604	22.8556
	0.474525	0.152513	P84086	P84086	Complexin-2	Cplx2	4	4	3	37.3	37.3	29.1	15.394	0	72.311	1361300000	341	4	4	4	4	4	4	4	4	4	4	4	4	3	3	3	3	3	3	3	3	3	3	3	3	27	27.227	26.8949	26.8957	27.0559	26.7128	26.8307	27.0504
	0.551238	0.0653737	Q3TWV4;P84091	Q3TWV4;P84091	AP-2 complex subunit mu	Ap2m1	16	16	16	44.1	44.1	44.1	49.389	0	179.91	2200100000	511	16	15	14	14	15	15	15	15	16	15	15	14	16	15	14	14	15	15	15	15	16	15	15	14	27.7595	27.6722	27.7225	27.7108	27.6854	27.5619	27.6077	27.7646
	0.20899	0.142505	P84096;A0A1B0GSL4	P84096	Rho-related GTP-binding protein RhoG	Rhog	5	5	5	45	45	45	21.308	0	94.057	178060000	50	5	3	4	3	4	4	5	4	4	5	4	4	5	3	4	3	4	4	5	4	4	5	4	4	24.0717	24.4268	23.7181	24.2274	23.9116	23.6501	24.4018	24.1448
	0.255503	-0.0594514	P84104-2;P84104;A2A4X6	P84104-2;P84104;A2A4X6	Serine/arginine-rich splicing factor 3	Srsf3;Gm12355	3	2	2	24.2	24.2	24.2	14.203	0	4.9927	84218000	33	2	1	2	2	2	1	1	2	2	2	2	2	2	1	2	2	2	1	1	2	2	2	2	2	23.2262	23.0119	23.1061	23.1095	23.3113	23.1018	22.8387	23.1179
	0.794559	-0.251846	P85094	P85094	Isochorismatase domain-containing protein 2A, mitochondrial	Isoc2a	3	3	3	27.7	27.7	27.7	22.417	0	9.922	103080000	30	3	2	2	3	3	1	1	3	2	3	2	2	3	2	2	3	3	1	1	3	2	3	2	2	22.906	23.3899	23.2256	23.3633	23.4854	23.4283	23.2996	23.4129
	1.20442	0.110648	P97300;H3BIX4;Z4YLB7;P97300-3;P97300-1;A0A0A0MQN8;H3BKA7;P97300-4	P97300;H3BIX4;Z4YLB7;P97300-3;P97300-1	Neuroplastin	Nptn	9	9	9	27.5	27.5	27.5	44.373	0	43.268	1401300000	294	7	7	7	9	8	9	8	7	7	9	8	8	7	7	7	9	8	9	8	7	7	9	8	8	27.1314	27.0175	26.9993	26.9183	26.9367	26.9612	26.9742	26.7768
	0.149448	-0.0531864	P97315	P97315	Cysteine and glycine-rich protein 1	Csrp1	6	6	6	45.6	45.6	45.6	20.583	0	81.123	568460000	93	6	5	5	5	5	6	6	4	5	6	5	5	6	5	5	5	5	6	6	4	5	6	5	5	25.7413	25.5371	25.8268	25.5657	25.9106	25.7884	25.9047	25.5398
	0.627358	0.163748	P97351	P97351	40S ribosomal protein S3a	Rps3a	4	4	4	15.9	15.9	15.9	29.885	0	21.371	272450000	82	4	4	4	4	4	4	4	4	4	4	4	4	4	4	4	4	4	4	4	4	4	4	4	4	24.9421	24.7187	25.1042	24.6944	24.8201	24.7592	24.6229	24.7413
	0.86569	0.15642	P97370	P97370	Sodium/potassium-transporting ATPase subunit beta-3	Atp1b3	4	4	4	25.9	25.9	25.9	31.775	0	15.19	186290000	62	3	3	4	4	4	3	3	4	4	4	4	3	3	3	4	4	4	3	3	4	4	4	4	3	24.1897	24.2547	24.1189	23.9454	23.9693	24.1794	24.2914	24.5009
	0.277428	-0.108568	P97379-2;P97379;A0A0J9YTQ8;A0A0J9YUY8	P97379-2;P97379;A0A0J9YTQ8	Ras GTPase-activating protein-binding protein 2	G3bp2	4	4	3	12	12	9.4	50.784	0	14.554	40979000	22	3	2	3	3	3	3	3	3	3	3	2	4	2	1	2	2	2	2	2	2	2	2	1	3	21.8674	21.9138	22.2636	22.1232	21.9585	22.2888	21.994	21.684
	0.411297	-0.219055	P97441;S4R2S4;S4R169	P97441;S4R2S4;S4R169	Zinc transporter 3	Slc30a3	2	2	2	8.5	8.5	8.5	41.824	0	16.385	72260000	26	2	2	2	2	2	2	2	2	2	2	2	2	2	2	2	2	2	2	2	2	2	2	2	2	22.6109	22.7818	22.9972	23.0784	23.3209	22.6479	21.7842	22.3048
	0.168125	-0.0353394	P97450;E9QAD6	P97450;E9QAD6	ATP synthase-coupling factor 6, mitochondrial	Atp5j	7	7	7	44.4	44.4	44.4	12.496	0	105.85	1023600000	201	6	6	5	6	6	6	6	6	6	6	7	6	6	6	5	6	6	6	6	6	6	6	7	6	26.6486	26.6007	26.5939	26.6684	26.7735	26.5072	26.6324	26.5876
	0.795297	-0.104127	P97807-2;P97807;H3BKG7	P97807-2;P97807	Fumarate hydratase, mitochondrial	Fh	15	15	15	55	55	55	50.052	0	315.21	2100800000	319	15	14	13	14	14	14	14	15	15	15	15	15	15	14	13	14	14	14	14	15	15	15	15	15	27.5529	27.451	27.5492	27.6953	27.645	27.5252	27.6717	27.7538
	0.504575	-0.322615	P97825	P97825	Hematological and neurological expressed 1 protein;Hematological and neurological expressed 1 protein, N-terminally processed	Hn1	4	4	4	37.7	37.7	37.7	16.08	0	5.6458	62146000	3	2	2	2	3	3	3	3	1	3	2	1	3	2	2	2	3	3	3	3	1	3	2	1	3	22.7218	22.7832	22.2345	23.2587	22.5028	22.9459	22.3317	22.7978
	0.2291	-0.0936769	P99024	P99024	Tubulin beta-5 chain	Tubb5	31	5	5	78.6	16.2	16.2	49.67	0	179.82	3366800000	342	5	4	4	5	5	4	4	4	5	5	4	5	5	4	4	5	5	4	4	4	5	5	4	5	27.7242	28.1621	27.6909	28.0547	27.8994	27.9041	28.0279	28.0943
	0.114394	0.024814	P99026	P99026	Proteasome subunit beta type-4	Psmb4	5	5	5	34.1	34.1	34.1	29.116	0	25.345	216250000	21	4	5	5	5	5	3	4	5	5	4	5	5	4	5	5	5	5	3	4	5	5	4	5	5	24.419	24.3194	24.2463	24.3827	24.184	24.3436	24.4656	24.1481
	0.489541	-0.146706	P99027	P99027	60S acidic ribosomal protein P2	Rplp2	5	5	5	70.4	70.4	70.4	11.651	0	51.693	518650000	114	5	5	5	5	5	5	5	5	5	5	5	5	5	5	5	5	5	5	5	5	5	5	5	5	25.6759	25.5144	25.5743	25.7126	25.956	25.536	25.578	25.7312
	0.580392	-0.344581	P99028	P99028	Cytochrome b-c1 complex subunit 6, mitochondrial	Uqcrh	2	2	2	28.1	28.1	28.1	10.435	0	178.88	832560000	99	2	2	2	2	2	2	2	2	2	2	2	2	2	2	2	2	2	2	2	2	2	2	2	2	25.8855	26.3757	26.2116	26.546	26.8629	26.0977	26.2268	26.7135
	0.345546	-0.0895888	P99029-2;P99029;G3UZJ4;H3BJQ7	P99029-2;P99029;G3UZJ4;H3BJQ7	Peroxiredoxin-5, mitochondrial	Prdx5	12	12	12	74.1	74.1	74.1	17.015	0	159.59	3634900000	476	11	11	11	11	11	12	11	11	11	12	11	11	11	11	11	11	11	12	11	11	11	12	11	11	28.2625	28.5142	28.4413	28.5843	28.3419	28.5606	28.4314	28.5122
	0.118398	-0.0303593	Q00493	Q00493	Carboxypeptidase E	Cpe	7	7	7	25.4	25.4	25.4	53.255	0	37.74	254060000	60	5	6	7	6	5	4	4	6	6	6	7	7	5	6	7	6	5	4	4	6	6	6	7	7	24.8053	24.6473	24.7048	24.8961	24.7367	24.6158	24.6047	24.6877
	1.41827	-0.142829	Q00623;CON__P15497	Q00623	Apolipoprotein A-I;Proapolipoprotein A-I;Truncated apolipoprotein A-I	Apoa1	3	3	3	11.4	11.4	11.4	30.615	0	6.4024	51517000	5	3	3	3	2	2	1	3	2	2	3	2	3	3	3	3	2	2	1	3	2	2	3	2	3	22.188	22.2199	22.1836	22.256	22.3518	22.4122	22.3077	22.1639
	0.674797	-0.176283	Q00PI9	Q00PI9	Heterogeneous nuclear ribonucleoprotein U-like protein 2	Hnrnpul2	7	7	7	14	14	14	84.939	0	25.435	146950000	36	4	4	4	5	4	2	5	5	5	6	5	5	4	4	4	5	4	2	5	5	5	6	5	5	23.8219	23.5768	23.9583	24.0412	23.9105	23.9342	23.9558	23.6957
	0.490779	0.153605	Q6PDS5;Q01065;A0A2I3BPC1;A0A2I3BR90	Q6PDS5;Q01065;A0A2I3BPC1;A0A2I3BR90	Calcium/calmodulin-dependent 3,5-cyclic nucleotide phosphodiesterase 1B	Pde1b	6	6	5	16.4	16.4	13.3	52.536	0	22.529	67863000	17	3	2	2	3	3	3	4	3	3	5	5	4	2	2	2	3	3	3	4	3	3	5	5	4	22.6067	22.5766	22.2173	22.3069	22.2226	22.4103	22.0653	21.689
	0.865146	-0.0915769	Q01853	Q01853	Transitional endoplasmic reticulum ATPase	Vcp	27	27	27	47.3	47.3	47.3	89.321	0	323.31	2849500000	570	27	25	24	26	26	23	24	23	25	26	26	26	27	25	24	26	26	23	24	23	25	26	26	26	28.0347	28.0824	28.1018	28.1102	28.2539	28.1296	28.1576	28.061
	0.367278	-0.0509803	Q02053;P31254	Q02053	Ubiquitin-like modifier-activating enzyme 1	Uba1	37	37	37	54.4	54.4	54.4	117.81	0	323.31	3533600000	828	31	34	36	33	32	31	34	34	34	34	32	31	31	34	36	33	32	31	34	34	34	34	32	31	28.4289	28.4462	28.3248	28.5343	28.4334	28.3851	28.4492	28.4978
	0.086428	0.0198828	Q02248;E9Q6A9;D3YUH4;F7BAC9;F7CRC6;D3Z5Q1;E9PW26;D3Z7S6;F6QZ47	Q02248;E9Q6A9	Catenin beta-1	Ctnnb1	19	19	16	44.7	44.7	40.2	85.47	0	164.43	796540000	132	19	17	15	16	16	15	14	14	15	16	14	16	16	14	13	13	13	12	12	12	14	14	12	14	26.3532	26.39	26.1443	26.3054	26.3035	26.2191	26.2118	26.2357
	0.196838	-0.0439135	Q03137-2;Q03137;A0A087WRH4	Q03137-2;Q03137	Ephrin type-A receptor 4	Epha4	8	8	7	13.5	13.5	12.1	103.98	0	64.874	159850000	38	7	8	7	8	8	6	7	7	8	6	7	7	6	7	6	7	7	5	6	6	7	5	6	6	24.2199	24.0594	24.1069	24.2524	24.2353	24.0304	23.8956	23.7938
	1.11311	-0.0675824	Q03265;D3Z6F5;D6RJ16	Q03265;D3Z6F5	ATP synthase subunit alpha, mitochondrial;ATP synthase subunit alpha	Atp5a1	29	29	29	56.2	56.2	56.2	59.752	0	323.31	17183000000	2352	28	28	28	28	28	27	28	27	26	28	27	27	28	28	28	28	28	27	28	27	26	28	27	27	30.4363	30.3719	30.4461	30.4539	30.5098	30.4933	30.4195	30.5222
	0.775096	-0.276449	Q03517;Q4W8U9	Q03517;Q4W8U9	Secretogranin-2;Secretoneurin;Manserin	Scg2	5	5	5	12.8	12.8	12.8	70.643	0	38.687	104720000	31	3	4	3	4	4	4	4	3	4	5	4	4	3	4	3	4	4	4	4	3	4	5	4	4	22.6578	23.065	23.0363	23.1698	23.3793	23.0395	23.2663	23.506
	0.349402	-0.0960789	Q04447	Q04447	Creatine kinase B-type	Ckb	18	18	18	65.4	65.4	65.4	42.713	0	323.31	25823000000	2627	18	18	18	18	18	18	18	18	18	18	18	18	18	18	18	18	18	18	18	18	18	18	18	18	30.7938	30.985	30.8337	31.1396	30.9615	30.7997	30.9855	31.0721
	1.10992	-0.186632	Q05816	Q05816	Fatty acid-binding protein, epidermal	Fabp5	7	7	7	65.9	65.9	65.9	15.137	0	96.251	958830000	133	7	7	7	7	7	7	7	7	7	7	7	7	7	7	7	7	7	7	7	7	7	7	7	7	26.5869	26.3553	26.5532	26.7401	26.6288	26.6865	26.5939	26.1874
	0.332075	-0.0684617	Q06138	Q06138	Calcium-binding protein 39	Cab39	6	6	6	17.9	17.9	17.9	39.842	0	23.161	69270000	46	6	6	6	6	4	5	3	4	5	5	6	5	6	6	6	6	4	5	3	4	5	5	6	5	22.6529	22.8565	22.7851	22.7799	22.7659	22.954	22.451	22.8848
	0.015326	0.00971985	Q06185;Q8BTB6	Q06185;Q8BTB6	ATP synthase subunit e, mitochondrial	Atp5i;Atp5k	5	5	5	57.7	57.7	57.7	8.2355	0	24.197	575640000	89	3	3	4	4	4	3	3	3	4	3	5	3	3	3	4	4	4	3	3	3	4	3	5	3	25.6615	25.7856	26.1747	25.7419	26.148	25.7027	25.8265	25.9211
	0.159165	-0.114552	Q08642	Q08642	Protein-arginine deiminase type-2	Padi2	1	1	1	3.1	3.1	3.1	76.249	0	4.641	37382000	12	1	1	1	1	1	1	1	1	1	1	1	1	1	1	1	1	1	1	1	1	1	1	1	1	21.7332	21.1538	22.0563	21.689	21.8734	21.7246	21.7629	21.9159
	0.206413	0.254869	Q0VE82	Q0VE82	Copine-7	Cpne7	4	3	3	8.4	6.8	6.8	61.89	0	5.6783	36017000	9	2	1	2	3	3	3	2	2	2	1	1	1	2	1	2	3	3	3	2	2	2	1	1	1	21.862	22.3607	21.7722	22.6113	21.1743	21.4446	21.7888	22.2405
	0.146942	0.025746	Q11011;F6QYF8;E9Q039;E9Q6F4;F6V7K3;F7ANF4;F2Z3V5	Q11011;F6QYF8;E9Q039;E9Q6F4	Puromycin-sensitive aminopeptidase	Npepps	31	31	31	49	49	49	103.32	0	269.51	1444500000	326	24	26	24	22	25	21	26	24	24	29	27	26	24	26	24	22	25	21	26	24	24	29	27	26	27.0521	27.1998	27.2001	27.0455	27.1377	27.1915	27.0067	27.0919
	0.202887	0.167566	Q11136	Q11136	Xaa-Pro dipeptidase	Pepd	2	2	2	5.3	5.3	5.3	55.028	0	5.7772	41318000	7	2	2	2	2	2	2	2	2	2	2	2	2	2	2	2	2	2	2	2	2	2	2	2	2	21.9558	22.3915	22.44	22.652	21.7898	21.8428	21.4827	21.9061
	0.262569	0.10361	Q14BI1;B1AXF3	Q14BI1;B1AXF3		Slc24a2	3	3	1	6.8	6.8	2.5	78.976	0	50.441	106740000	35	2	2	2	2	2	2	2	3	3	2	3	2	1	1	1	1	1	1	1	1	1	1	1	1	23.361	23.6452	23.3975	23.598	23.3448	23.1502	23.0126	23.2816
	0.580468	-0.134364	Q80XR6;Q20BD0;Q99020	Q80XR6;Q20BD0;Q99020	Heterogeneous nuclear ribonucleoprotein A/B	Hnrnpab	5	5	5	21.9	21.9	21.9	33.816	0	19.717	161110000	54	2	3	2	3	3	3	2	2	3	5	4	4	2	3	2	3	3	3	2	2	3	5	4	4	23.8029	24.0545	24.0313	23.9678	24.1681	24.1558	23.6507	24.0716
	0.724022	-0.154275	Q2M3X8;Q2M3X8-4;B1B1B8;Q2M3X8-2;Q2M3X8-3	Q2M3X8;Q2M3X8-4;B1B1B8;Q2M3X8-2;Q2M3X8-3	Phosphatase and actin regulator 1;Phosphatase and actin regulator	Phactr1	3	3	3	6.2	6.2	6.2	66.285	0	4.9167	17696000	1	3	2	1	2	1	3	2	3	2	2	3	2	3	2	1	2	1	3	2	3	2	2	3	2	20.5402	20.7148	20.7052	20.9627	20.7009	20.7594	20.8462	20.7126
	0.586207	-0.181126	Q3B7Z2;Q3B7Z2-2;Q8K0C7;Q5QNQ4;Q5QNQ6	Q3B7Z2;Q3B7Z2-2	Oxysterol-binding protein 1	Osbp	4	4	4	9.3	9.3	9.3	88.796	0	13.458	36396000	13	3	3	3	4	3	3	2	3	4	3	2	1	3	3	3	4	3	3	2	3	4	3	2	1	21.7376	22.0433	21.7004	22.0154	21.8576	22.1516	21.5381	21.7755
	0.142946	0.0617599	Q3TA40;Q8R0A7;Q8BQB5;D3YUS2	Q3TA40;Q8R0A7	Uncharacterized protein KIAA0513	6430548M08Rik;Kiaa0513	7	7	7	23.4	23.4	23.4	45.218	0	32.061	162320000	35	7	6	6	6	5	4	6	6	6	5	5	6	7	6	6	6	5	4	6	6	6	5	5	6	23.9859	23.8044	24.2425	23.7818	24.1198	23.9459	23.9317	23.8074
	0.198153	0.0540886	Q3TDK6;Q3TDK6-2;Q3TDK6-3;A0A0J9YUG1	Q3TDK6;Q3TDK6-2;Q3TDK6-3;A0A0J9YUG1	Protein rogdi homolog	Rogdi	11	11	11	50.9	50.9	50.9	32.1	0	65.714	164590000	47	8	8	8	6	7	8	7	5	8	7	8	7	8	8	8	6	7	8	7	5	8	7	8	7	24.2252	24.0369	23.9841	23.9202	24.173	23.9908	23.7766	24.049
	2.30187	-0.31395	Q3TDN2-2;Q3TDN2;D3YUP4;D3Z2H4	Q3TDN2-2;Q3TDN2	FAS-associated factor 2	Faf2	3	3	3	11	11	11	50.23	0	11.971	42244000	13	3	3	2	3	2	3	3	2	2	2	3	2	3	3	2	3	2	3	3	2	2	2	3	2	21.7876	21.8706	21.9644	22.228	22.1479	22.1886	22.1509	21.8223
	1.55134	-0.376345	Z4YKA3;Z4YKB8;Q3TEA8-3;Q3TEA8-2;Q3TEA8;A2AM65;A2AM70;A2AM62;A2AM63	Z4YKA3;Z4YKB8;Q3TEA8-3;Q3TEA8-2;Q3TEA8;A2AM65	Heterochromatin protein 1-binding protein 3	Hp1bp3	4	4	4	12	12	12	56.824	0	17.184	127590000	29	3	3	4	3	4	4	4	4	3	2	3	3	3	3	4	3	4	4	4	4	3	2	3	3	23.3076	23.5457	23.5571	23.6955	23.899	23.9448	23.3831	23.6144
	0.127141	0.0744642	Q3TGS9;V9GWV1;V9GXM1;Q9EPJ9-2;Q9EPJ9	Q3TGS9;V9GWV1;V9GXM1;Q9EPJ9-2;Q9EPJ9	ADP-ribosylation factor GTPase-activating protein 1	Arfgap1	8	8	8	33	33	33	43.183	0	90.891	111920000	26	6	7	6	8	5	7	5	7	6	6	6	6	6	7	6	8	5	7	5	7	6	6	6	6	23.8813	23.4531	23.5906	23.7572	23.724	23.2203	23.1102	23.3639
	0.332927	0.0971514	Q3THE2;Q6ZWQ9;Q9CQ19;D3Z249;D3YV37	Q3THE2;Q6ZWQ9;Q9CQ19	Myosin regulatory light chain 12B;Myosin regulatory light polypeptide 9	Myl12b;Myl12a;Myl9	6	6	6	44.2	44.2	44.2	19.779	0	76.39	286120000	84	5	4	5	4	5	5	3	5	5	4	6	5	5	4	5	4	5	5	3	5	5	4	6	5	24.7995	24.8862	24.9383	24.6374	25.0017	24.6933	24.6259	25.0344
	1.53471	-0.202284	Q3THK7	Q3THK7	GMP synthase [glutamine-hydrolyzing]	Gmps	13	13	13	27.3	27.3	27.3	76.723	0	96.267	224770000	59	12	11	10	9	11	10	10	11	8	9	12	11	12	11	10	9	11	10	10	11	8	9	12	11	24.5436	24.3743	24.3807	24.6406	24.6757	24.5892	24.4634	24.2244
	0.659581	0.953965	Q3TL72;Q8C878-2;Q8C878	Q3TL72;Q8C878-2;Q8C878	NEDD8-activating enzyme E1 catalytic subunit	Uba3	3	3	3	14.1	14.1	14.1	49.957	0	4.5255	59554000	9	2	3	2	3	2	1	1	3	2	2	3	2	2	3	2	3	2	1	1	3	2	2	3	2	22.8408	22.9134	22.388	22.1982	22.5716	20.5105	22.5965	22.0864
	0.0865031	-0.0476913	Q3TML0;Q922R8	Q3TML0;Q922R8	Protein disulfide-isomerase A6	Pdia6	6	6	6	22.7	22.7	22.7	48.689	0	37.186	222300000	71	5	5	4	6	5	3	5	5	6	6	5	5	5	5	4	6	5	3	5	5	6	6	5	5	24.4768	24.4144	24.5436	24.1668	24.8234	24.5878	24.119	24.1909
	0.167801	-0.0355822	Q3TU36	Q3TU36		Rap1gds1	17	17	1	42.9	42.9	2.3	66.005	0	259.62	1120300000	272	15	15	14	16	15	15	15	17	17	17	16	17	1	1	1	1	1	1	1	1	1	1	1	1	26.7739	26.6054	26.6756	26.5942	26.7757	26.7918	26.747	26.9555
	0.816417	-0.157111	Q3TVK3;Q9Z2W0;Q8BPW9;A0A087WS31;A0A087WSE6;A0A087WRC1;A0A087WSU0;A0A087WNX3;A0A087WSD3	Q3TVK3;Q9Z2W0;Q8BPW9	Aspartyl aminopeptidase	Dnpep	11	11	11	38.9	38.9	38.9	52.466	0	42.681	140180000	29	8	6	5	4	6	4	6	7	7	7	4	8	8	6	5	4	6	4	6	7	7	7	4	8	23.7422	23.634	23.5616	23.6597	23.8629	23.8866	23.9371	23.7612
	1.05816	-0.361739	Q3TXS7;J3QN38;D6RGR5	Q3TXS7	26S proteasome non-ATPase regulatory subunit 1	Psmd1	7	7	7	15.1	15.1	15.1	105.73	0	25.484	247280000	47	4	7	4	4	4	5	6	5	6	5	5	7	4	7	4	4	4	5	6	5	6	5	5	7	24.3808	24.201	24.3666	24.4979	24.5602	24.9755	24.5139	24.5726
	0.696519	-0.30725	Q3U0V1;A0A0G2JE55;A0A0G2JGT1	Q3U0V1	Far upstream element-binding protein 2	Khsrp	8	8	7	14.8	14.8	13	76.775	0	34.035	172130000	50	6	7	7	7	8	6	7	7	7	8	7	7	5	6	6	6	7	5	6	6	6	7	6	6	23.779	23.6952	24.1367	23.9472	24.1301	24.4553	23.8228	24.2663
	0.208739	0.117893	Q3U1J4	Q3U1J4	DNA damage-binding protein 1	Ddb1	10	10	10	10.5	10.5	10.5	126.85	0	46.202	188760000	32	8	9	7	7	8	10	9	8	7	8	7	7	8	9	7	7	8	10	9	8	7	8	7	7	24.342	24.1585	24.3675	24.5231	23.8014	24.1899	24.4765	24.0056
	0.460578	0.0639877	Q3U2G2;Q61316	Q3U2G2;Q61316	Heat shock 70 kDa protein 4	Hspa4	24	24	22	46.1	46.1	42.5	94.208	0	293.56	1690100000	411	22	22	21	18	21	20	19	22	21	21	23	21	20	20	19	16	19	19	18	20	19	19	21	20	27.4199	27.323	27.4306	27.3931	27.3577	27.2308	27.2822	27.3368
	0.327484	-0.187768	Q3U367;Q9JLJ2	Q3U367;Q9JLJ2	4-trimethylaminobutyraldehyde dehydrogenase	Aldh9a1	5	5	5	13.5	13.5	13.5	55.887	0	18.189	61300000	17	2	3	4	3	3	3	3	3	4	3	3	4	2	3	4	3	3	3	3	3	4	3	3	4	22.6778	22.0059	22.477	22.3838	22.8133	22.5268	22.5353	22.9463
	0.898298	0.327525	Q3U422	Q3U422		Ndufv3	2	2	2	11.1	11.1	11.1	50.498	0	9.8811	34522000	8	2	2	2	2	1	2	1	2	1	2	2	2	2	2	2	2	1	2	1	2	1	2	2	2	22.2001	21.7864	21.6591	21.5565	21.4711	21.6356	21.9648	20.9571
	1.20964	-0.544227	Q3U741;Q501J6;Q3TU25;Q501J6-2	Q3U741;Q501J6;Q3TU25;Q501J6-2	Probable ATP-dependent RNA helicase DDX17	Ddx17	10	7	7	19.3	14	14	72.584	0	22.528	66602000	6	4	4	3	4	5	3	2	3	4	5	6	5	4	4	3	4	5	3	2	3	4	5	6	5	22.1119	22.7457	22.2205	22.7893	22.8635	23.0579	22.8494	22.5882
	0.485681	-0.132904	Q3UE92;Q6P1B1;S4R1I3;S4R228	Q3UE92;Q6P1B1;S4R1I3	Xaa-Pro aminopeptidase 1	Xpnpep1	7	7	7	19.1	19.1	19.1	74.559	0	30.215	214880000	37	7	6	7	7	6	5	4	7	7	6	5	5	7	6	7	7	6	5	4	7	7	6	5	5	24.5647	24.2373	24.4129	24.6331	24.5845	24.396	24.2194	24.6002
	0.244315	-0.0969613	Q3UF95;Q9Z1R2;G3UYQ2;A0A1B0GX81;G3UZT6;G3UXT8;G3UYZ0;G3V013	Q3UF95;Q9Z1R2;G3UYQ2;A0A1B0GX81;G3UZT6	Large proline-rich protein BAG6	Bag6	8	8	8	12.5	12.5	12.5	119.14	0	26.854	99167000	11	8	7	3	3	5	3	7	6	5	7	4	5	8	7	3	3	5	3	7	6	5	7	4	5	23.4273	23.2472	22.9565	23.2335	23.4593	23.2291	23.3484	23.3092
	0.114802	-0.0336304	Q3UGR5;Q3UGR5-2;D3YZI3	Q3UGR5	Haloacid dehalogenase-like hydrolase domain-containing protein 2	Hdhd2	6	6	6	43.2	43.2	43.2	28.73	0	34.343	568840000	117	5	5	5	6	5	5	4	5	4	5	5	5	5	5	5	6	5	5	4	5	4	5	5	5	25.7879	25.8834	25.766	26.0103	25.6649	25.8629	25.7787	25.8175
	0.716875	0.0778923	Q5SV64;Q3UH59;Q61879;Q8BXF2;F2Z494	Q5SV64;Q3UH59;Q61879	Myosin-10	Myh10	39	39	28	29.2	29.2	22.2	232.47	0	323.31	1054300000	340	33	32	32	29	32	29	30	30	31	31	33	27	22	21	22	20	23	19	20	20	20	24	23	19	26.6707	26.7046	26.8179	26.6324	26.6974	26.6298	26.6074	26.5959
	0.024163	-0.00649897	Q3UHB1;A0A1W2P799	Q3UHB1;A0A1W2P799	5-nucleotidase domain-containing protein 3	Nt5dc3	16	16	16	47.8	47.8	47.8	63.17	0	91.936	338440000	93	13	12	14	13	13	11	11	12	13	11	9	12	13	12	14	13	13	11	11	12	13	11	9	12	25.2677	25.0909	25.3018	25.134	25.3439	25.202	25.0283	25.0291
	0.00126076	0.000773112	Q3UHD9-2;Q3UHD9	Q3UHD9-2;Q3UHD9	Arf-GAP with GTPase, ANK repeat and PH domain-containing protein 2	Agap2	9	9	9	12.5	12.5	12.5	122.1	0	56.442	158560000	26	7	8	7	8	8	6	7	8	6	7	6	4	7	8	7	8	8	6	7	8	6	7	6	4	24.054	23.7027	23.9606	23.5672	24.0371	24.1107	24.1559	23.7689
	0.259041	0.146262	Q3UHG5;Q62283	Q3UHG5;Q62283	Tetraspanin;Tetraspanin-7	Tspan7	1	1	1	6.5	6.5	6.5	25.412	0	21.818	17942000	15	1	1	1	1	1	1	1	1	1	1	1	1	1	1	1	1	1	1	1	1	1	1	1	1	21.156	20.4265	20.9644	20.5957	20.7567	20.7557	20.8135	20.9735
	0.00857011	-0.00190099	Q3UHJ0;Q3UHJ0-2;A0A0N4SVA1	Q3UHJ0;Q3UHJ0-2	AP2-associated protein kinase 1	Aak1	24	24	24	49.1	49.1	49.1	103.35	0	237.75	1090500000	265	22	22	22	17	19	17	18	19	22	19	21	21	22	22	22	17	19	17	18	19	22	19	21	21	26.7558	26.6772	26.8368	26.7933	26.8344	26.6479	26.6216	26.7473
	0.952655	0.131622	Q3UHL1;A0A0A6YW88;A0A0A6YXI7;A0A0A6YW08	Q3UHL1;A0A0A6YW88	CaM kinase-like vesicle-associated protein	Camkv	18	18	18	49.6	49.6	49.6	54.819	0	289.48	1711400000	394	16	17	18	16	15	17	17	16	16	18	16	15	16	17	18	16	15	17	17	16	16	18	16	15	27.5054	27.4891	27.4375	27.4455	27.2341	27.3576	27.3976	27.2378
	1.00422	-0.133747	Q3ULJ0;Q3ULJ0-2;D3Z0L6;Q6NXY9	Q3ULJ0;Q3ULJ0-2	Glycerol-3-phosphate dehydrogenase 1-like protein	Gpd1l	9	8	8	35	31.9	31.9	38.225	0	23.436	97923000	68	6	5	6	5	6	5	4	4	5	6	4	4	6	5	6	5	6	5	4	4	5	6	4	4	23.049	22.92	22.9688	23.1055	23.0306	23.203	23.1457	22.9577
	0.10668	-0.0228914	Q3UM45;F6TGJ2;A0A087WRA7	Q3UM45	Protein phosphatase 1 regulatory subunit 7	Ppp1r7	14	14	14	52.4	52.4	52.4	41.291	0	116.83	562280000	137	12	11	12	12	12	13	12	12	11	13	12	14	12	11	12	12	12	13	12	12	11	13	12	14	25.753	25.5788	25.6938	25.6872	25.8038	25.6033	25.8333	25.9599
	0.0351054	0.0132764	Q3UMR5;Q3UMR5-2	Q3UMR5	Calcium uniporter protein, mitochondrial	Mcu	7	7	7	27.1	27.1	27.1	39.681	0	65.832	257400000	55	6	6	6	6	4	5	5	4	5	6	6	5	6	6	6	6	4	5	5	4	5	6	6	5	24.677	24.6212	24.8672	24.5295	24.8899	24.7061	24.6472	24.6561
	0.167992	-0.0559985	Q3UNH4	Q3UNH4	G protein-regulated inducer of neurite outgrowth 1	Gprin1	8	8	8	17.2	17.2	17.2	95.495	0	38.517	210120000	54	5	8	7	7	6	6	5	8	7	6	7	8	5	8	7	7	6	6	5	8	7	6	7	8	24.3624	24.4522	24.5282	24.3429	24.7296	24.4383	24.3281	24.3325
	0.160363	0.126228	S4R2A9;Q3UPL0-2;Q3UPL0;S4R192;S4R256	S4R2A9;Q3UPL0-2;Q3UPL0	Protein transport protein Sec31A	Sec31a	4	4	4	7.4	7.4	7.4	100.98	0	7.5985	110520000	10	1	1	1	2	1	1	2	2	3	1	2	3	1	1	1	2	1	1	2	2	3	1	2	3	22.9907	23.8815	23.4165	23.5776	23.25	23.0823	23.5951	23.598
	0.754147	-0.223552	Q3USC7;Q8VE33;A2A5H8	Q3USC7;Q8VE33;A2A5H8	Ganglioside-induced differentiation-associated protein 1-like 1	Gdap1l1	13	13	13	55.6	55.6	55.6	41.92	0	106.81	540870000	138	9	12	11	10	11	10	10	11	10	11	8	10	9	12	11	10	11	10	10	11	10	11	8	10	25.6058	25.5744	25.8149	25.8046	26.1131	25.7482	25.4327	25.8723
	0.169731	-0.140134	Q3UUG6-2;Q3UUG6;Q8BRB6;A0A0J9YV32;A0A0J9YUB2	Q3UUG6-2;Q3UUG6;Q8BRB6;A0A0J9YV32	TBC1 domain family member 24	Tbc1d24	8	8	8	18.9	18.9	18.9	62.633	0	23.708	150580000	19	7	6	6	6	6	3	6	8	8	7	5	6	7	6	6	6	6	3	6	8	8	7	5	6	23.6985	23.9549	23.4615	24.1048	23.2905	24.14	23.9253	24.0428
	0.506302	-0.114564	Q3UY21;Q61885;Q29ZQ5	Q3UY21;Q61885;Q29ZQ5	Myelin-oligodendrocyte glycoprotein	Mog	7	7	7	24.3	24.3	24.3	28.374	0	113.21	1483300000	149	7	7	6	7	6	7	7	7	7	7	7	7	7	7	6	7	6	7	7	7	7	7	7	7	27.0216	27.2274	27.0315	27.2154	27.3305	27.0783	27.2425	27.4665
	2.18873	-0.236515	Q3UYC0;Q3UYC0-2;E0CYP3	Q3UYC0;Q3UYC0-2	Protein phosphatase 1H	Ppm1h	9	9	9	35.5	35.5	35.5	56.379	0	31.798	226770000	45	8	8	8	7	8	8	5	8	9	9	6	7	8	8	8	7	8	8	5	8	9	9	6	7	24.3243	24.324	24.3591	24.5225	24.6598	24.5346	24.4768	24.6707
	0.694443	0.168081	Q3UZJ4;Q61151;A0A1W2P838;A0A1W2P7D8	Q3UZJ4;Q61151	Serine/threonine-protein phosphatase 2A 56 kDa regulatory subunit epsilon isoform	Ppp2r5e	9	9	7	29.1	29.1	23.6	50.83	0	66.994	224950000	65	9	9	8	8	9	6	7	7	7	9	7	9	7	7	6	7	7	4	6	5	5	7	5	7	24.4505	24.5168	24.7134	24.4813	24.4563	24.2388	24.5934	24.441
	1.15905	-0.18407	Q3V117;Q91V92;Q3TS02	Q3V117;Q91V92	ATP-citrate synthase	Acly	17	17	17	22.7	22.7	22.7	120.79	0	99.762	418720000	123	15	13	15	14	15	14	11	15	14	16	16	17	15	13	15	14	15	14	11	15	14	16	16	17	25.2005	25.3371	25.1568	25.4106	25.5066	25.3293	25.2523	25.3086
	0.827936	-0.243006	Q3V156;Q91XL9-3;Q91XL9-2;Q91XL9;D3Z7I9;D3YZ66	Q3V156;Q91XL9-3;Q91XL9-2;Q91XL9;D3Z7I9;D3YZ66	Oxysterol-binding protein;Oxysterol-binding protein-related protein 1	Osbpl1a	6	6	6	22	22	22	63.433	0	26.142	100910000	26	5	5	5	3	4	4	3	6	5	4	4	4	5	5	5	3	4	4	3	6	5	4	4	4	22.7474	23.0677	23.1983	23.2009	23.2794	23.2621	22.9021	22.9502
	0.831727	-0.298609	Q3V3R1	Q3V3R1	Monofunctional C1-tetrahydrofolate synthase, mitochondrial	Mthfd1l	10	10	10	18.1	18.1	18.1	105.73	0	29.554	87582000	19	8	6	3	5	6	4	6	4	5	6	4	5	8	6	3	5	6	4	6	4	5	6	4	5	22.9163	22.6017	22.8417	22.813	23.2453	23.1971	23.237	23.2058
	0.625813	0.0910892	Q4KMM3;Q4KMM3-4;Q4KMM3-2;E9Q0A7;Q4KMM3-3;A0A2R8W6N3;A0A2R8VHT3;A0A2R8VI09;B1H3M0;A0A2R8VKF8;A0A2R8VHF5;A0A2R8W6J0	Q4KMM3;Q4KMM3-4;Q4KMM3-2;E9Q0A7;Q4KMM3-3;A0A2R8W6N3	Oxidation resistance protein 1	Oxr1	20	20	20	26.1	26.1	26.1	95.911	0	260.26	803400000	179	16	18	17	18	16	14	17	16	15	16	19	13	16	18	17	18	16	14	17	16	15	16	19	13	26.3548	26.5226	26.3332	26.3428	26.2595	26.3352	26.2172	26.1837
	0.0850724	-0.0244077	Q4VA93;P20444;Q3TQ39	Q4VA93;P20444	Protein kinase C;Protein kinase C alpha type	Prkca	12	6	6	28.7	14.9	14.9	76.823	0	32.891	107430000	39	6	4	4	3	4	3	4	5	4	4	4	5	6	4	4	3	4	3	4	5	4	4	4	5	23.3981	23.1534	23.0991	23.2723	23.1555	23.296	23.4826	23.6278
	0.678224	-0.262661	Q4VAE3	Q4VAE3	Transmembrane protein 65	Tmem65	3	3	3	13.7	13.7	13.7	24.918	0	9.7664	62128000	18	2	1	2	2	1	2	1	3	1	2	2	2	2	1	2	2	1	2	1	3	1	2	2	2	21.8694	22.0628	22.1576	22.5662	22.279	22.0327	22.4409	23.3928
	0.751325	-0.122138	Q505D7;A0A0U1RPB1	Q505D7	Optic atrophy 3 protein homolog	Opa3	3	3	3	28.5	28.5	28.5	20.11	0	17.908	56562000	16	3	3	3	3	3	2	3	3	2	3	2	3	3	3	3	3	3	2	3	3	2	3	2	3	22.5002	22.5011	22.4339	22.551	22.7411	22.5095	22.2784	22.409
	0.147923	0.075112	Q561M1;Q9D358-2;Q9D358;A0A1W2P7X3	Q561M1;Q9D358-2;Q9D358;A0A1W2P7X3	Low molecular weight phosphotyrosine protein phosphatase	Acp1	3	3	3	20.3	20.3	20.3	17.922	0	12.169	97230000	76	2	3	2	3	2	2	3	2	2	3	3	2	2	3	2	3	2	2	3	2	2	3	3	2	23.1495	23.2842	23.4	22.9523	23.5387	23.1173	23.0265	23.3412
	0.286847	-0.0418835	Q5EBJ4	Q5EBJ4	Ermin	Ermn	7	7	7	41.3	41.3	41.3	32.148	0	36.385	181150000	48	4	5	6	5	6	5	5	6	5	6	7	6	4	5	6	5	6	5	5	6	5	6	7	6	24.1225	24.0692	24.0233	24.1843	24.0133	24.143	24.2822	24.1462
	0.0952818	-0.0211442	Q5F258;Q68FF6;F6WV69;F7BIK4;Q80XR8;J3QK07;D3Z1I2;E9PVA6;Q9JLQ2	Q5F258;Q68FF6	ARF GTPase-activating protein GIT1	Git1	12	12	12	29.7	29.7	29.7	84.194	0	63.887	225240000	64	9	9	6	11	9	7	9	9	10	10	9	9	9	9	6	11	9	7	9	9	10	10	9	9	24.6116	24.4341	24.3882	24.4207	24.5195	24.5572	24.4658	24.4632
	0.472016	0.330846	Q5F285	Q5F285	Transmembrane protein 256	Tmem256	1	1	1	24.8	24.8	24.8	11.655	0	8.9823	48375000	19	1	1	1	1	1	1	1	1	1	1	1	1	1	1	1	1	1	1	1	1	1	1	1	1	22.2975	22.7491	22.2677	22.2557	22.466	21.6	21.9081	21.9216
	0.475631	-0.0674477	Q5ICG5;Q8R1X1;Q91WC3;Q91WC3-2;Q5F2C5;Q8BYJ0;E9Q7Y2;Q8C028;F6WYN6;B0QZJ6;B1ARG5	Q5ICG5;Q8R1X1;Q91WC3;Q91WC3-2;Q5F2C5;Q8BYJ0;E9Q7Y2	Long-chain-fatty-acid--CoA ligase 6	Acsl6	21	21	21	44.5	44.5	44.5	77.969	0	96.452	490040000	136	18	16	15	16	12	13	17	17	19	19	16	18	18	16	15	16	12	13	17	17	19	19	16	18	25.4238	25.5546	25.4868	25.4718	25.5557	25.6401	25.6144	25.7236
	0.404944	-0.14429	Q5M8N0;F7C0H6	Q5M8N0;F7C0H6	CB1 cannabinoid receptor-interacting protein 1	Cnrip1	5	5	5	39	39	39	18.612	0	54.007	525340000	114	5	5	5	5	5	5	4	5	5	5	5	5	5	5	5	5	5	5	4	5	5	5	5	5	25.5678	25.5886	25.9052	25.6728	26.0284	25.7933	25.6307	25.7815
	1.66303	0.239341	Q8JZR2;Q5ND50;Q64010-2;Q64010;F7D232;Q3TQV3	Q8JZR2;Q5ND50;Q64010-2;Q64010;F7D232	Adapter molecule crk	Crk	6	6	6	47.5	47.5	47.5	22.889	0	51.762	171790000	49	6	4	4	4	3	4	5	4	5	5	4	5	6	4	4	4	3	4	5	4	5	5	4	5	24.1558	24.1255	24.1909	24.0361	23.8221	23.896	24.1585	23.9394
	0.0388138	0.0254313	Q5PPR2;Q6P1Y9;Q8R3S6	Q5PPR2;Q6P1Y9;Q8R3S6	Exocyst complex component 1	Exoc1	3	3	3	7.1	7.1	7.1	100.19	0	10.948	46883000	16	2	3	2	2	1	1	2	3	3	3	3	2	2	3	2	2	1	1	2	3	3	3	3	2	22.4682	21.8854	22.4896	22.3471	22.3671	22.0527	22.1461	22.3733
	0.616709	0.171005	Q5PR73	Q5PR73	GTP-binding protein Di-Ras2	Diras2	7	7	7	49.2	49.2	49.2	22.498	0	44.849	203090000	76	7	7	7	5	6	4	7	6	5	7	6	7	7	7	7	5	6	4	7	6	5	7	6	7	24.2689	24.4765	24.4104	24.2856	24.0012	24.3559	24.2988	24.3295
	0.321702	-0.208764	Q5SDA5	Q5SDA5	Retinal guanylyl cyclase 2	Gucy2f	1	1	1	0.9	0.9	0.9	124.42	0.0017905	2.7821	42392000	11	1	1	1	1	1	1	1	1	1	1	1	1	1	1	1	1	1	1	1	1	1	1	1	1	22.3509	21.8929	21.5622	21.8747	22.3153	22.2423	22.155	22.5401
	0.0346354	0.0129693	Q5SQB0;Q61937;Q9DAY9;Q5SQB5	Q5SQB0;Q61937;Q9DAY9;Q5SQB5	Nucleophosmin	Npm1	6	6	6	31.4	31.4	31.4	29.524	0	93.606	228000000	112	4	5	5	5	4	5	4	6	5	5	4	5	4	5	5	5	4	5	4	6	5	5	4	5	24.4588	24.3079	24.2769	24.5487	24.2937	24.1622	24.5814	24.4127
	0.283789	0.0233301	Q5SQX6;F6QD74;G3UZI5	Q5SQX6;F6QD74	Cytoplasmic FMR1-interacting protein 2	Cyfip2	33	33	20	37.4	37.4	23.5	145.66	0	246.75	1314700000	341	28	30	29	27	29	21	22	24	26	27	26	24	17	18	18	15	17	12	12	14	17	16	14	14	27.008	26.9685	27.0606	26.9505	27.0149	27.0017	26.9731	27.155
	1.6078	-0.229977	Q5SRX1-3;Q5SRX1-4;Q5SRX1-2;Q5SRX1;Q5SXA5;Q5SXA4;Q5SRX1-5;F6RBX1;F6ZDJ1	Q5SRX1-3;Q5SRX1-4;Q5SRX1-2;Q5SRX1;Q5SXA5;Q5SXA4;Q5SRX1-5	TOM1-like protein 2	Tom1l2	11	11	11	38.4	38.4	38.4	48.407	0	153.95	487300000	106	9	9	10	9	10	8	9	9	10	10	10	11	9	9	10	9	10	8	9	9	10	10	10	11	25.4464	25.3876	25.2944	25.6735	25.5124	25.6324	25.41	25.4752
	0.3207	0.289052	Q5SS83;Q60634-3;Q60634-2;Q60634	Q5SS83;Q60634-3;Q60634-2;Q60634	Flotillin-2	Flot2	6	6	6	18.9	18.9	18.9	47.116	0	16.939	52464000	4	4	4	5	5	5	2	5	3	4	3	4	4	4	4	5	5	5	2	5	3	4	3	4	4	22.4935	22.4031	22.3261	22.3464	21.4014	22.6077	22.1888	22.0845
	1.02198	0.275256	Q5SUR0;F6RUL9	Q5SUR0	Phosphoribosylformylglycinamidine synthase	Pfas	6	6	6	7.2	7.2	7.2	144.63	0	11.709	118590000	34	5	3	2	1	2	3	3	4	2	4	4	2	5	3	2	1	2	3	3	4	2	4	4	2	23.6331	23.4427	23.8702	23.4214	23.3681	23.3307	23.4461	23.6196
	0.297132	0.202969	Q5SW88;Q5SW87;P62821;Q5SW86	Q5SW88;Q5SW87;P62821;Q5SW86	Ras-related protein Rab-1A	Rab1;Rab1A	6	5	2	34.7	29.2	16.3	22.372	0	102.01	441520000	136	5	4	5	3	3	4	4	4	4	3	3	5	2	2	2	2	2	2	2	2	2	2	2	2	25.2581	25.161	25.0865	25.2146	25.2611	24.421	25.282	25.6255
	0.141692	0.0106767	Q5SXR6;Q68FD5	Q5SXR6;Q68FD5	Clathrin heavy chain;Clathrin heavy chain 1	Cltc	92	92	80	66.6	66.6	59.5	191.98	0	323.31	23839000000	3402	84	84	85	88	86	77	83	87	83	82	86	81	74	74	75	76	74	68	74	76	73	71	75	70	31.1611	31.0992	31.1273	31.1416	31.1382	31.0757	31.1762	31.1513
	0.0200212	-0.0104917	Q5XG69	Q5XG69	Soluble lamin-associated protein of 75 kDa	Fam169a	2	2	2	8.1	8.1	8.1	73.239	0	5.9635	28980000	4	2	1	2	2	1	2	2	1	1	2	1	2	2	1	2	2	1	2	2	1	1	2	1	2	21.5453	21.4933	21.7453	21.5588	21.8968	21.3599	21.1666	21.3831
	0.00746789	-0.00821622	Q5XJF6;P53026	Q5XJF6;P53026	Ribosomal protein;60S ribosomal protein L10a	Rpl10a	5	5	5	26.3	26.3	26.3	24.831	0	36.196	179120000	45	5	5	5	5	5	5	5	5	5	5	5	5	5	5	5	5	5	5	5	5	5	5	5	5	23.9774	24.4844	23.8946	24.3425	23.5142	24.5243	23.9313	24.1092
	0.0974994	-0.0211811	Q60597;Q60597-3;Z4YJV4;Q60597-2;Q60597-4;Q5SVY0;Q5SVY1	Q60597;Q60597-3;Z4YJV4;Q60597-2;Q60597-4	2-oxoglutarate dehydrogenase, mitochondrial	Ogdh	33	33	28	40.5	40.5	37	116.45	0	239.39	1679500000	390	28	26	28	29	29	26	29	29	32	31	30	29	23	21	23	24	24	21	24	24	27	26	25	24	27.2348	27.3468	27.1842	27.1703	27.3823	27.2768	27.4368	27.3148
	0.165379	-0.0374457	Q921L6;Q60598	Q921L6;Q60598	Src substrate cortactin	Cttn	10	10	10	23.8	23.8	23.8	57.086	0	60.031	256060000	73	6	6	7	5	4	3	4	5	5	6	7	5	6	6	7	5	4	3	4	5	5	6	7	5	24.8401	24.6125	24.5878	24.6898	24.775	24.6879	24.9048	24.6011
	0.305578	-0.0753956	Q60625	Q60625	Intercellular adhesion molecule 5	Icam5	13	13	13	23.8	23.8	23.8	96.944	0	86.28	518070000	106	11	13	12	11	12	11	8	10	13	11	12	12	11	13	12	11	12	11	8	10	13	11	12	12	25.4082	25.656	25.5196	25.7227	25.6086	25.4788	25.3944	25.6035
	0.772497	0.596431	Q60676;F7BX26	Q60676;F7BX26	Serine/threonine-protein phosphatase 5;Serine/threonine-protein phosphatase	Ppp5c	4	4	4	10.8	10.8	10.8	56.876	0	12.562	67095000	5	3	4	4	4	3	2	3	3	4	4	4	4	3	4	4	4	3	2	3	3	4	4	4	4	23.7831	22.6711	22.8603	22.6443	22.3325	22.5483	22.7138	22.5145
	0.14853	0.053662	Q60692	Q60692	Proteasome subunit beta type-6	Psmb6	4	4	4	29	29	29	25.378	0	21.547	119120000	69	4	4	4	3	4	3	3	4	4	3	4	3	4	4	4	3	4	3	3	4	4	3	4	3	23.5852	23.4968	23.5098	23.3184	23.7383	23.3741	23.613	23.6857
	0.0309361	0.0118179	Q60737;A2ANR6	Q60737	Casein kinase II subunit alpha	Csnk2a1	10	10	10	34.3	34.3	34.3	45.133	0	57.061	388910000	87	9	10	10	10	9	8	9	9	9	9	9	9	9	10	10	10	9	8	9	9	9	9	9	9	25.1713	25.6092	25.3179	25.3554	25.3562	25.3513	25.2046	25.3578
	0.0629508	-0.0995731	Q60790	Q60790	Ras GTPase-activating protein 3	Rasa3	2	2	2	3.6	3.6	3.6	95.986	0.00092635	3.2509	23573000	3	1	1	1	1	1	1	2	1	1	1	1	1	1	1	1	1	1	1	2	1	1	1	1	1	20.1757	21.9781	20.8959	20.8725	21.0405	21.4354	20.8501	22.1991
	0.157345	0.0160681	Q60864	Q60864	Stress-induced-phosphoprotein 1	Stip1	21	21	21	41.6	41.6	41.6	62.581	0	258.77	997310000	376	19	19	18	19	18	17	17	19	19	19	18	19	19	19	18	19	18	17	17	19	19	19	18	19	26.5177	26.5985	26.5318	26.5187	26.4919	26.5892	26.3764	26.4924
	1.10946	-0.19783	Q60902-4;Q60902-2;Q60902;A0A1D5RLS1;Q60902-3	Q60902-4;Q60902-2;Q60902;A0A1D5RLS1;Q60902-3	Epidermal growth factor receptor substrate 15-like 1	Eps15l1	8	8	8	15.1	15.1	15.1	84.751	0	34.712	107900000	27	7	7	7	7	5	4	7	5	6	7	8	6	7	7	7	7	5	4	7	5	6	7	8	6	23.3549	23.2694	23.2915	23.4967	23.3681	23.6445	23.4372	23.3495
	1.62774	-0.179995	Q60932-2;Q60932;F2Z471	Q60932-2;Q60932;F2Z471	Voltage-dependent anion-selective channel protein 1	Vdac1	14	14	14	65.4	65.4	65.4	30.755	0	190.65	3936000000	789	14	14	13	14	14	13	14	14	14	14	13	14	14	14	13	14	14	13	14	14	14	14	13	14	28.1652	28.2472	28.295	28.3935	28.3724	28.4816	28.1796	28.3135
	1.26074	-0.224896	Q60972;A2AFI9;A2AFJ1;Q60973;F6ZLC6	Q60972;A2AFI9;A2AFJ1;Q60973	Histone-binding protein RBBP4;Histone-binding protein RBBP7	Rbbp4;Rbbp7	4	4	4	20	20	20	47.655	0	9.4184	62626000	26	3	3	3	3	4	3	3	4	4	4	4	3	3	3	3	3	4	3	3	4	4	4	4	3	22.6712	22.599	22.407	22.8162	22.8079	22.7278	22.4333	22.6876
	0.106475	-0.0805289	Q61036-2;Q61036;A3KGC5;A3KGC3;A3KGC4;A3KGC2	Q61036-2;Q61036;A3KGC5	Serine/threonine-protein kinase PAK 3	Pak3	6	3	2	16.4	8.1	6.1	60.78	0	48.994	38949000	17	3	3	3	1	3	2	3	3	3	3	3	3	2	2	2	1	2	2	2	2	2	2	2	2	21.6599	21.4186	22.2693	21.6746	22.0245	21.8903	21.6253	21.6732
	0.461421	0.148269	Q61081;A0A1L1STC0	Q61081	Hsp90 co-chaperone Cdc37;Hsp90 co-chaperone Cdc37, N-terminally processed	Cdc37	3	3	3	12.9	12.9	12.9	44.593	0	45.559	175320000	70	3	3	3	3	3	3	3	3	3	3	3	3	3	3	3	3	3	3	3	3	3	3	3	3	24.3169	24.172	24.0177	24.2229	23.8508	23.9881	24.0227	24.055
	0.645432	0.268944	Q61166	Q61166	Microtubule-associated protein RP/EB family member 1	Mapre1	4	3	3	18.3	14.9	14.9	30.016	0	9.2123	68849000	11	2	2	2	2	2	2	2	2	2	3	2	2	2	2	2	2	2	2	2	2	2	3	2	2	23.0351	22.666	23.0674	22.9223	22.4696	22.5698	23.0193	22.873
	0.784366	0.106923	Q61171;D3Z4A4	Q61171;D3Z4A4	Peroxiredoxin-2	Prdx2	10	10	10	64.1	64.1	64.1	21.778	0	147.64	2418000000	289	10	9	8	9	9	8	8	9	8	9	8	9	10	9	8	9	9	8	8	9	8	9	8	9	27.8197	27.8425	27.9495	27.8606	27.7144	27.7159	27.8597	27.8979
	1.31774	0.210082	Q61206;A0A1L1SVK0;A0A1L1SQ76;A0A1L1SRD0;A0A1L1SSQ5;A0A1L1SQV7	Q61206;A0A1L1SVK0;A0A1L1SQ76;A0A1L1SRD0	Platelet-activating factor acetylhydrolase IB subunit beta	Pafah1b2	6	6	6	57.6	57.6	57.6	25.581	0	227.19	774210000	194	6	6	6	6	6	5	5	6	6	6	6	6	6	6	6	6	6	5	5	6	6	6	6	6	26.3212	26.3723	26.4144	26.1973	26.2562	26.0242	26.1566	26.4629
	1.30936	0.089962	Q61301-2;Q61301-3;E0CXB9;Q61301;Q8BS72;A0A0N4SUZ7	Q61301-2;Q61301-3;E0CXB9;Q61301	Catenin alpha-2	Ctnna2	18	18	14	27.5	27.5	23.2	100.42	0	170.84	531360000	136	14	12	15	14	14	14	15	12	12	14	16	14	11	10	13	12	13	11	11	11	10	11	13	11	25.6781	25.6752	25.6317	25.541	25.6286	25.5455	25.6409	25.7996
	1.50626	-0.203934	Q61361;A0A0A6YW95	Q61361	Brevican core protein	Bcan	18	18	18	33	33	33	95.814	0	150.47	1057700000	279	18	18	17	18	18	15	15	17	17	18	16	16	18	18	17	18	18	15	15	17	17	18	16	16	26.5029	26.4242	26.563	26.7722	26.7204	26.6094	26.6344	26.5262
	0.627076	0.216496	Q61411;Q61411-2;A0A0G2JGP4;Q9D091;P08556;C0H5X4;A0A0G2JE25;A0A0G2JGM2;B2KGV5;E9Q8V2;E9PVD5;A0A0N4SVY1	Q61411;Q61411-2;A0A0G2JGP4;Q9D091;P08556;C0H5X4;A0A0G2JE25	GTPase HRas;GTPase HRas, N-terminally processed;GTPase NRas	Hras;Nras	9	9	4	66.7	66.7	25.4	21.298	0	99.079	280500000	54	8	9	8	9	8	6	6	7	7	7	8	8	4	4	4	4	4	4	4	4	4	3	4	4	25.085	24.6378	24.6252	24.6295	24.5631	24.5058	24.8714	24.6846
	0.0788987	-0.0296561	Q61425	Q61425	Hydroxyacyl-coenzyme A dehydrogenase, mitochondrial	Hadh	5	5	5	29.6	29.6	29.6	34.463	0	34.769	143900000	35	4	4	4	3	3	5	4	4	4	4	4	3	4	4	4	3	3	5	4	4	4	4	4	3	23.594	23.536	23.8374	23.6982	23.8434	23.5148	23.9615	23.9647
	0.658106	0.19222	Q61553;A0A0G2JDU7;F7BDR1	Q61553;A0A0G2JDU7	Fascin	Fscn1	12	12	12	37.1	37.1	37.1	54.507	0	175.7	809200000	222	11	11	10	11	10	8	12	11	11	12	10	10	11	11	10	11	10	8	12	11	11	12	10	10	26.0969	26.3285	26.3344	26.1399	25.85	26.1932	26.1438	26.2144
	0.165842	0.0194085	Q61598;Q61598-2;A0A1Y7VL99;A0A1Y7VLG4	Q61598;Q61598-2;A0A1Y7VL99	Rab GDP dissociation inhibitor beta	Gdi2	27	27	21	67.4	67.4	52.4	50.537	0	323.31	2657400000	584	24	25	24	24	25	22	21	24	23	21	25	25	19	19	18	18	20	16	15	18	17	15	19	19	27.9471	28.0443	28.0892	28.0161	27.9807	28.0255	27.9738	28.091
	1.61873	-0.184594	Q61644	Q61644	Protein kinase C and casein kinase substrate in neurons protein 1	Pacsin1	16	16	16	47.4	47.4	47.4	50.575	0	259.79	2152200000	443	16	15	14	15	15	15	15	13	15	14	15	15	16	15	14	15	15	15	15	13	15	14	15	15	27.6698	27.4992	27.5809	27.7336	27.7879	27.7822	27.4615	27.6154
	0.829962	-0.274745	Q8BTS0;Q61656;S4R1I6;B1ARB9;B1ARC0;S4R1E3	Q8BTS0;Q61656;S4R1I6	Probable ATP-dependent RNA helicase DDX5	Ddx5	12	12	9	23.1	23.1	17.4	69.265	0	43.164	303070000	106	9	10	8	9	8	9	10	10	10	10	11	9	7	7	6	6	6	6	7	7	7	8	8	7	24.6264	25.0631	24.7486	25.2379	25.0662	24.9582	24.9935	24.792
	0.716331	0.164383	Q61699-2;Q61699;E9Q0U7;D3Z3I9;A0A0J9YTZ7;D3Z027	Q61699-2;Q61699;E9Q0U7	Heat shock protein 105 kDa	Hsph1	19	18	18	35.6	33.9	33.9	91.696	0	140.47	523370000	163	15	12	14	13	13	10	13	14	15	14	14	14	15	12	14	13	13	10	13	14	15	14	14	14	25.5275	25.8699	25.7763	25.6047	25.5238	25.552	25.5494	25.5408
	0.192678	-0.0425453	Q61753;F6ZSB7	Q61753	D-3-phosphoglycerate dehydrogenase	Phgdh	11	11	11	33.6	33.6	33.6	56.585	0	122.05	808640000	186	10	11	11	11	10	10	10	11	10	11	10	11	10	11	11	11	10	10	10	11	10	11	10	11	26.2571	26.2532	26.4117	26.2197	26.3905	26.4396	26.1299	26.3377
	0.858967	-0.282132	Q61792;A2A6H0;A2A6G6;A2A6G7;A2A6G8;A2A6G9;A2A6G0;A2A6G4;A2A6H1;A2A6G5;E9Q0N6	Q61792;A2A6H0;A2A6G6;A2A6G7;A2A6G8;A2A6G9	LIM and SH3 domain protein 1	Lasp1	4	4	4	26.6	26.6	26.6	29.994	0	53.213	254790000	26	3	3	3	4	3	3	3	3	3	3	4	3	3	3	3	4	3	3	3	3	3	3	4	3	24.6677	24.442	24.4522	24.5359	24.9534	24.9189	24.4167	24.4922
	0.329051	0.107742	Q62048;D3Z375;Q62048-2	Q62048;D3Z375	Astrocytic phosphoprotein PEA-15	Pea15;Pea15a	7	7	7	62.3	62.3	62.3	15.054	0	206.01	944720000	216	7	7	7	6	7	6	6	6	7	6	5	7	7	7	7	6	7	6	6	6	7	6	5	7	26.5157	26.7448	26.4735	26.4506	26.6614	26.2988	26.36	26.678
	0.20442	-0.101043	Q62093	Q62093	Serine/arginine-rich splicing factor 2	Srsf2	3	3	3	18.6	18.6	18.6	25.476	0	42.177	105390000	70	3	2	3	3	3	3	2	3	2	3	2	3	3	2	3	3	3	3	2	3	2	3	2	3	23.2357	23.5187	23.2656	23.48	23.7113	23.1317	23.2842	23.2763
	3.07242	-0.343974	Q62108-3;Q62108;Q62108-2;B1AR31;E9PXG2;E9Q3Z8;F6TPQ6;G3UZL5;J3KMS4	Q62108-3;Q62108;Q62108-2	Disks large homolog 4	Dlg4	17	17	16	33	33	29.5	80.101	0	108.41	660320000	183	14	12	13	14	12	13	14	12	12	15	14	13	13	11	12	13	11	12	13	11	11	14	13	12	25.8175	25.8131	25.892	26.1384	26.2365	26.1796	25.8908	26.0091
	0.216459	-0.0857512	Q62167;P16381;Q62095	Q62167;P16381;Q62095	ATP-dependent RNA helicase DDX3X;Putative ATP-dependent RNA helicase Pl10;ATP-dependent RNA helicase DDX3Y	Ddx3x;D1Pas1;Ddx3y	11	10	10	23.9	22.2	22.2	73.101	0	46.211	153550000	35	7	6	7	7	9	7	6	9	6	8	8	7	7	6	7	7	9	7	6	9	6	8	8	7	23.8073	23.9402	23.9956	23.7512	24.0005	24.2487	23.7541	24.0266
	0.11617	-0.0112019	Q62261;A0A0A0MQG2;Q62261-2;D3YWH8	Q62261;A0A0A0MQG2;Q62261-2	Spectrin beta chain, non-erythrocytic 1	Sptbn1	121	121	111	63.5	63.5	59.3	274.22	0	323.31	13308000000	3114	108	108	111	106	104	103	109	109	108	107	107	107	101	98	101	96	96	94	100	99	98	99	98	98	30.3023	30.3343	30.3669	30.3687	30.3815	30.2868	30.3611	30.3129
	1.23261	0.328215	Q62277;F6VR28	Q62277;F6VR28	Synaptophysin	Syp	6	6	6	26.4	26.4	26.4	34.024	0	69.854	1850700000	252	6	5	5	5	5	5	5	5	5	5	5	5	6	5	5	5	5	5	5	5	5	5	5	5	27.8946	27.568	27.6659	27.4525	27.2231	27.4683	27.6642	27.301
	0.606421	-0.228486	Q62318;Q62318-2	Q62318;Q62318-2	Transcription intermediary factor 1-beta	Trim28	7	7	7	15.3	15.3	15.3	88.846	0	18.884	58730000	9	4	4	3	3	2	3	4	3	3	6	3	3	4	4	3	3	2	3	4	3	3	6	3	3	22.3033	22.3386	22.7373	22.5058	22.8296	22.7292	22.1526	22.6798
	0.196615	0.0922349	Q62348	Q62348	Translin	Tsn	2	2	2	14	14	14	26.201	0	5.6734	47882000	3	1	1	1	2	1	1	2	1	2	1	1	2	1	1	1	2	1	1	2	1	2	1	1	2	21.4503	21.7988	22.0035	21.76	21.5003	21.7155	23.1687	23.5497
	0.300436	-0.160801	Q62418-3;Q62418-2;Q62418	Q62418-3;Q62418-2;Q62418	Drebrin-like protein	Dbnl	6	6	6	24.5	24.5	24.5	48.341	0	199.52	210790000	81	6	4	5	5	6	4	5	5	5	6	6	5	6	4	5	5	6	4	5	5	5	6	6	5	24.5739	24.0459	24.1777	24.3547	24.7125	24.2127	24.381	24.3534
	0.533468	0.246841	Q62419	Q62419	Endophilin-A2	Sh3gl1	10	5	5	37.8	26.6	26.6	41.518	0	39.551	72639000	20	2	2	4	4	4	2	2	3	1	4	4	4	2	2	4	4	4	2	2	3	1	4	4	4	23.2413	22.7026	22.6839	22.7309	22.7079	22.4485	22.7689	22.5523
	0.168266	0.0600243	Q62425;A0A0N4SVQ1	Q62425;A0A0N4SVQ1	Cytochrome c oxidase subunit NDUFA4	Ndufa4	5	5	5	76.8	76.8	76.8	9.3267	0	35.97	901800000	194	4	4	4	4	4	4	4	4	5	4	5	5	4	4	4	4	4	4	4	4	5	4	5	5	26.8164	26.6668	26.4003	26.4652	26.6645	26.5738	26.2736	26.4829
	0.332606	-0.203608	Q62426	Q62426	Cystatin-B	Cstb	2	2	2	45.9	45.9	45.9	11.045	0	12.309	303580000	31	2	2	2	2	2	1	1	1	1	2	2	2	2	2	2	2	2	1	1	1	1	2	2	2	24.7467	24.6649	24.8167	24.505	25.3648	24.9693	25.314	24.9542
	0.932032	-0.162127	Q62433;E9Q514;E9Q5I8;E9Q3F9;E9PVF3;E9Q0J8;E9PZC7;E9Q7G8;E9Q147;E9Q7V2;F6VLR8	Q62433;E9Q514	Protein NDRG1	Ndrg1	8	8	8	38.3	38.3	38.3	43.008	0	66.145	307070000	101	6	7	7	7	7	5	6	7	7	6	7	7	6	7	7	7	7	5	6	7	7	6	7	7	24.6701	24.6878	24.9051	24.8589	24.9602	24.9303	24.9042	24.9476
	0.64829	0.223661	Q62443	Q62443	Neuronal pentraxin-1	Nptx1	7	7	7	19.9	19.9	19.9	47.117	0	122.59	140410000	54	7	6	5	4	4	4	6	6	5	7	6	5	7	6	5	4	4	4	6	6	5	7	6	5	23.8502	24.0071	24.0258	23.4886	23.993	23.7306	23.6842	23.8474
	0.231058	-0.114532	Q62465	Q62465	Synaptic vesicle membrane protein VAT-1 homolog	Vat1	5	5	5	19	19	19	43.096	0	21.856	109180000	35	2	3	4	2	2	2	3	5	3	5	4	4	2	3	4	2	2	2	3	5	3	5	4	4	22.9561	23.3376	23.2541	23.4481	23.4584	22.9849	23.3171	23.407
	1.16156	0.127813	Q63810-2;Q63810;Q63811	Q63810-2;Q63810	Calcineurin subunit B type 1	Ppp3r1	11	11	11	70.6	70.6	70.6	18.208	0	110.55	867060000	264	11	11	11	10	9	10	11	8	9	9	10	10	11	11	11	10	9	10	11	8	9	9	10	10	26.3131	26.4595	26.3596	26.2779	26.2783	26.1925	26.1297	26.1785
	0.0294302	0.0119406	Q640R3	Q640R3	Hepatocyte cell adhesion molecule	Hepacam	6	6	6	23.9	23.9	23.9	46.366	0	53.637	267780000	73	6	6	6	4	6	5	6	6	5	6	6	6	6	6	6	4	6	5	6	6	5	6	6	6	24.7429	24.4889	24.8626	24.5814	24.8444	24.6328	24.7378	24.6025
	0.370684	-0.0745138	Q64133	Q64133	Amine oxidase [flavin-containing] A	Maoa	6	6	6	16.3	16.3	16.3	59.601	0	45.588	116260000	58	5	5	4	5	5	4	4	5	5	6	6	6	5	5	4	5	5	4	4	5	5	6	6	6	23.1712	23.3279	23.37	23.3461	23.2731	23.4733	23.8126	23.9256
	0.711926	0.16283	Q641P0;Q641P0-2	Q641P0;Q641P0-2	Actin-related protein 3B	Actr3b	11	7	7	38	27	27	47.579	0	45.079	371200000	74	7	6	6	6	6	5	7	6	5	7	6	5	7	6	6	6	6	5	7	6	5	7	6	5	25.2503	25.1481	25.4256	25.0954	25.2333	25.0067	25.165	25.3416
	0.675196	0.0753142	Q64332;Q64332-2	Q64332;Q64332-2	Synapsin-2	Syn2	25	23	22	60.1	55.8	54.4	63.372	0	323.31	9980100000	1181	23	22	23	23	22	22	22	23	23	23	22	23	22	21	22	22	21	21	21	22	22	22	21	22	30.053	29.9768	29.9259	29.9044	29.8528	29.9725	29.9156	29.8151
	2.22925	0.0957718	Q64433	Q64433	10 kDa heat shock protein, mitochondrial	Hspe1	7	7	7	60.8	60.8	60.8	10.963	0	44.01	996040000	255	7	7	7	7	7	7	7	7	7	7	7	7	7	7	7	7	7	7	7	7	7	7	7	7	26.5825	26.552	26.5836	26.4486	26.4851	26.4972	26.5342	26.4085
	0.063646	-0.0206369	Q64514-2;Q64514;A0A087WRC0;Q05DJ9;A0A087WP19;A0A087WQR6	Q64514-2;Q64514;A0A087WRC0	Tripeptidyl-peptidase 2	Tpp2	12	12	12	12.6	12.6	12.6	138.46	0	25.463	138900000	11	9	10	7	12	9	8	7	9	9	9	8	9	9	10	7	12	9	8	7	9	9	9	8	9	23.5784	23.9274	23.8548	23.8679	23.7386	23.8161	23.4211	23.2237
	0.624658	-0.182935	Q64727	Q64727	Vinculin	Vcl	11	11	11	16.8	16.8	16.8	116.72	0	35.704	161230000	44	9	7	7	7	8	10	7	7	7	9	8	9	9	7	7	7	8	10	7	7	7	9	8	9	23.8908	24.1169	23.9947	24.0553	24.0839	24.412	23.7876	24.0016
	1.43001	0.0952009	Q68FG2	Q68FG2		Sptbn2	78	69	69	47.1	42.9	42.9	270.92	0	323.31	3869200000	1041	62	61	65	61	58	59	57	64	61	60	58	61	62	61	65	61	58	59	57	64	61	60	58	61	28.7219	28.69	28.6428	28.5492	28.6178	28.6022	28.5318	28.5867
	0.341782	0.502377	Q68FM6	Q68FM6	Protein phosphatase 1 regulatory subunit 29	Elfn2	1	1	1	2.1	2.1	2.1	90.028	0	8.6978	21256000	7	1	1	1	1	1	1	1	1	1	1	1	1	1	1	1	1	1	1	1	1	1	1	1	1	21.1124	21.7515	21.4643	22.0414	20.0767	20.703	20.5804	20.9006
	0.101916	-0.0674864	Q69ZF3	Q69ZF3	Non-lysosomal glucosylceramidase	Gba2	2	2	2	2.6	2.6	2.6	103.29	0	4.046	27547000	5	2	1	1	1	2	1	1	2	1	2	1	1	2	1	1	1	2	1	1	2	1	2	1	1	21.2312	21.4856	21.968	21.4308	21.7486	21.7078	21.1646	21.9048
	0.896787	0.156072	Q6DFY2;G5E8G3	Q6DFY2;G5E8G3		Opcml	6	6	5	25.8	25.8	22.8	37.156	0	169.41	449140000	117	5	5	6	5	5	5	5	5	5	5	6	6	4	4	5	4	4	4	4	4	4	4	5	5	25.6132	25.5402	25.4612	25.478	25.25	25.4183	25.3035	25.0196
	1.03755	-0.380289	Q6GQV0-2;Q6GQV0	Q6GQV0-2;Q6GQV0	Uncharacterized protein C16orf59 homolog		1	1	1	7.2	7.2	7.2	27.701	0.0069565	2.4778	58199000	10	1	1	1	1	1	1	1	1	1	1	1	1	1	1	1	1	1	1	1	1	1	1	1	1	22.3061	22.5497	22.1999	23.0043	22.5612	22.6311	22.3814	22.2592
	1.2601	-0.137101	Q6GT24;O08709;A0A0A6YXQ7	Q6GT24;O08709	Peroxiredoxin-6	Prdx6	16	16	2	79.5	79.5	17	24.826	0	323.31	3253900000	617	13	15	15	15	14	16	14	14	14	15	13	15	2	2	2	2	2	2	2	2	2	2	2	2	28.2737	28.3593	28.2036	28.3801	28.4618	28.406	28.3076	28.2406
	0.0722064	0.0339444	Q6IRU2	Q6IRU2	Tropomyosin alpha-4 chain	Tpm4	3	3	3	16.5	16.5	16.5	28.467	0	12.662	31667000	2	1	2	2	1	2	2	3	2	3	2	3	3	1	2	2	1	2	2	3	2	3	2	3	3	21.3249	21.8171	21.7595	21.5327	21.7084	21.5586	21.6794	21.6005
	0.314714	-0.0736408	Q6IRU5;Q6IRU5-2;F7BHJ0;Q6IRU5-3	Q6IRU5;Q6IRU5-2	Clathrin light chain B	Cltb	7	7	7	30.1	30.1	30.1	25.171	0	23.457	540130000	77	5	7	6	6	7	5	7	6	7	7	7	5	5	7	6	6	7	5	7	6	7	7	7	5	25.793	25.5348	25.7958	25.7016	25.8067	25.8361	25.701	25.605
	0.839754	0.478723	Q6NZL0	Q6NZL0	Protein SOGA3	Soga3	4	4	4	4.3	4.3	4.3	103.48	0	7.5624	31785000	2	3	4	3	2	4	3	3	4	3	4	4	2	3	4	3	2	4	3	3	4	3	4	4	2	21.7198	21.526	22.2985	21.2481	21.2367	21.6234	21.959	21.3027
	0.373202	0.161779	Q9CWU3;Q6P1F6;G3UXS9;Q8BG02	Q9CWU3;Q6P1F6	Serine/threonine-protein phosphatase 2A 55 kDa regulatory subunit B;Serine/threonine-protein phosphatase 2A 55 kDa regulatory subunit B alpha isoform	Ppp2r2a	10	10	6	43.9	43.9	29.7	42.605	0	71.167	388830000	74	8	7	9	8	7	5	5	8	7	7	6	7	5	4	5	6	5	3	3	5	4	5	4	4	25.1346	25.2401	25.5109	25.3274	25.2183	24.8546	25.0721	25.301
	0.518455	-0.0445226	Q6P1J1;P97427;Q71H75;A0A0J9YTX5;A0A0J9YUZ1	Q6P1J1;P97427	Dihydropyrimidinase-related protein 1	Crmp1	24	22	20	61.8	57.6	54.2	74.22	0	323.31	5141700000	536	19	21	20	17	20	20	20	21	19	18	18	19	18	19	18	16	19	19	18	19	18	17	17	18	28.9557	28.9435	28.9901	29.013	29.0654	28.9444	28.9858	28.9678
	0.179479	0.048322	Q6P5F9;F6YA11;A2AKT6	Q6P5F9	Exportin-1	Xpo1	7	7	7	11.4	11.4	11.4	123.09	0	36.23	132780000	17	5	5	5	5	5	4	5	7	6	5	7	6	5	5	5	5	5	4	5	7	6	5	7	6	23.876	23.6994	23.6892	23.7782	23.7995	23.542	23.7207	23.5049
	1.03462	-0.154535	Q6P9K8-2;Q6P9K8;Q6P9K8-3;Q6P9K8-4;F6R2B3;Q8VHK1	Q6P9K8-2;Q6P9K8;Q6P9K8-3	Caskin-1	Caskin1	10	10	10	12.7	12.7	12.7	142.69	0	33.697	192430000	37	8	9	7	7	9	8	7	8	10	10	6	8	8	9	7	7	9	8	7	8	10	10	6	8	24.1615	24.107	24.2579	24.351	24.2268	24.4122	23.796	24.3155
	0.136354	-0.0288143	Q6PB66	Q6PB66	Leucine-rich PPR motif-containing protein, mitochondrial	Lrpprc	13	13	13	14.4	14.4	14.4	156.61	0	55.929	157510000	60	8	8	12	8	10	6	7	8	9	9	9	6	8	8	12	8	10	6	7	8	9	9	9	6	23.9631	23.8225	23.9389	23.8164	24.0383	23.9563	24.0712	24.0295
	0.0859338	-0.0697479	Q6PCP5-2;F7B1A4;F6VAL0	Q6PCP5-2;F7B1A4;F6VAL0	Mitochondrial fission factor	Mff	3	1	1	28	11.7	11.7	27.222	0	12.097	47352000	11	1	1	1	1	1	1	1	1	1	1	1	1	1	1	1	1	1	1	1	1	1	1	1	1	21.8152	22.5826	21.8286	22.416	22.0362	21.9835	22.183	22.0147
	0.611289	-0.46744	Q6PDL0;A0A1D5RMC1;A0A1D5RM94	Q6PDL0;A0A1D5RMC1;A0A1D5RM94	Cytoplasmic dynein 1 light intermediate chain 2	Dync1li2	3	3	3	10.4	10.4	10.4	54.218	0	12.023	94827000	33	2	2	2	2	1	1	1	2	2	2	3	2	2	2	2	2	1	1	1	2	2	2	3	2	22.6825	23.2253	22.6748	22.9153	23.8892	23.1804	23.0359	23.5242
	0.197561	-0.0762978	Q6PER3	Q6PER3	Microtubule-associated protein RP/EB family member 3	Mapre3	8	8	2	32.7	32.7	9.6	31.966	0	43.44	357110000	78	5	7	5	7	5	6	8	8	4	7	6	7	1	2	0	2	1	1	2	2	1	1	1	1	25.1643	24.8621	25.3567	25.2306	25.2497	25.1317	25.1228	25.0434
	0.115732	-0.0852852	Q6PF96;Q921G7	Q6PF96;Q921G7	Electron transfer flavoprotein-ubiquinone oxidoreductase, mitochondrial	Etfdh	8	8	8	20.3	20.3	20.3	61.16	0	22.695	120310000	19	7	5	4	5	6	6	4	6	5	4	5	6	7	5	4	5	6	6	4	6	5	4	5	6	23.8632	23.2807	23.0231	23.4345	23.3246	23.6636	23.9638	23.6671
	2.17028	0.121406	Q6PGF7	Q6PGF7	Exocyst complex component 8	Exoc8	5	5	5	12.7	12.7	12.7	81.034	0	13.383	47976000	3	2	2	4	3	4	1	2	4	4	4	2	4	2	2	4	3	4	1	2	4	4	4	2	4	22.3893	22.3276	22.3262	22.207	22.2265	22.2454	22.2854	22.0245
	0.239856	0.133729	Q6PHN9;S4R1W7	Q6PHN9	Ras-related protein Rab-35	Rab35	4	4	4	26.9	26.9	26.9	23.025	0	43.834	118780000	32	4	3	3	3	3	3	3	3	3	4	4	4	4	3	3	3	3	3	3	3	3	4	4	4	23.9315	23.2229	23.645	23.4094	23.3705	23.6183	23.7654	23.6404
	0.782892	0.33029	Q6PHU5;Q6PHU5-2	Q6PHU5;Q6PHU5-2	Sortilin	Sort1	1	1	1	3.8	3.8	3.8	91.199	0	4.872	25430000	8	1	1	1	1	1	1	1	1	1	1	1	1	1	1	1	1	1	1	1	1	1	1	1	1	21.3886	21.6023	21.2486	21.0887	21.3661	20.7939	20.8943	21.8879
	0.367174	-0.0312284	Q6PIE5;D3YYN7	Q6PIE5;D3YYN7	Sodium/potassium-transporting ATPase subunit alpha-2	Atp1a2	42	25	25	44.4	24.6	24.6	112.22	0	323.31	3515500000	695	22	21	19	21	20	21	20	20	22	22	22	22	22	21	19	21	20	21	20	20	22	22	22	22	28.3088	28.3073	28.2985	28.4062	28.3099	28.2923	28.6042	28.5709
	0.0403727	-0.0204722	Q6R891;Q6R891-2	Q6R891	Neurabin-2	Ppp1r9b	11	11	11	24.1	24.1	24.1	89.519	0	27.937	230540000	63	6	4	4	6	8	8	6	5	9	6	8	6	6	4	4	6	8	8	6	5	9	6	8	6	24.5246	24.5579	24.5218	24.7852	24.6619	24.2185	24.3639	24.4773
	0.90947	-0.195141	Q6ZPE2;Q6ZPE2-2;D6RG52;F7AWK3;F6S251;H3BKD9	Q6ZPE2;Q6ZPE2-2	Myotubularin-related protein 5	Sbf1	16	16	16	13.4	13.4	13.4	208.69	0	60.492	225230000	55	12	10	13	9	11	12	8	9	12	9	11	11	12	10	13	9	11	12	8	9	12	9	11	11	24.4644	24.3815	24.5747	24.5079	24.7129	24.7852	24.32	24.3299
	0.3168	-0.160206	Q6ZPJ3	Q6ZPJ3	E2/E3 hybrid ubiquitin-protein ligase UBE2O	Ube2o	9	9	9	12	12	12	140.83	0	27.904	173570000	32	5	6	4	7	7	5	5	5	6	7	5	6	5	6	4	7	7	5	5	5	6	7	5	6	23.8128	24.0791	24.2885	23.9115	24.3882	24.3614	24.0362	24.0858
	0.490694	-0.313251	Q6ZPU9;H3BIY2;Q6ZPU9-2;E0CXJ9;E0CXN7;Q6ZPU9-3	Q6ZPU9;H3BIY2;Q6ZPU9-2	KIF1-binding protein	Kbp;2510003E04Rik	3	3	3	10.4	10.4	10.4	71.051	0	5.6106	59556000	6	3	3	2	3	3	2	2	3	3	2	3	2	3	3	2	3	3	2	2	3	3	2	3	2	21.9187	22.8016	22.1654	22.7359	22.4334	22.6562	22.3605	22.7978
	0.1797	-0.0150795	Q6ZQ38;D3YWC5;Q6ZQ73	Q6ZQ38	Cullin-associated NEDD8-dissociated protein 1	Cand1	38	38	38	47.1	47.1	47.1	136.33	0	319.5	1682800000	528	34	31	34	33	32	32	30	32	32	35	33	33	34	31	34	33	32	32	30	32	32	35	33	33	27.33	27.3131	27.2968	27.2744	27.3798	27.3309	27.2503	27.4032
	1.24666	0.13905	Q6ZWN5;F7CJS8;D3YWH9;Q9CXW7;D3Z673;D3YUV6	Q6ZWN5;F7CJS8;D3YWH9;Q9CXW7	40S ribosomal protein S9	Rps9	7	7	7	31.4	31.4	31.4	22.591	0	14.729	183740000	48	6	6	5	6	7	7	6	7	6	6	6	6	6	6	5	6	7	7	6	7	6	6	6	6	24.3462	24.2667	24.3754	24.1444	24.1545	24.2723	23.9816	24.2494
	0.466075	0.251387	Q6ZWZ4;P47964	Q6ZWZ4;P47964	60S ribosomal protein L36	Rpl36	3	3	3	30.5	30.5	30.5	12.254	0	8.0868	94975000	40	2	2	3	2	2	1	3	3	3	1	2	2	2	2	3	2	2	1	3	3	3	1	2	2	23.1694	23.5163	23.4599	23.1588	23.4742	22.7585	23.3438	23.1857
	0.0703547	0.0555573	Q6ZWZ7;Q9CPR4;B2RY53	Q6ZWZ7;Q9CPR4	60S ribosomal protein L17	Rpl17	6	6	6	37.5	37.5	37.5	21.397	0	18.61	146130000	50	6	6	6	5	4	4	5	4	4	6	5	4	6	6	6	5	4	4	5	4	4	6	5	4	23.738	24.3131	23.4977	24.0341	23.5731	23.7749	24.0267	23.868
	0.142018	0.0529499	Q71M36-3;Q71M36-2	Q71M36-3;Q71M36-2			1	1	1	6.6	6.6	6.6	49.027	0	17.129	131590000	34	1	1	1	1	1	1	1	1	1	1	1	1	1	1	1	1	1	1	1	1	1	1	1	1	23.7383	23.5636	23.8447	23.4716	23.6592	23.857	23.4306	23.7715
	0.558544	-0.077287	Q76MZ3;G3UWL2;H3BLQ0;Q3TTF6;H3BKU1;G3UWS4;Q7TNP2;H3BIV7;H3BLE7;G3UXQ1;H3BK50;H3BJ83	Q76MZ3	Serine/threonine-protein phosphatase 2A 65 kDa regulatory subunit A alpha isoform	Ppp2r1a	24	24	24	53.1	53.1	53.1	65.322	0	323.31	4195200000	650	23	23	22	23	23	21	22	23	21	22	23	22	23	23	22	23	23	21	22	23	21	22	23	22	28.631	28.726	28.5309	28.7515	28.7005	28.6677	28.5783	28.6222
	0.343096	0.206825	Q78J03	Q78J03	Methionine-R-sulfoxide reductase B2, mitochondrial	Msrb2	2	2	2	10.3	10.3	10.3	19.157	0.0069294	2.4522	10639000	1	1	1	2	1	1	1	1	1	1	2	1	1	1	1	2	1	1	1	1	1	1	2	1	1	19.8822	20.6843	20.3079	19.9418	20.0536	20.2584	19.9346	20.0374
	0.285574	0.154262	Q78YZ6-3;Q78YZ6-2;Q78YZ6	Q78YZ6-3;Q78YZ6-2;Q78YZ6	Short coiled-coil protein	Scoc	1	1	1	22.2	22.2	22.2	9.2833	0	27.417	71189000	12	1	1	1	1	1	1	1	1	1	1	1	1	1	1	1	1	1	1	1	1	1	1	1	1	22.9086	23.1782	22.5322	22.496	22.8355	22.8246	22.5601	22.2814
	0.742831	0.143248	Q791T5-2;Q791T5;D3YXC2	Q791T5-2;Q791T5;D3YXC2	Mitochondrial carrier homolog 1	Mtch1	7	7	7	29	29	29	39.94	0	19.054	109900000	32	7	6	7	6	6	3	5	7	7	5	4	7	7	6	7	6	6	3	5	7	7	5	4	7	23.422	23.3677	23.59	23.2544	23.4324	23.2633	23.4024	23.5192
	0.558475	0.142387	Q791V5;A2AFW6;Q9D050;D6RCZ1	Q791V5;A2AFW6;Q9D050	Mitochondrial carrier homolog 2	Mtch2	9	9	9	44.2	44.2	44.2	33.499	0	102.28	537900000	122	9	9	8	9	9	8	8	9	8	9	9	9	9	9	8	9	9	8	8	9	8	9	9	9	25.8768	25.6121	25.9918	25.6608	25.7013	25.6913	25.5325	25.3948
	0.151687	0.105909	Q792Z1	Q792Z1		Try10	1	1	1	8.1	8.1	8.1	26.221	0.003107	2.6569	209880000	26	1	1	1	1	1	1	1	1	1	1	1	1	1	1	1	1	1	1	1	1	1	1	1	1	24.285	24.8702	24.1409	24.1269	24.2686	24.5829	24.2694	24.4225
	0.811528	0.201402	Q7M6W1;A3QM89	Q7M6W1;A3QM89	Reticulon	Rtn1	4	3	3	19.7	13.5	13.5	23.557	0	23.886	513090000	49	3	3	3	3	3	3	3	3	3	3	3	3	3	3	3	3	3	3	3	3	3	3	3	3	25.5334	25.8241	25.8517	25.439	25.6224	25.5436	25.5287	25.7376
	0.65878	-0.157363	Q7M6Y3-6;Q7M6Y3-5;Q7M6Y3;Q7M6Y3-2;Q7M6Y3-3;Q7M6Y3-4;A0A140LHQ8;A0A1L1SUR7	Q7M6Y3-6;Q7M6Y3-5;Q7M6Y3;Q7M6Y3-2;Q7M6Y3-3;Q7M6Y3-4;A0A140LHQ8	Phosphatidylinositol-binding clathrin assembly protein	Picalm	5	3	3	11.5	8.4	8.4	70.567	0	36.133	124010000	13	3	2	1	2	3	2	1	1	1	2	3	1	3	2	1	2	3	2	1	1	1	2	3	1	23.4874	23.5012	23.3815	23.7368	23.6924	23.413	23.4423	23.4451
	1.01406	-0.332197	Q7M750	Q7M750	Opalin	Opalin	2	2	2	23.1	23.1	23.1	15.833	0	17.142	160630000	27	1	2	1	2	2	1	1	1	2	2	2	2	1	2	1	2	2	1	1	1	2	2	2	2	23.8999	23.6236	23.9445	23.9344	24.3301	24.2002	24.1321	23.916
	2.73271	0.463952	Q7TMB8;Q7TMB8-2;A0A0R4J119;A0A0U1RQ05	Q7TMB8;Q7TMB8-2;A0A0R4J119;A0A0U1RQ05	Cytoplasmic FMR1-interacting protein 1	Cyfip1	22	9	9	22.5	8.5	8.5	145.24	0	25.096	101410000	37	9	8	6	7	5	5	6	5	7	7	7	5	9	8	6	7	5	5	6	5	7	7	7	5	23.4655	23.5708	23.5502	22.9764	23.1644	23.0538	22.8973	23.5531
	0.243132	-0.141118	Q7TMD7	Q7TMD7	Desmoglein-4	Dsg4	1	1	1	1.2	1.2	1.2	114.45	0.0069384	2.4586	110940000	17	1	1	1	1	1	1	1	1	1	1	1	1	1	1	1	1	1	1	1	1	1	1	1	1	23.0978	23.0158	23.4608	23.0044	23.6404	23.353	23.3099	23.4037
	0.566753	-0.210525	Q7TMM9	Q7TMM9	Tubulin beta-2A chain	Tubb2a	31	10	2	78.4	38.2	11.5	49.906	0	323.31	28922000000	3003	9	9	9	10	10	10	9	9	10	9	9	10	2	2	2	2	2	2	2	2	2	1	2	2	30.3067	30.822	30.5137	30.6858	30.897	30.6912	30.6741	30.7811
	0.512926	0.0489992	Q7TNB5	Q7TNB5		Gria1	15	15	1	21.6	21.6	1	101.59	0	62.048	510920000	178	13	12	13	12	13	10	15	12	13	12	13	13	1	1	1	1	1	1	1	1	1	1	1	1	25.6936	25.7431	25.7504	25.7181	25.7177	25.6043	25.739	25.5991
	0.0491858	0.0122102	Q7TQD2	Q7TQD2	Tubulin polymerization-promoting protein	Tppp	7	7	7	36.7	36.7	36.7	23.574	0	221.37	2095500000	412	7	6	7	7	7	5	6	7	6	7	6	7	7	6	7	7	7	5	6	7	6	7	6	7	27.6119	27.4438	27.521	27.6531	27.4379	27.4491	27.6632	27.6559
	0.221608	0.0563272	Q7TQI3;D3YWF6;D3Z7K0	Q7TQI3;D3YWF6	Ubiquitin thioesterase OTUB1	Otub1	12	12	12	64.6	64.6	64.6	31.27	0	160.31	976230000	340	11	12	11	10	11	10	11	12	12	11	11	12	11	12	11	10	11	10	11	12	12	11	11	12	26.5268	26.7085	26.7725	26.4863	26.711	26.6415	26.5433	26.4855
	1.00255	-0.18616	Q7TSJ2;A0A140LIT9;D3Z6W1;Q7TSJ2-2;Q7TSJ2-3	Q7TSJ2;A0A140LIT9;D3Z6W1;Q7TSJ2-2	Microtubule-associated protein 6	Map6	32	32	32	50.4	50.4	50.4	96.449	0	320.29	2030800000	594	28	27	26	28	30	30	30	29	30	32	30	29	28	27	26	28	30	30	30	29	30	32	30	29	27.5257	27.4193	27.6014	27.5756	27.7148	27.8145	27.5996	27.5086
	2.30933	-0.126931	Q80SW1	Q80SW1	Putative adenosylhomocysteinase 2	Ahcyl1	15	15	8	32.5	32.5	17.9	58.951	0	92.866	1468400000	276	13	12	13	11	13	10	12	14	12	14	13	11	7	7	7	5	7	5	5	7	6	7	6	5	27.1808	27.1182	27.1711	27.2629	27.2857	27.3023	27.1745	27.1821
	0.979499	-0.351205	Q80TB8;D3Z434	Q80TB8	Synaptic vesicle membrane protein VAT-1 homolog-like	Vat1l	7	7	7	23	23	23	45.817	0	48.888	101470000	34	6	5	5	7	6	5	5	7	7	7	7	7	6	5	5	7	6	5	5	7	7	7	7	7	22.795	22.379	22.8434	22.8984	22.9982	23.1744	23.3961	23.3502
	0.0262987	-0.023351	Q80TJ1-2;A0A286YDH6;A0A286YE00;E9Q5C0;A0A0M3HEP6;E9Q835;Q8BYR5-5;F6SH36;Q8BYR5-6;Q8BYR5-7	Q80TJ1-2;A0A286YDH6	Calcium-dependent secretion activator 1	Cadps	33	1	1	33.8	1.3	1.3	154	0	27.325	75622000	26	1	1	1	1	1	1	1	1	1	1	1	1	1	1	1	1	1	1	1	1	1	1	1	1	22.703	23.0676	22.9555	22.9468	23.4051	22.4443	22.97	22.8089
	0.256746	0.0437946	Q80TJ1-4;Q80TJ1;K4DI76;J3QJW3	Q80TJ1-4;Q80TJ1;K4DI76;J3QJW3	Calcium-dependent secretion activator 1	Cadps	34	34	2	35.5	35.5	2.8	152.66	0	323.31	2222200000	499	28	27	31	27	25	28	28	29	30	31	31	29	2	2	2	1	2	2	1	2	2	2	2	1	27.7023	27.7899	27.7677	27.8068	27.7289	27.5928	27.9047	27.8038
	0.145563	0.031285	Q80TL0	Q80TL0	Protein phosphatase 1E	Ppm1e	8	8	8	14	14	14	83.418	0	49.574	400550000	84	7	7	7	8	8	6	8	7	8	6	7	7	7	7	7	8	8	6	8	7	8	6	7	7	25.3114	25.2832	25.4594	25.2293	25.4287	25.3021	25.2825	25.2543
	0.36425	-0.085893	Q80TL4;Q80TL4-2;F6SBE4;S4R1R0;S4R193;S4R202	Q80TL4;Q80TL4-2	Protein KIAA1045	Kiaa1045	11	11	11	41.2	41.2	41.2	45.222	0	91.022	467980000	129	8	9	9	9	8	8	9	9	10	9	10	10	8	9	9	9	8	8	9	9	10	9	10	10	25.4102	25.5363	25.5278	25.4165	25.589	25.7264	25.3532	25.5349
	0.136135	-0.0583897	Q80TZ3-2;Q80TZ3;Q80TZ3-3;B1B0B8;B1B0B7	Q80TZ3-2;Q80TZ3;Q80TZ3-3	Putative tyrosine-protein phosphatase auxilin	Dnajc6	18	18	18	38.8	38.8	38.8	98.52	0	81.525	660380000	109	15	14	15	17	16	11	13	18	13	17	16	15	15	14	15	17	16	11	13	18	13	17	16	15	25.8446	26.2727	25.7706	26.0354	25.9749	26.0529	25.9525	25.9938
	0.204882	-0.183017	Q80U56	Q80U56	Late secretory pathway protein AVL9 homolog	Avl9	4	4	4	13.4	13.4	13.4	72.185	0	22.055	42794000	9	2	3	2	3	3	2	4	2	2	3	3	3	2	3	2	3	3	2	4	2	2	3	3	3	21.9351	21.7653	21.9465	21.3917	22.3212	22.483	22.0936	22.1778
	0.631371	-0.194909	Q80UG2;P70207	Q80UG2	Plexin-A4	Plxna4	15	15	11	12	12	8.7	212.56	0	36.834	164470000	24	9	9	10	9	6	8	8	11	10	9	11	9	7	7	7	5	4	4	6	8	7	7	8	6	23.9156	23.8539	24.2711	24.1734	24.3058	24.1461	23.9539	24.0655
	0.0504428	-0.0185445	Q80UW2	Q80UW2	F-box only protein 2	Fbxo2	7	7	7	34.3	34.3	34.3	33.676	0	28.609	235890000	72	6	6	5	5	5	4	4	6	6	4	6	5	6	6	5	5	5	4	4	6	6	4	6	5	24.4775	24.5451	24.3945	24.4736	24.7043	24.2948	24.3694	24.5375
	0.0811843	-0.0658849	Q80VD1	Q80VD1	Protein FAM98B	Fam98b	4	4	4	12.4	12.4	12.4	45.349	0	8.061	46599000	17	3	2	2	3	3	3	3	3	4	4	3	2	3	2	2	3	3	3	3	3	4	4	3	2	22.0459	21.9763	22.6385	21.8965	22.4656	22.4963	22.1018	22.3082
	0.584184	-0.0971025	Q80VM5;Q5U4C2;E9PWX1;Q9Z218	Q80VM5;Q5U4C2;E9PWX1;Q9Z218	Dipeptidyl aminopeptidase-like protein 6	Dpp6	18	18	17	29.1	29.1	28.1	91.213	0	112.61	811510000	147	16	15	16	15	16	14	14	16	16	14	15	17	15	14	15	14	15	13	13	15	15	13	14	16	26.419	26.3013	26.2766	26.3441	26.5445	26.3996	26.4327	26.2481
	0.174414	-0.108814	Q80VP0-2;Q80VP0	Q80VP0-2;Q80VP0	Tectonin beta-propeller repeat-containing protein 1	Tecpr1	3	3	3	6.7	6.7	6.7	114.03	0	13.93	42429000	7	2	1	1	2	2	2	1	2	2	2	2	1	2	1	1	2	2	2	1	2	2	2	2	1	21.9217	22.0527	22.2791	22.4274	21.7698	22.3827	21.8428	22.2799
	0.157336	0.0435219	Q80VP1;Q80VP1-2;D3Z4V3;D3Z550	Q80VP1;Q80VP1-2	Epsin-1	Epn1	8	8	7	22.3	22.3	20.2	60.211	0	40.322	169270000	63	7	8	7	8	6	3	4	7	5	7	6	6	6	7	6	7	5	2	3	6	4	6	5	5	24.1305	23.9007	24.1044	23.8601	24.1094	24.0354	24.1992	24.0074
	0.507696	-0.291729	Q80WM4	Q80WM4	Hyaluronan and proteoglycan link protein 4	Hapln4	5	5	5	19.2	19.2	19.2	42.808	0	17.932	73130000	12	4	4	4	3	4	3	3	4	4	5	3	4	4	4	4	3	4	3	3	4	4	5	3	4	22.964	22.1296	22.5561	22.9568	22.7078	22.8602	22.5931	22.8133
	0.908379	-0.284682	Q8CAA2;Q80X80;Q8CFV7	Q8CAA2;Q80X80;Q8CFV7	C2 domain-containing protein 2-like	C2cd2l	4	4	4	12.4	12.4	12.4	70.454	0	13.129	48823000	12	3	2	2	3	3	3	1	3	1	3	1	2	3	2	2	3	3	3	1	3	1	3	1	2	21.7487	22.2069	22.0849	22.1981	22.367	22.3294	22.0113	22.204
	0.0583132	-0.0268815	Q80XI4	Q80XI4	Phosphatidylinositol 5-phosphate 4-kinase type-2 beta	Pip4k2b	8	8	5	28.1	28.1	20	47.318	0	85.938	261250000	76	7	7	7	6	7	5	7	6	8	7	8	6	5	5	4	4	5	3	4	4	5	5	5	4	24.7255	24.3199	24.7108	24.4481	24.751	24.6377	24.7883	24.5959
	2.0693	-0.255242	Q80XN0;D3Z2Y8	Q80XN0	D-beta-hydroxybutyrate dehydrogenase, mitochondrial	Bdh1	11	11	11	39.4	39.4	39.4	38.299	0	60.684	377530000	111	9	11	9	7	9	7	9	9	6	6	7	7	9	11	9	7	9	7	9	9	6	6	7	7	24.9635	25.0426	24.9922	25.3496	25.215	25.1995	25.2357	25.4534
	0.0885444	-0.0607459	Q80Y86	Q80Y86	Mitogen-activated protein kinase 15	Mapk15	1	1	1	1.5	1.5	1.5	60.678	0	3.9802	103800000	21	1	1	1	1	1	1	1	1	1	1	1	1	1	1	1	1	1	1	1	1	1	1	1	1	23.3424	23.5617	23.481	23.0539	23.7183	23.7952	23.2475	23.4158
	0.648569	-0.10744	Q80YA9-2;Q80YA9;A2AI78;Q8BMA3	Q80YA9-2;Q80YA9;A2AI78	Connector enhancer of kinase suppressor of ras 2	Cnksr2	11	11	11	20.2	20.2	20.2	111.89	0	27.882	121900000	29	10	8	8	8	8	4	5	5	7	6	6	8	10	8	8	8	8	4	5	5	7	6	6	8	23.5854	23.6321	23.7794	23.8216	23.6795	23.8181	23.4865	23.4294
	0.785441	-0.223544	Q80ZJ1;Q80ZJ1-2;Q8BU31	Q80ZJ1;Q80ZJ1-2;Q8BU31	Ras-related protein Rap-2a;Ras-related protein Rap-2c	Rap2a;Rap2c	6	2	2	37.7	11.5	11.5	20.642	0	14.876	91955000	26	2	2	2	2	2	2	2	2	2	2	2	2	2	2	2	2	2	2	2	2	2	2	2	2	23.3689	23.053	23.111	23.3491	23.5736	23.2809	23.4104	22.9074
	0.444683	-0.0386047	Q810U3;A0A087WPX3;A0A087WNW2;A0A087WR56	Q810U3;A0A087WPX3;A0A087WNW2;A0A087WR56	Neurofascin	Nfasc	25	25	4	28	28	5.2	137.97	0	317.12	1357900000	326	20	18	18	17	20	17	20	19	19	20	19	18	4	4	4	4	4	4	4	3	4	4	4	4	27.0423	26.9789	27.0489	27.0902	27.0935	27.0022	27.0719	27.0917
	0.529995	-0.191165	Q8BFQ8	Q8BFQ8	Parkinson disease 7 domain-containing protein 1	Pddc1	4	4	4	30.5	30.5	30.5	23.277	0	18.116	55136000	28	4	2	3	3	3	2	4	3	2	4	3	3	4	2	3	3	3	2	4	3	2	4	3	3	22.1729	22.6113	22.3188	22.3754	22.6751	22.626	22.5734	22.5557
	0.137889	0.0251408	Q8BFR5;Q8BFR5-2;A0A0U1RNQ6;A0A0U1RPC4	Q8BFR5;Q8BFR5-2	Elongation factor Tu, mitochondrial	Tufm	14	14	14	35.6	35.6	35.6	49.508	0	128.15	775440000	210	12	12	13	10	13	10	11	11	12	12	11	10	12	12	13	10	13	10	11	11	12	12	11	10	26.3029	26.263	26.1181	26.1999	26.2687	26.14	26.236	26.1855
	0.0757231	-0.0157159	Q8BFZ9;A0A1B0GQZ0;A0A1B0GSD8;A0A1B0GT70;A0A1B0GT43;A0A1B0GRQ1;A0A1B0GRG7;E9PUH5;A0A0R4J1G5;Q91X78	Q8BFZ9;A0A1B0GQZ0;A0A1B0GSD8;A0A1B0GT70	Erlin-2	Erlin2	5	5	5	20.9	20.9	20.9	37.872	0	17.689	69317000	8	3	3	2	3	1	2	3	4	1	5	2	2	3	3	2	3	1	2	3	4	1	5	2	2	22.7532	22.7009	22.8755	22.7505	22.8946	22.7316	22.9059	22.341
	0.106679	0.0365804	Q8BG32;G3UYH2;G3UYL8;G3UX15;G3UYI4;G3UZ33;G3UYL3;G3UWW7;G3UXL5;G3UX67;G3UWV7;G3UZ28	Q8BG32	26S proteasome non-ATPase regulatory subunit 11	Psmd11	7	7	7	18.2	18.2	18.2	47.436	0	19.01	102660000	27	6	6	6	5	7	4	4	6	6	6	6	6	6	6	6	5	7	4	4	6	6	6	6	6	23.1902	23.4319	23.544	23.3624	23.4616	23.2323	23.2788	23.4918
	0.169872	0.0904179	Q8BG39;A2RSH4;Q69ZS6	Q8BG39	Synaptic vesicle glycoprotein 2B	Sv2b	11	11	11	17.9	17.9	17.9	77.456	0	75.296	685900000	219	11	10	10	11	10	9	11	11	11	10	10	10	11	10	10	11	10	9	11	11	11	10	10	10	26.2845	26.1411	26.2331	25.8038	26.1003	26.4833	25.7653	25.9392
	0.410719	-0.168395	Q8BG51;Q8BG51-2;Q8BG51-3;Q8BG51-4;F7ASU3	Q8BG51;Q8BG51-2;Q8BG51-3;Q8BG51-4;F7ASU3	Mitochondrial Rho GTPase 1	Rhot1	4	4	4	8.6	8.6	8.6	72.241	0	8.5624	29875000	4	2	3	2	2	2	2	3	2	3	3	2	3	2	3	2	2	2	2	3	2	3	3	2	3	21.1984	21.7608	21.3418	21.5808	21.6852	21.5401	21.6303	21.4278
	0.261944	-0.115533	Q8BGB7-2;Q8BGB7	Q8BGB7-2;Q8BGB7	Enolase-phosphatase E1	Enoph1	2	2	2	15	15	15	25.358	0	14.258	140720000	22	1	1	1	1	1	1	2	1	1	2	1	1	1	1	1	1	1	1	2	1	1	2	1	1	23.9572	24.007	23.4643	23.954	23.8643	23.9568	23.8618	24.0241
	0.578022	-0.251647	Q8BGH2	Q8BGH2	Sorting and assembly machinery component 50 homolog	Samm50	9	9	9	26.2	26.2	26.2	51.863	0	31.075	192820000	40	9	7	7	7	8	5	6	7	5	7	8	8	9	7	7	7	8	5	6	7	5	7	8	8	23.7819	24.3644	24.3191	24.3249	24.3948	24.5007	24.2439	24.3346
	1.10212	0.175191	Q8BGN8-2;A0A286YDB6;Q8BGN8;D3Z5Q8	Q8BGN8-2;A0A286YDB6;Q8BGN8	Synaptoporin	Synpr	4	4	4	16.8	16.8	16.8	31.348	0	45.596	370920000	39	3	4	3	4	3	3	4	4	4	4	3	3	3	4	3	4	3	3	4	4	4	4	3	3	25.3725	25.5511	25.5546	25.245	25.3095	25.3981	25.1498	25.2684
	0.693161	-0.21766	Q8BGQ7	Q8BGQ7	Alanine--tRNA ligase, cytoplasmic	Aars	16	16	16	24.9	24.9	24.9	106.91	0	120.08	317170000	87	12	8	10	10	8	9	10	10	10	14	11	9	12	8	10	10	8	9	10	10	10	14	11	9	24.9446	24.5918	24.9407	24.9802	25.2066	24.9432	25.049	24.7849
	0.481771	-0.287888	Q8BGS2;Q8BGS2-2	Q8BGS2	BolA-like protein 2	Bola2	3	3	3	54.7	54.7	54.7	10.214	0	17.315	53051000	11	3	3	3	2	2	2	3	2	3	2	3	3	3	3	3	2	2	2	3	2	3	2	3	3	22.3622	22.758	22.0079	22.5203	22.9503	22.5211	22.1575	22.6664
	0.535127	0.167734	Q8BGT8-2;Q8BGT8;F6U6Z2;F7D3N3;E0CXW9	Q8BGT8-2;Q8BGT8;F6U6Z2;F7D3N3	Phytanoyl-CoA hydroxylase-interacting protein-like	Phyhipl	9	7	7	47.5	38.9	38.9	22.83	0	33.09	206060000	36	6	5	5	6	6	6	6	6	6	5	5	6	6	5	5	6	6	6	6	6	6	5	5	6	24.6796	24.2918	24.4981	24.1663	24.438	24.362	24.1278	24.0922
	0.0120324	-0.00230916	Q8BGZ1;F2Z3Z1	Q8BGZ1;F2Z3Z1	Hippocalcin-like protein 4	Hpcal4	10	9	9	66	61.3	61.3	22.215	0	181.04	707600000	156	7	8	7	8	7	6	8	7	7	8	7	6	7	8	7	8	7	6	8	7	7	8	7	6	26.2865	26.1047	26.1349	26.1495	26.236	26.1476	26.032	26.0778
	1.05597	0.292683	Q8BH44;G3UW48;G3V005;G3UWZ2;G3UYG8	Q8BH44;G3UW48	Coronin-2B;Coronin	Coro2b	10	10	10	31.2	31.2	31.2	54.936	0	38	218790000	56	9	9	10	9	8	8	7	9	8	9	9	8	9	9	10	9	8	8	7	9	8	9	9	8	24.7086	24.6725	24.5157	24.4717	24.4387	24.1084	24.3231	24.6908
	0.00108236	-0.00115458	Q8BH58	Q8BH58	TIP41-like protein	Tiprl	2	2	2	17	17	17	31.253	0	6.9554	93997000	13	1	2	2	1	2	2	2	2	1	2	2	2	1	2	2	1	2	2	2	2	1	2	2	2	23.5069	22.9966	23.2328	23.7211	22.6502	23.3685	23.2711	22.8141
	0.368214	-0.0490227	Q8BH59;V9GXX9	Q8BH59	Calcium-binding mitochondrial carrier protein Aralar1	Slc25a12	28	28	25	57.6	57.6	53.3	74.569	0	323.31	3349100000	751	27	26	26	25	25	24	26	25	24	27	26	25	24	23	23	22	22	21	23	22	21	24	23	22	28.3029	28.2503	28.3949	28.3263	28.4376	28.3313	28.3619	28.4141
	1.09105	-0.151373	Q8BH66;A0A1Y7VLD6	Q8BH66	Atlastin-1	Atl1	9	9	9	27.6	27.6	27.6	63.377	0	32.99	183800000	22	5	6	7	6	7	4	4	8	5	7	7	7	5	6	7	6	7	4	4	8	5	7	7	7	24.149	24.1658	24.0762	24.1737	24.3775	24.294	23.9301	24.0366
	1.33623	-0.253544	Q8BH80;Q9QY76	Q8BH80;Q9QY76	Vesicle-associated membrane protein-associated protein B	Vapb	6	5	5	32.1	27.2	27.2	26.918	0	19.847	232650000	76	4	5	4	5	5	5	5	5	5	5	5	4	4	5	4	5	5	5	5	5	5	5	5	4	24.2426	24.3734	24.5321	24.6129	24.6949	24.6008	24.2626	24.5181
	0.107534	-0.0338942	Q8BH95	Q8BH95	Enoyl-CoA hydratase, mitochondrial	Echs1	8	8	8	32.8	32.8	32.8	31.474	0	61.817	345080000	181	6	7	6	6	7	6	7	8	8	7	6	7	6	7	6	6	7	6	7	8	8	7	6	7	24.9879	25.0252	25.3205	25.0604	25.2043	25.1706	25.1406	25.088
	0.406896	-0.0662937	Q8BHE3;F6VF29;Q91VL0;G5E8U9;O54940	Q8BHE3	Caytaxin	Atcay	5	5	5	25.5	25.5	25.5	42.178	0	20.238	193770000	39	4	4	4	4	4	4	4	4	4	4	4	5	4	4	4	4	4	4	4	4	4	4	4	5	24.0681	24.2628	24.2494	24.31	24.2099	24.2593	24.1556	24.0696
	0.0413728	-0.0236193	Q8BHL5-2;Q8BHL5;Q8BHL5-3;F6YXR3;Q5GMG0;Q8BPU7-4;Q8BPU7-2;Q8BPU7	Q8BHL5-2;Q8BHL5;Q8BHL5-3;F6YXR3	Engulfment and cell motility protein 2	Elmo2	5	5	5	11.7	11.7	11.7	82.542	0	17.689	62294000	6	4	3	4	5	2	4	4	4	3	4	4	3	4	3	4	5	2	4	4	4	3	4	4	3	22.9282	22.4212	22.4922	22.6216	22.8397	22.451	22.5791	22.5297
	0.105335	0.0283457	Q8BHN3;Q8BHN3-2;Q8BHN3-3	Q8BHN3;Q8BHN3-2;Q8BHN3-3	Neutral alpha-glucosidase AB	Ganab	17	17	17	25.7	25.7	25.7	106.91	0	41.21	250270000	39	12	15	13	15	14	14	10	15	12	13	13	14	12	15	13	15	14	14	10	15	12	13	13	14	24.8294	24.6759	24.6953	24.5682	24.6889	24.8583	24.2968	24.5331
	2.57559	0.141915	Q8BHZ0	Q8BHZ0	Protein FAM49A	Fam49a	10	10	9	42.7	42.7	38.7	37.342	0	56.18	263140000	69	8	9	8	6	5	7	6	8	7	9	7	6	7	8	7	5	4	6	5	7	6	8	6	5	24.6682	24.7408	24.7128	24.5708	24.5612	24.564	24.7238	24.8992
	0.0071646	-0.00527255	Q8BI08	Q8BI08	Protein MAL2	Mal2	3	3	3	18.3	18.3	18.3	19.094	0	11.343	109510000	46	2	2	2	2	1	2	1	2	2	3	2	2	2	2	2	2	1	2	1	2	2	3	2	2	23.2256	23.8254	23.2521	23.7227	23.3147	23.2816	23.2386	23.3141
	0.441139	0.144635	Q8BIG7	Q8BIG7	Catechol O-methyltransferase domain-containing protein 1	Comtd1	1	1	1	6.1	6.1	6.1	28.96	0	3.6597	40085000	12	1	1	1	1	1	1	1	1	1	1	1	1	1	1	1	1	1	1	1	1	1	1	1	1	22.0738	21.9451	22.1178	22.1613	21.7487	21.7927	21.9509	21.6799
	0.522259	-0.0725765	Q8BIJ6;E9PWN2;E9PWN3	Q8BIJ6;E9PWN2;E9PWN3	Isoleucine--tRNA ligase, mitochondrial	Iars2	15	15	15	22	22	22	112.8	0	84.709	345540000	84	13	12	11	12	11	8	7	13	11	13	13	9	13	12	11	12	11	8	7	13	11	13	13	9	25.0851	24.9693	25.0946	25.0599	25.2118	25.0952	25.0367	25.0562
	0.428986	0.179232	Q8BJY1;F7BA91	Q8BJY1	26S proteasome non-ATPase regulatory subunit 5	Psmd5	7	7	7	20.6	20.6	20.6	55.971	0	22.515	115520000	32	3	5	5	4	6	4	3	5	6	5	5	4	3	5	5	4	6	4	3	5	6	5	5	4	23.4348	23.7361	23.2676	23.442	23.0737	23.3851	23.5643	23.7587
	0.342104	-0.227972	Q8BK30	Q8BK30	NADH dehydrogenase [ubiquinone] flavoprotein 3, mitochondrial	Ndufv3	1	1	1	16.3	16.3	16.3	11.813	0	47.516	86265000	37	1	1	1	1	1	1	1	1	1	1	1	1	1	1	1	1	1	1	1	1	1	1	1	1	22.7475	23.0058	23.4205	22.9351	23.6048	23.3178	22.8431	23.0851
	0.282493	0.0988445	Q8BK64	Q8BK64	Activator of 90 kDa heat shock protein ATPase homolog 1	Ahsa1	6	6	6	24	24	24	38.117	0	27.764	283320000	31	6	6	6	6	6	5	5	6	6	5	6	6	6	6	6	6	6	5	5	6	6	5	6	6	24.4911	24.9373	24.8698	24.6252	24.7091	24.6672	24.8963	24.6242
	0.0294605	0.0267601	Q8BKC5-2;Q8BKC5	Q8BKC5-2;Q8BKC5	Importin-5	Ipo5	12	12	12	15.3	15.3	15.3	116.91	0	34.531	134640000	29	7	7	8	5	6	3	6	6	8	9	6	7	7	7	8	5	6	3	6	6	8	9	6	7	23.5038	23.6769	23.8771	23.09	23.8973	23.9902	23.5183	23.6288
	0.0778035	-0.0303701	Q8BKZ9;A2AWH8;A2AWH7	Q8BKZ9	Pyruvate dehydrogenase protein X component, mitochondrial	Pdhx	7	7	7	21.2	21.2	21.2	53.998	0	31.055	303890000	64	7	7	7	6	6	6	6	5	5	7	6	5	7	7	7	6	6	6	6	5	5	7	6	5	24.8357	24.5765	24.7969	24.7371	24.5905	24.9725	24.9877	25.1413
	0.283376	0.161692	Q8BL97-3;Q8BL97-4;Q8BL97-2;Q8BL97	Q8BL97-3;Q8BL97-4;Q8BL97-2;Q8BL97	Serine/arginine-rich splicing factor 7	Srsf7	5	5	4	32.5	32.5	32.5	17.89	0	15.361	147100000	24	4	3	4	2	4	3	3	4	3	4	5	4	3	2	3	2	3	3	2	3	3	3	4	4	23.7298	23.9133	23.9424	24.0964	23.6681	23.3359	23.7583	24.2164
	1.12199	0.265706	Q8BLF1;Q8BYQ0	Q8BLF1	Neutral cholesterol ester hydrolase 1	Nceh1	6	6	6	16.9	16.9	16.9	45.739	0	19.121	114800000	64	6	5	5	5	6	3	5	6	6	5	6	5	6	5	5	5	6	3	5	6	6	5	6	5	23.459	23.7825	23.5849	23.4507	23.3332	23.2453	23.327	23.6676
	1.29461	-0.287416	Q8BMF3;A0A140LHQ4	Q8BMF3	NADP-dependent malic enzyme, mitochondrial	Me3	9	9	9	28.6	28.6	28.6	67.098	0	102.55	337770000	58	6	6	7	9	7	6	5	8	7	8	9	7	6	6	7	9	7	6	5	8	7	8	9	7	25.0393	24.7852	25.0185	25.1229	25.2352	25.3472	25.1514	25.1404
	0.0928354	-0.0283203	Q8BMF4	Q8BMF4	Dihydrolipoyllysine-residue acetyltransferase component of pyruvate dehydrogenase complex, mitochondrial	Dlat	14	14	14	34.1	34.1	34.1	67.941	0	103.82	2093200000	513	14	14	14	14	14	14	13	14	14	14	12	13	14	14	14	14	14	14	13	14	14	14	12	13	27.5988	27.909	27.5964	27.7951	27.6972	27.6968	27.6613	27.5746
	2.41989	-0.301015	Q8BMS1	Q8BMS1	Trifunctional enzyme subunit alpha, mitochondrial;Long-chain enoyl-CoA hydratase;Long chain 3-hydroxyacyl-CoA dehydrogenase	Hadha	15	15	15	32.9	32.9	32.9	82.669	0	175.05	899720000	195	14	12	12	14	11	13	13	14	14	14	14	13	14	12	12	14	11	13	13	14	14	14	14	13	26.225	26.305	26.308	26.5088	26.5786	26.6536	26.4167	26.5448
	0.0240151	-0.0309753	Q8BMS4	Q8BMS4	Ubiquinone biosynthesis O-methyltransferase, mitochondrial	Coq3	2	2	2	8.9	8.9	8.9	40.956	0	13.469	33026000	11	2	2	2	2	2	2	1	2	2	1	2	2	2	2	2	2	2	2	1	2	2	1	2	2	21.417	22.2427	21.6442	22.3407	21.1328	21.9235	21.8297	22.0343
	0.961467	0.246534	Q8BNW9	Q8BNW9	Kelch repeat and BTB domain-containing protein 11	Kbtbd11	9	9	9	28.6	28.6	28.6	67.945	0	27.549	219070000	32	7	7	8	8	8	6	6	9	8	7	8	8	7	7	8	8	8	6	6	9	8	7	8	8	24.5041	24.8057	24.4982	24.4225	24.2279	24.4179	24.7392	24.5601
	0.947352	-0.329782	Q8BNY6;A0A0A6YY43	Q8BNY6	Neuronal calcium sensor 1	Ncs1	6	6	6	38.9	38.9	38.9	21.878	0	20.408	150540000	21	4	4	3	4	4	5	4	3	5	5	4	4	4	4	3	4	4	5	4	3	5	5	4	4	23.7883	23.9148	24.2709	24.3293	24.187	24.447	23.5647	23.5469
	0.441672	-0.0756753	Q8BP47	Q8BP47	Asparagine--tRNA ligase, cytoplasmic	Nars	13	13	13	30.9	30.9	30.9	64.279	0	107.8	365380000	124	12	12	12	11	11	7	11	9	12	11	11	12	12	12	12	11	11	7	11	9	12	11	11	12	24.8919	25.1316	25.0624	25.1398	25.0951	25.078	25.2812	25.3518
	0.461466	0.324212	Q8BP67	Q8BP67	60S ribosomal protein L24	Rpl24	3	3	3	20.4	20.4	20.4	17.779	0	15.544	66862000	34	3	1	3	3	2	3	3	3	3	3	3	3	3	1	3	3	2	3	3	3	3	3	3	3	22.8244	22.8264	22.8907	22.7112	21.9306	22.9272	22.5497	22.7255
	0.231354	-0.0471656	Q8BR92	Q8BR92	Paralemmin-2	Palm2	5	5	3	16.5	16.5	8.5	42.095	0	21.152	44730000	5	4	5	4	5	5	3	5	4	3	5	5	4	2	3	3	3	3	2	3	3	2	3	3	2	22.1352	22.0681	22.031	22.232	21.9833	22.1604	22.3306	21.8648
	0.268777	0.0681947	Q8BRK8;Q3TUQ7;Q5EG47	Q8BRK8;Q3TUQ7;Q5EG47	5-AMP-activated protein kinase catalytic subunit alpha-2;5-AMP-activated protein kinase catalytic subunit alpha-1	Prkaa2;Prkaa1	3	3	3	8.3	8.3	8.3	62.022	0	11.71	31792000	9	3	3	3	3	2	2	2	2	2	2	2	3	3	3	3	3	2	2	2	2	2	2	2	3	21.8138	21.523	21.708	21.7044	21.6229	21.5128	22.0382	21.3973
	0.320976	-0.101108	Q8BRQ9;Q925N0;D3YXH5	Q8BRQ9;Q925N0;D3YXH5	Sideroflexin;Sideroflexin-5	Sfxn5	8	8	8	45.4	45.4	45.4	32.783	0	106.32	371290000	68	6	5	5	4	6	5	5	6	7	8	6	6	6	5	5	4	6	5	5	6	7	8	6	6	24.962	24.9795	25.1221	24.9096	25.3204	25.1369	25.2377	25.2548
	0.0747335	0.0452677	Q8BTG7;Q8BTG7-2;Q8BTG7-3;E0CZ50;A0A1D5RMH3;A0A1D5RM17	Q8BTG7;Q8BTG7-2;Q8BTG7-3;E0CZ50	Protein NDRG4	Ndrg4	6	6	6	31	31	31	38.508	0	43.999	133770000	59	6	6	5	5	4	3	4	5	6	6	4	4	6	6	5	5	4	3	4	5	6	6	4	4	23.3068	23.4135	23.9089	23.3251	23.6851	23.4832	23.7365	23.5509
	0.283806	0.0749245	Q8BVI4;D3YWR7;A0A0G2JGJ1;A0A0G2JGY0;D3Z1A1;D3Z099	Q8BVI4;D3YWR7;A0A0G2JGJ1;A0A0G2JGY0	Dihydropteridine reductase	Qdpr	9	9	9	53.1	53.1	53.1	25.57	0	175.33	925250000	435	9	9	9	8	8	9	9	9	8	8	9	8	9	9	9	8	8	9	9	9	8	8	9	8	26.5336	26.4692	26.4234	26.5134	26.4901	26.1979	26.3883	26.4787
	0.0663085	0.0481071	Q8BVQ5;A0A140LI84	Q8BVQ5	Protein phosphatase methylesterase 1	Ppme1	8	8	8	32.4	32.4	32.4	42.256	0	30.616	224380000	38	7	7	7	5	8	5	5	7	6	6	6	5	7	7	7	5	8	5	5	7	6	6	6	5	24.5811	24.5283	24.2114	24.8416	24.1873	24.1476	24.4822	24.5924
	0.325744	0.101465	Q8BW75;E9Q3X6;E9PVL9	Q8BW75;E9Q3X6	Amine oxidase [flavin-containing] B	Maob	8	8	8	26.2	26.2	26.2	58.557	0	75.046	213410000	54	7	7	7	8	7	7	7	8	7	7	8	7	7	7	7	8	7	7	7	8	7	7	8	7	24.5231	24.3359	24.1489	24.3709	24.152	24.1806	24.487	24.2517
	0.519328	0.150785	Q8BW96-2;Q8BW96-3;Q8BW96	Q8BW96-2;Q8BW96-3;Q8BW96	Calcium/calmodulin-dependent protein kinase type 1D	Camk1d	6	6	4	21.5	21.5	16.9	41.109	0	17.494	120350000	19	5	4	5	4	4	2	5	4	6	4	3	6	4	3	4	4	3	2	4	3	4	4	3	4	23.6269	23.968	23.6754	23.4853	23.6047	23.728	23.1948	23.4415
	1.01106	-0.104886	Q8BWF0	Q8BWF0	Succinate-semialdehyde dehydrogenase, mitochondrial	Aldh5a1	13	13	13	36.3	36.3	36.3	55.968	0	190.11	1151500000	218	13	11	10	13	12	13	13	12	13	12	13	12	13	11	10	13	12	13	13	12	13	12	13	12	26.704	26.6454	26.5935	26.8198	26.6932	26.7445	26.8988	26.8451
	0.598096	-0.151234	Q8BWT1	Q8BWT1	3-ketoacyl-CoA thiolase, mitochondrial	Acaa2	5	5	5	22.2	22.2	22.2	41.829	0	35.302	214980000	51	5	5	5	4	5	4	4	5	5	5	5	5	5	5	5	4	5	4	4	5	5	5	5	5	24.4205	24.052	24.3427	24.3965	24.4239	24.4485	24.4041	24.239
	0.228162	-0.0404879	Q8BYI9;Q8BYI9-2;A0A0A6YWD9	Q8BYI9;Q8BYI9-2	Tenascin-R	Tnr	25	25	25	27	27	27	149.59	0	323.31	2767700000	611	22	23	24	24	23	23	24	23	22	24	22	22	22	23	24	24	23	23	24	23	22	24	22	22	27.9542	28.1429	27.9584	28.1108	28.0039	28.0621	28.1003	28.1424
	0.601526	-0.173143	Q8C0E2;Q8C0E2-2	Q8C0E2;Q8C0E2-2	Vacuolar protein sorting-associated protein 26B	Vps26b	4	4	4	20.2	20.2	20.2	39.124	0	13.626	97546000	40	4	3	3	2	3	3	3	3	3	4	2	3	4	3	3	2	3	3	3	3	3	4	2	3	23.0795	23.3431	23.3526	23.2477	23.502	23.5449	23.1965	23.1485
	0.461113	-0.164036	Q8C0L0;A2ARI0	Q8C0L0;A2ARI0	Thioredoxin-related transmembrane protein 4	Tmx4	5	5	5	20.6	20.6	20.6	37.131	0	11.094	59885000	30	4	2	4	4	4	3	4	4	5	3	4	2	4	2	4	4	4	3	4	4	5	3	4	2	22.474	22.6165	22.6251	23.0093	22.5123	22.6861	22.8595	22.7129
	0.583337	-0.0584888	Q8C0M9	Q8C0M9	Isoaspartyl peptidase/L-asparaginase;Isoaspartyl peptidase/L-asparaginase alpha chain;Isoaspartyl peptidase/L-asparaginase beta chain	Asrgl1	7	7	7	26.4	26.4	26.4	33.95	0	49.869	395910000	175	5	6	7	6	6	7	6	6	6	6	6	6	5	6	7	6	6	7	6	6	6	6	6	6	25.2532	25.2292	25.2429	25.3849	25.236	25.2799	25.2633	25.2085
	0.110366	0.0277265	Q8C2Q3;E9QL13;Q8C2Q3-2	Q8C2Q3;E9QL13;Q8C2Q3-2	RNA-binding protein 14	Rbm14	2	2	2	4.9	4.9	4.9	69.448	0	5.0865	32130000	1	1	1	1	2	2	2	2	2	2	1	2	2	1	1	1	2	2	2	2	2	2	1	2	2	21.8995	21.7034	21.7564	21.631	21.8703	21.7749	21.5451	21.513
	0.194273	0.0778739	Q8C2Q8;Q91VR2;A2AKU9;A2AKV2;A2AKV3;A2AKV1;A2AKV0	Q8C2Q8;Q91VR2;A2AKU9;A2AKV2;A2AKV3;A2AKV1	ATP synthase subunit gamma;ATP synthase subunit gamma, mitochondrial	Atp5c1	10	10	10	46.4	46.4	46.4	30.255	0	55.841	1045600000	262	10	8	9	8	7	6	9	9	8	10	9	9	10	8	9	8	7	6	9	9	8	10	9	9	26.5941	26.2669	26.7552	26.3775	26.4402	26.5648	26.5581	26.3594
	0.0279732	0.0194887	Q8C413;Q91WG7;F2Z409	Q8C413;Q91WG7	Diacylglycerol kinase;Diacylglycerol kinase gamma	Dgkg	6	6	6	13.2	13.2	13.2	83.971	0	22.279	76244000	14	6	4	3	4	6	4	4	3	4	5	4	4	6	4	3	4	6	4	4	3	4	5	4	4	23.2784	23.1878	22.9488	23.229	22.7086	23.4189	22.6873	22.5507
	0.0449909	0.0353076	Q8C419	Q8C419	Probable G-protein coupled receptor 158	Gpr158	8	8	8	10.2	10.2	10.2	134.42	0	40.044	122630000	22	3	6	6	5	5	6	5	7	5	6	5	8	3	6	6	5	5	6	5	7	5	6	5	8	23.3839	23.8542	23.4216	23.6683	23.8039	23.0817	23.4605	23.9817
	0.428705	-0.11248	Q8C522;A0A1L1SSA0	Q8C522	Endonuclease domain-containing 1 protein	Endod1	5	5	5	18	18	18	55.262	0	20.712	118630000	39	4	5	5	4	4	5	5	4	4	5	5	4	4	5	5	4	4	5	5	4	4	5	5	4	23.2274	23.4559	23.2947	23.5586	23.2639	23.493	23.6455	23.5438
	1.78117	0.20062	Q8C605;Q9WUA3;Q9WUA3-2;D3YUA3;F6YL81	Q8C605;Q9WUA3;Q9WUA3-2	ATP-dependent 6-phosphofructokinase;ATP-dependent 6-phosphofructokinase, platelet type	Pfkp	19	17	17	31	27.4	27.4	85.546	0	273.67	810720000	211	15	15	14	15	13	13	15	13	15	16	13	14	15	15	14	15	13	13	15	13	15	16	13	14	26.3226	26.3841	26.2637	26.1836	26.1282	26.0568	26.3831	26.3225
	0.642639	0.265719	Q8C729;Q8C729-2;E0CZ67;A0A087WSI2	Q8C729;Q8C729-2;E0CZ67;A0A087WSI2	Protein FAM126B	Fam126b	4	4	4	11.3	11.3	11.3	58.586	0	7.4866	44205000	7	2	3	3	3	3	2	2	2	2	2	3	3	2	3	3	3	3	2	2	2	2	2	3	3	21.8219	22.2615	22.3466	21.7405	22.0517	21.8407	22.057	22.137
	2.158	-0.277686	Q8C845;Q9D8Y0;Q9D4J1	Q8C845;Q9D8Y0	EF-hand domain-containing protein D2	Efhd2	14	14	14	47.1	47.1	47.1	26.8	0	53.701	328290000	111	11	10	9	11	10	10	9	10	10	9	10	10	11	10	9	11	10	10	9	10	10	9	10	10	24.8768	24.7758	24.7438	25.0029	25.1132	25.1134	24.8925	24.8134
	0.0913914	0.084823	Q8C8N2;A0A0N4SVJ6;Q8C8N2-2	Q8C8N2;A0A0N4SVJ6;Q8C8N2-2	Protein SCAI	Scai	5	5	4	9.7	9.7	7.9	70.274	0	24.608	49723000	10	4	3	5	4	4	3	5	5	3	3	4	3	3	2	4	3	4	2	4	4	3	3	4	3	21.5904	22.3052	22.3591	22.3556	22.0441	21.6006	22.7153	22.5905
	0.202809	0.042689	S4R2F3;Q8C8R3-2;S4R2R5;Q8C8R3-5;Q8C8R3;Q8C8R3-4;S4R2T7;Q8C8R3-3;S4R1J9;S4R1I1;S4R2D6;Q8C8R3-8;Q8C8R3-7;Q8C8R3-6;S4R1M4;S4R1B7;S4R1U2;A0A1D5RLB2	S4R2F3;Q8C8R3-2;S4R2R5;Q8C8R3-5;Q8C8R3;Q8C8R3-4	Ankyrin-2	Ank2	63	63	59	26.5	26.5	25.2	429.1	0	323.31	2801100000	627	53	53	52	58	53	47	48	52	52	52	51	54	49	50	49	54	50	43	44	48	48	49	47	50	27.9451	28.208	28.1343	28.0679	28.0809	28.0106	27.9921	28.1756
	0.127973	0.0233262	Q8CAA7;E0CX81	Q8CAA7	Glucose 1,6-bisphosphate synthase	Pgm2l1	17	17	17	39.3	39.3	39.3	70.279	0	90.958	500850000	175	15	13	15	14	15	14	13	13	12	15	14	14	15	13	15	14	15	14	13	13	12	15	14	14	25.5707	25.6149	25.6882	25.6654	25.6518	25.4867	25.7125	25.6353
	0.537671	-0.0722211	Q8CAQ8;Q8CAQ8-5;E9Q800;E9QAY6;A0A0U1RQ14;A0A1B0GX08;E9PVS5	Q8CAQ8;Q8CAQ8-5;E9Q800;E9QAY6	MICOS complex subunit Mic60	Immt	19	19	1	39.2	39.2	5.2	83.899	0	142.81	874750000	238	16	14	15	15	15	13	16	15	15	18	17	15	1	0	1	1	1	1	0	1	1	1	1	1	26.3743	26.3755	26.4977	26.4185	26.4794	26.5662	26.5241	26.3274
	1.18071	0.737887	Q8CAQ8-2;Q8CAQ8-3;A0A0U1RP81;Q8CAQ8-4	Q8CAQ8-2;Q8CAQ8-3;A0A0U1RP81	MICOS complex subunit Mic60	Immt	19	1	1	38.3	3.8	3.8	82.928	0	4.5009	51715000	9	1	1	1	1	1	1	1	1	1	1	1	1	1	1	1	1	1	1	1	1	1	1	1	1	23.0013	22.6073	23.2323	21.8011	22.5981	22.228	22.138	22.2009
	0.176992	-0.0403678	Q8CBE3;H3BK66;Q05BF4;H3BJR7;H3BJS1;H3BJB3	Q8CBE3	WD repeat-containing protein 37	Wdr37	6	6	6	20	20	20	55.045	0	22.061	139920000	13	6	5	6	6	6	2	3	5	6	6	5	6	6	5	6	6	6	2	3	5	6	6	5	6	23.7319	23.9076	23.7792	23.8493	23.726	23.9645	23.483	23.6271
	0.0145928	0.0106055	Q8CBY8-2;Q8CBY8	Q8CBY8-2;Q8CBY8	Dynactin subunit 4	Dctn4	6	6	6	20.9	20.9	20.9	52.241	0	16.582	57885000	7	4	4	5	4	4	2	2	4	5	5	4	6	4	4	5	4	4	2	2	4	5	5	4	6	22.4098	22.1572	22.7639	22.1049	22.5914	22.6028	22.7345	22.4307
	0.233328	0.0753206	Q8CC35-3;Q8CC35;E9Q3E2;Q8CC35-2	Q8CC35-3;Q8CC35;E9Q3E2;Q8CC35-2	Synaptopodin	Synpo	10	10	10	24.9	24.9	24.9	74.016	0	87.974	310410000	70	9	8	8	7	8	9	8	9	6	8	8	10	9	8	8	7	8	9	8	9	6	8	8	10	24.8871	25.1047	24.9098	25.0341	24.6839	24.9576	24.8384	24.8394
	1.8658	-0.201021	Q8CDN6	Q8CDN6	Thioredoxin-like protein 1	Txnl1	6	6	6	32.9	32.9	32.9	32.237	0	24.262	235560000	68	6	6	6	6	6	6	6	6	6	6	6	6	6	6	6	6	6	6	6	6	6	6	6	6	24.4391	24.388	24.4303	24.6525	24.5311	24.6769	24.4361	24.6298
	0.68959	0.305649	Q8CG76	Q8CG76	Aflatoxin B1 aldehyde reductase member 2	Akr7a2	3	3	3	13.9	13.9	13.9	40.612	0	27.741	100250000	14	2	3	2	2	2	2	2	2	2	2	3	2	2	3	2	2	2	2	2	2	2	2	3	2	23.1546	23.5348	23.6138	23.2031	22.8514	23.3318	23.0612	23.563
	0.132567	0.0583159	Q8CGC7;A0A0A6YWH3;A0A0A6YWA4	Q8CGC7	Bifunctional glutamate/proline--tRNA ligase;Glutamate--tRNA ligase;Proline--tRNA ligase	Eprs	10	10	10	10.4	10.4	10.4	170.08	0	26.69	128370000	24	5	7	8	7	6	5	5	7	4	9	5	5	5	7	8	7	6	5	5	7	4	9	5	5	23.4791	23.9904	23.8132	23.5825	23.7833	23.7421	23.6266	23.6308
	0.00848565	0.00473086	Q8CGK3	Q8CGK3	Lon protease homolog, mitochondrial	Lonp1	14	14	14	29.8	29.8	29.8	105.84	0	144.9	249030000	56	10	9	10	8	9	4	6	10	9	13	7	8	10	9	10	8	9	4	6	10	9	13	7	8	24.8902	24.2814	24.49	24.6095	24.5677	24.4701	24.5131	24.5025
	1.14089	0.128881	Q8CGY8-2	Q8CGY8-2	UDP-N-acetylglucosamine--peptide N-acetylglucosaminyltransferase 110 kDa subunit	Ogt	15	15	1	22.2	22.2	1.8	115.73	0	104.53	306060000	71	12	11	12	12	12	11	10	10	11	12	13	12	0	0	1	1	1	1	1	1	0	0	1	1	24.9706	25.0946	24.9929	24.8648	24.8433	24.9634	24.9424	24.9097
	0.00489081	0.00295766	Q8CHP8	Q8CHP8	Phosphoglycolate phosphatase	Pgp	6	6	6	25.9	25.9	25.9	34.54	0	36.972	138610000	20	6	5	5	5	5	5	5	5	6	5	3	4	6	5	5	5	5	5	5	5	6	5	3	4	23.6472	23.9213	23.7545	23.6923	24.1174	23.5045	23.6805	23.7184
	2.38711	-0.625399	Q8CHT0	Q8CHT0	Delta-1-pyrroline-5-carboxylate dehydrogenase, mitochondrial	Aldh4a1	3	3	3	7.5	7.5	7.5	61.84	0	28.704	68239000	17	3	3	3	3	3	3	3	2	3	3	3	3	3	3	3	3	3	3	3	2	3	3	3	3	22.2267	22.4783	22.4247	22.8929	22.9722	23.1407	22.6478	22.5291
	0.171253	0.0196457	Q8CI94;Q3UEJ6	Q8CI94	Glycogen phosphorylase, brain form	Pygb	39	39	31	52	52	42.9	96.729	0	323.31	3408900000	820	33	34	34	35	35	33	32	34	33	34	34	34	27	28	28	28	28	26	26	27	26	28	27	27	28.3799	28.4492	28.3619	28.4458	28.3412	28.345	28.4304	28.43
	0.560789	-0.074007	Q8JZN5;A0A0G2JDY4;A0A0G2JF25	Q8JZN5	Acyl-CoA dehydrogenase family member 9, mitochondrial	Acad9	8	8	8	23.7	23.7	23.7	68.721	0	33.189	122810000	19	4	5	7	3	4	2	6	4	5	6	4	6	4	5	7	3	4	2	6	4	5	6	4	6	23.5939	23.4003	23.5178	23.5942	23.5459	23.5939	23.555	23.9651
	1.18063	-0.449654	Q8JZP2;D3Z620	Q8JZP2	Synapsin-3	Syn3	5	3	3	16.2	13.3	13.3	63.314	0	4.3551	51415000	4	3	2	3	2	3	1	1	2	2	3	1	3	3	2	3	2	3	1	1	2	2	3	1	3	22.0922	22.3213	22.1242	22.6492	22.9024	22.335	22.2769	22.1163
	0.0344335	-0.0126508	Q8JZS0;Q3TUM0;O88951	Q8JZS0;Q3TUM0;O88951	Protein lin-7 homolog A;Protein lin-7 homolog B	Lin7a;Lin7b	3	3	2	13.3	13.3	9	25.992	0	10.244	69094000	46	1	1	1	3	1	3	2	2	3	2	2	2	0	0	0	2	0	2	1	1	2	1	1	1	22.9618	22.7065	22.6162	22.9076	22.6792	22.7356	22.9181	22.5707
	0.643795	-0.123953	Q8K021;Q3TSA8;D3YTP4	Q8K021;Q3TSA8	Secretory carrier-associated membrane protein 1	Scamp1	6	6	6	34.3	34.3	34.3	38.028	0	92.151	1211500000	182	6	6	6	6	6	6	6	6	6	6	6	6	6	6	6	6	6	6	6	6	6	6	6	6	26.7969	26.7596	26.5329	26.871	26.8138	26.7764	26.9281	26.8154
	0.184306	0.0589224	Q8K0S0;E0CXJ1	Q8K0S0;E0CXJ1	Phytanoyl-CoA hydroxylase-interacting protein	Phyhip	9	9	7	39.4	39.4	34.2	37.554	0	45.065	373670000	123	8	7	5	6	6	6	7	6	7	9	7	7	6	5	3	4	4	4	5	4	5	7	5	5	25.4708	25.3551	25.0815	25.3072	25.2515	25.172	25.0658	25.0043
	0.91573	-0.184528	Q8K0T0	Q8K0T0	Reticulon-1	Rtn1	15	15	14	35.4	35.4	33.7	83.571	0	160.01	1470000000	282	14	14	14	14	13	13	13	14	14	15	14	14	13	13	13	13	12	12	12	13	13	14	13	13	26.7971	26.9665	27.1112	27.1554	27.1782	27.0949	27.0835	27.0527
	0.746482	0.0956103	Q8K0U4	Q8K0U4	Heat shock 70 kDa protein 12A	Hspa12a	20	20	18	33.3	33.3	31.4	74.87	0	215.48	1629500000	327	18	16	17	18	18	17	16	18	17	17	17	18	16	14	15	16	16	15	14	16	15	15	15	16	27.2918	27.3895	27.4908	27.3189	27.2764	27.2899	27.4931	27.4377
	1.53574	-0.406096	Q8K183	Q8K183	Pyridoxal kinase	Pdxk	10	10	10	42	42	42	35.015	0	51.181	639350000	86	9	9	10	8	7	6	7	9	7	10	10	9	9	9	10	8	7	6	7	9	7	10	10	9	25.8977	25.695	25.4999	26.0278	26.1139	26.1692	26.0224	25.9611
	0.0948808	0.0103099	Q8K1M6;Q8K1M6-2;E9PUD2;Q8K1M6-3;Q8K1M6-4;A0A2U3TZ67;Q8K1M6-5	Q8K1M6;Q8K1M6-2;E9PUD2;Q8K1M6-3;Q8K1M6-4;A0A2U3TZ67	Dynamin-1-like protein	Dnm1l	29	29	29	55.8	55.8	55.8	82.657	0	323.31	1701700000	433	28	27	26	28	27	25	26	26	25	27	27	27	28	27	26	28	27	25	26	26	25	27	27	27	27.3469	27.3657	27.4638	27.3624	27.3742	27.4088	27.3496	27.4035
	0.169462	-0.0955486	Q8K212;E9Q7E9;A0A1Y7VLZ7;Q3V3Q7	Q8K212	Phosphofurin acidic cluster sorting protein 1	Pacs1	9	9	9	13.1	13.1	13.1	104.83	0	17.146	117470000	26	4	8	4	5	6	6	5	4	7	5	5	8	4	8	4	5	6	6	5	4	7	5	5	8	23.5207	23.798	23.3442	23.6549	23.358	23.9367	23.3169	23.1305
	0.457457	0.0650997	Q8K2B3;A0A1Y7VJ55	Q8K2B3	Succinate dehydrogenase [ubiquinone] flavoprotein subunit, mitochondrial	Sdha	24	24	24	56.6	56.6	56.6	72.585	0	323.31	1701900000	375	22	22	22	21	21	22	21	21	23	22	23	21	22	22	22	21	21	22	21	21	23	22	23	21	27.4446	27.3259	27.2324	27.2685	27.2707	27.2684	27.5159	27.3366
	0.343325	0.218242	Q8K2C9	Q8K2C9	Very-long-chain (3R)-3-hydroxyacyl-CoA dehydratase 3	Hacd3	4	4	4	18.8	18.8	18.8	43.131	0	50.49	240320000	47	4	4	4	4	4	1	3	4	4	3	3	4	4	4	4	4	4	1	3	4	4	3	3	4	24.1442	24.7781	24.4854	24.627	24.0291	24.0969	24.3376	24.5109
	0.749205	-0.108517	Q8K310;A0A087WSU2;A0A087WSP7;A0A087WQZ1;A0A087WQD6;A0A087WQ54;A0A087WNW7;A0A087WNP3;A0A087WPU5;A0A087WPQ5	Q8K310;A0A087WSU2	Matrin-3	Matr3	15	15	15	30.4	30.4	30.4	94.629	0	288.14	1072300000	220	14	14	15	14	14	15	15	14	14	15	15	13	14	14	15	14	14	15	15	14	14	15	15	13	26.5687	26.6046	26.7551	26.736	26.8165	26.7013	26.7622	26.7323
	0.516383	-0.298431	Q8K354	Q8K354	Carbonyl reductase [NADPH] 3	Cbr3	4	3	3	22.7	19.9	19.9	30.953	0	32.089	82322000	20	2	2	2	2	2	1	3	2	3	3	3	3	2	2	2	2	2	1	3	2	3	3	3	3	23.0476	22.6675	22.7245	22.795	22.9948	23.5451	22.9134	23.0742
	1.36836	-0.130297	Q8K356;Q9WUC3	Q8K356;Q9WUC3	Lymphocyte antigen 6H	Ly6h	3	3	3	25	25	25	17.028	0	48.492	121310000	74	3	3	2	3	3	2	3	3	3	3	2	3	3	3	2	3	3	2	3	3	3	3	2	3	23.646	23.605	23.7087	23.8487	23.7555	23.7464	23.5164	23.4339
	0.106908	-0.0703201	Q8K3H0	Q8K3H0	DCC-interacting protein 13-alpha	Appl1	6	6	6	12	12	12	79.327	0	10.411	136370000	8	5	5	5	5	5	4	6	5	5	4	6	5	5	5	5	5	5	4	6	5	5	4	6	5	24.0014	23.7578	23.5834	24.1515	23.9404	23.4616	23.7556	23.4869
	0.281731	-0.0361563	Q8K3J1	Q8K3J1	NADH dehydrogenase [ubiquinone] iron-sulfur protein 8, mitochondrial	Ndufs8	5	5	5	26.4	26.4	26.4	24.038	0	53.102	393530000	112	5	5	5	5	5	5	5	5	5	5	5	5	5	5	5	5	5	5	5	5	5	5	5	5	25.2994	25.2316	25.2348	25.3207	25.3536	25.1999	25.3342	25.3941
	0.574995	-0.260196	Q8K4F5;A0A0J9YU40;D3YYK0	Q8K4F5;A0A0J9YU40;D3YYK0	Alpha/beta hydrolase domain-containing protein 11	Abhd11	2	2	2	17.3	17.3	17.3	33.56	0	7.4513	25246000	13	1	2	2	2	1	1	2	2	2	1	1	1	1	2	2	2	1	1	2	2	2	1	1	1	21.1398	21.0112	21.5793	21.4531	21.7052	21.3526	21.1696	21.4972
	0.303248	-0.0656064	Q8K4Z3	Q8K4Z3	NAD(P)H-hydrate epimerase	Apoa1bp	6	6	6	35.5	35.5	35.5	30.972	0	88.278	443210000	107	6	6	6	6	6	6	6	6	6	6	6	6	6	6	6	6	6	6	6	6	6	6	6	6	25.2878	25.5332	25.4762	25.4337	25.5906	25.4697	25.3568	25.4786
	1.31022	0.439477	Q8K596-2;Q8K596	Q8K596-2;Q8K596		Slc8a2	11	11	11	16.1	16.1	16.1	100.06	0	68.235	295470000	80	11	9	10	7	5	7	6	8	9	10	8	7	11	9	10	7	5	7	6	8	9	10	8	7	25.0031	24.9559	24.7132	24.5385	24.6178	24.1975	24.8396	24.8582
	0.712946	-0.583495	Q8QZS1;E0CX19	Q8QZS1;E0CX19	3-hydroxyisobutyryl-CoA hydrolase, mitochondrial	Hibch	4	4	4	16.4	16.4	16.4	43.037	0	12.121	41929000	18	4	3	4	2	3	2	2	3	2	2	3	3	4	3	4	2	3	2	2	3	2	2	3	3	21.0234	22.2643	21.6194	22.4259	22.0679	22.1638	21.8576	21.3259
	0.204899	-0.0371532	Q8QZT1	Q8QZT1	Acetyl-CoA acetyltransferase, mitochondrial	Acat1	13	13	13	42.2	42.2	42.2	44.816	0	287.03	1440300000	461	13	12	13	13	12	12	12	12	12	12	11	10	13	12	13	13	12	12	12	12	12	12	11	10	27.2265	27.0934	27.1906	27.2577	27.0922	27.2719	27.2409	27.0466
	0.454932	0.161186	Q8QZT2	Q8QZT2	Centriole, cilia and spindle-associated protein	Ccsap	2	2	2	11.9	11.9	11.9	28.378	0	3.8008	29883000	3	1	2	1	2	1	2	2	1	2	2	1	1	1	2	1	2	1	2	2	1	2	2	1	1	21.7173	21.6352	21.9625	21.6869	21.7636	21.3809	21.0423	21.4542
	1.23689	-0.499095	Q8QZY1;A0A2R8VH97	Q8QZY1;A0A2R8VH97	Eukaryotic translation initiation factor 3 subunit L	Eif3l	2	2	2	4.4	4.4	4.4	66.612	0	20.491	31389000	11	1	2	2	1	2	2	1	1	2	1	1	2	1	2	2	1	2	2	1	1	2	1	1	2	21.5322	21.3302	21.1123	21.7043	21.6539	22.1138	21.278	21.3607
	0.379204	-0.111141	Q8R016;E9Q6V3;E9PZH4;E9PY26	Q8R016;E9Q6V3;E9PZH4	Bleomycin hydrolase	Blmh	3	3	3	13.4	13.4	13.4	52.511	0	11.515	115430000	39	2	3	3	3	3	2	3	3	3	3	3	2	2	3	3	3	3	2	3	3	3	3	3	2	23.4516	23.3919	23.1971	23.594	23.2723	23.5077	23.3977	23.4772
	2.75504	0.336993	Q8R071;B2RXC2	Q8R071	Inositol-trisphosphate 3-kinase A	Itpka	14	14	14	44.9	44.9	44.9	50.934	0	59.953	352590000	101	12	12	12	11	12	8	12	12	12	13	11	11	12	12	12	11	12	8	12	12	12	13	11	11	25.3571	25.2983	25.3973	24.9441	25.0415	25.056	25.2162	25.2363
	0.275989	-0.0811825	Q8R081;G3UY38	Q8R081;G3UY38	Heterogeneous nuclear ribonucleoprotein L	Hnrnpl	10	10	1	37.5	37.5	6.5	63.963	0	81.533	473650000	94	10	10	9	10	10	10	8	10	9	8	9	10	1	1	1	1	1	1	1	1	1	1	1	1	25.5111	25.4152	25.5505	25.4009	25.7809	25.5385	25.378	25.5228
	1.39679	-0.186369	Q8R0Y6;A0A0N4SW56;A0A0N4SVT2	Q8R0Y6	Cytosolic 10-formyltetrahydrofolate dehydrogenase	Aldh1l1	18	18	16	29.4	29.4	27.1	98.708	0	84.197	369070000	126	11	13	10	15	14	9	10	12	13	14	13	12	9	11	8	13	12	7	8	10	11	12	11	10	25.0991	24.9852	24.9915	25.2873	25.2306	25.117	25.2189	25.241
	0.0571748	-0.0203698	Q8R123;Q8R123-2;F8WGX4	Q8R123;Q8R123-2	FAD synthase;Molybdenum cofactor biosynthesis protein-like region;FAD synthase region	Flad1	4	4	4	18.3	18.3	18.3	54.766	0	8.6641	28230000	2	3	2	2	2	3	2	2	2	3	3	2	2	3	2	2	2	3	2	2	2	3	3	2	2	21.6005	21.5684	21.2937	21.6426	21.3818	21.4993	21.6518	21.3834
	0.262114	0.135837	Q8R127;J3QNN5;F6S0R8	Q8R127	Saccharopine dehydrogenase-like oxidoreductase	Sccpdh	5	5	5	23.1	23.1	23.1	47.129	0	28.34	88092000	25	4	4	5	5	4	4	2	4	3	5	5	4	4	4	5	5	4	4	2	4	3	5	5	4	23.1747	22.8936	23.4988	23.2165	22.8435	23.0997	23.1508	23.1321
	0.546439	-0.129237	Q8R164	Q8R164	Valacyclovir hydrolase	Bphl	6	6	6	30.6	30.6	30.6	32.851	0	29.609	176780000	42	6	6	5	5	6	4	4	6	6	6	4	6	6	6	5	5	6	4	4	6	6	6	4	6	24.0566	23.973	24.0259	24.0444	24.0478	24.3511	24.1795	24.3283
	0.348775	0.158672	Q8R191	Q8R191	Synaptogyrin-3	Syngr3	2	2	2	9.6	9.6	9.6	24.561	0	11.845	257320000	50	2	2	2	2	2	2	2	2	2	2	2	2	2	2	2	2	2	2	2	2	2	2	2	2	25.1051	24.6985	24.4804	24.6896	24.5863	24.5321	24.8384	24.4269
	1.605	-0.895714	Q8R1B4;M0QWV3	Q8R1B4;M0QWV3	Eukaryotic translation initiation factor 3 subunit C	Eif3c;G730046D07Rik	4	4	4	6.6	6.6	6.6	105.53	0	12.53	60058000	11	4	3	4	4	3	3	3	2	4	4	3	4	4	3	4	4	3	3	3	2	4	4	3	4	22.2754	22.2332	21.5176	23.0447	22.8428	22.8258	22.6204	22.7508
	0.54503	0.448742	Q8R1I1	Q8R1I1	Cytochrome b-c1 complex subunit 9	Uqcr10	2	2	2	37.5	37.5	37.5	7.4454	0	54.287	360260000	105	2	2	2	2	2	2	2	2	2	2	2	2	2	2	2	2	2	2	2	2	2	2	2	2	25.5095	25.3286	24.8295	25.1174	24.1721	25.0318	25.1487	25.2127
	0.417866	0.318754	Q8R1Q8	Q8R1Q8	Cytoplasmic dynein 1 light intermediate chain 1	Dync1li1	11	11	11	33.8	33.8	33.8	56.614	0	51.37	189520000	78	9	8	6	8	7	8	8	8	7	9	5	6	9	8	6	8	7	8	8	8	7	9	5	6	24.2991	24.3208	24.5984	24.6843	23.6423	23.9354	24.1469	24.0939
	0.295703	-0.114267	Q8R2R9;Q9JKC8;D3YWU3;D3YXV9;A0A286YDZ6;H7BWY2	Q8R2R9	AP-3 complex subunit mu-2	Ap3m2	10	10	10	34	34	34	46.916	0	30.248	149390000	33	9	7	7	8	6	6	7	7	8	8	7	7	9	7	7	8	6	6	7	7	8	8	7	7	23.8281	23.7404	23.8738	23.7056	24.2181	23.8615	23.6888	23.9617
	0.436903	0.0908286	Q8R317-2;Q8R317;A0A286YE09	Q8R317-2;Q8R317	Ubiquilin-1	Ubqln1	8	8	5	24.2	24.2	16.1	58.677	0	96.077	216600000	64	5	6	7	7	6	6	5	5	7	7	7	6	3	4	5	5	4	4	3	3	5	4	5	4	24.4266	24.3685	24.3058	24.405	24.2996	24.1238	24.5312	24.4371
	0.577816	-0.137709	Q8R3P0;V9GXG0;B0QZP3;D6RJ20	Q8R3P0;V9GXG0	Aspartoacylase	Aspa	6	6	6	38.1	38.1	38.1	35.344	0	28.808	728760000	50	5	3	6	4	5	5	5	5	5	5	4	3	5	3	6	4	5	5	5	5	5	5	4	3	25.9392	26.2291	26.1437	26.1192	26.3222	26.2837	25.9821	26.4815
	0.267156	0.0812365	Q8R464	Q8R464	Cell adhesion molecule 4	Cadm4	7	7	7	27.3	27.3	27.3	42.723	0	37.433	211670000	43	6	5	5	5	5	4	4	5	5	6	4	6	6	5	5	5	5	4	4	5	5	6	4	6	24.5888	24.2672	24.4388	24.2594	24.5065	24.2852	24.4675	24.1785
	0.810689	-0.371181	Q8R4N0	Q8R4N0	Citrate lyase subunit beta-like protein, mitochondrial	Clybl	6	6	6	26.6	26.6	26.6	37.548	0	31.28	71165000	11	3	2	4	4	4	5	5	4	3	5	3	4	3	2	4	4	4	5	5	4	3	5	3	4	22.1992	22.378	22.5233	22.9955	22.3672	22.8512	23.0993	22.1647
	0.133671	0.0599893	Q8R570;B2FDF6;Q8R570-2;I7HFU4;I7HPB1;J3JS29	Q8R570;B2FDF6;Q8R570-2	Synaptosomal-associated protein 47	Snap47	12	12	12	39.5	39.5	39.5	46.524	0	69.133	220460000	55	9	10	11	9	7	9	10	11	11	10	11	10	9	10	11	9	7	9	10	11	11	10	11	10	24.3671	24.5744	24.5874	24.5293	24.6588	24.1609	24.6805	24.5145
	0.362292	-0.0628363	Q8R5C5;E0CZD4;E0CYB4	Q8R5C5;E0CZD4;E0CYB4	Beta-centractin	Actr1b	10	10	4	43.9	43.9	22.1	42.281	0	93.181	662830000	186	9	8	8	8	8	8	9	10	8	10	7	10	4	3	3	3	3	3	4	4	3	4	3	4	25.9509	25.9115	25.9007	25.9291	26.1242	25.8983	26.0227	26.1325
	0.0221652	-0.00752004	Q8R5H6	Q8R5H6	Wiskott-Aldrich syndrome protein family member 1	Wasf1	13	13	12	34.3	34.3	32	61.508	0	71.44	513980000	82	11	10	9	11	10	8	8	10	11	11	9	10	10	9	8	10	9	8	8	9	10	10	8	9	25.8649	25.6914	25.6292	25.598	25.9013	25.7089	25.6343	25.6111
	0.390956	0.128255	Q8R5J9	Q8R5J9	PRA1 family protein 3	Arl6ip5	4	4	4	21.3	21.3	21.3	21.557	0	47.115	136100000	38	3	3	4	3	4	3	4	4	4	4	3	4	3	3	4	3	4	3	4	4	4	4	3	4	23.8675	23.9082	23.6618	23.7694	23.8275	23.4558	23.7392	23.7628
	0.59918	-0.154139	Q8R5L1;O35658	Q8R5L1;O35658	Complement component 1 Q subcomponent-binding protein, mitochondrial	C1qbp	4	4	4	31.2	31.2	31.2	31.025	0	88.021	575840000	117	4	4	4	4	4	3	4	4	4	3	4	4	4	4	4	4	4	3	4	4	4	3	4	4	25.4289	25.6643	25.7087	25.777	25.8732	25.6141	25.9472	26.0733
	0.166155	-0.0476011	Q8VCD6	Q8VCD6	Receptor expression-enhancing protein 2	Reep2	1	1	1	9.4	9.4	9.4	28.436	0	6.0238	42486000	19	1	1	1	1	1	1	1	1	1	1	1	1	1	1	1	1	1	1	1	1	1	1	1	1	21.9895	21.7421	21.7998	21.7367	21.9517	21.9857	22.047	22.0629
	0.464831	-0.151814	Q921H8;Q8VCH0;H3BJZ9;H3BKL5;H3BKA1	Q921H8;Q8VCH0;H3BJZ9;H3BKL5	3-ketoacyl-CoA thiolase A, peroxisomal;3-ketoacyl-CoA thiolase B, peroxisomal	Acaa1a;Acaa1b	4	4	4	17.2	17.2	17.2	43.953	0	12.097	73274000	14	4	4	4	3	2	2	3	4	4	4	4	3	4	4	4	3	2	2	3	4	4	4	4	3	22.7984	22.4769	22.8165	22.8055	23.0188	22.7229	22.894	22.9124
	1.83598	0.508674	Q8VCT3;E9PYF1	Q8VCT3;E9PYF1	Aminopeptidase B	Rnpep	7	7	7	18.6	18.6	18.6	72.415	0	48.532	186620000	26	6	5	4	4	5	3	3	4	6	4	6	6	6	5	4	4	5	3	3	4	6	4	6	6	24.299	24.5736	24.2982	24.0349	23.8584	23.7515	24.1307	24.0107
	0.466888	-0.111029	Q8VCW8	Q8VCW8	Acyl-CoA synthetase family member 2, mitochondrial	Acsf2	9	9	9	26.7	26.7	26.7	67.95	0	28.742	118050000	14	7	7	6	7	6	5	5	5	7	7	4	6	7	7	6	7	6	5	5	5	7	7	4	6	23.6008	23.5752	23.4555	23.6813	23.8005	23.4828	23.2664	23.269
	0.949225	-0.176991	Q8VD37;Q8VD37-8;Q8VD37-6;Q8VD37-4;Q8VD37-3;Q8VD37-2;F7CPX0;Q8VD37-5	Q8VD37;Q8VD37-8;Q8VD37-6;Q8VD37-4;Q8VD37-3;Q8VD37-2;F7CPX0	SH3-containing GRB2-like protein 3-interacting protein 1	Sgip1	12	12	12	28.5	28.5	28.5	86.062	0	69.31	351640000	83	9	12	10	10	11	9	6	7	10	10	10	9	9	12	10	10	11	9	6	7	10	10	10	9	24.804	25.018	24.961	24.9943	25.1975	25.1222	25.1514	25.219
	0.0181363	-0.00973256	Q8VDD5;A0A2R8W6V7;A0A2R8VKI5	Q8VDD5	Myosin-9	Myh9	25	17	16	19.5	13.7	12.9	226.37	0	80.178	197520000	42	13	12	11	12	14	9	7	10	11	10	12	11	12	11	10	11	13	8	6	9	10	9	11	10	24.3753	24.5074	24.239	24.0727	24.4692	24.6091	24.2055	24.2512
	1.45081	-0.243083	Q8VDM4	Q8VDM4	26S proteasome non-ATPase regulatory subunit 2	Psmd2	10	10	10	18.1	18.1	18.1	100.2	0	46.529	196970000	56	9	9	9	9	8	7	7	9	8	10	7	10	9	9	9	9	8	7	7	9	8	10	7	10	24.0519	24.208	24.1246	24.2595	24.375	24.4792	24.3554	24.2633
	0.324049	-0.104726	Q8VDM6-3;Q8VDM6	Q8VDM6-3;Q8VDM6	Heterogeneous nuclear ribonucleoprotein U-like protein 1	Hnrnpul1	1	1	1	4.1	4.1	4.1	38.732	0.0013705	3.0808	169010000	131	1	1	1	1	1	1	1	1	1	1	1	1	1	1	1	1	1	1	1	1	1	1	1	1	23.627	23.4895	23.7408	23.9448	23.5937	23.633	24.1688	23.7643
	1.9788	-0.164658	Q8VDN2	Q8VDN2	Sodium/potassium-transporting ATPase subunit alpha-1	Atp1a1	33	19	19	41.5	25	25	112.98	0	296.29	2570900000	505	17	15	18	17	16	18	16	17	18	16	17	16	17	15	18	17	16	18	16	17	18	16	17	16	27.808	27.859	27.8561	28.0473	28.0276	27.9421	28.1406	28.0098
	0.908235	0.266583	Q8VE47;F6VRI6;A0A1L1SSH6;D6RH76	Q8VE47	Ubiquitin-like modifier-activating enzyme 5	Uba5	4	4	4	19.9	19.9	19.9	44.789	0	36.35	67378000	10	4	3	4	3	3	1	2	3	3	2	1	3	4	3	4	3	3	1	2	3	3	2	1	3	22.7282	22.8831	22.6425	22.693	22.4747	22.2862	23.0096	22.7446
	0.585275	0.129073	Q8VED9	Q8VED9	Galectin-related protein	Lgalsl	4	4	4	30.8	30.8	30.8	18.955	0	44.352	205210000	61	3	3	3	3	3	4	3	3	4	3	4	3	3	3	3	3	3	4	3	3	4	3	4	3	24.4122	24.1198	24.3107	24.0582	24.1778	24.2195	24.3539	24.6604
	0.0495446	0.0457109	Q8VEH5	Q8VEH5	EPM2A-interacting protein 1	Epm2aip1	7	7	7	20.1	20.1	20.1	70.095	0	19.427	100880000	19	5	5	3	4	5	2	5	6	4	4	3	3	5	5	3	4	5	2	5	6	4	4	3	3	23.7071	23.1301	23.1919	23.2836	23.7517	22.8568	23.65	23.0494
	0.191089	-0.0586789	Q8VEK3;Q8VEK3-2	Q8VEK3;Q8VEK3-2	Heterogeneous nuclear ribonucleoprotein U	Hnrnpu	13	13	13	28.5	28.5	28.5	87.917	0	105.36	960520000	238	12	12	12	11	10	10	12	11	12	13	13	10	12	12	12	11	10	10	12	11	12	13	13	10	26.4586	26.5899	26.4935	26.7943	26.4548	26.469	26.6245	26.4719
	0.785495	0.115721	Q8VEM8;G5E902	Q8VEM8;G5E902	Phosphate carrier protein, mitochondrial	Slc25a3	14	14	14	41.7	41.7	41.7	39.632	0	200.76	2769800000	706	13	13	13	12	13	13	13	14	12	12	12	13	13	13	13	12	13	13	13	14	12	12	12	13	28.1825	28.0714	28.2166	27.938	28.1039	28.0814	28.0108	28.0312
	0.337304	-0.158536	Q8VHI6	Q8VHI6	Wiskott-Aldrich syndrome protein family member 3	Wasf3	6	6	6	21	21	21	55.203	0	20.063	78639000	12	4	5	5	4	3	3	3	6	4	5	6	1	4	5	5	4	3	3	3	6	4	5	6	1	22.9925	22.7828	22.9901	23.2159	23.3037	22.7214	22.9766	22.8512
	0.839394	-0.156897	Q8VIJ6	Q8VIJ6	Splicing factor, proline- and glutamine-rich	Sfpq	6	6	6	11.2	11.2	11.2	75.441	0	51.803	340240000	58	6	6	5	6	6	5	6	5	6	5	6	6	6	6	5	6	6	5	6	5	6	5	6	6	25.0578	24.8206	24.9387	25.0091	25.1927	25.086	25.1843	25.025
	0.0679062	0.0424786	S4R225;Q91V09;A2AC24	S4R225;Q91V09;A2AC24	WD repeat-containing protein 13	Wdr13	4	4	4	18.8	18.8	18.8	43.004	0	8.383	63879000	5	3	3	3	4	4	3	3	4	3	3	3	2	3	3	3	4	4	3	3	4	3	3	3	2	23.0771	22.5697	22.3575	22.5744	22.7175	22.5849	22.1907	22.9759
	1.08267	0.150508	Q91V12-2;E9PYH2;Q91V12-4;Q91V12;Q91V12-3	Q91V12-2;E9PYH2;Q91V12-4;Q91V12;Q91V12-3	Cytosolic acyl coenzyme A thioester hydrolase	Acot7	10	10	10	41.1	41.1	41.1	37.555	0	101.84	955410000	224	8	8	8	9	8	7	9	7	8	8	6	8	8	8	8	9	8	7	9	7	8	8	6	8	26.6764	26.8343	26.6349	26.6122	26.5487	26.5332	26.3811	26.483
	0.0757231	-0.023496	Q91V14-2;Q91V14;A0A076FR46;Q6P6P5;Q3V0N8;Q924N4-2;Q924N4;A0A0J9YU26;A0A0J9YV84;F8WIJ0;Q9JIS8	Q91V14-2;Q91V14;A0A076FR46	Solute carrier family 12 member 5	Slc12a5	22	22	22	26.4	26.4	26.4	123.59	0	201.91	1143000000	346	19	19	19	18	17	20	18	19	17	20	17	19	19	19	19	18	17	20	18	19	17	20	17	19	26.6632	26.9914	26.7814	26.8032	26.937	26.7664	26.7548	26.8601
	0.0398025	-0.0178299	Q91V41;Q50HX3;A0A2R8VHW9	Q91V41;Q50HX3	Ras-related protein Rab-14	Rab14	8	8	8	52.6	52.6	52.6	23.897	0	107.74	903730000	87	7	7	8	7	8	7	8	7	6	6	8	8	7	7	8	7	8	7	8	7	6	6	8	8	26.461	26.4865	26.1877	26.6287	26.3198	26.2401	26.5795	26.3959
	0.358649	-0.103189	Q91V61;Q91V61-2;Q3U4F0	Q91V61;Q91V61-2;Q3U4F0	Sideroflexin-3	Sfxn3	12	12	11	55.1	55.1	49.2	35.406	0	169.4	1225200000	349	11	11	11	11	12	11	11	11	11	11	11	11	10	10	10	10	11	10	10	10	10	10	10	10	26.9356	26.6366	26.731	26.8495	27.0209	26.7424	26.8971	26.6918
	0.194168	-0.0858167	Q91V77;P56565;D3YUT6	Q91V77;P56565	Protein S100;Protein S100-A1	S100a1	3	3	3	41.5	41.5	41.5	10.505	0	46.669	276080000	28	2	2	2	3	3	1	2	2	2	2	3	3	2	2	2	3	3	1	2	2	2	2	3	3	24.5608	24.4719	24.9906	24.6991	24.8717	24.7099	24.5948	24.7348
	0.762915	-0.0823886	Q91V89	Q91V89		Ppp2r5d	13	13	8	29	29	17.5	68.994	0	51.344	221820000	61	11	11	7	10	10	7	8	11	9	12	10	9	6	7	4	6	7	4	5	8	7	8	6	6	24.4421	24.2814	24.4074	24.4497	24.4505	24.4779	24.2778	24.6926
	0.640241	-0.122705	Q91VA7;V9GXV0	Q91VA7	Isocitrate dehydrogenase [NAD] subunit, mitochondrial	Idh3b	16	16	16	48.7	48.7	48.7	42.194	0	237.58	2265200000	394	14	14	13	15	14	15	16	16	15	15	16	15	14	14	13	15	14	15	16	16	15	15	16	15	27.753	27.5664	27.767	27.7993	27.7295	27.9258	27.8018	27.7521
	0.381855	-0.102573	Q91VB8;P01942;CON__P01966;A7M7S6;P06467	Q91VB8;P01942	Hemoglobin subunit alpha	haemaglobin alpha 2;Hba	9	9	9	83.8	83.8	83.8	15.112	0	323.31	21346000000	1518	9	9	9	9	9	9	9	9	9	9	9	9	9	9	9	9	9	9	9	9	9	9	9	9	30.6189	30.9736	30.8862	30.8855	31.0023	30.8986	30.823	30.9875
	0.148688	0.0165958	Q91VD9;A0A087WQR0;A0A087WQ77;A0A087WP77;A0A087WSU3;A0A087WR47	Q91VD9	NADH-ubiquinone oxidoreductase 75 kDa subunit, mitochondrial	Ndufs1	28	28	28	58.3	58.3	58.3	79.776	0	323.31	2136700000	516	24	26	25	25	25	25	24	24	25	27	24	24	24	26	25	25	25	25	24	24	25	27	24	24	27.7261	27.7849	27.6622	27.6779	27.7501	27.6954	27.7083	27.7904
	1.10183	-0.288258	Q91VM9;D3Z636;Q91VM9-2;G8JL76	Q91VM9;D3Z636;Q91VM9-2;G8JL76	Inorganic pyrophosphatase 2, mitochondrial	Ppa2	8	8	8	33.6	33.6	33.6	38.114	0	32.181	192830000	71	8	7	7	8	7	5	7	7	7	7	6	7	8	7	7	8	7	5	7	7	7	7	6	7	23.8999	24.111	24.137	24.1835	24.518	24.3111	24.1966	24.4737
	0.211045	-0.064127	Q91VR5;A0A1Y7VM48	Q91VR5	ATP-dependent RNA helicase DDX1	Ddx1	11	11	11	26.1	26.1	26.1	82.499	0	45.932	237680000	61	9	9	10	11	10	4	8	10	10	8	9	7	9	9	10	11	10	4	8	10	10	8	9	7	24.5708	24.4086	24.413	24.4964	24.724	24.3644	24.3827	24.7313
	0.0452417	0.0352192	Q91VR8	Q91VR8	Protein BRICK1	Brk1	3	3	3	42.7	42.7	42.7	8.7608	0	18.322	110250000	48	3	3	3	2	3	2	2	3	3	3	3	3	3	3	3	2	3	2	2	3	3	3	3	3	23.3594	23.9831	23.2231	23.6793	23.5328	23.2479	23.2828	23.3696
	0.203567	-0.202382	Q91VW3	Q91VW3	SH3 domain-binding glutamic acid-rich-like protein 3	Sh3bgrl3	2	2	2	20.4	20.4	20.4	10.477	0	89.189	323980000	53	2	2	2	2	2	2	2	2	2	2	2	2	2	2	2	2	2	2	2	2	2	2	2	2	24.4941	25.2908	24.1675	24.9321	25.135	24.4925	25.056	25.3693
	0.324867	-0.0685031	Q91WD5;D3YXT0;A0A0A6YW30;A0A0A6YXD3	Q91WD5;D3YXT0	NADH dehydrogenase [ubiquinone] iron-sulfur protein 2, mitochondrial	Ndufs2	16	16	16	44.9	44.9	44.9	52.625	0	126.75	784240000	190	15	15	12	12	14	13	14	12	12	12	12	14	15	15	12	12	14	13	14	12	12	12	12	14	26.1102	26.1058	26.3124	26.1383	26.2877	26.3078	26.1924	26.4234
	0.116003	-0.0544319	Q91WS0	Q91WS0	CDGSH iron-sulfur domain-containing protein 1	Cisd1	5	5	5	44.4	44.4	44.4	12.097	0	120.6	751720000	151	5	5	5	5	5	5	5	5	5	5	5	5	5	5	5	5	5	5	5	5	5	5	5	5	26.2466	26.2161	26.3565	25.9999	26.5275	26.4551	25.9653	26.3055
	0.616533	-0.134952	Q91X97;D3YVA2;D3Z2Z8;D3Z1M0	Q91X97;D3YVA2;D3Z2Z8;D3Z1M0	Neurocalcin-delta	Ncald	9	6	6	52.8	39.4	39.4	22.245	0	73.85	1024000000	132	5	5	5	5	5	6	5	5	5	5	5	5	5	5	5	5	5	6	5	5	5	5	5	5	26.8187	26.5557	26.5317	26.7376	26.7334	26.84	26.5792	26.5783
	0.302385	0.117122	Q91XH5;G3UXX3;Q64105;G3UZ79	Q91XH5;G3UXX3;Q64105	Sepiapterin reductase	Spr	8	8	8	43.9	43.9	43.9	27.928	0	47.04	213260000	89	7	7	7	8	7	8	7	7	7	7	7	8	7	7	7	8	7	8	7	7	7	7	7	8	24.4234	24.6189	24.5671	24.4376	24.663	24.1574	24.1587	24.444
	1.52988	-0.305643	Q91XM9-3;Q91XM9-6;Q91XM9-8;Q91XM9;Q91XM9-2;Q91XM9-4;Q91XM9-7;D3YUZ8;E9Q2L2;D3YWU0;Q91XM9-5	Q91XM9-3;Q91XM9-6;Q91XM9-8;Q91XM9;Q91XM9-2;Q91XM9-4;Q91XM9-7;D3YUZ8;E9Q2L2;D3YWU0	Disks large homolog 2	Dlg2	12	11	10	26.7	23.5	22	87.789	0	68.397	354660000	109	9	8	9	10	8	10	7	7	8	10	10	9	8	7	8	9	7	9	6	6	7	9	9	8	25.0457	25.1481	25.0652	25.2786	25.5623	25.3351	24.6109	25.3539
	0.161807	-0.182364	Q91XU3	Q91XU3	Phosphatidylinositol 5-phosphate 4-kinase type-2 gamma	Pip4k2c	2	2	2	6.9	6.9	6.9	47.335	0	15.195	48119000	15	2	2	2	2	2	1	1	2	2	2	2	2	2	2	2	2	2	1	1	2	2	2	2	2	21.9555	22.8901	21.6634	22.2816	22.7391	22.0355	22.1724	22.3078
	0.568511	-0.136201	Q91XV3	Q91XV3	Brain acid soluble protein 1	Basp1	8	8	8	62.4	62.4	62.4	22.086	0	288.39	4768800000	1454	8	7	8	8	8	8	8	7	7	8	8	8	8	7	8	8	8	8	8	7	7	8	8	8	28.2442	28.0945	28.0403	28.324	28.0903	28.3734	28.3016	28.0978
	0.553042	-0.364751	Q91YD9	Q91YD9	Neural Wiskott-Aldrich syndrome protein	Wasl	4	4	4	16	16	16	54.274	0	14.012	90162000	20	3	1	3	4	3	2	4	2	2	3	3	3	3	1	3	4	3	2	4	2	2	3	3	3	22.5811	22.6504	23.2444	22.9193	23.0645	23.5863	22.8986	23.1784
	0.543612	-0.418242	Q91YJ2	Q91YJ2	Sorting nexin-4	Snx4	2	2	2	5.3	5.3	5.3	51.777	0	15.748	32074000	12	2	2	2	2	1	1	1	2	2	2	2	2	2	2	2	2	1	1	1	2	2	2	2	2	20.9591	21.8378	21.2674	21.4328	22.1904	21.6959	20.8777	21.9849
	0.0450312	0.022007	Q91YQ5	Q91YQ5	Dolichyl-diphosphooligosaccharide--protein glycosyltransferase subunit 1	Rpn1	6	6	6	14.5	14.5	14.5	68.527	0	16.77	104500000	17	4	6	5	4	4	4	3	3	4	5	3	3	4	6	5	4	4	4	3	3	4	5	3	3	23.2509	23.4225	23.1207	23.1344	23.5247	23.069	23.8382	23.3986
	0.0168629	0.0103213	Q91YR1	Q91YR1	Twinfilin-1	Twf1	4	3	3	13.7	11.7	11.7	40.079	0	12.59	86708000	35	3	3	3	3	3	3	3	3	3	3	3	3	3	3	3	3	3	3	3	3	3	3	3	3	23.1275	23.0516	23.3896	22.8339	23.2977	23.4061	22.8603	22.747
	0.695458	-0.152323	Q91Z31;Q91Z31-2;A0A0G2JGW0;Q3V328;A0A0G2JFV8	Q91Z31;Q91Z31-2;A0A0G2JGW0	Polypyrimidine tract-binding protein 2	Ptbp2	5	5	5	24.1	24.1	24.1	57.488	0	55.534	90465000	33	5	5	4	5	4	1	2	5	5	5	2	2	5	5	4	5	4	1	2	5	5	5	2	2	23.0217	22.9378	23.1953	23.0814	23.2284	23.302	23.1175	23.2188
	0.220909	-0.111292	Q91Z53;D6REG4;B1AXQ0	Q91Z53;D6REG4	Glyoxylate reductase/hydroxypyruvate reductase	Grhpr	7	7	7	31.1	31.1	31.1	35.328	0	21.716	214160000	47	7	6	6	5	5	4	5	6	5	5	5	7	7	6	6	5	5	4	5	6	5	5	5	7	24.259	24.1554	24.419	24.1112	24.3277	24.7285	24.4608	24.4537
	0.153969	0.0672595	Q91ZA3;H3BL62;D3YWM4	Q91ZA3	Propionyl-CoA carboxylase alpha chain, mitochondrial	Pcca	9	9	9	18.8	18.8	18.8	79.921	0	39.264	142570000	57	6	5	6	6	6	6	6	7	7	9	6	5	6	5	6	6	6	6	6	7	7	9	6	5	23.544	24.0731	23.8002	23.6245	23.811	23.7801	23.832	23.865
	0.347088	0.0960687	Q91ZJ5-2;Q91ZJ5	Q91ZJ5-2;Q91ZJ5	UTP--glucose-1-phosphate uridylyltransferase	Ugp2	7	7	7	18.5	18.5	18.5	55.715	0	39.28	200690000	44	6	4	5	5	6	5	6	5	6	6	4	6	6	4	5	5	6	5	6	5	6	6	4	6	24.3562	24.5678	24.2929	24.3584	24.4155	24.1548	24.2534	24.2921
	0.486088	0.171897	Q91ZP9;Q91ZP9-2	Q91ZP9;Q91ZP9-2	N-terminal EF-hand calcium-binding protein 2	Necab2	6	6	6	27.5	27.5	27.5	43.44	0	29.143	114600000	31	5	4	5	5	5	6	3	4	3	6	5	5	5	4	5	5	5	6	3	4	3	6	5	5	23.5198	23.8235	23.4586	23.6368	23.3048	23.3446	23.5129	23.0956
	0.539583	-0.32519	Q91ZZ3	Q91ZZ3	Beta-synuclein	Sncb	5	3	3	39.1	30.8	30.8	14.051	0	245.12	2360000000	138	3	3	3	3	3	3	3	3	3	3	3	3	3	3	3	3	3	3	3	3	3	3	3	3	27.4436	28.1623	27.3362	27.9832	28.0698	27.8647	28.0849	27.8161
	0.343981	-0.0502084	Q920I9-2;Q920I9	Q920I9-2;Q920I9	WD repeat-containing protein 7	Wdr7	29	29	29	33.5	33.5	33.5	160.32	0	195.95	913360000	247	25	24	23	26	23	22	25	25	22	26	23	23	25	24	23	26	23	22	25	25	22	26	23	23	26.4495	26.5374	26.4975	26.4552	26.6444	26.5354	26.4597	26.4945
	0.697671	0.188311	Q920P5;A0A0G2JGN7;Q920P5-2	Q920P5	Adenylate kinase isoenzyme 5	Ak5	7	7	7	16.5	16.5	16.5	63.322	0	28.735	161440000	60	7	7	7	6	7	6	5	6	7	5	6	5	7	7	7	6	7	6	5	6	7	5	6	5	24.22	24.2101	23.994	24.0926	24.0035	23.7629	23.9899	24.0258
	1.45708	0.376176	Q921M7;A0A2I3BRN5;A0A2I3BPH9;A0A2I3BQK1	Q921M7;A0A2I3BRN5	Protein FAM49B	Fam49b	9	8	8	46.3	42.3	42.3	36.776	0	63.589	241530000	65	7	4	7	5	8	5	4	6	5	6	6	6	7	4	7	5	8	5	4	6	5	6	6	6	24.865	24.7512	24.8538	24.5591	24.5637	24.2186	24.6629	24.501
	0.0696246	0.0419922	Q922B2;Q8BJY7	Q922B2	Aspartate--tRNA ligase, cytoplasmic	Dars	11	11	11	25.7	25.7	25.7	57.147	0	29.275	242660000	45	8	10	9	9	8	9	9	9	8	10	9	8	8	10	9	9	8	9	9	9	8	10	9	8	24.6087	24.5003	24.0532	24.5706	24.3261	24.1396	24.7567	24.9639
	0.504405	-0.16516	Q922D8;A0A1W2P733;A0A1W2P7L5	Q922D8;A0A1W2P733	C-1-tetrahydrofolate synthase, cytoplasmic;Methylenetetrahydrofolate dehydrogenase;Methenyltetrahydrofolate cyclohydrolase;Formyltetrahydrofolate synthetase;C-1-tetrahydrofolate synthase, cytoplasmic, N-terminally processed	Mthfd1	9	9	9	14.1	14.1	14.1	101.2	0	25.817	116550000	23	7	8	7	5	6	3	6	6	6	8	6	7	7	8	7	5	6	3	6	6	6	8	6	7	23.5159	23.2775	23.5397	23.3892	23.7837	23.6558	23.555	23.61
	1.0842	0.245937	Q922H2	Q922H2	[Pyruvate dehydrogenase (acetyl-transferring)] kinase isozyme 3, mitochondrial	Pdk3	5	5	5	19	19	19	47.922	0	23.665	79465000	23	4	2	4	4	3	3	2	4	3	3	3	3	4	2	4	4	3	3	2	4	3	3	3	3	22.9203	22.9627	23.2171	22.8148	22.8621	22.6854	23.3893	23.1944
	0.261644	0.136779	Q922Q1;E0CZH6	Q922Q1;E0CZH6	Mitochondrial amidoxime reducing component 2	2018-03-02	8	8	8	32	32	32	38.194	0	36.004	165060000	70	7	6	8	7	7	4	6	7	8	7	8	7	7	6	8	7	7	4	6	7	8	7	8	7	23.9821	23.9287	24.1017	24.1195	23.4679	24.0148	24.0722	24.1139
	0.81925	-0.195926	Q922Q8	Q922Q8	Leucine-rich repeat-containing protein 59	Lrrc59	5	5	5	24.8	24.8	24.8	34.877	0	14.827	76534000	29	5	4	4	5	4	3	4	4	4	4	3	4	5	4	4	5	4	3	4	4	4	4	3	4	22.5868	22.9404	22.6754	22.9928	22.8948	22.9028	22.5472	22.6442
	0.488968	-0.281911	Q922Y1	Q922Y1	UBX domain-containing protein 1	Ubxn1	3	3	3	27.3	27.3	27.3	33.572	0	19.22	69206000	19	2	2	3	3	2	2	3	2	2	3	3	2	2	2	3	3	2	2	3	2	2	3	3	2	22.7797	22.3025	22.9614	22.8794	22.7441	23.2659	22.6187	22.6282
	1.15081	0.246647	Q924B0;O55023;Q80ZJ2;A0A0A6YW07;D3Z703	Q924B0;O55023;Q80ZJ2	Inositol monophosphatase 1	Impa1	8	8	8	34.7	34.7	34.7	30.429	0	39.84	338330000	118	8	8	7	7	7	8	8	7	8	7	8	7	8	8	7	7	7	8	8	7	8	7	8	7	25.2115	25.1137	25.3372	24.8876	25.1283	24.9065	24.9792	25.0191
	0.330765	0.0429942	Q924M7;F6Q3K8	Q924M7	Mannose-6-phosphate isomerase	Mpi	7	7	7	27.4	27.4	27.4	46.575	0	18.346	134860000	15	7	4	4	5	5	2	4	5	6	5	4	4	7	4	4	5	5	2	4	5	6	5	4	4	23.8265	23.8241	23.7844	23.8479	23.6713	23.7868	23.8645	23.7215
	0.27461	-0.225386	Q99J08	Q99J08	SEC14-like protein 2	Sec14l2	4	4	4	15.1	15.1	15.1	46.3	0	20.479	72647000	15	2	3	4	4	2	2	4	2	3	3	2	3	2	3	4	4	2	2	4	2	3	3	2	3	23.1628	22.2954	22.2292	22.8726	22.9661	22.525	22.4004	22.6194
	1.47728	-0.820745	Q99J99;A0A2R8VHT1;A0A2R8VHE5	Q99J99;A0A2R8VHT1	3-mercaptopyruvate sulfurtransferase	Mpst	5	5	5	25.3	25.3	25.3	33.097	0	13.232	65370000	5	5	3	4	4	3	3	4	3	3	4	4	4	5	3	4	4	3	3	4	3	3	4	4	4	22.175	22.3827	22.4254	22.6749	23.4986	23.2719	22.5163	22.731
	0.658579	0.219934	Q99JI4;A0A286YDW8	Q99JI4;A0A286YDW8	26S proteasome non-ATPase regulatory subunit 6	Psmd6	7	7	7	20.1	20.1	20.1	45.536	0	33.789	61855000	13	6	5	6	6	6	5	4	4	5	5	5	4	6	5	6	6	6	5	4	4	5	5	5	4	22.4781	22.7989	22.8129	22.2755	22.529	22.6257	22.4406	22.4941
	0.211457	-0.0750561	Q99JI6;A0A1W2P777	Q99JI6	Ras-related protein Rap-1b	Rap1b	5	5	2	33.2	33.2	15.2	20.825	0	43.978	464880000	117	5	5	5	5	5	5	5	5	5	4	5	5	2	2	2	2	2	2	2	2	2	1	2	2	25.7306	25.3787	25.6092	25.4862	25.8014	25.656	25.4409	25.3903
	0.773804	-0.204142	Q99JP7;H3BKA5;A2AQN2	Q99JP7	Gamma-glutamyltransferase 7;Gamma-glutamyltransferase 7 heavy chain;Gamma-glutamyltransferase 7 light chain	Ggt7	8	8	8	17.1	17.1	17.1	70.251	0	105.61	760520000	77	5	5	6	5	6	4	6	6	6	4	6	4	5	5	6	5	6	4	6	6	6	4	6	4	25.499	25.4054	25.7174	25.6057	25.879	25.7494	25.7251	25.6256
	0.485727	-0.0951131	Q99JR1	Q99JR1	Sideroflexin-1	Sfxn1	9	8	8	44.7	38.8	38.8	35.649	0	70.739	261840000	86	6	7	7	7	7	6	6	7	6	7	6	7	6	7	7	7	7	6	6	7	6	7	6	7	24.457	24.4361	24.6976	24.6534	24.603	24.6196	24.5402	24.8629
	1.06173	-0.221418	Q99JY0;D3YXU1	Q99JY0	Trifunctional enzyme subunit beta, mitochondrial;3-ketoacyl-CoA thiolase	Hadhb	10	10	10	32.6	32.6	32.6	51.386	0	52.576	388490000	69	9	10	9	10	8	9	9	7	9	8	9	8	9	10	9	10	8	9	9	7	9	8	9	8	25.0182	25.0636	25.0584	25.1927	25.4606	25.1512	25.1854	25.3737
	0.151875	-0.031098	Q99JY9;A0A087WRA1;A0A087WQ14;A0A087WP86;A0A087WS98;A0A087WQ83;A0A087WPR6	Q99JY9	Actin-related protein 3	Actr3	20	20	16	70.3	70.3	62.7	47.357	0	279.13	1963000000	518	18	19	18	17	19	18	18	19	18	19	18	19	14	15	14	13	15	14	14	15	14	15	14	15	27.626	27.6067	27.5818	27.5459	27.7856	27.5762	27.641	27.6858
	0.311987	0.299238	Q99JZ4;A0A1W2P869;A0A1W2P6N3;A0A1W2P720;P36536;Q9CQC9	Q99JZ4;A0A1W2P869;A0A1W2P6N3;A0A1W2P720;P36536;Q9CQC9	GTP-binding protein SAR1a;GTP-binding protein SAR1b	Sar1a;Sar1b	6	6	6	44.4	44.4	44.4	22.399	0	21.091	119330000	41	4	3	3	4	4	3	4	5	5	6	3	4	4	3	3	4	4	3	4	5	5	6	3	4	23.7007	24.0668	23.2493	23.6458	22.7498	23.7234	23.4916	23.5749
	0.0438715	0.0245387	Q99K48;Q99K48-2	Q99K48	Non-POU domain-containing octamer-binding protein	Nono	3	3	3	15	15	15	54.54	0	31.54	122770000	47	3	3	3	3	3	3	3	3	3	3	3	2	3	3	3	3	3	3	3	3	3	3	3	2	23.7268	23.7149	23.5784	23.7621	23.897	23.2874	23.8898	23.4405
	0.672146	-0.109048	Q99K85;Q3U6K9;E9Q6P1	Q99K85;Q3U6K9	Phosphoserine aminotransferase	Psat1	11	11	11	37.8	37.8	37.8	40.472	0	52.17	318870000	64	9	11	10	11	10	9	9	10	10	10	10	10	9	11	10	11	10	9	9	10	10	10	10	10	24.8718	24.7638	24.9906	24.9181	25.0271	25.0083	24.7611	25.0313
	0.123498	0.0838	Q99KH8	Q99KH8	Serine/threonine-protein kinase 24;Serine/threonine-protein kinase 24 35 kDa subunit;Serine/threonine-protein kinase 24 12 kDa subunit	Stk24	3	3	3	11.6	11.6	11.6	47.953	0	7.1821	23595000	4	2	2	2	2	1	2	2	2	1	2	1	2	2	2	2	2	1	2	2	2	1	2	1	2	20.9204	21.2134	21.5297	20.9286	21.4848	20.9987	21.0646	21.096
	1.07952	-0.13669	Q99KI0;A0A2R8W744;A0A2R8VHM8	Q99KI0	Aconitate hydratase, mitochondrial	Aco2	36	36	34	59.1	59.1	55.8	85.462	0	323.31	14199000000	1836	36	35	36	36	35	35	34	36	36	36	36	36	34	33	34	34	33	33	32	34	34	34	34	34	30.3345	30.3075	30.317	30.3387	30.5234	30.5069	30.4861	30.4846
	0.220703	-0.10774	Q99KJ8	Q99KJ8	Dynactin subunit 2	Dctn2	11	11	11	44.8	44.8	44.8	44.116	0	169.35	591970000	93	11	8	9	10	8	8	7	9	10	9	10	11	11	8	9	10	8	8	7	9	10	9	10	11	25.5099	25.7544	25.331	25.7779	25.792	25.3486	25.9611	25.9231
	0.0217974	-0.0119597	Q99KP3	Q99KP3	Lambda-crystallin homolog	Cryl1	2	2	2	14.4	14.4	14.4	35.208	0	6.5788	45180000	14	2	2	2	2	2	2	2	1	1	1	1	2	2	2	2	2	2	2	2	1	1	1	1	2	21.9263	22.141	22.1826	21.7748	22.1878	22.3232	22.2709	22.4404
	0.438222	-0.240222	Q99KQ4	Q99KQ4	Nicotinamide phosphoribosyltransferase	Nampt	3	3	3	10.4	10.4	10.4	55.446	0	20.419	83882000	13	3	3	2	2	2	2	1	2	2	2	1	1	3	3	2	2	2	2	1	2	2	2	1	1	23.0978	23.1081	22.7845	23.6362	23.1488	22.926	23.0507	22.8165
	0.17351	-0.0520401	Q99L13	Q99L13	3-hydroxyisobutyrate dehydrogenase, mitochondrial	Hibadh	8	8	8	33.4	33.4	33.4	35.44	0	49.668	157160000	38	6	4	7	5	5	5	6	6	7	7	6	6	6	4	7	5	5	5	6	6	7	7	6	6	23.8902	23.7372	23.8525	24.0728	23.7177	23.8455	24.0973	24.2146
	0.823712	0.374837	Q99LB6-2;Q99LB6;E0CYU5	Q99LB6-2;Q99LB6	Methionine adenosyltransferase 2 subunit beta	Mat2b	4	4	4	23.5	23.5	23.5	36.21	0	8.5568	52051000	4	2	4	4	4	4	4	2	4	3	4	4	4	2	4	4	4	4	4	2	4	3	4	4	4	22.8034	22.6164	22.2696	22.3262	21.9055	22.3332	22.4316	22.5573
	0.154955	0.0554085	Q99LC3;A0A087WR38	Q99LC3	NADH dehydrogenase [ubiquinone] 1 alpha subcomplex subunit 10, mitochondrial	Ndufa10	12	12	12	41.7	41.7	41.7	40.603	0	171.87	1037300000	225	9	10	9	9	9	9	9	11	10	11	10	10	9	10	9	9	9	9	9	11	10	11	10	10	26.7842	26.5318	26.7872	26.4593	26.8171	26.6604	26.7171	26.8439
	0.8116	0.120482	Q99LC5	Q99LC5	Electron transfer flavoprotein subunit alpha, mitochondrial	Etfa	9	9	9	41.4	41.4	41.4	35.009	0	74.996	475880000	89	8	8	8	8	8	7	7	7	9	9	9	9	8	8	8	8	8	7	7	7	9	9	9	9	25.5349	25.5213	25.4298	25.2591	25.4617	25.4038	25.6591	25.7731
	0.1919	0.0799917	Q99LF4	Q99LF4	tRNA-splicing ligase RtcB homolog	Rtcb	7	7	7	20.4	20.4	20.4	55.249	0	24.521	173550000	51	6	6	7	6	7	5	6	6	6	5	5	4	6	6	7	6	7	5	6	6	6	5	5	4	24.306	24.0197	24.2215	23.8925	24.3552	24.0595	24.0729	24.2278
	0.0995054	0.0712573	Q99LG2;E9PV58;Q3TKD0;Q8BFY9-2;Q8BFY9	Q99LG2;E9PV58	Transportin-2	Tnpo2	5	5	5	12.4	12.4	12.4	100.46	0	16.732	64415000	13	3	3	3	4	3	1	5	4	4	4	4	5	3	3	3	4	3	1	5	4	4	4	4	5	22.8706	22.4786	22.4519	22.7228	22.7712	22.0933	22.7913	23.1359
	0.719402	0.328739	Q99LP6	Q99LP6	GrpE protein homolog 1, mitochondrial	Grpel1	2	2	2	12	12	12	24.307	0	5.708	18832000	2	2	1	1	1	2	2	1	1	2	2	1	2	2	1	1	1	2	2	1	1	2	2	1	2	20.9176	21.0024	21.0582	20.3539	21.0512	20.5869	21.3772	20.9068
	0.582006	-0.209794	Q99LR1;Q99LR1-2;D6RFU2	Q99LR1;Q99LR1-2;D6RFU2	Monoacylglycerol lipase ABHD12	Abhd12	8	8	8	30.7	30.7	30.7	45.269	0	39.703	124200000	48	5	7	7	6	7	6	4	6	7	5	6	4	5	7	7	6	7	6	4	6	7	5	6	4	23.4588	23.4702	23.6735	23.4924	23.994	23.7454	23.9097	23.7615
	0.253516	0.0128339	Q99LX0;A2A815;A2A813;A2A817;A2A816	Q99LX0;A2A815;A2A813;A2A817;A2A816	Protein deglycase DJ-1	Park7	9	9	9	64.6	64.6	64.6	20.021	0	139.29	1229600000	263	8	9	9	8	9	8	8	8	8	9	8	8	8	9	9	8	9	8	8	8	8	9	8	8	26.8817	26.8534	26.9024	26.838	26.8823	26.8788	26.8992	27.0095
	0.0454257	0.0222918	Q99M71;A0A1Y7VKS9;Q99M71-2	Q99M71	Mammalian ependymin-related protein 1	Epdr1	5	5	5	23.7	23.7	23.7	25.485	0	14.008	44527000	35	3	2	3	4	4	2	1	3	3	3	3	3	3	2	3	4	4	2	1	3	3	3	3	3	22.4779	22.3306	21.9788	22.2866	22.0864	22.3474	22.0237	21.9895
	0.841914	0.464979	Q99MR8;A0A0G2JF64;A0A0G2JFQ5	Q99MR8	Methylcrotonoyl-CoA carboxylase subunit alpha, mitochondrial	Mccc1	3	3	3	6	6	6	79.343	0	6.9509	60986000	16	3	3	2	3	2	2	3	3	2	3	3	3	3	3	2	3	2	2	3	3	2	3	3	3	22.6237	22.7246	22.7145	22.5519	21.7222	22.3937	22.7697	22.3624
	0.840777	-0.157631	Q99P72;Q99P72-3;Q8BH78;Q8BHF5	Q99P72;Q99P72-3	Reticulon-4	Rtn4	24	24	22	43.5	43.5	41	126.61	0	323.31	1713600000	445	22	21	21	22	21	22	22	21	22	21	21	20	20	19	19	20	19	20	20	19	20	19	19	18	27.3309	27.3182	27.1515	27.5026	27.4756	27.2953	27.395	27.418
	0.144107	0.0449053	Q99PL6-2;Q99PL6;B8JJA4	Q99PL6-2;Q99PL6	UBX domain-containing protein 6	Ubxn6	8	8	8	32.9	32.9	32.9	43.994	0	30.027	193600000	24	7	6	7	8	6	3	3	7	7	8	5	6	7	6	7	8	6	3	3	7	7	8	5	6	24.3242	24.0353	24.3977	24.1398	24.2394	24.2433	24.204	24.1754
	0.240441	-0.102623	Q99PT1	Q99PT1	Rho GDP-dissociation inhibitor 1	Arhgdia	9	9	9	58.3	58.3	58.3	23.407	0	236.14	1956400000	277	8	8	8	8	7	7	8	8	8	9	8	8	8	8	8	8	7	7	8	8	8	9	8	8	27.3568	27.4898	27.7689	27.4209	27.8171	27.6853	27.4862	27.4838
	0.548781	-0.191652	Q99PU5	Q99PU5	Long-chain-fatty-acid--CoA ligase ACSBG1	Acsbg1	10	10	10	18.7	18.7	18.7	80.425	0	24.135	110690000	4	7	7	8	6	6	6	7	6	9	8	5	7	7	7	8	6	6	6	7	6	9	8	5	7	23.0718	23.4413	23.3657	23.6538	23.5097	23.2903	23.0884	23.6099
	0.957009	0.124425	Q9CPP6;D3YTQ8	Q9CPP6;D3YTQ8	NADH dehydrogenase [ubiquinone] 1 alpha subcomplex subunit 5	Ndufa5	4	4	4	51.7	51.7	51.7	13.36	0	20.493	196860000	97	4	3	3	4	3	3	3	3	3	4	3	3	4	3	3	4	3	3	3	3	3	4	3	3	24.2098	24.0994	24.1047	23.9288	24.0129	24.0989	24.1545	24.3365
	0.0305699	-0.0111732	Q9CPQ1	Q9CPQ1	Cytochrome c oxidase subunit 6C	Cox6c	5	5	5	51.3	51.3	51.3	8.4689	0	46.916	1058900000	197	5	5	5	5	5	5	5	5	5	5	5	4	5	5	5	5	5	5	5	5	5	5	5	4	26.7675	26.5302	26.7904	26.526	26.7907	26.805	26.6453	26.5197
	0.0757414	-0.0212911	Q9CPQ3;A0A2R8VHM4;A0A2R8VHJ4	Q9CPQ3;A0A2R8VHM4	Mitochondrial import receptor subunit TOM22 homolog	Tomm22	4	4	4	47.9	47.9	47.9	15.537	0	25.759	39864000	16	1	1	2	1	2	2	3	2	1	2	2	2	1	1	2	1	2	2	3	2	1	2	2	2	21.9545	21.8062	21.8578	21.9987	21.966	21.7176	21.8177	21.9965
	0.176432	0.106399	Q9CPQ8;J3QNM7	Q9CPQ8	ATP synthase subunit g, mitochondrial	Atp5l	4	4	4	48.5	48.5	48.5	11.424	0	24.176	643020000	134	3	4	4	3	4	4	4	4	4	4	4	4	3	4	4	3	4	4	4	4	4	4	4	4	26.4326	25.9309	25.9028	25.8068	25.8578	26.2826	26.1759	25.9369
	0.00854899	0.00432523	Q9CPS6;E9Q7F8;F8WH96	Q9CPS6;E9Q7F8;F8WH96	Histidine triad nucleotide-binding protein 3	Hint3	2	2	2	15.2	15.2	15.2	18.787	0	4.9191	26286000	3	2	2	2	2	1	1	1	2	1	2	2	2	2	2	2	2	1	1	1	2	1	2	2	2	21.2692	21.6488	21.2094	21.2044	21.3819	21.528	21.4369	21.2477
	0.0363305	0.00819079	Q9CPU0	Q9CPU0	Lactoylglutathione lyase	Glo1	8	8	8	46.2	46.2	46.2	20.809	0	57.809	566500000	192	7	8	8	8	8	7	8	8	8	7	8	7	7	8	8	8	8	7	8	8	8	7	8	7	25.8605	25.9057	25.7632	25.9457	25.7248	25.8345	25.7564	25.979
	0.805492	-0.255095	Q9CPU4	Q9CPU4	Microsomal glutathione S-transferase 3	Mgst3	5	5	5	64.7	64.7	64.7	16.958	0	41.473	186020000	53	5	4	4	4	4	3	3	4	3	5	5	5	5	4	4	4	4	3	3	4	3	5	5	5	24.2044	24.2333	23.9981	24.3727	24.6317	24.1967	24.0354	24.35
	0.119526	0.0511621	Q9CPV4;E9Q197;Q9CPV4-2;Q9CPV4-3;F6ZTG3;E9Q055;E9Q2R6	Q9CPV4;E9Q197;Q9CPV4-2;Q9CPV4-3	Glyoxalase domain-containing protein 4	Glod4	7	7	7	32.6	32.6	32.6	33.316	0	32.949	383180000	58	7	7	6	6	6	5	7	7	7	6	7	7	7	7	6	6	6	5	7	7	7	6	7	7	25.0876	25.4923	25.0493	25.1646	25.0428	25.2684	25.0889	25.4064
	0.0682648	-0.0364939	Q9CPW4;Q3UA72	Q9CPW4;Q3UA72	Actin-related protein 2/3 complex subunit 5	Arpc5	4	4	4	52.3	52.3	52.3	16.288	0	91.566	167360000	43	3	3	3	2	2	3	3	4	3	3	4	3	3	3	3	2	2	3	3	4	3	3	4	3	24.1591	24.3528	23.8225	24.1943	24.3007	23.9489	24.1763	23.8554
	0.418593	-0.125889	Q9CPY7-2;Q9CPY7;A0A0G2JEM7	Q9CPY7-2;Q9CPY7	Cytosol aminopeptidase	Lap3	13	13	13	40.4	40.4	40.4	52.75	0	59.25	324750000	78	9	10	9	10	8	10	11	10	10	10	11	10	9	10	9	10	8	10	11	10	10	10	11	10	24.955	25.1056	24.7347	25.0314	24.9528	25.1889	25.0235	25.0275
	0.034394	0.0217094	Q9CQ54;A0A0U1RPJ5	Q9CQ54	NADH dehydrogenase [ubiquinone] 1 subunit C2	Ndufc2	3	3	3	19.2	19.2	19.2	14.164	0	21.745	196320000	70	2	3	3	3	3	3	3	3	3	3	3	3	2	3	3	3	3	3	3	3	3	3	3	3	24.2815	24.1497	24.29	24.3811	23.8049	24.4701	23.9966	24.0193
	0.622567	-0.1615	Q9CQ60;D3Z4X1;Q8CBG6;F6X8L5	Q9CQ60;D3Z4X1;Q8CBG6	6-phosphogluconolactonase	Pgls	6	6	6	44.4	44.4	44.4	27.254	0	36.976	120040000	37	6	5	5	5	5	5	4	5	4	5	6	5	6	5	5	5	5	5	4	5	4	5	6	5	23.4327	23.1736	23.2898	23.6016	23.4843	23.2947	23.3437	23.5213
	0.144743	-0.0908025	Q9CQ62	Q9CQ62	2,4-dienoyl-CoA reductase, mitochondrial	Decr1	2	2	2	11.9	11.9	11.9	36.213	0	8.3148	61527000	17	2	2	1	2	1	1	2	2	1	1	2	2	2	2	1	2	1	1	2	2	1	1	2	2	22.2819	22.5908	22.2821	22.7171	22.6506	22.0595	22.4517	22.4773
	0.0335221	-0.0186863	Q9CQ69	Q9CQ69	Cytochrome b-c1 complex subunit 8	Uqcrq	3	3	3	34.1	34.1	34.1	9.7681	0	16.668	403590000	55	3	3	3	3	3	3	3	3	3	3	3	3	3	3	3	3	3	3	3	3	3	3	3	3	25.5879	25.0214	25.5152	25.4239	25.2751	25.4815	25.4552	25.1464
	0.225409	-0.120883	Q9CQ75	Q9CQ75	NADH dehydrogenase [ubiquinone] 1 alpha subcomplex subunit 2	Ndufa2	4	4	4	34.3	34.3	34.3	10.916	0	36.454	272090000	49	4	4	4	4	4	4	4	4	4	4	4	4	4	4	4	4	4	4	4	4	4	4	4	4	24.3572	24.681	24.9828	24.5849	24.868	24.9309	24.6123	24.8063
	0.208436	-0.127579	Q9CQ91;D3Z670	Q9CQ91	NADH dehydrogenase [ubiquinone] 1 alpha subcomplex subunit 3	Ndufa3	3	3	3	41.7	41.7	41.7	9.3308	0	21.575	332720000	64	2	3	3	2	2	2	2	2	2	2	2	2	2	3	3	2	2	2	2	2	2	2	2	2	24.7983	24.8799	24.9964	25.3238	25.1648	24.5687	25.0065	25.1059
	0.464669	-0.178548	Q9CQ92;G3X9U9;D3YZ32	Q9CQ92;G3X9U9	Mitochondrial fission 1 protein	Fis1	3	3	3	25.7	25.7	25.7	17.008	0	26.708	103980000	28	3	3	2	2	2	3	2	2	2	2	2	3	3	3	2	2	2	3	2	2	2	2	2	3	22.9772	23.2187	23.4253	23.1893	23.5437	23.4239	23.142	23.5215
	1.47091	-0.239169	Q9CQA3	Q9CQA3	Succinate dehydrogenase [ubiquinone] iron-sulfur subunit, mitochondrial	Sdhb	6	6	6	22.3	22.3	22.3	31.814	0	36.502	523160000	132	5	5	6	6	6	6	6	6	6	6	6	6	5	5	6	6	6	6	6	6	6	6	6	6	25.4752	25.5759	25.5236	25.6605	25.8964	25.7354	25.6057	25.762
	0.0814898	-0.0325572	Q9CQB4;Q9D855	Q9CQB4;Q9D855	Cytochrome b-c1 complex subunit 7	Uqcrb	8	8	8	50.5	50.5	50.5	13.561	0	57.367	756280000	223	7	8	8	8	8	7	8	8	8	7	8	8	7	8	8	8	8	7	8	8	8	7	8	8	25.9864	26.2487	26.2634	26.1404	26.0464	26.4094	25.9657	25.6133
	0.304551	-0.143624	Q9CQC7	Q9CQC7	NADH dehydrogenase [ubiquinone] 1 beta subcomplex subunit 4	Ndufb4	3	3	3	35.7	35.7	35.7	15.081	0	23.959	422720000	66	3	3	3	3	2	2	3	2	2	2	3	2	3	3	3	3	2	2	3	2	2	2	3	2	25.0894	25.6565	25.4141	25.3414	25.5716	25.6778	25.5366	25.4637
	1.17031	-0.170408	Q9CQD1	Q9CQD1	Ras-related protein Rab-5A	Rab5a	5	2	2	27	12.1	12.1	23.598	0	12.614	67706000	38	2	2	2	2	2	2	2	2	2	2	2	2	2	2	2	2	2	2	2	2	2	2	2	2	22.6423	22.6019	22.6863	22.6866	22.8891	22.866	22.6364	22.8548
	0.157119	0.103181	Q9CQE8	Q9CQE8	UPF0568 protein C14orf166 homolog		4	4	4	29.1	29.1	29.1	28.152	0	27.949	87076000	21	4	3	3	4	4	3	4	4	4	4	3	4	4	3	3	4	4	3	4	4	4	4	3	4	22.9723	22.8509	23.1258	23.0392	23.1789	22.4213	23.3641	23.2581
	0.190887	0.155482	Q9CQH3;D3Z568;F6Y6V5;D3YX99;D3Z6W9	Q9CQH3;D3Z568;F6Y6V5;D3YX99;D3Z6W9	NADH dehydrogenase [ubiquinone] 1 beta subcomplex subunit 5, mitochondrial	Ndufb5	4	4	4	23.8	23.8	23.8	21.71	0	31.462	244380000	82	4	4	4	3	4	3	3	4	4	4	4	4	4	4	4	3	4	3	3	4	4	4	4	4	24.5568	24.7764	24.5217	24.8611	23.8714	24.656	24.4502	24.555
	0.271281	-0.0971311	Q9CQI3;A0A2I3BR94;A0A2I3BPS1;D3Z2F6;D3YY16;Q9ERL7	Q9CQI3;A0A2I3BR94;A0A2I3BPS1	Glia maturation factor beta	Gmfb	6	6	6	65.5	65.5	65.5	16.723	0	65.196	480170000	71	4	5	4	4	5	4	4	6	6	6	4	5	4	5	4	4	5	4	4	6	6	6	4	5	25.6982	25.3279	25.4538	25.6382	25.7233	25.4099	25.5653	25.4663
	0.216672	0.0369975	Q9CQI6;A0A1D5RLP1	Q9CQI6	Coactosin-like protein	Cotl1	6	6	6	47.2	47.2	47.2	15.944	0	37.472	341010000	140	6	6	6	6	6	6	5	5	5	6	6	6	6	6	6	6	6	6	5	5	5	6	6	6	25.1145	25.0678	24.9624	25.0581	25.062	24.9136	25.1811	24.9638
	0.378354	0.1764	Q9CQJ6;E9Q0G1	Q9CQJ6;E9Q0G1	Density-regulated protein	Denr	5	5	5	32.8	32.8	32.8	22.166	0	17.34	50432000	5	4	3	3	3	4	3	3	4	4	4	4	4	4	3	3	3	4	3	3	4	4	4	4	4	22.6684	22.0937	22.073	22.103	22.1288	22.074	22.3937	22.2913
	0.530794	-0.174545	Q9CQJ8	Q9CQJ8	NADH dehydrogenase [ubiquinone] 1 beta subcomplex subunit 9	Ndufb9	8	8	8	65.4	65.4	65.4	21.984	0	167.84	453550000	127	7	7	7	7	7	8	6	7	7	7	7	7	7	7	7	7	7	8	6	7	7	7	7	7	25.2034	25.6572	25.2894	25.5749	25.6175	25.4813	25.3291	25.3671
	0.691724	-0.205105	Q9CQM5	Q9CQM5	Thioredoxin domain-containing protein 17	Txndc17	2	2	2	18.7	18.7	18.7	14.015	0	6.5717	51729000	22	2	2	1	2	2	2	2	2	1	2	2	2	2	2	1	2	2	2	2	2	1	2	2	2	22.0973	22.0282	22.4182	22.5095	22.3214	22.3282	21.6768	22.0855
	0.934661	-0.109334	Q9CQQ7;A0A0G2JGX3	Q9CQQ7	ATP synthase F(0) complex subunit B1, mitochondrial	Atp5f1	11	11	11	37.9	37.9	37.9	28.948	0	78.413	1854200000	377	11	10	10	11	10	10	9	11	10	11	10	11	11	10	10	11	10	10	9	11	10	11	10	11	27.2237	27.3871	27.303	27.3839	27.3886	27.4692	27.5896	27.5478
	0.0018242	-0.000823339	Q9CQR2	Q9CQR2	40S ribosomal protein S21	Rps21	3	3	3	41	41	41	9.1413	0	15.213	75552000	57	3	3	3	3	3	2	3	3	3	3	3	3	3	3	3	3	3	2	3	3	3	3	3	3	22.6492	23.1439	22.8275	22.929	22.837	22.8571	22.9235	22.7745
	0.347439	0.370712	Q9CQR4	Q9CQR4	Acyl-coenzyme A thioesterase 13;Acyl-coenzyme A thioesterase 13, N-terminally processed	Acot13	3	3	3	34.3	34.3	34.3	15.183	0	7.476	41431000	30	2	2	2	2	2	1	1	2	1	2	2	2	2	2	2	2	2	1	1	2	1	2	2	2	22.0724	22.0809	21.6564	22.1048	20.7389	21.8539	21.7577	22.0877
	0.152408	0.0708173	Q9CQS4	Q9CQS4	Solute carrier family 25 member 46	Slc25a46	6	6	6	26.3	26.3	26.3	46.224	0	11.458	37713000	4	5	5	5	3	3	3	3	4	3	4	4	3	5	5	5	3	3	3	3	4	3	4	4	3	22.2388	21.7101	22.1879	21.9029	21.974	22.0475	21.7543	21.766
	0.0306112	0.00867462	Q9CQV6;M0QWC2	Q9CQV6;M0QWC2	Microtubule-associated proteins 1A/1B light chain 3B	Map1lc3b	3	3	1	22.4	22.4	11.2	14.617	0	16.266	364790000	68	3	3	3	3	3	3	3	3	3	3	3	3	1	1	1	1	1	1	1	1	1	1	1	1	25.0827	25.3517	25.1987	25.3085	25.1234	25.1752	25.3058	25.2585
	1.10021	0.20292	Q9CQV8-2;Q9CQV8;A2A5N1	Q9CQV8-2;Q9CQV8;A2A5N1	14-3-3 protein beta/alpha;14-3-3 protein beta/alpha, N-terminally processed	Ywhab	11	8	8	50	43	43	27.854	0	323.31	2300500000	418	8	8	8	7	8	7	8	8	8	7	7	7	8	8	8	7	8	7	8	8	8	7	7	7	27.9107	27.7643	27.6268	27.598	27.5871	27.508	28.0962	27.8365
	0.0784226	0.115864	Q9CQW1	Q9CQW1	Synaptobrevin homolog YKT6	Ykt6	4	4	4	27.3	27.3	27.3	22.314	0	31.506	149940000	36	4	4	4	3	4	3	4	4	4	4	4	4	4	4	4	3	4	3	4	4	4	4	4	4	23.4892	24.3035	23.8088	24.5242	22.9212	23.8085	23.6221	23.8178
	0.224419	0.114508	Q9CQX2	Q9CQX2	Cytochrome b5 type B	Cyb5b	5	5	5	51.4	51.4	51.4	16.318	0	67.468	580540000	102	5	5	5	5	5	4	5	5	5	5	5	4	5	5	5	5	5	4	5	5	5	5	5	4	26.1639	25.5063	25.9903	25.721	25.8312	25.7648	25.8171	25.913
	0.854703	0.26123	Q9CQX8;Q9D6T9	Q9CQX8;Q9D6T9	28S ribosomal protein S36, mitochondrial	Mrps36	4	4	4	69.6	69.6	69.6	11.101	0	35.497	268190000	70	4	4	4	4	4	4	4	4	4	4	4	4	4	4	4	4	4	4	4	4	4	4	4	4	24.7643	24.737	24.5097	24.4576	24.5829	24.1868	24.7163	24.799
	0.0141804	-0.00787036	Q9CQZ1	Q9CQZ1	Heat shock factor-binding protein 1	Hsbp1	3	3	3	72.4	72.4	72.4	8.6107	0	37.549	219600000	50	3	2	2	3	2	2	2	2	3	2	2	2	3	2	2	3	2	2	2	2	3	2	2	2	24.0851	24.0949	24.4154	23.9129	24.3892	24.3169	24.3533	24.4382
	0.144896	0.116639	Q9CQZ5;A0A2R8W6V1;A0A2R8VI90	Q9CQZ5	NADH dehydrogenase [ubiquinone] 1 alpha subcomplex subunit 6	Ndufa6	4	4	4	37.4	37.4	37.4	15.283	0	14.592	149850000	84	4	4	4	3	4	3	3	3	4	4	3	4	4	4	4	3	4	3	3	3	4	4	3	4	23.478	23.842	24.4342	23.5894	23.8685	23.9464	23.8708	23.9554
	0.661635	-0.171879	Q9CQZ6	Q9CQZ6	NADH dehydrogenase [ubiquinone] 1 beta subcomplex subunit 3	Ndufb3	3	3	3	33.7	33.7	33.7	11.692	0	13.537	157090000	8	3	3	3	3	3	2	2	3	3	3	3	3	3	3	3	3	3	2	2	3	3	3	3	3	23.9525	23.8925	24.052	23.9982	24.0641	24.3504	23.851	23.6971
	1.22443	0.438048	Q9CR16	Q9CR16	Peptidyl-prolyl cis-trans isomerase D	Ppid	9	9	9	29.2	29.2	29.2	40.742	0	24.82	195050000	45	8	7	8	7	3	9	6	7	9	8	8	8	8	7	8	7	3	9	6	7	9	8	8	8	24.43	24.3447	24.5076	24.0119	23.6993	24.2569	23.7802	24.0479
	0.011551	0.00820478	Q9CR26;F6W5Q8;F8WJC2	Q9CR26;F6W5Q8	Vacuolar protein sorting-associated protein VTA1 homolog	Vta1	4	4	4	17.5	17.5	17.5	33.913	0	26.797	43548000	15	3	3	3	3	3	3	3	3	2	3	3	3	3	3	3	3	3	3	3	3	2	3	3	3	22.1009	21.8935	22.1678	22.3244	22.2002	21.613	22.1028	21.9976
	0.0529213	0.0267309	Q9CR51	Q9CR51	V-type proton ATPase subunit G 1	Atp6v1g1	2	2	2	42.4	42.4	42.4	13.724	0	44.336	140310000	44	2	2	2	2	2	2	2	2	2	2	2	2	2	2	2	2	2	2	2	2	2	2	2	2	23.8497	23.6834	24.25	23.8148	23.9265	23.9615	23.6398	23.9731
	0.101688	-0.0597916	Q9CR57;A0A1L1SUF6	Q9CR57;A0A1L1SUF6	60S ribosomal protein L14	Rpl14	4	4	4	21.7	21.7	21.7	23.564	0	11.032	50139000	26	4	4	4	4	4	2	3	3	3	3	3	2	4	4	4	4	4	2	3	3	3	3	3	2	22.3412	22.5334	21.8956	22.4561	22.1358	22.3576	22.1677	22.4142
	0.364712	-0.132907	Q9CR61	Q9CR61	NADH dehydrogenase [ubiquinone] 1 beta subcomplex subunit 7	Ndufb7	7	7	7	56.2	56.2	56.2	16.331	0	49.48	544360000	68	5	5	6	7	6	6	7	6	7	6	6	6	5	5	6	7	6	6	7	6	7	6	6	6	25.5571	25.7338	25.9436	25.6811	25.9208	26.0313	25.705	25.8819
	0.581497	0.0798378	Q9CR62;Q5SX46;Q5SX48	Q9CR62;Q5SX46	Mitochondrial 2-oxoglutarate/malate carrier protein	Slc25a11	10	10	10	40.8	40.8	40.8	34.155	0	58.318	532440000	157	9	9	9	9	9	9	10	9	9	10	9	8	9	9	9	9	9	9	10	9	9	10	9	8	25.6894	25.8202	25.7507	25.5798	25.7015	25.7395	25.5222	25.6154
	0.15647	-0.064174	Q9CR68	Q9CR68	Cytochrome b-c1 complex subunit Rieske, mitochondrial;Cytochrome b-c1 complex subunit 11	Uqcrfs1	6	6	6	25.5	25.5	25.5	29.367	0	59.645	539560000	124	5	5	4	5	5	4	5	4	5	6	4	6	5	5	4	5	5	4	5	4	5	6	4	6	25.5603	25.9035	25.4704	25.7689	25.8046	25.5532	25.6245	25.29
	0.0264418	-0.0166283	Q9CR86	Q9CR86	Calcium-regulated heat stable protein 1	Carhsp1	2	2	2	35.1	35.1	35.1	16.062	0	10.206	56334000	22	2	1	1	2	2	1	1	1	2	2	2	2	2	1	1	2	2	1	1	1	2	2	2	2	21.8047	22.234	22.4783	22.2691	22.0382	22.2597	22.5161	23.12
	0.0685209	0.0185083	Q9CR95	Q9CR95	Adaptin ear-binding coat-associated protein 1	Necap1	5	5	5	30.9	30.9	30.9	29.639	0	28.353	253660000	88	4	4	5	5	5	5	4	4	5	5	5	5	4	4	5	5	5	5	4	4	5	5	5	5	24.4466	24.4573	24.3519	24.224	24.497	24.4793	24.2282	24.3228
	0.170673	-0.117867	Q9CRB6	Q9CRB6	Tubulin polymerization-promoting protein family member 3	Tppp3	6	6	6	35.2	35.2	35.2	18.965	0	26.972	64935000	7	4	3	3	4	3	2	3	3	4	4	3	4	4	3	3	4	3	2	3	3	4	4	3	4	22.7924	22.0963	22.2195	22.728	22.5186	22.2152	23.0184	22.3455
	0.00331858	-0.00103505	Q9CRB9;S4R238;F6QFL0;Q9D9P1;D3Z0L4	Q9CRB9;S4R238;F6QFL0;Q9D9P1;D3Z0L4	MICOS complex subunit Mic19	Chchd3	2	2	2	10.6	10.6	10.6	26.334	0	5.4767	67833000	2	2	2	2	2	2	2	2	2	2	2	2	2	2	2	2	2	2	2	2	2	2	2	2	2	22.9162	22.5995	22.6812	22.6824	22.7116	22.806	22.687	22.5034
	1.68793	0.307566	Q9CRD0-3;Q9CRD0-2;Q9CRD0;A0A0J9YUK7;A0A0J9YUB6;A0A0J9YTV6;A0A0J9YTV7	Q9CRD0-3;Q9CRD0-2;Q9CRD0;A0A0J9YUK7;A0A0J9YUB6	OCIA domain-containing protein 1	Ociad1	4	4	4	40.7	40.7	40.7	20.848	0	7.9491	23534000	5	4	2	2	3	3	2	1	2	3	2	2	3	4	2	2	3	3	2	1	2	3	2	2	3	21.3506	21.5401	21.3806	21.0966	21.0267	21.2253	20.8249	20.9158
	0.00396358	0.00126394	Q9CRY7	Q9CRY7	Glycerophosphodiester phosphodiesterase domain-containing protein 1	Gdpd1	3	3	3	19.4	19.4	19.4	35.866	0	11.157	59969000	13	2	2	3	3	2	1	3	2	2	2	3	3	2	2	3	3	2	1	3	2	2	2	3	3	22.558	22.359	22.6497	22.4023	22.5778	22.5828	22.6382	22.6349
	0.275873	0.0821489	Q9CVB6;D3YXG6	Q9CVB6;D3YXG6	Actin-related protein 2/3 complex subunit 2	Arpc2	14	14	14	53	53	53	34.357	0	52.203	532450000	186	11	11	12	11	11	12	12	12	12	11	12	10	11	11	12	11	11	12	12	12	12	11	12	10	25.7484	25.7664	25.9432	25.5627	25.7324	25.9165	25.6729	25.5993
	2.59766	-0.37922	Q9CWF2	Q9CWF2	Tubulin beta-2B chain	Tubb2b	31	1	1	78.4	2.7	2.7	49.953	0	5.0744	248490000	45	1	1	1	1	1	1	1	1	1	1	1	1	1	1	1	1	1	1	1	1	1	1	1	1	24.525	24.4848	24.582	24.8419	24.8834	25.0042	24.6758	24.3446
	0.582443	-0.120001	Q9CWJ9	Q9CWJ9	Bifunctional purine biosynthesis protein PURH;Phosphoribosylaminoimidazolecarboxamide formyltransferase;IMP cyclohydrolase	Atic	10	10	10	27.5	27.5	27.5	64.217	0	39.377	130610000	40	7	5	6	6	6	7	5	7	6	8	8	8	7	5	6	6	6	7	5	7	6	8	8	8	23.7934	23.5393	23.572	23.8364	23.6792	23.7491	23.7943	23.5419
	0.648571	-0.108944	Q9CWS0;D3YU15;G3UZR0;O08972;Q99LD8	Q9CWS0;D3YU15	N(G),N(G)-dimethylarginine dimethylaminohydrolase 1	Ddah1	13	13	13	67	67	67	31.381	0	86.598	637200000	210	11	11	11	11	10	11	11	10	11	12	11	12	11	11	11	11	10	11	11	10	11	12	11	12	25.7323	25.9216	25.7361	25.8196	25.9545	25.9427	25.9721	26.0635
	1.66816	0.312166	Q9CX34	Q9CX34	Suppressor of G2 allele of SKP1 homolog	Sugt1	5	5	5	20.8	20.8	20.8	38.158	0	14.568	118060000	1	4	4	4	4	4	3	4	3	5	5	4	4	4	4	4	4	4	3	4	3	5	5	4	4	23.6401	23.6614	23.8847	23.3715	23.396	23.4824	23.5503	23.5278
	0.0485015	0.0301882	Q9CX86	Q9CX86	Heterogeneous nuclear ribonucleoprotein A0	Hnrnpa0	3	3	3	10.2	10.2	10.2	30.53	0	7.8089	62202000	73	1	2	2	3	2	2	3	3	3	3	2	3	1	2	2	3	2	2	3	3	3	3	2	3	21.9806	22.5761	22.435	22.4992	22.3013	22.1006	22.9327	22.3352
	1.31898	0.565947	Q9CXW3;A0A0A6YY29	Q9CXW3;A0A0A6YY29	Calcyclin-binding protein	Cacybp	6	6	6	33.6	33.6	33.6	26.51	0	22.86	134790000	42	5	5	5	5	5	5	3	5	6	5	6	6	5	5	5	5	5	5	3	5	6	5	6	6	23.7711	23.7915	24.3082	23.4836	23.4931	23.1963	23.3955	23.6616
	0.0911244	-0.0447776	Q9CXY6	Q9CXY6	Interleukin enhancer-binding factor 2	Ilf2	7	7	7	29.7	29.7	29.7	43.062	0	19.891	110490000	37	5	5	5	6	6	4	3	5	5	5	6	4	5	5	5	6	6	4	3	5	5	5	6	4	23.2671	23.4147	23.689	23.2641	23.5592	23.6819	23.3867	23.3673
	0.143275	0.0671546	Q9CYG7-2;Q9CYG7	Q9CYG7-2;Q9CYG7	Mitochondrial import receptor subunit TOM34	Tomm34	6	6	6	23.9	23.9	23.9	34.28	0	11.323	69049000	7	4	6	5	3	5	4	3	4	4	4	5	3	4	6	5	3	5	4	3	4	4	4	5	3	22.5783	22.7787	22.9167	22.9177	22.7293	22.4252	22.809	22.9345
	1.36699	0.234519	Q9CYT6;A0A286YCS6;D3YTR7	Q9CYT6;A0A286YCS6;D3YTR7	Adenylyl cyclase-associated protein 2;Adenylyl cyclase-associated protein	Cap2	12	11	11	40.1	38.4	38.4	52.861	0	93.053	577670000	166	11	10	9	10	10	9	9	11	11	11	10	10	11	10	9	10	10	9	9	11	11	11	10	10	26.0005	25.8314	26.0714	25.738	25.6673	25.7944	25.8473	25.7061
	0.865045	-0.199514	Q9CZ04;Q9CZ04-2;D3Z0S0;D3YVI6;D3Z440	Q9CZ04;Q9CZ04-2;D3Z0S0;D3YVI6;D3Z440	COP9 signalosome complex subunit 7a	Cops7a	2	2	2	12.4	12.4	12.4	30.224	0	12.322	40547000	3	2	1	2	2	2	1	1	2	2	1	1	1	2	1	2	2	2	1	1	2	2	1	1	1	21.8803	21.8793	22.0146	21.9321	22.1923	22.2483	21.9062	22.2131
	0.432117	-0.0637957	Q9CZ13;A0A0A6YWX6;A0A0A6YW82	Q9CZ13	Cytochrome b-c1 complex subunit 1, mitochondrial	Uqcrc1	14	14	14	42.9	42.9	42.9	52.851	0	296.56	2887400000	449	13	14	14	14	14	14	14	14	14	14	14	14	13	14	14	14	14	14	14	14	14	14	14	14	27.9979	27.9954	28.0702	28.0367	28.2009	28.0173	28.1157	28.1067
	0.275987	0.0986029	Q9CZ30;B1AYJ9;Q9CZ30-2	Q9CZ30;B1AYJ9;Q9CZ30-2	Obg-like ATPase 1	Ola1	8	8	8	28.5	28.5	28.5	44.729	0	65.377	334240000	44	6	7	6	8	7	6	5	7	6	6	6	7	6	7	6	8	7	6	5	7	6	6	6	7	24.949	25.1419	25.3306	25.0493	25.1973	24.8791	24.9862	24.9806
	0.0766169	-0.0500107	Q9CZ42-2;J3QN06;J3QMM7;K3W4M4;Q9CZ42-3;Q9CZ42	Q9CZ42-2;J3QN06;J3QMM7;K3W4M4;Q9CZ42-3;Q9CZ42	ATP-dependent (S)-NAD(P)H-hydrate dehydratase	Carkd	9	9	9	44.3	44.3	44.3	32.151	0	38.103	269500000	38	7	5	6	7	7	6	6	4	6	6	6	6	7	5	6	7	7	6	6	4	6	6	6	6	24.9395	24.6226	24.5489	24.9333	24.9653	24.3623	24.9143	24.8129
	0.361822	0.0352866	Q9CZ44;Q9CZ44-3;A2AT02;Q9CZ44-2	Q9CZ44;Q9CZ44-3;A2AT02;Q9CZ44-2	NSFL1 cofactor p47	Nsfl1c	9	9	9	39.7	39.7	39.7	40.709	0	69.219	235550000	67	8	9	9	9	9	8	9	8	8	6	8	7	8	9	9	9	9	8	9	8	8	6	8	7	24.572	24.4664	24.4707	24.4914	24.4246	24.4872	24.6405	24.2633
	1.01215	0.183034	Q9ERR1-2;Q9CZA6-3;Q9CZA6-2;Q9CZA6;Q9ERR1;F6Q325;Q9CZA6-4	Q9ERR1-2;Q9CZA6-3;Q9CZA6-2;Q9CZA6;Q9ERR1;F6Q325;Q9CZA6-4	Nuclear distribution protein nudE-like 1;Nuclear distribution protein nudE homolog 1	Ndel1;Nde1	2	2	2	7.3	7.3	7.3	35.51	0	8.0812	23508000	3	1	1	1	2	2	1	1	1	1	1	2	1	1	1	1	2	2	1	1	1	1	1	2	1	21.1655	21.314	21.0648	21.0783	20.9251	20.9917	21.0854	21.4767
	1.87114	-0.291286	Q9CZC8;D3YXW0;A0A0N4SWD0	Q9CZC8	Secernin-1	Scrn1	7	7	7	23.7	23.7	23.7	46.325	0	43.23	321280000	79	6	6	7	7	7	6	7	6	7	7	5	6	6	6	7	7	7	6	7	6	7	7	5	6	24.5537	24.7507	24.5922	24.9132	24.986	24.8712	24.8923	24.8221
	0.468709	-0.165916	Q9CZJ2	Q9CZJ2	Heat shock 70 kDa protein 12B	Hspa12b	3	1	1	3.4	1.5	1.5	76.118	0	3.7878	146720000	38	1	1	1	1	1	1	1	1	1	1	1	1	1	1	1	1	1	1	1	1	1	1	1	1	23.6529	23.6328	23.9495	23.9232	24.1021	23.7077	23.8437	23.954
	0.483281	0.124568	Q9CZM2;B8JKK2	Q9CZM2;B8JKK2	60S ribosomal protein L15;Ribosomal protein L15	Rpl15	3	3	3	13.7	13.7	13.7	24.146	0	14.942	54314000	29	2	3	2	3	3	3	2	3	3	2	2	3	2	3	2	3	3	3	2	3	3	2	2	3	22.6286	22.682	22.4914	22.389	22.669	22.3702	22.3223	22.3403
	0.483037	-0.316221	Q9CZR8;Q9CX33	Q9CZR8	Elongation factor Ts, mitochondrial	Tsfm	4	4	4	29.9	29.9	29.9	35.334	0	29.747	89947000	18	3	3	3	4	4	1	2	3	3	3	2	3	3	3	3	4	4	1	2	3	3	3	2	3	22.6164	23.0039	23.1452	23.0072	22.9956	23.7113	23.1971	23.3422
	0.382091	-0.23141	Q9CZS1;G3UYH1	Q9CZS1	Aldehyde dehydrogenase X, mitochondrial	Aldh1b1	12	11	11	27.7	26.2	26.2	57.552	0	26.403	170760000	20	9	8	10	9	9	8	8	9	9	9	8	6	9	8	10	9	9	8	8	9	9	9	8	6	23.9019	23.867	23.9326	23.6872	24.5667	24.1418	24.058	24.1877
	2.186	-0.399958	Q9CZT8;A2A7Z6	Q9CZT8;A2A7Z6	Ras-related protein Rab-3B	Rab3b	5	4	4	32.4	28.8	28.8	24.757	0	51.894	192380000	44	3	3	3	3	3	3	3	3	3	4	3	3	3	3	3	3	3	3	3	3	3	4	3	3	24.0919	24.1241	24.1015	24.3899	24.4777	24.6498	24.0627	24.1784
	1.13554	-0.114928	Q9CZU6;Q80X68	Q9CZU6	Citrate synthase, mitochondrial	Cs	16	16	16	44.2	44.2	44.2	51.736	0	323.31	4966500000	946	16	16	16	16	16	16	16	16	16	15	16	16	16	16	16	16	16	16	16	16	16	15	16	16	28.691	28.7901	28.6629	28.8757	28.7794	28.8337	28.85	28.9114
	0.221185	-0.0626138	Q9CZW5	Q9CZW5	Mitochondrial import receptor subunit TOM70	Tomm70a	15	15	15	34.9	34.9	34.9	67.589	0	104.96	547180000	154	13	13	13	13	15	10	11	11	14	12	14	13	13	13	13	13	15	10	11	11	14	12	14	13	25.8751	25.5776	25.7954	25.7784	25.7192	25.9383	25.4587	25.6546
	1.33019	-0.367028	Q9D023;A0A0A6YY89;E9PY67;Q3V1C1;G5E869	Q9D023;A0A0A6YY89	Mitochondrial pyruvate carrier 2	Mpc2	4	4	4	22.8	22.8	22.8	14.286	0	12.572	113910000	74	3	4	3	4	3	2	4	3	3	3	3	3	3	4	3	4	3	2	4	3	3	3	3	3	23.2981	23.3826	23.0981	23.6277	23.7954	23.4568	23.3688	23.7588
	0.0360926	0.00749079	Q9D051	Q9D051	Pyruvate dehydrogenase E1 component subunit beta, mitochondrial	Pdhb	15	15	15	60.7	60.7	60.7	38.937	0	228.31	2419300000	508	14	14	14	14	14	15	14	14	14	13	14	13	14	14	14	14	14	15	14	14	14	13	14	13	27.6226	27.7887	27.8486	27.7266	27.7843	27.7266	27.8205	27.7615
	0.0910742	-0.109734	Q9D0E1;B8JK32;Q9D0E1-2;B8JK33;F7C9U3;F6W322	Q9D0E1;B8JK32;Q9D0E1-2;B8JK33	Heterogeneous nuclear ribonucleoprotein M	Hnrnpm	8	8	8	19.1	19.1	19.1	77.648	0	28.277	109420000	20	3	4	4	4	6	4	2	5	5	4	6	3	3	4	4	4	6	4	2	5	5	4	6	3	23.1802	23.6679	22.8332	23.7332	22.6297	23.6476	23.499	23.5752
	1.48708	-0.221216	Q9D0F9;A2CEK3	Q9D0F9;A2CEK3	Phosphoglucomutase-1	Pgm1;Pgm2	15	15	15	44.7	44.7	44.7	61.417	0	113.61	704530000	164	15	13	13	15	13	13	13	13	13	14	13	13	15	13	13	15	13	13	13	13	13	14	13	13	26.0593	25.9798	25.9194	26.1673	26.3175	26.1374	26.0693	26.2055
	0.376441	0.350321	Q9D0I9	Q9D0I9	Arginine--tRNA ligase, cytoplasmic	Rars	5	5	5	10.3	10.3	10.3	75.673	0	10.019	54052000	10	3	3	2	3	4	3	3	3	2	3	1	3	3	3	2	3	4	3	3	3	2	3	1	3	22.3757	22.7671	21.8742	22.3532	21.4098	22.203	22.4015	22.2709
	0.344373	-0.0961348	Q9D0K2;Q3UJQ9	Q9D0K2;Q3UJQ9	Succinyl-CoA:3-ketoacid coenzyme A transferase 1, mitochondrial;Succinyl-CoA:3-ketoacid-coenzyme A transferase	Oxct1	14	14	13	39.4	39.4	37.1	55.988	0	104.71	729240000	192	8	9	10	10	9	9	10	9	11	10	9	11	8	9	10	10	9	9	10	9	11	10	9	11	26.1243	26.2406	25.9196	26.2347	26.2798	26.0584	26.2123	26.258
	0.0915404	-0.0482477	Q9D0L8-2;Q9D0L8;D3Z4K1;D3Z478;D3YYS7;Q9D0L8-3	Q9D0L8-2;Q9D0L8;D3Z4K1;D3Z478;D3YYS7;Q9D0L8-3	mRNA cap guanine-N7 methyltransferase	Rnmt	2	2	2	8.4	8.4	8.4	41.908	0	5.1827	15621000	2	1	2	1	2	2	1	1	2	1	2	1	2	1	2	1	2	2	1	1	2	1	2	1	2	20.8131	20.4094	20.4193	20.7145	20.3306	20.7415	20.6824	20.7126
	0.0722945	-0.0209109	Q9D0M3-2;Q9D0M3;A0A2R8VHK1	Q9D0M3-2;Q9D0M3;A0A2R8VHK1	Cytochrome c1, heme protein, mitochondrial	Cyc1	8	8	8	57.1	57.1	57.1	29.497	0	197.2	2093500000	400	8	8	8	8	8	7	7	8	7	7	7	7	8	8	8	8	8	7	7	8	7	7	7	7	27.6939	27.5203	27.5427	27.4356	27.6908	27.6932	27.7042	27.7378
	1.01396	0.272446	Q9D0M5;D6RIN4;Q80ZS7	Q9D0M5	Dynein light chain 2, cytoplasmic	Dynll2	6	6	2	78.7	78.7	32.6	10.35	0	110.29	913850000	194	6	6	6	6	6	4	4	5	5	4	4	4	2	2	2	2	2	2	2	2	2	2	2	2	26.5632	26.5171	26.5987	26.4219	26.4	26.0398	26.673	26.3832
	0.851614	-0.30646	Q9D0S9	Q9D0S9	Histidine triad nucleotide-binding protein 2, mitochondrial	Hint2	2	2	2	21.5	21.5	21.5	17.32	0	26.05	97383000	34	2	2	2	2	2	2	2	2	2	2	2	2	2	2	2	2	2	2	2	2	2	2	2	2	22.7504	23.1319	22.5772	23.1657	23.1532	23.06	23.5429	23.5533
	0.193965	0.0756035	Q9D172;A0A1W2P870;A0A1W2P7B6	Q9D172;A0A1W2P870;A0A1W2P7B6	ES1 protein homolog, mitochondrial	D10Jhu81e	8	8	8	49.2	49.2	49.2	28.09	0	226.89	882720000	186	7	7	8	5	7	6	7	7	6	7	7	6	7	7	8	5	7	6	7	7	6	7	7	6	26.3522	26.5893	26.308	26.5779	26.1765	26.2684	26.4665	26.3166
	0.10097	0.0212256	Q9D1A2	Q9D1A2	Cytosolic non-specific dipeptidase	Cndp2	13	13	13	38.9	38.9	38.9	52.767	0	43.709	418190000	78	12	13	13	12	12	11	11	12	11	10	9	10	12	13	13	12	12	11	11	12	11	10	9	10	25.443	25.3047	25.4676	25.2802	25.3992	25.4722	25.3049	25.3815
	1.08583	-0.271266	Q9D1E6	Q9D1E6	Tubulin-folding cofactor B	Tbcb	3	3	3	15.2	15.2	15.2	27.385	0	31.222	58898000	10	3	3	3	3	2	2	3	3	2	3	2	3	3	3	3	3	2	2	3	3	2	3	2	3	22.4098	22.529	22.2528	22.5942	22.5711	22.8399	22.6457	22.066
	3.10193	-0.488047	Q9D1G1	Q9D1G1	Ras-related protein Rab-1B	Rab1b	6	2	2	34.8	16.4	16.4	22.187	0	46.298	234800000	54	2	2	2	2	2	2	2	2	2	2	2	2	2	2	2	2	2	2	2	2	2	2	2	2	24.4098	24.2705	24.2669	24.7927	24.8517	24.767	24.6229	24.57
	0.638202	0.119455	Q9D1K2;A0A0N4SVE1;F7B2B4	Q9D1K2;A0A0N4SVE1;F7B2B4	V-type proton ATPase subunit F	Atp6v1f	6	6	6	61.3	61.3	61.3	13.37	0	28.529	323620000	97	6	6	6	6	6	5	6	6	6	5	6	5	6	6	6	6	6	5	6	6	6	5	6	5	25.208	25.0099	25.007	25.0304	24.8556	24.9806	24.7198	25.0091
	0.09421	-0.056242	Q9D1Q6	Q9D1Q6	Endoplasmic reticulum resident protein 44	Erp44	4	4	4	19.2	19.2	19.2	46.852	0	10.441	84289000	15	3	2	3	3	3	3	2	3	3	4	4	4	3	2	3	3	3	3	2	3	3	4	4	4	22.9937	22.9657	23.175	22.7156	23.4035	23.184	22.8712	22.9764
	2.11428	-0.188637	Q9D2G2;Q9D2G2-2	Q9D2G2;Q9D2G2-2	Dihydrolipoyllysine-residue succinyltransferase component of 2-oxoglutarate dehydrogenase complex, mitochondrial	Dlst	6	6	6	17.2	17.2	17.2	48.994	0	95.416	456660000	182	5	4	5	5	5	5	5	5	5	6	5	5	5	4	5	5	5	5	5	5	5	6	5	5	25.2135	25.2241	25.3311	25.4421	25.456	25.4365	25.3242	25.4559
	0.0688354	-0.0247809	Q9D2M8-2;Q9D2M8;B2KF55;A6X925;B7ZBY7;E9PY39;Q9CZY3-2;Q9CZY3;B7ZBY6	Q9D2M8-2;Q9D2M8;B2KF55;A6X925;B7ZBY7;E9PY39;Q9CZY3-2;Q9CZY3;B7ZBY6	Ubiquitin-conjugating enzyme E2 variant 2;Ubiquitin-conjugating enzyme E2 variant 1	Ube2v2;Ube2v1;Gm20431	4	4	4	37.9	37.9	37.9	11.674	0	13.991	375700000	135	4	3	3	4	4	4	4	4	4	3	3	3	4	3	3	4	4	4	4	4	4	3	3	3	25.0979	25.2714	25.3701	25.0995	25.4368	25.2776	25.088	25.1768
	0.182003	-0.0984236	Q9D2V7	Q9D2V7	Coronin-7	Coro7	5	5	5	10.2	10.2	10.2	100.81	0	9.6274	79956000	18	4	3	3	4	3	4	4	2	3	5	4	5	4	3	3	4	3	4	4	2	3	5	4	5	23.0117	22.5882	23.1612	23.1557	23.1079	22.7927	22.612	23.4339
	0.349118	-0.174086	Q9D394;A0A0G2JFT8;Q9D394-3;Q9D394-4;Q9D394-2	Q9D394;A0A0G2JFT8;Q9D394-3;Q9D394-4;Q9D394-2	Protein RUFY3	Rufy3	5	5	5	16.8	16.8	16.8	53.006	0	15.476	109700000	30	4	5	5	3	4	2	2	5	4	4	4	4	4	5	5	3	4	2	2	5	4	4	4	4	22.9924	23.2943	23.3321	23.6983	23.0871	23.3557	23.3024	23.5476
	0.0588423	-0.0161044	Q9D3A9;Q9D3A9-4;A0A0U1RPU8;Q9D3A9-5;A0A0U1RPY1;D6RG66	Q9D3A9;Q9D3A9-4;A0A0U1RPU8;Q9D3A9-5	Protein tweety homolog 1	Ttyh1	5	5	5	16.4	16.4	16.4	49.032	0	52.746	215920000	90	5	5	5	5	5	5	4	5	5	5	5	5	5	5	5	5	5	5	4	5	5	5	5	5	24.3606	24.4053	24.5523	24.4847	24.5684	24.3135	24.1598	24.2188
	0.65027	-0.386142	Q9D3D9	Q9D3D9	ATP synthase subunit delta, mitochondrial	Atp5d	2	2	2	13.7	13.7	13.7	17.6	0	25.896	409890000	243	2	2	2	2	2	2	2	2	2	2	2	2	2	2	2	2	2	2	2	2	2	2	2	2	24.8405	24.2986	24.3547	24.82	24.5635	25.2687	24.1003	24.4696
	0.405932	0.113729	Q9D4H1	Q9D4H1	Exocyst complex component 2	Exoc2	2	2	2	4.7	4.7	4.7	103.96	0	12.466	35252000	18	2	1	2	2	2	2	2	2	1	2	1	2	2	1	2	2	2	2	2	2	1	2	1	2	21.6521	21.8608	21.7686	21.5999	21.8428	21.4977	21.844	21.5319
	2.04133	-0.133146	Q9D6F9	Q9D6F9	Tubulin beta-4A chain	Tubb4a	30	6	6	83.3	16.2	16.2	49.585	0	301.03	3839500000	405	5	6	6	6	6	6	5	6	5	6	6	5	5	6	6	6	6	6	5	6	5	6	6	5	28.385	28.3074	28.3749	28.5166	28.4704	28.4797	28.6078	28.4971
	0.968501	-0.272535	Q9D6J5;F6VCY0;Q3V406;E9Q9J5	Q9D6J5;F6VCY0;Q3V406;E9Q9J5	NADH dehydrogenase [ubiquinone] 1 beta subcomplex subunit 8, mitochondrial	Ndufb8	6	6	6	44.6	44.6	44.6	21.876	0	34.747	556100000	71	6	6	6	6	6	6	6	6	6	6	5	6	6	6	6	6	6	6	6	6	6	6	5	6	25.717	25.6961	25.3557	25.8078	25.983	25.7957	25.7727	25.6339
	0.226633	0.0889784	Q9D6J6;Q9D6J6-2;M0QWP9;D6RGN4	Q9D6J6;Q9D6J6-2	NADH dehydrogenase [ubiquinone] flavoprotein 2, mitochondrial	Ndufv2	10	10	10	50.8	50.8	50.8	27.285	0	64.752	534630000	140	9	8	9	8	9	7	7	6	10	10	9	9	9	8	9	8	9	7	7	6	10	10	9	9	25.4944	25.8265	25.4603	25.654	25.5448	25.3155	25.54	25.7314
	0.584063	-0.182722	Q9D6M3;E9PV90;E9PY45;E9Q6M6;A0A0J9YTY6;V9GWS2;Q80X52;E9Q579;A0A0J9YUX4;A0A0J9YUJ4;V9GWV4;A0A0J9YVJ3	Q9D6M3;E9PV90;E9PY45;E9Q6M6;A0A0J9YTY6	Mitochondrial glutamate carrier 1	Slc25a22	10	10	7	38.1	38.1	29.1	34.67	0	100.48	891010000	363	10	10	10	10	10	9	10	10	10	10	10	10	7	7	7	7	7	6	7	7	7	7	7	7	26.2948	26.3668	26.6618	26.6046	26.4909	26.7761	26.2573	26.2811
	0.653264	-0.218014	Q9D6U8	Q9D6U8	Protein FAM162A	Fam162a	2	2	2	12.3	12.3	12.3	17.725	0.0009324	3.3069	20190000	16	2	2	2	2	2	2	2	2	2	2	2	2	2	2	2	2	2	2	2	2	2	2	2	2	21.0194	20.6627	21.1272	21.1198	21.2632	21.0804	20.9845	20.9735
	0.0559231	-0.0144545	Q9D819	Q9D819	Inorganic pyrophosphatase	Ppa1	11	11	11	66.1	66.1	66.1	32.667	0	90.568	606270000	114	9	10	8	11	10	11	8	9	10	10	10	10	9	10	8	11	10	11	8	9	10	10	10	10	25.784	25.8629	25.8447	25.9227	25.9389	25.6732	26.0072	26.0433
	0.205914	0.102037	Q9D880	Q9D880	Mitochondrial import inner membrane translocase subunit TIM50	Timm50	5	5	5	18.4	18.4	18.4	39.776	0	18.181	48496000	17	3	2	3	5	3	3	2	3	4	3	2	4	3	2	3	5	3	3	2	3	4	3	2	4	22.2366	22.4735	22.0684	22.4105	22.1745	21.8874	22.5017	22.2416
	0.137609	-0.0753886	Q9D892	Q9D892	Inosine triphosphate pyrophosphatase	Itpa	6	6	6	47.5	47.5	47.5	21.897	0	54.378	161960000	49	4	5	5	5	6	5	2	4	2	3	4	4	4	5	5	5	6	5	2	4	2	3	4	4	23.8665	24.0529	23.7815	24.0608	23.6197	24.2464	23.8139	23.8693
	0.693907	0.31871	Q9D898	Q9D898	Actin-related protein 2/3 complex subunit 5-like protein	Arpc5l	4	4	4	53.6	53.6	53.6	16.98	0	59.262	347770000	84	4	4	4	4	4	4	4	4	4	4	3	4	4	4	4	4	4	4	4	4	4	4	3	4	25.4755	25.0914	25.2522	25.2523	24.9712	24.6394	24.9679	25.0374
	0.560215	-0.267953	Q9D8B3	Q9D8B3	Charged multivesicular body protein 4b	Chmp4b	1	1	1	6.2	6.2	6.2	24.936	0	10.486	35315000	31	1	1	1	1	1	1	1	1	1	1	1	1	1	1	1	1	1	1	1	1	1	1	1	1	21.5731	21.2665	21.9343	21.6829	21.9534	21.9414	21.4125	21.5829
	0.0755441	-0.0171064	Q9D8E6	Q9D8E6	60S ribosomal protein L4	Rpl4	12	12	12	33.9	33.9	33.9	47.153	0	39.338	394980000	130	10	11	10	12	9	9	10	9	10	9	11	11	10	11	10	12	9	9	10	9	10	9	11	11	25.3186	25.3978	25.177	25.309	25.3982	25.2374	25.2421	25.1835
	0.479732	-0.0939725	Q9D8N0	Q9D8N0	Elongation factor 1-gamma	Eef1g	12	12	12	37.5	37.5	37.5	50.06	0	74.064	679930000	191	11	11	11	11	12	11	11	10	11	11	10	12	11	11	11	11	12	11	11	10	11	11	10	12	26.0697	25.9584	26.0757	25.9785	26.225	26.1822	26.0902	25.8663
	1.19038	-0.45586	Q9D8W5;B1AT36;Q3TRH2	Q9D8W5;B1AT36;Q3TRH2	26S proteasome non-ATPase regulatory subunit 12	Psmd12	4	4	4	9.6	9.6	9.6	52.895	0	13.401	40747000	9	4	2	3	2	2	2	3	2	1	3	3	3	4	2	3	2	2	2	3	2	1	3	3	3	21.9105	21.6661	21.3391	22.1617	21.953	22.1686	22.0152	22.2135
	0.0206894	0.00753975	Q9D8W7;A0A0J9YUI7;A0A0J9YU56;A0A0J9YU93	Q9D8W7;A0A0J9YUI7;A0A0J9YU56	OCIA domain-containing protein 2	Ociad2	5	5	5	42.2	42.2	42.2	16.925	0	20.864	107390000	20	5	5	5	5	4	5	5	5	4	5	5	4	5	5	5	5	4	5	5	5	4	5	5	4	23.5279	23.4016	23.4311	23.2392	23.461	23.6378	23.5124	23.622
	0.0817405	-0.03092	Q9DB05;A0A1B0GR35	Q9DB05	Alpha-soluble NSF attachment protein	Napa	14	11	11	54.9	43.4	43.4	33.189	0	64.372	288700000	52	9	8	9	9	8	7	9	8	7	9	8	9	9	8	9	9	8	7	9	8	7	9	8	9	24.928	24.9177	24.8126	24.7355	25.1653	24.8503	24.7133	24.8931
	0.168248	0.0547911	Q9DB15	Q9DB15	39S ribosomal protein L12, mitochondrial	Mrpl12	4	4	4	35.3	35.3	35.3	21.708	0	18.721	89524000	33	3	3	3	3	4	2	3	4	4	4	4	3	3	3	3	3	4	2	3	4	4	4	4	3	23.1194	23.0024	23.3354	22.9483	23.1648	23.1798	23.0173	23.1313
	0.0214688	0.00535647	Q9DB20;F6XVM5;F7D3P8	Q9DB20	ATP synthase subunit O, mitochondrial	Atp5o	11	11	11	59.6	59.6	59.6	23.363	0	229.46	2157300000	314	9	8	9	8	11	8	7	9	9	10	9	11	9	8	9	8	11	8	7	9	9	10	9	11	27.7764	27.7836	27.5704	27.6995	27.7854	27.6293	27.717	27.727
	0.103885	-0.0885258	Q9DB27;Q9DB27-2;Q9CQ21	Q9DB27;Q9DB27-2;Q9CQ21	Malignant T-cell-amplified sequence 1;Malignant T-cell-amplified sequence 2	Mcts1;Mcts2	5	5	5	47.5	47.5	47.5	20.555	0	21.094	71663000	13	4	4	4	5	4	2	2	5	4	4	5	2	4	4	4	5	4	2	2	5	4	4	5	2	22.4609	23.2101	22.7557	22.7524	22.6177	23.3222	22.7117	22.9703
	0.975352	-0.293692	Q9DB41-2;Q9DB41	Q9DB41-2;Q9DB41	Mitochondrial glutamate carrier 2	Slc25a18	6	3	3	19.6	10.3	10.3	33.304	0	25.94	48156000	31	2	2	3	2	3	3	2	2	2	3	2	3	2	2	3	2	3	3	2	2	2	3	2	3	22.2314	21.8714	22.2763	22.3702	22.3521	22.5378	22.1988	22.5533
	1.34017	-0.980672	Q9DB72	Q9DB72	BTB/POZ domain-containing protein 17	Btbd17	3	3	3	15.7	15.7	15.7	52.602	0	10.442	46377000	6	2	1	2	3	2	3	1	2	1	2	2	1	2	1	2	3	2	3	1	2	1	2	2	1	21.18	21.7675	22.1304	22.3328	22.6578	23.0293	22.0009	22.2859
	0.675466	-0.0848955	Q9DB77;A0A140LI98	Q9DB77	Cytochrome b-c1 complex subunit 2, mitochondrial	Uqcrc2	17	17	17	49.7	49.7	49.7	48.234	0	323.31	3123200000	823	17	15	16	15	16	14	15	15	14	14	17	15	17	15	16	15	16	14	15	15	14	14	17	15	28.1369	28.1733	28.222	28.1848	28.2424	28.3598	28.2325	28.2803
	0.280214	-0.142413	Q9DBC7;D3Z4L4;A2AI69;D3YTM5;D3Z068	Q9DBC7	cAMP-dependent protein kinase type I-alpha regulatory subunit;cAMP-dependent protein kinase type I-alpha regulatory subunit, N-terminally processed	Prkar1a	4	4	3	15.5	15.5	12.3	43.185	0	37.877	145220000	29	3	3	4	4	4	3	4	4	4	4	3	4	3	3	3	3	3	2	3	3	3	3	3	3	23.7654	23.5783	23.58	23.7599	24.1324	23.4586	23.7874	23.5769
	0.244563	-0.13561	Q9DBE8;F6RBY3	Q9DBE8	Alpha-1,3/1,6-mannosyltransferase ALG2	Alg2	8	8	8	33.7	33.7	33.7	47.404	0	34.247	258610000	24	6	6	6	7	7	6	5	7	8	6	7	5	6	6	6	7	7	6	5	7	8	6	7	5	24.6583	24.5359	24.673	24.8718	25.0597	24.3425	24.5893	25.0045
	0.196113	0.0324217	Q9DBF1-2;Q9DBF1;G3UYR8;G3UY72;E9Q1H3;E9Q1G1	Q9DBF1-2;Q9DBF1;G3UYR8	Alpha-aminoadipic semialdehyde dehydrogenase	Aldh7a1	15	15	15	47.7	47.7	47.7	55.644	0	108.5	809870000	100	13	13	12	13	10	7	9	12	11	13	13	12	13	13	12	13	10	7	9	12	11	13	13	12	26.3104	26.4555	26.3538	26.261	26.4229	26.3385	26.377	26.4602
	0.491165	0.0311489	Q9DBG3;Q9DBG3-2;H3BIY9;H3BKM0;H3BJ06;Q5SWR0	Q9DBG3;Q9DBG3-2;H3BIY9;H3BKM0	AP-2 complex subunit beta;AP complex subunit beta	Ap2b1	41	41	23	48.2	48.2	33.5	104.58	0	323.31	4494900000	1176	38	38	37	37	37	34	37	38	39	37	40	38	23	22	21	22	22	20	22	23	23	23	23	23	28.81	28.8055	28.782	28.7891	28.7991	28.7158	28.8181	28.6909
	0.646622	0.0710303	Q9DBJ1;O70250	Q9DBJ1	Phosphoglycerate mutase 1	Pgam1	17	17	17	74	74	74	28.832	0	323.31	9640500000	727	16	16	15	16	15	15	16	16	15	16	15	16	16	16	15	16	15	15	16	16	15	16	15	16	29.9262	29.8818	29.8222	29.8567	29.7281	29.8323	29.8488	29.7918
	0.208902	-0.060051	Q9DBP5;A0A0R4J093	Q9DBP5;A0A0R4J093	UMP-CMP kinase	Cmpk1	8	8	8	52.6	52.6	52.6	22.165	0	52.946	435060000	236	8	8	8	8	8	8	8	8	8	8	7	7	8	8	8	8	8	8	8	8	8	8	7	7	25.142	25.4677	25.1853	25.2732	25.4132	25.2889	25.3182	25.5461
	0.0175488	-0.00835609	Q9DBS2;B1AX95	Q9DBS2;B1AX95	Tumor protein p63-regulated gene 1-like protein	Tprg1l;Tprgl	9	9	9	53.4	53.4	53.4	29.814	0	89.18	173460000	53	7	6	7	7	5	4	5	5	5	6	6	8	7	6	7	7	5	4	5	5	5	6	6	8	23.8651	24.1398	23.9205	24.0184	23.7357	24.1962	24.1057	24.211
[truncated: 137 more rows]
[truncated: 4 more columns]

## Sheet: M_KO
Significant	neglog(p-val)	Log2(MKO/MWT)	Protein IDs	Majority protein IDs	Protein names	Gene names	Peptides	Razor + unique peptides	Unique peptides	Sequence coverage [%]	Unique + razor sequence coverage [%]	Unique sequence coverage [%]	Mol. weight [kDa]	Q-value	Score	Intensity	MS/MS count	Razor + unique peptides F_KO_02	Razor + unique peptides F_KO_05	Razor + unique peptides F_KO_09	Razor + unique peptides F_WT_04	Razor + unique peptides F_WT_08	Razor + unique peptides F_WT_11	Razor + unique peptides M_KO_03	Razor + unique peptides M_KO_07	Razor + unique peptides M_KO_12	Razor + unique peptides M_WT_01	Razor + unique peptides M_WT_06	Razor + unique peptides M_WT_10	Unique peptides F_KO_02	Unique peptides F_KO_05	Unique peptides F_KO_09	Unique peptides F_WT_04	Unique peptides F_WT_08	Unique peptides F_WT_11	Unique peptides M_KO_03	Unique peptides M_KO_07	Unique peptides M_KO_12	Unique peptides M_WT_01	Unique peptides M_WT_06	Unique peptides M_WT_10	LFQ intensity F_KO_02	LFQ intensity F_KO_05	LFQ intensity F_KO_09	LFQ intensity F_WT_04	LFQ intensity F_WT_08	LFQ intensity F_WT_11	LFQ intensity M_KO_03	LFQ intensity M_KO_07
[truncated: 1,546 more rows]
[truncated: 4 more columns]
