# Supplementary material for: Sex-Specific Proteomics Changes Induced by Genetic Deletion of the Fibroblast Growth Factor 14 (FGF14) Regulator of Neuronal Ion Channels
Source: Preprints.org preprint supplement (doi:10.20944/preprints201811.0463.v1), 2018-11-19
Supplement: Supplementary file 3 [file Table S2- Autism and Schizophrenia associated genes.xlsx]

## Sheet: Sheet2
	Gene Symbol	Negative logP Austism	Negative logP Schizophrenia
	FGF14	5.28719	5.91073
	SNAP25	2.19091	3.67764
	ACADVL	0	3.27388
	TPP1	1.9145	2.74422
	VAT1L	4.24912	2.43839
	IGSF5	6.00267	1.93652
	TSN	0	1.62834
	PRKAR2B	2.39289	1.50088
	ALDH1A1	4.01654	1.40632
	CALB2	2.7498	0
	CYCS	2.3005	0
	RBM3	1.63582	0
