# Supplementary material for: Sex-Specific Proteomics Changes Induced by Genetic Deletion of the Fibroblast Growth Factor 14 (FGF14) Regulator of Neuronal Ion Channels
Source: Preprints.org preprint supplement (doi:10.20944/preprints201811.0463.v1), 2018-11-19
Supplement: Supplementary file 4 [file Table S3- Group-specific protein clusters.xlsx]

## Sheet: M_KO
Protein IDs	Majority protein IDs	Protein names	Gene names
A0A0A6YY91	A0A0A6YY91		Ncam1
D3YWI0;E9Q2H8;E9PYA3;A0A0R4J052;G5E8T9;Q99KB8-2;Q99KB8;D3YUX8	D3YWI0;E9Q2H8;E9PYA3;A0A0R4J052;G5E8T9;Q99KB8-2;Q99KB8	Hydroxyacylglutathione hydrolase, mitochondrial	Hagh
A0A1B0GSG5;Q91VI7;A0A1B0GRG4;A0A1B0GRY7	A0A1B0GSG5;Q91VI7;A0A1B0GRG4	Ribonuclease inhibitor	Rnh1
A0A1C7CYV0;B1AX58;Q99K51;Q61233	A0A1C7CYV0;B1AX58;Q99K51	Plastin-3	Pls3
A0A1D5RLN6;A0A1B0GR85;Q8BRV5	A0A1D5RLN6;A0A1B0GR85;Q8BRV5	Uncharacterized protein KIAA1671	Kiaa1671
A2AFI4;A2AFI3;A0A2I3BRL8;Q9WV02-2;Q91VM5;Q9WV02;A0A2I3BQC0	A2AFI4;A2AFI3;A0A2I3BRL8;Q9WV02-2;Q91VM5;Q9WV02;A0A2I3BQC0	RNA-binding motif protein, X chromosome;RNA-binding motif protein, X chromosome, N-terminally processed;RNA binding motif protein, X-linked-like-1	Rbmx;Rbmxl1
A2A9S3;A2A9S2;A2A9R8;A2A9R6;Q8BVA9;A2A9S0;Q61701-2;Q61701;H3BLG7;A2A9R4;A2A9S1;A2A9R5	A2A9S3;A2A9S2;A2A9R8;A2A9R6;Q8BVA9;A2A9S0;Q61701-2;Q61701;H3BLG7;A2A9R4	ELAV-like protein;ELAV-like protein 4	Elavl4;Elavl2
A2AH25;Q5FWK3	A2AH25;Q5FWK3	Rho GTPase-activating protein 1	Arhgap1
B1AQF4;Q9D7X3;H3BKL8;Q3V2Y9;H3BKD1	B1AQF4;Q9D7X3;H3BKL8;Q3V2Y9;H3BKD1	Dual specificity protein phosphatase 3	Dusp3
B1AU25;Q9Z0X1	B1AU25;Q9Z0X1	Apoptosis-inducing factor 1, mitochondrial	Aifm1
D3YUP9;Q9R1V6-19;Q9R1V6-2;Q9R1V6-18;Q9R1V6-21;Q9R1V6-20;Q9R1V6-1;Q9R1V6-9;Q9R1V6-5;Q9R1V6-4;Q9R1V6-17;Q9R1V6-16;Q9R1V6-6;Q9R1V6;Q9R1V6-7;Q9R1V6-10;Q9R1V6-13;Q9R1V6-15;Q9R1V6-8;Q9R1V6-14;Q9R1V6-11;Q9R1V6-12;D3YUQ0	D3YUP9;Q9R1V6-19;Q9R1V6-2;Q9R1V6-18;Q9R1V6-21;Q9R1V6-20;Q9R1V6-1;Q9R1V6-9;Q9R1V6-5;Q9R1V6-4;Q9R1V6-17;Q9R1V6-16;Q9R1V6-6;Q9R1V6;Q9R1V6-7;Q9R1V6-10;Q9R1V6-13;Q9R1V6-15;Q9R1V6-8;Q9R1V6-14;Q9R1V6-11;Q9R1V6-12	Disintegrin and metalloproteinase domain-containing protein 22	Adam22
D3YUQ9;E9QN08;Q80T06;P57776;D3Z7N2;D3YZT9;A0A0R4J1L2;Q91VK2;A0A0R4J1E2;P57776-2;P57776-3;F6ZFU0;D3YY68	D3YUQ9;E9QN08;Q80T06;P57776;D3Z7N2;D3YZT9;A0A0R4J1L2;Q91VK2;A0A0R4J1E2;P57776-2;P57776-3;F6ZFU0	Elongation factor 1-delta	Eef1d
F8SLP9;D3YYH0;F8SLQ3;F8SLQ1;Q8C437;Q8C437-3;Q8C437-4	F8SLP9;D3YYH0;F8SLQ3;F8SLQ1;Q8C437;Q8C437-3;Q8C437-4	PEX5-related protein	Pex5l
F7CIP8;D3Z275;Q9CQF9	F7CIP8;D3Z275;Q9CQF9	Prenylcysteine oxidase	Pcyox1
D6RGM3;E9QK48;Q7TNG5;Q7TNG5-2	D6RGM3;E9QK48;Q7TNG5;Q7TNG5-2	Echinoderm microtubule-associated protein-like 2	Eml2
F6SFF5;Q8K1Z0	F6SFF5;Q8K1Z0	Ubiquinone biosynthesis protein COQ9, mitochondrial	Coq9
Q8C446;F6ZYH6;P63080	Q8C446;F6ZYH6;P63080	Gamma-aminobutyric acid receptor subunit beta-3	Gabrb3
H3BJU7;H3BJX8;H3BJ45;H3BJ40;H3BKH9;Q60875-5;Q60875-4;Q60875;Q60875-2;Q60875-3;H3BL15;H3BLF9;H3BJ59;H3BLJ1;H3BIX8	H3BJU7;H3BJX8;H3BJ45;H3BJ40;H3BKH9;Q60875-5;Q60875-4;Q60875;Q60875-2;Q60875-3	Rho guanine nucleotide exchange factor 2	Arhgef2
O54991	O54991	Contactin-associated protein 1	Cntnap1
O55026	O55026	Ectonucleoside triphosphate diphosphohydrolase 2	Entpd2
O55137;A0A1Y7VMZ4;Q32Q92-2;Q32Q92;Q9QYR7-2;Q9QYR7;Q91YQ6;Q6Q2Z6	O55137	Acyl-coenzyme A thioesterase 1	Acot1
P04925	P04925	Major prion protein	Prnp
P05132-2;P05132	P05132-2;P05132	cAMP-dependent protein kinase catalytic subunit alpha	Prkaca
P08551	P08551	Neurofilament light polypeptide	Nefl
P08752;A0A0A6YWA9;A2AE32;P20612;Q3V3I2;P50149;F6QPU5	P08752;A0A0A6YWA9	Guanine nucleotide-binding protein G(i) subunit alpha-2	Gnai2
P09528	P09528	Ferritin heavy chain;Ferritin heavy chain, N-terminally processed	Fth1
Q8CBB6;Q8CGP2;Q8CGP1;Q6ZWY9;Q64525;Q64478;Q64475;P10854;P10853;Q8CGP2-2;P70696	Q8CBB6;Q8CGP2;Q8CGP1;Q6ZWY9;Q64525;Q64478;Q64475;P10854;P10853;Q8CGP2-2	Histone H2B;Histone H2B type 1-P;Histone H2B type 1-K;Histone H2B type 1-C/E/G;Histone H2B type 2-B;Histone H2B type 1-H;Histone H2B type 1-B;Histone H2B type 1-M;Histone H2B type 1-F/J/L	Hist1h2br;Hist1h2bp;Hist1h2bk;Hist1h2bc;Hist2h2bb;Hist1h2bh;Hist1h2bb;Hist1h2bm;Hist1h2bf
P14094;A0A0A6YX05	P14094;A0A0A6YX05	Sodium/potassium-transporting ATPase subunit beta-1	Atp1b1
P17156	P17156	Heat shock-related 70 kDa protein 2	Hspa2
P18872-2	P18872-2	Guanine nucleotide-binding protein G(o) subunit alpha	Gnao1
P27048;P63163;A0A0G2JGN4	P27048;P63163	Small nuclear ribonucleoprotein-associated protein B;Small nuclear ribonucleoprotein-associated protein N	Snrpb;Snrpn
P27546-3;P27546-2;P27546;Q78TF3	P27546-3;P27546-2;P27546	Microtubule-associated protein 4	Map4
P28474;Q64437;A0A0G2JGS3	P28474	Alcohol dehydrogenase class-3	Adh5
P30416;F7CAT1;F6S2D5	P30416;F7CAT1;F6S2D5	Peptidyl-prolyl cis-trans isomerase FKBP4;Peptidyl-prolyl cis-trans isomerase FKBP4, N-terminally processed;Peptidyl-prolyl cis-trans isomerase	Fkbp4
P32020-2;P32020	P32020-2;P32020	Non-specific lipid-transfer protein	Scp2
P32037	P32037	Solute carrier family 2, facilitated glucose transporter member 3	Slc2a3
P40142;A0A286YE28	P40142;A0A286YE28	Transketolase	Tkt
P46660;P31001	P46660	Alpha-internexin	Ina
P47754;D6RCW7;A0A0N4SVM0	P47754;D6RCW7;A0A0N4SVM0	F-actin-capping protein subunit alpha-2	Capza2
P47962;D3YYV8	P47962;D3YYV8	60S ribosomal protein L5	Rpl5
P48758;A0A1B0GRG8	P48758	Carbonyl reductase [NADPH] 1	Cbr1
P50396;D6RI86;B7FAU8	P50396	Rab GDP dissociation inhibitor alpha	Gdi1
P50544;B1AR28	P50544;B1AR28	Very long-chain specific acyl-CoA dehydrogenase, mitochondrial	Acadvl
P52196	P52196	Thiosulfate sulfurtransferase	Tst
P62264;D3YVF4;D3Z7I1	P62264;D3YVF4;D3Z7I1	40S ribosomal protein S14	Rps14
P62267	P62267	40S ribosomal protein S23	Rps23
P62320	P62320	Small nuclear ribonucleoprotein Sm D3	Snrpd3
Q3TLP8;P63001;A0A2R8VHH0;Q05144	Q3TLP8;P63001	Ras-related C3 botulinum toxin substrate 1	Rac1
P63028;D3YU75	P63028;D3YU75	Translationally-controlled tumor protein	Tpt1
Z4YKV1;P63094-2;P63094;Q6R0H7-4;Q6R0H7;P63094-3	Z4YKV1;P63094-2;P63094;Q6R0H7-4;Q6R0H7;P63094-3	Guanine nucleotide-binding protein G(s) subunit alpha isoforms short;Guanine nucleotide-binding protein G(s) subunit alpha isoforms XLas	Gnas
Q06138	Q06138	Calcium-binding protein 39	Cab39
Q06185;Q8BTB6	Q06185;Q8BTB6	ATP synthase subunit e, mitochondrial	Atp5i;Atp5k
Q3UF95;Q9Z1R2;G3UYQ2;A0A1B0GX81;G3UZT6;G3UXT8;G3UYZ0;G3V013	Q3UF95;Q9Z1R2;G3UYQ2;A0A1B0GX81;G3UZT6	Large proline-rich protein BAG6	Bag6
Q3UHD9-2;Q3UHD9	Q3UHD9-2;Q3UHD9	Arf-GAP with GTPase, ANK repeat and PH domain-containing protein 2	Agap2
Q4VA93;P20444;Q3TQ39	Q4VA93;P20444	Protein kinase C;Protein kinase C alpha type	Prkca
Q5ICG5;Q8R1X1;Q91WC3;Q91WC3-2;Q5F2C5;Q8BYJ0;E9Q7Y2;Q8C028;F6WYN6;B0QZJ6;B1ARG5	Q5ICG5;Q8R1X1;Q91WC3;Q91WC3-2;Q5F2C5;Q8BYJ0;E9Q7Y2	Long-chain-fatty-acid--CoA ligase 6	Acsl6
Q5SXR6;Q68FD5	Q5SXR6;Q68FD5	Clathrin heavy chain;Clathrin heavy chain 1	Cltc
Q921L6;Q60598	Q921L6;Q60598	Src substrate cortactin	Cttn
Q60790	Q60790	Ras GTPase-activating protein 3	Rasa3
Q62348	Q62348	Translin	Tsn
Q62426	Q62426	Cystatin-B	Cstb
Q64133	Q64133	Amine oxidase [flavin-containing] A	Maoa
Q6PHN9;S4R1W7	Q6PHN9	Ras-related protein Rab-35	Rab35
Q6ZWZ7;Q9CPR4;B2RY53	Q6ZWZ7;Q9CPR4	60S ribosomal protein L17	Rpl17
Q80TJ1-4;Q80TJ1;K4DI76;J3QJW3	Q80TJ1-4;Q80TJ1;K4DI76;J3QJW3	Calcium-dependent secretion activator 1	Cadps
Q80VM5;Q5U4C2;E9PWX1;Q9Z218	Q80VM5;Q5U4C2;E9PWX1;Q9Z218	Dipeptidyl aminopeptidase-like protein 6	Dpp6
Q80VP1;Q80VP1-2;D3Z4V3;D3Z550	Q80VP1;Q80VP1-2	Epsin-1	Epn1
Q8BH59;V9GXX9	Q8BH59	Calcium-binding mitochondrial carrier protein Aralar1	Slc25a12
Q8BNW9	Q8BNW9	Kelch repeat and BTB domain-containing protein 11	Kbtbd11
Q8BR92	Q8BR92	Paralemmin-2	Palm2
Q8CAA7;E0CX81	Q8CAA7	Glucose 1,6-bisphosphate synthase	Pgm2l1
Q8CI94;Q3UEJ6	Q8CI94	Glycogen phosphorylase, brain form	Pygb
Q8K021;Q3TSA8;D3YTP4	Q8K021;Q3TSA8	Secretory carrier-associated membrane protein 1	Scamp1
Q8K0U4	Q8K0U4	Heat shock 70 kDa protein 12A	Hspa12a
Q8R3P0;V9GXG0;B0QZP3;D6RJ20	Q8R3P0;V9GXG0	Aspartoacylase	Aspa
Q8R5L1;O35658	Q8R5L1;O35658	Complement component 1 Q subcomponent-binding protein, mitochondrial	C1qbp
Q8VDM6-3;Q8VDM6	Q8VDM6-3;Q8VDM6	Heterogeneous nuclear ribonucleoprotein U-like protein 1	Hnrnpul1
Q8VEH5	Q8VEH5	EPM2A-interacting protein 1	Epm2aip1
Q91V14-2;Q91V14;A0A076FR46;Q6P6P5;Q3V0N8;Q924N4-2;Q924N4;A0A0J9YU26;A0A0J9YV84;F8WIJ0;Q9JIS8	Q91V14-2;Q91V14;A0A076FR46	Solute carrier family 12 member 5	Slc12a5
Q922H2	Q922H2	[Pyruvate dehydrogenase (acetyl-transferring)] kinase isozyme 3, mitochondrial	Pdk3
Q99KP3	Q99KP3	Lambda-crystallin homolog	Cryl1
Q9CPQ8;J3QNM7	Q9CPQ8	ATP synthase subunit g, mitochondrial	Atp5l
Q9CQQ7;A0A0G2JGX3	Q9CQQ7	ATP synthase F(0) complex subunit B1, mitochondrial	Atp5f1
Q9CQR2	Q9CQR2	40S ribosomal protein S21	Rps21
Q9CQV6;M0QWC2	Q9CQV6;M0QWC2	Microtubule-associated proteins 1A/1B light chain 3B	Map1lc3b
Q9CQZ5;A0A2R8W6V1;A0A2R8VI90	Q9CQZ5	NADH dehydrogenase [ubiquinone] 1 alpha subcomplex subunit 6	Ndufa6
Q9CR57;A0A1L1SUF6	Q9CR57;A0A1L1SUF6	60S ribosomal protein L14	Rpl14
Q9CRY7	Q9CRY7	Glycerophosphodiester phosphodiesterase domain-containing protein 1	Gdpd1
Q9CZR8;Q9CX33	Q9CZR8	Elongation factor Ts, mitochondrial	Tsfm
Q9DB41-2;Q9DB41	Q9DB41-2;Q9DB41	Mitochondrial glutamate carrier 2	Slc25a18
Q9DB77;A0A140LI98	Q9DB77	Cytochrome b-c1 complex subunit 2, mitochondrial	Uqcrc2
Q9DCC5;D3Z313;P23198;D3Z1A9	Q9DCC5;D3Z313;P23198;D3Z1A9	Chromobox protein homolog 3	Cbx3
Q9DCJ5	Q9DCJ5	NADH dehydrogenase [ubiquinone] 1 alpha subcomplex subunit 8	Ndufa8
Q9EQ20;A0A1Y7VJ32	Q9EQ20	Methylmalonate-semialdehyde dehydrogenase [acylating], mitochondrial	Aldh6a1
Q9JJI8	Q9JJI8	60S ribosomal protein L38	Rpl38
Q9JJU8	Q9JJU8	SH3 domain-binding glutamic acid-rich-like protein	Sh3bgrl
Q9JK42	Q9JK42	[Pyruvate dehydrogenase (acetyl-transferring)] kinase isozyme 2, mitochondrial	Pdk2
Q9R0P5	Q9R0P5	Destrin	Dstn
Q9R1V7-2;Q9R1V7;Q9R1V7-3;Q9R1V7-4	Q9R1V7-2;Q9R1V7;Q9R1V7-3;Q9R1V7-4	Disintegrin and metalloproteinase domain-containing protein 23	Adam23
Q9WV34;Q9WV34-2	Q9WV34;Q9WV34-2	MAGUK p55 subfamily member 2	Mpp2
Q9Z1A1;B8JJG9;B8JJG7;B8JJG8;B8JJG6;B8JJG3;F6QJV5	Q9Z1A1;B8JJG9;B8JJG7;B8JJG8;B8JJG6		Tfg
Q9Z1D1	Q9Z1D1	Eukaryotic translation initiation factor 3 subunit G	Eif3g
Q9Z1Z2	Q9Z1Z2	Serine-threonine kinase receptor-associated protein	Strap
Q9Z2I9	Q9Z2I9	Succinyl-CoA ligase [ADP-forming] subunit beta, mitochondrial	Sucla2

## Sheet: M_WT
Protein IDs	Majority protein IDs	Protein names	Gene names
A0A087WPR1;P20917-2;P20917;Q3ZB60;A0A087WRD6	A0A087WPR1;P20917-2;P20917;Q3ZB60	Myelin-associated glycoprotein	Mag
A0A087WS96;Q8BG73	A0A087WS96;Q8BG73	SH3 domain-binding glutamic acid-rich-like protein;SH3 domain-binding glutamic acid-rich-like protein 2	Sh3bgrl2
A0A0A0MQA5;P68368;A0A087WQS4;A0A087WRB4;A0A087WSB0;A0A087WSL5;Q3UX10;A0A087WS35	A0A0A0MQA5;P68368	Tubulin alpha-4A chain	Tuba4a
Q80XD3;A0A0A6YW36;O54829;Q45FE1;Q45FE2	Q80XD3;A0A0A6YW36;O54829;Q45FE1;Q45FE2	Regulator of G-protein signaling 7	Rgs7
A0A0A6YX26;P62900	A0A0A6YX26;P62900	60S ribosomal protein L31	Rpl31
A0A0A6YX73;Q8K1M3;P12367;A0A0A6YY28	A0A0A6YX73;Q8K1M3;P12367	cAMP-dependent protein kinase type II-alpha regulatory subunit	Prkar2a
A0A0J9YVF0;Q14BI2	A0A0J9YVF0;Q14BI2	Metabotropic glutamate receptor 2	Grm2
J3QMN4;A0A0U1RPV8;A0A0U1RQA4;J3QMQ8;A0A0M3HEQ0;Q9JLT4-2;Q9JLT4-4;Q9JLT4;A0A0M3HEP9;D3Z0K8;Q9JLT4-3;Q9D8I4;A0A0U1RPS1;A0A0U1RPC6	J3QMN4;A0A0U1RPV8;A0A0U1RQA4;J3QMQ8;A0A0M3HEQ0;Q9JLT4-2;Q9JLT4-4;Q9JLT4;A0A0M3HEP9;D3Z0K8;Q9JLT4-3;Q9D8I4;A0A0U1RPS1;A0A0U1RPC6	Thioredoxin reductase 2, mitochondrial	Txnrd2
A0A0U1RNT6;A0A0U1RNK6;Q3THS6;A0A0U1RQ95;A0A0U1RQB0;Q91X83	A0A0U1RNT6;A0A0U1RNK6;Q3THS6;A0A0U1RQ95	S-adenosylmethionine synthase isoform type-2	Mat2a
A0A1L1STE6;Q9D6R2;Q9D6R2-2	A0A1L1STE6;Q9D6R2;Q9D6R2-2	Isocitrate dehydrogenase [NAD] subunit alpha, mitochondrial	Idh3a
Q6ZWZ6;F7AEH4;A0A1W2P7A1;P63323	Q6ZWZ6;F7AEH4;A0A1W2P7A1;P63323	40S ribosomal protein S12	Rps12
A0A1Y7VNC1;A0A1Y7VJZ2;Q9WVL0	A0A1Y7VNC1;A0A1Y7VJZ2;Q9WVL0	Maleylacetoacetate isomerase	Gstz1
A0A1Y7VM38;P52503;A0A1Y7VKP8	A0A1Y7VM38;P52503;A0A1Y7VKP8	NADH dehydrogenase [ubiquinone] iron-sulfur protein 6, mitochondrial	Ndufs6
A0A1Y7VN70;Q80Y14	A0A1Y7VN70;Q80Y14	Glutaredoxin-related protein 5, mitochondrial	Glrx5
A0A2C9F2D2;Q07076;A0A286YCW4	A0A2C9F2D2;Q07076	Annexin A7	Anxa7
A2AFG7;A2AFG8;Q6PGJ3;P11627;F7A5H7;B7ZCD3;F6UIL7	A2AFG7;A2AFG8;Q6PGJ3;P11627	Neural cell adhesion molecule L1	L1cam
A2ALS4;A2ALS5;A2ALS5-4;A2ALS5-3;A2ALS5-2;A2ALS3;A2ALS2	A2ALS4;A2ALS5;A2ALS5-4;A2ALS5-3;A2ALS5-2	Rap1 GTPase-activating protein 1	Rap1gap
A2AMH3;A2AMH5;A2AMH4;Q6X893;Q6X893-2;A2AMH8	A2AMH3;A2AMH5;A2AMH4;Q6X893;Q6X893-2	Choline transporter-like protein 1	Slc44a1
A2APL5;P43006-3;F7CAM6;F6ZRK3;A2AQI7	A2APL5;P43006-3	Amino acid transporter;Excitatory amino acid transporter 2	Slc1a2
F7BNZ5;A2AVX1;E9Q8Q5;Q80YN3	F7BNZ5;A2AVX1;E9Q8Q5;Q80YN3	Breast carcinoma-amplified sequence 1 homolog	Bcas1
B0V2N1-4;B0V2N1-3;B0V2N1-6;B0V2N1-2;B0V2N1;B0V2N1-5;A0A286YEA4;A0A286YDS2;A0A286YDF6	B0V2N1-4;B0V2N1-3;B0V2N1-6;B0V2N1-2;B0V2N1;B0V2N1-5	Receptor-type tyrosine-protein phosphatase S	Ptprs
B1AQX6;B1AQX7;B1AQX9;Q9QWI6-3;Q9QWI6-2;Q9QWI6;B1AQX8	B1AQX6;B1AQX7;B1AQX9;Q9QWI6-3;Q9QWI6-2;Q9QWI6	SRC kinase signaling inhibitor 1	Srcin1
B1AWV9;Q5DTL9-2;Q5DTL9	B1AWV9;Q5DTL9-2;Q5DTL9	Anion exchange protein;Sodium-driven chloride bicarbonate exchanger	Slc4a10
B2RXT3;E9Q7L0	B2RXT3;E9Q7L0		Ogdhl
B7ZCB8;F7CJY7;F6X4N5;Q8BVI5;B7ZCB9	B7ZCB8;F7CJY7;F6X4N5;Q8BVI5;B7ZCB9	Syntaxin-16	Stx16
H3BIV5;D3YVF0	H3BIV5;D3YVF0	A-kinase anchor protein 5	Akap5
D3YXH0;P63054	D3YXH0;P63054	Purkinje cell protein 4	Igsf5;Pcp4
D3Z3B8;E9Q9H0;H7BWY4;Q811D0-2;Q811D0;Q811D0-3;F6UDT8;S4R2T8	D3Z3B8;E9Q9H0;H7BWY4;Q811D0-2;Q811D0;Q811D0-3;F6UDT8	Disks large homolog 1	Dlg1
Q3TT92;E9PWE8;Q62188;D3YUS0;D3Z567	Q3TT92;E9PWE8;Q62188	Dihydropyrimidinase-related protein 3	Dpysl3
E9PZ00;Q8BFQ1;K3W4L3;J3QPG5;Q61207	E9PZ00;Q8BFQ1;K3W4L3;J3QPG5;Q61207	Prosaposin	Psap
E9PZS5;Q8C163	E9PZS5;Q8C163	Nuclease EXOG, mitochondrial	Exog
E9Q9F5;E9Q1G8;O55131;A0A0R4J233;A0A1W2P6J7;Q8C650-2;Q8C650	E9Q9F5;E9Q1G8;O55131	Septin-7	2018-09-07
E9Q2E4;Q6GQX8	E9Q2E4;Q6GQX8		Gm15800
F7AAP4;E9Q828;Q6Q477-2;Q6Q477	F7AAP4;E9Q828;Q6Q477-2;Q6Q477	Calcium-transporting ATPase	Atp2b4
Q3UHH4;E9QKC6;Q9ESN6;D3YTN5;D3YY69;D3YZJ0	Q3UHH4;E9QKC6;Q9ESN6	Tripartite motif-containing protein 2	Trim2
Q3TQZ7;Q80W82;Q8C9D4;Q80W80;E9QN59;Q61831-2;Q61831;A0A0G2JEJ8;A0A0G2JGL2;A6P3E4;Q7TSJ7;G3X8U9;Q91Y86	Q3TQZ7;Q80W82;Q8C9D4;Q80W80;E9QN59;Q61831-2;Q61831	Mitogen-activated protein kinase;Mitogen-activated protein kinase 10	Mapk10
G3X9H5;P42859-2;P42859	G3X9H5;P42859-2;P42859	Huntingtin	Htt
G3X9Q2;Q61016	G3X9Q2;Q61016	Guanine nucleotide-binding protein subunit gamma;Guanine nucleotide-binding protein G(I)/G(S)/G(O) subunit gamma-7	Gng7
H3BKQ7;H3BJD0;H3BL28;Q7TN74;H3BJD6;Q3UXW4;Q8BMP0;H3BKE7	H3BKQ7;H3BJD0;H3BL28;Q7TN74;H3BJD6;Q3UXW4;Q8BMP0;H3BKE7		Ppp1r9a
O08599;A0A140LHJ4	O08599	Syntaxin-binding protein 1	Stxbp1
O08915	O08915	AH receptor-interacting protein	Aip
O35857	O35857	Mitochondrial import inner membrane translocase subunit TIM44	Timm44
O54984	O54984	ATPase Asna1	Asna1
Q8BGR3;P08414	Q8BGR3;P08414	Calcium/calmodulin-dependent protein kinase type IV	Camk4
P09103;E9Q8G8	P09103	Protein disulfide-isomerase	P4hb
P10518	P10518	Delta-aminolevulinic acid dehydratase	Alad
P10637-2;A0A0A0MQC7;A2A5Y6;P10637	P10637-2;A0A0A0MQC7;A2A5Y6;P10637	Microtubule-associated protein tau;Microtubule-associated protein	Mapt
P12787	P12787	Cytochrome c oxidase subunit 5A, mitochondrial	Cox5a
P17183;A0A0N4SUX5;D3Z6E4;D3Z2S4;D3YVD3	P17183;A0A0N4SUX5;D3Z6E4	Gamma-enolase;Enolase	Eno2
P20029	P20029	78 kDa glucose-regulated protein	Hspa5
P26516	P26516	26S proteasome non-ATPase regulatory subunit 7	Psmd7
Q8C483;P26638;A2AFS0;A2AFS1	Q8C483;P26638;A2AFS0	Serine--tRNA ligase, cytoplasmic	Sars
P26645	P26645	Myristoylated alanine-rich C-kinase substrate	Marcks
P28738;P33175;A2ARD4	P28738	Kinesin heavy chain isoform 5C	Kif5c
P29341;Q9D4E6;Q62029;F6ZAX1;A0A2I3BR37;Q91YZ8;A3KFU5;A3KFU8;Q6PHQ9;A2A5N3;V9GXG3	P29341;Q9D4E6	Polyadenylate-binding protein 1;Polyadenylate-binding protein	Pabpc1;Pabpc6
P31324;H3BK84	P31324;H3BK84	cAMP-dependent protein kinase type II-beta regulatory subunit	Prkar2b
P35486	P35486	Pyruvate dehydrogenase E1 component subunit alpha, somatic form, mitochondrial	Pdha1
P35505;D3Z2R9	P35505	Fumarylacetoacetase	Fah
P48036;A0A0G2JGQ0	P48036	Annexin A5	Anxa5
P48722;P48722-2;E0CY23;A0A0N4SVU2;A0A0N4SW76	P48722;P48722-2;E0CY23	Heat shock 70 kDa protein 4L	Hspa4l
P50114	P50114	Protein S100-B	S100b
Q3U4W8;P56399;D3Z4K7;D3YYA5	Q3U4W8;P56399	Ubiquitin carboxyl-terminal hydrolase;Ubiquitin carboxyl-terminal hydrolase 5	Usp5
P58281;P58281-2;H7BX01;E0CXD1;F6U775;P58682	P58281;P58281-2;H7BX01;E0CXD1	Dynamin-like 120 kDa protein, mitochondrial;Dynamin-like 120 kDa protein, form S1	Opa1
P60766	P60766	Cell division control protein 42 homolog	Cdc42
P61329-2;P61329;A0A0R4J063;O89096;P70379-2;P70379	P61329-2;P61329	Fibroblast growth factor 12	Fgf12
P62838;A0A0G2JE32;A0A0G2JGL0;P61079;Q6ZWY6	P62838;A0A0G2JE32;A0A0G2JGL0;P61079	Ubiquitin-conjugating enzyme E2 D2;Ubiquitin-conjugating enzyme E2 D3	Ube2d2;Ube2d3
Q642K5;P62862	Q642K5;P62862	40S ribosomal protein S30	Fau
P63038;P63038-2;D3Z2F2;D3Z7J9	P63038	60 kDa heat shock protein, mitochondrial	Hspd1
P63087;P63087-2;A0A0G2JGC1;A0A0G2JFF1	P63087;P63087-2;A0A0G2JGC1;A0A0G2JFF1	Serine/threonine-protein phosphatase PP1-gamma catalytic subunit	Ppp1cc
P68181-2;P68181-3;P68181;P68181-4;A0A0G2JFT9;H6TMF5	P68181-2;P68181-3;P68181;P68181-4	cAMP-dependent protein kinase catalytic subunit beta	Prkacb
P68372;G3UZR1	P68372	Tubulin beta-4B chain	Tubb4b
Q3UGN9;P70297;A2ARJ0;A0A0A6YVP6	Q3UGN9;P70297	Signal transducing adapter molecule 1	Stam
P70349;B0R1E3	P70349;B0R1E3	Histidine triad nucleotide-binding protein 1	Hint1
P97315	P97315	Cysteine and glycine-rich protein 1	Csrp1
P97807-2;P97807;H3BKG7	P97807-2;P97807	Fumarate hydratase, mitochondrial	Fh
P99024	P99024	Tubulin beta-5 chain	Tubb5
P99027	P99027	60S acidic ribosomal protein P2	Rplp2
Q00623;CON__P15497	Q00623	Apolipoprotein A-I;Proapolipoprotein A-I;Truncated apolipoprotein A-I	Apoa1
Q01853	Q01853	Transitional endoplasmic reticulum ATPase	Vcp
Q03265;D3Z6F5;D6RJ16	Q03265;D3Z6F5	ATP synthase subunit alpha, mitochondrial;ATP synthase subunit alpha	Atp5a1
Q03517;Q4W8U9	Q03517;Q4W8U9	Secretogranin-2;Secretoneurin;Manserin	Scg2
Q04447	Q04447	Creatine kinase B-type	Ckb
Q08642	Q08642	Protein-arginine deiminase type-2	Padi2
Q3TU36	Q3TU36		Rap1gds1
Q3UM45;F6TGJ2;A0A087WRA7	Q3UM45	Protein phosphatase 1 regulatory subunit 7	Ppp1r7
Q3V117;Q91V92;Q3TS02	Q3V117;Q91V92	ATP-citrate synthase	Acly
Q5EBJ4	Q5EBJ4	Ermin	Ermn
Q5SW88;Q5SW87;P62821;Q5SW86	Q5SW88;Q5SW87;P62821;Q5SW86	Ras-related protein Rab-1A	Rab1;Rab1A
Q60864	Q60864	Stress-induced-phosphoprotein 1	Stip1
Q61036-2;Q61036;A3KGC5;A3KGC3;A3KGC4;A3KGC2	Q61036-2;Q61036;A3KGC5	Serine/threonine-protein kinase PAK 3	Pak3
Q62433;E9Q514;E9Q5I8;E9Q3F9;E9PVF3;E9Q0J8;E9PZC7;E9Q7G8;E9Q147;E9Q7V2;F6VLR8	Q62433;E9Q514	Protein NDRG1	Ndrg1
Q62465	Q62465	Synaptic vesicle membrane protein VAT-1 homolog	Vat1
Q6ZQ38;D3YWC5;Q6ZQ73	Q6ZQ38	Cullin-associated NEDD8-dissociated protein 1	Cand1
Q792Z1	Q792Z1		Try10
Q7TMD7	Q7TMD7	Desmoglein-4	Dsg4
Q80TB8;D3Z434	Q80TB8	Synaptic vesicle membrane protein VAT-1 homolog-like	Vat1l
Q80TL4;Q80TL4-2;F6SBE4;S4R1R0;S4R193;S4R202	Q80TL4;Q80TL4-2	Protein KIAA1045	Kiaa1045
Q8BI08	Q8BI08	Protein MAL2	Mal2
Q8BTG7;Q8BTG7-2;Q8BTG7-3;E0CZ50;A0A1D5RMH3;A0A1D5RM17	Q8BTG7;Q8BTG7-2;Q8BTG7-3;E0CZ50	Protein NDRG4	Ndrg4
Q8BWT1	Q8BWT1	3-ketoacyl-CoA thiolase, mitochondrial	Acaa2
Q8C845;Q9D8Y0;Q9D4J1	Q8C845;Q9D8Y0	EF-hand domain-containing protein D2	Efhd2
Q8CBY8-2;Q8CBY8	Q8CBY8-2;Q8CBY8	Dynactin subunit 4	Dctn4
Q8JZN5;A0A0G2JDY4;A0A0G2JF25	Q8JZN5	Acyl-CoA dehydrogenase family member 9, mitochondrial	Acad9
Q8R016;E9Q6V3;E9PZH4;E9PY26	Q8R016;E9Q6V3;E9PZH4	Bleomycin hydrolase	Blmh
Q8R081;G3UY38	Q8R081;G3UY38	Heterogeneous nuclear ribonucleoprotein L	Hnrnpl
Q8R5C5;E0CZD4;E0CYB4	Q8R5C5;E0CZD4;E0CYB4	Beta-centractin	Actr1b
Q8VCD6	Q8VCD6	Receptor expression-enhancing protein 2	Reep2
Q921H8;Q8VCH0;H3BJZ9;H3BKL5;H3BKA1	Q921H8;Q8VCH0;H3BJZ9;H3BKL5	3-ketoacyl-CoA thiolase A, peroxisomal;3-ketoacyl-CoA thiolase B, peroxisomal	Acaa1a;Acaa1b
S4R225;Q91V09;A2AC24	S4R225;Q91V09;A2AC24	WD repeat-containing protein 13	Wdr13
Q91V77;P56565;D3YUT6	Q91V77;P56565	Protein S100;Protein S100-A1	S100a1
Q91VB8;P01942;CON__P01966;A7M7S6;P06467	Q91VB8;P01942	Hemoglobin subunit alpha	haemaglobin alpha 2;Hba
Q91Z53;D6REG4;B1AXQ0	Q91Z53;D6REG4	Glyoxylate reductase/hydroxypyruvate reductase	Grhpr
Q922Q1;E0CZH6	Q922Q1;E0CZH6	Mitochondrial amidoxime reducing component 2	2018-03-02
Q922Q8	Q922Q8	Leucine-rich repeat-containing protein 59	Lrrc59
Q99JR1	Q99JR1	Sideroflexin-1	Sfxn1
Q99LX0;A2A815;A2A813;A2A817;A2A816	Q99LX0;A2A815;A2A813;A2A817;A2A816	Protein deglycase DJ-1	Park7
Q9CQE8	Q9CQE8	UPF0568 protein C14orf166 homolog
Q9CQJ6;E9Q0G1	Q9CQJ6;E9Q0G1	Density-regulated protein	Denr
Q9CQW1	Q9CQW1	Synaptobrevin homolog YKT6	Ykt6
Q9CQZ1	Q9CQZ1	Heat shock factor-binding protein 1	Hsbp1
Q9CR86	Q9CR86	Calcium-regulated heat stable protein 1	Carhsp1
Q9CRB6	Q9CRB6	Tubulin polymerization-promoting protein family member 3	Tppp3
Q9CRB9;S4R238;F6QFL0;Q9D9P1;D3Z0L4	Q9CRB9;S4R238;F6QFL0;Q9D9P1;D3Z0L4	MICOS complex subunit Mic19	Chchd3
Q9CZ13;A0A0A6YWX6;A0A0A6YW82	Q9CZ13	Cytochrome b-c1 complex subunit 1, mitochondrial	Uqcrc1
Q9CZ44;Q9CZ44-3;A2AT02;Q9CZ44-2	Q9CZ44;Q9CZ44-3;A2AT02;Q9CZ44-2	NSFL1 cofactor p47	Nsfl1c
Q9D394;A0A0G2JFT8;Q9D394-3;Q9D394-4;Q9D394-2	Q9D394;A0A0G2JFT8;Q9D394-3;Q9D394-4;Q9D394-2	Protein RUFY3	Rufy3
Q9D6J6;Q9D6J6-2;M0QWP9;D6RGN4	Q9D6J6;Q9D6J6-2	NADH dehydrogenase [ubiquinone] flavoprotein 2, mitochondrial	Ndufv2
Q9DB15	Q9DB15	39S ribosomal protein L12, mitochondrial	Mrpl12
Q9DBP5;A0A0R4J093	Q9DBP5;A0A0R4J093	UMP-CMP kinase	Cmpk1
Q9DCT8;A0A0G2JF37	Q9DCT8	Cysteine-rich protein 2	Crip2
Q9EPL8	Q9EPL8	Importin-7	Ipo7
Q9EQF6;Q3SYJ1	Q9EQF6	Dihydropyrimidinase-related protein 5	Dpysl5
Q9ERD7;A0A1D5RM76	Q9ERD7	Tubulin beta-3 chain	Tubb3
Q9ES97-3	Q9ES97-3	Reticulon-3	Rtn3
Q9JHU4;F6ZX84	Q9JHU4	Cytoplasmic dynein 1 heavy chain 1	Dync1h1
Q9JME5;A0A140LHP9	Q9JME5	AP-3 complex subunit beta-2	Ap3b2
Q9JMG7;Q9JMG7-2;Q3UMU9-4;Q3UMU9-2;Q3UMU9;Q3UMU9-3	Q9JMG7;Q9JMG7-2	Hepatoma-derived growth factor-related protein 3	Hdgfrp3
Q9JMH6-2;Q9JMH6;A0A1W2P6U1	Q9JMH6-2;Q9JMH6	Thioredoxin reductase 1, cytoplasmic	Txnrd1
Q9R1T4-2;Q9R1T4-3;Q9R1T4;A2A3W1	Q9R1T4-2;Q9R1T4-3;Q9R1T4	Septin-6	2018-09-06
Q9WTR5	Q9WTR5	Cadherin-13	Cdh13
Q9WUB3;E9PUM3;Q9ET01	Q9WUB3;E9PUM3	Glycogen phosphorylase, muscle form;Alpha-1,4 glucan phosphorylase	Pygm
Q9WUK2-2;Q9WUK2	Q9WUK2-2;Q9WUK2	Eukaryotic translation initiation factor 4H	Eif4h
Q9WV54;D3Z505	Q9WV54	Acid ceramidase;Acid ceramidase subunit alpha;Acid ceramidase subunit beta	Asah1

## Sheet: F_KO
Protein IDs	Majority protein IDs	Protein names	Gene names
D3Z0U5;D6RGM7;D3Z4J2;A0A0G2JFY0;A0A0A0MQ80;Q9D3R6-3;Q9D3R6;Q3UMC0	D3Z0U5;D6RGM7;D3Z4J2;A0A0G2JFY0;A0A0A0MQ80;Q9D3R6-3;Q9D3R6;Q3UMC0	Katanin p60 ATPase-containing subunit A-like 2;Spermatogenesis-associated protein 5	Katnal2;Spata5
A0A0R3P9C8;Q9DC69	A0A0R3P9C8;Q9DC69	NADH dehydrogenase [ubiquinone] 1 alpha subcomplex subunit 9, mitochondrial	Ndufa9
A0A0R4J0I9;Q91ZX7;Q3U5J2	A0A0R4J0I9;Q91ZX7	Prolow-density lipoprotein receptor-related protein 1;Low-density lipoprotein receptor-related protein 1 85 kDa subunit;Low-density lipoprotein receptor-related protein 1 515 kDa subunit;Low-density lipoprotein receptor-related protein 1 intracellular domain	Lrp1
A0A0R4J1F4;A2AGR0;A2AGQ6;E9QN47;Q80U28-3;Q80U28-15;Q80U28;Q80U28-14;A2AGR1;A2AGQ3;A2AGQ8;A2AGQ4;Q80U28-2;A2AGQ2;A2AGQ7;A2AGQ9;A2AGQ5;Q80U28-11;Q80U28-8;Q80U28-7;Q80U28-6;Q80U28-5;Q80U28-4;A6PWP8;Q80U28-13;Q80U28-12;Q80U28-10;Q80U28-9;A6PWP7	A0A0R4J1F4;A2AGR0;A2AGQ6;E9QN47;Q80U28-3;Q80U28-15;Q80U28;Q80U28-14;A2AGR1;A2AGQ3;A2AGQ8;A2AGQ4;Q80U28-2;A2AGQ2;A2AGQ7;A2AGQ9;A2AGQ5;Q80U28-11;Q80U28-8;Q80U28-7;Q80U28-6;Q80U28-5;Q80U28-4;A6PWP8;Q80U28-13;Q80U28-12;Q80U28-10;Q80U28-9	MAP kinase-activating death domain protein	Madd
A0A171EBK8;Q5SVL6-2;Q5SVL6	A0A171EBK8;Q5SVL6-2;Q5SVL6	Rap1 GTPase-activating protein 2	Rap1gap2
Q564E2;A0A1B0GSX0;P06151;A0A1B0GSR9;D3YZQ9;A0A1B0GT41;A0A1B0GQX5;A0A1B0GSL7;A0A1B0GRW9;A0A1B0GS79;A0A1B0GRC1;A0A1B0GRS2;D3YVR7;D3YZE4;P00342;A0A1B0GSR2;A0A1B0GRE9	Q564E2;A0A1B0GSX0;P06151;A0A1B0GSR9;D3YZQ9;A0A1B0GT41;A0A1B0GQX5	L-lactate dehydrogenase;L-lactate dehydrogenase A chain	Ldha
A0A1L1SUX8;P01831	A0A1L1SUX8;P01831	Thy-1 membrane glycoprotein	Thy1
A0A286YDI8;G3X972;A0A286YD08	A0A286YDI8;G3X972;A0A286YD08		Sec24c
A0A2I3BQF4;P62889	A0A2I3BQF4;P62889	60S ribosomal protein L30	Rpl30
A2A9X5;Q9JM14	A2A9X5;Q9JM14	5(3)-deoxyribonucleotidase, cytosolic type	Nt5c
A2AP32;Q3UIU2	A2AP32;Q3UIU2	NADH dehydrogenase [ubiquinone] 1 beta subcomplex subunit 6	Ndufb6
F6XJA1;G8JL68;A2ATP5;A2ATP6;Q8C854-2;Q8C854-3;Q8C854;Q8C854-1	F6XJA1;G8JL68;A2ATP5;A2ATP6;Q8C854-2;Q8C854-3;Q8C854;Q8C854-1	Myelin expression factor 2	Myef2
A2RT62	A2RT62	F-box/LRR-repeat protein 16	Fbxl16
B1ARA3;B1ARA5;P61255	B1ARA3;B1ARA5;P61255	60S ribosomal protein L26	Rpl26
B1AT92;Q60631;Q60631-2;B1AT95	B1AT92;Q60631;Q60631-2	Growth factor receptor-bound protein 2	Grb2
B1AV77;B1ATI0;P47740;A0A140LJF9;P47739	B1AV77;B1ATI0;P47740	Aldehyde dehydrogenase;Fatty aldehyde dehydrogenase	Aldh3a2
B1B1A8;Q6PDN3;Q6PDN3-2;Q6PDN3-3	B1B1A8;Q6PDN3;Q6PDN3-2;Q6PDN3-3	Myosin light chain kinase, smooth muscle;Myosin light chain kinase, smooth muscle, deglutamylated form	Mylk
D3YYD5;D3Z645;Q9QZ88;Q9QZ88-2;D3YW98	D3YYD5;D3Z645;Q9QZ88;Q9QZ88-2	Vacuolar protein sorting-associated protein 29	Vps29
D3Z0F5;O88545;F6QK86	D3Z0F5;O88545;F6QK86	COP9 signalosome complex subunit 6	Cops6
D3Z0M6;O88485-2;O88485;Q3TYJ3	D3Z0M6;O88485-2;O88485;Q3TYJ3	Cytoplasmic dynein 1 intermediate chain 1	Dync1i1
E9PY16;Q8R2V5	E9PY16		Adap1
E9Q2W9	E9Q2W9		Actn4
E9Q2X2;Q6P9K9;A0A087WPQ9;Q6P9K9-2;E9Q3Q4;Q8C985	E9Q2X2;Q6P9K9;A0A087WPQ9;Q6P9K9-2	Neurexin-3	Nrxn3
E9Q4M4;Q91VN4	E9Q4M4;Q91VN4	MICOS complex subunit Mic25	Chchd6
F8WHW6;O70161-3;O70161;O70161-2;F7C0X9;D3YUY3;F8WI18;P70182-2;P70182;P70182-3;E0CYP4;F6SMP3	F8WHW6;O70161-3;O70161;O70161-2	Phosphatidylinositol 4-phosphate 5-kinase type-1 gamma	Pip5k1c
G3UX26;Q60930;D3YZT5;A0A286YCR8;D3YUN8	G3UX26;Q60930;D3YZT5;A0A286YCR8	Voltage-dependent anion-selective channel protein 2	Vdac2
G3UZM4;Q8BLQ9-3;Q8BLQ9-2;Q8BLQ9;D3Z0N3	G3UZM4;Q8BLQ9-3;Q8BLQ9-2;Q8BLQ9	Cell adhesion molecule 2	Cadm2
H3BKH6;Q9R0P3;H3BJP2;H3BLJ9;H3BJL6;H3BK43;H3BL99;H3BJC6	H3BKH6;Q9R0P3;H3BJP2;H3BLJ9;H3BJL6;H3BK43	S-formylglutathione hydrolase	Esd
J3QMG3;Q60931	J3QMG3;Q60931	Voltage-dependent anion-selective channel protein 3	Vdac3
O08917;G3UYU4;G3UZZ5;G3UWW8	O08917;G3UYU4;G3UZZ5;G3UWW8	Flotillin-1	Flot1
O35465;O35465-2;F6WP10	O35465;O35465-2	Peptidyl-prolyl cis-trans isomerase FKBP8	Fkbp8
O70503;O70503-2	O70503;O70503-2	Very-long-chain 3-oxoacyl-CoA reductase	Hsd17b12
O88543;D3Z036;F6YCA7	O88543	COP9 signalosome complex subunit 3	Cops3
O88544;D3YV99;F6QTS1;D3Z1R9	O88544;D3YV99;F6QTS1;D3Z1R9	COP9 signalosome complex subunit 4	Cops4
O88741;O88741-2;A0A087WQZ4	O88741	Ganglioside-induced differentiation-associated protein 1	Gdap1
O89053;G3UYK8;A0A0U1RPY8;D3YW57;G3UX53;D3YXM2	O89053;G3UYK8;A0A0U1RPY8	Coronin-1A;Coronin	Coro1a
P03899	P03899	NADH-ubiquinone oxidoreductase chain 3	Mtnd3
P28658	P28658	Ataxin-10	Atxn10
Q8C266;P35278;A2A5F5;A2A5F6	Q8C266;P35278	Ras-related protein Rab-5C	Rab5c
P40336;P40336-2	P40336;P40336-2	Vacuolar protein sorting-associated protein 26A	Vps26a
P42208;E9Q3V6;F6WYM0;D3YYB1;D3Z3C0;D3Z1S1;F6UKN5;D3YZU7;D3YV76	P42208;E9Q3V6;F6WYM0;D3YYB1;D3Z3C0	Septin-2	2018-09-02
P45878	P45878	Peptidyl-prolyl cis-trans isomerase FKBP2	Fkbp2
P47708;A0A0J9YV12;P70169	P47708	Rabphilin-3A	Rph3a
P47791-2;P47791	P47791-2;P47791	Glutathione reductase, mitochondrial	Gsr
P48771	P48771	Cytochrome c oxidase subunit 7A2, mitochondrial	Cox7a2
P57759;F8WJI4;F8WIM7;D6RG87	P57759	Endoplasmic reticulum resident protein 29	Erp29
P60202;P60202-2	P60202;P60202-2	Myelin proteolipid protein	Plp1
P60766-1	P60766-1	Cell division control protein 42 homolog	Cdc42
P61982	P61982	14-3-3 protein gamma;14-3-3 protein gamma, N-terminally processed	Ywhag
P62075;A0A1W2P756;A0A1W2P7H2	P62075;A0A1W2P756;A0A1W2P7H2	Mitochondrial import inner membrane translocase subunit Tim13	Timm13
P62137;A0A0J9YUG2	P62137	Serine/threonine-protein phosphatase PP1-alpha catalytic subunit	Ppp1ca
P62869	P62869	Transcription elongation factor B polypeptide 2	Tceb2
P63101;A0A2I3BQ03;D3YXN6;D3YXF4;D3YW45	P63101;A0A2I3BQ03	14-3-3 protein zeta/delta	Ywhaz
P68404-2;P68404	P68404-2;P68404	Protein kinase C beta type	Prkcb
Q60817;P70670	Q60817;P70670	Nascent polypeptide-associated complex subunit alpha;Nascent polypeptide-associated complex subunit alpha, muscle-specific form	Naca
P84084	P84084	ADP-ribosylation factor 5	Arf5
Q11136	Q11136	Xaa-Pro dipeptidase	Pepd
Q3UZJ4;Q61151;A0A1W2P838;A0A1W2P7D8	Q3UZJ4;Q61151	Serine/threonine-protein phosphatase 2A 56 kDa regulatory subunit epsilon isoform	Ppp2r5e
Q61206;A0A1L1SVK0;A0A1L1SQ76;A0A1L1SRD0;A0A1L1SSQ5;A0A1L1SQV7	Q61206;A0A1L1SVK0;A0A1L1SQ76;A0A1L1SRD0	Platelet-activating factor acetylhydrolase IB subunit beta	Pafah1b2
Q62443	Q62443	Neuronal pentraxin-1	Nptx1
Q640R3	Q640R3	Hepatocyte cell adhesion molecule	Hepacam
Q68FM6	Q68FM6	Protein phosphatase 1 regulatory subunit 29	Elfn2
Q6DFY2;G5E8G3	Q6DFY2;G5E8G3		Opcml
Q78J03	Q78J03	Methionine-R-sulfoxide reductase B2, mitochondrial	Msrb2
Q791V5;A2AFW6;Q9D050;D6RCZ1	Q791V5;A2AFW6;Q9D050	Mitochondrial carrier homolog 2	Mtch2
Q8BG32;G3UYH2;G3UYL8;G3UX15;G3UYI4;G3UZ33;G3UYL3;G3UWW7;G3UXL5;G3UX67;G3UWV7;G3UZ28	Q8BG32	26S proteasome non-ATPase regulatory subunit 11	Psmd11
Q8BH44;G3UW48;G3V005;G3UWZ2;G3UYG8	Q8BH44;G3UW48	Coronin-2B;Coronin	Coro2b
Q8BP67	Q8BP67	60S ribosomal protein L24	Rpl24
Q8CAQ8-2;Q8CAQ8-3;A0A0U1RP81;Q8CAQ8-4	Q8CAQ8-2;Q8CAQ8-3;A0A0U1RP81	MICOS complex subunit Mic60	Immt
Q8R123;Q8R123-2;F8WGX4	Q8R123;Q8R123-2	FAD synthase;Molybdenum cofactor biosynthesis protein-like region;FAD synthase region	Flad1
Q8R191	Q8R191	Synaptogyrin-3	Syngr3
Q91V12-2;E9PYH2;Q91V12-4;Q91V12;Q91V12-3	Q91V12-2;E9PYH2;Q91V12-4;Q91V12;Q91V12-3	Cytosolic acyl coenzyme A thioester hydrolase	Acot7
Q91XH5;G3UXX3;Q64105;G3UZ79	Q91XH5;G3UXX3;Q64105	Sepiapterin reductase	Spr
Q921M7;A0A2I3BRN5;A0A2I3BPH9;A0A2I3BQK1	Q921M7;A0A2I3BRN5	Protein FAM49B	Fam49b
Q99JI4;A0A286YDW8	Q99JI4;A0A286YDW8	26S proteasome non-ATPase regulatory subunit 6	Psmd6
Q9CQB4;Q9D855	Q9CQB4;Q9D855	Cytochrome b-c1 complex subunit 7	Uqcrb
Q9CRD0-3;Q9CRD0-2;Q9CRD0;A0A0J9YUK7;A0A0J9YUB6;A0A0J9YTV6;A0A0J9YTV7	Q9CRD0-3;Q9CRD0-2;Q9CRD0;A0A0J9YUK7;A0A0J9YUB6	OCIA domain-containing protein 1	Ociad1
Q9CZ30;B1AYJ9;Q9CZ30-2	Q9CZ30;B1AYJ9;Q9CZ30-2	Obg-like ATPase 1	Ola1
Q9CZM2;B8JKK2	Q9CZM2;B8JKK2	60S ribosomal protein L15;Ribosomal protein L15	Rpl15
Q9D898	Q9D898	Actin-related protein 2/3 complex subunit 5-like protein	Arpc5l
Q9DBJ1;O70250	Q9DBJ1	Phosphoglycerate mutase 1	Pgam1
Q9JIF7	Q9JIF7	Coatomer subunit beta	Copb1
Q9QXY6	Q9QXY6	EH domain-containing protein 3	Ehd3
Q9QYC0;F8WHZ9;F8WGR0;Q9QYC0-2;F6RDR0	Q9QYC0;F8WHZ9;F8WGR0;Q9QYC0-2	Alpha-adducin	Add1
Q9R0Q7;D3Z7C6	Q9R0Q7;D3Z7C6	Prostaglandin E synthase 3	Ptges3
Q9R1Q9;B7FAU7;Q3TKX1	Q9R1Q9;B7FAU7;Q3TKX1	V-type proton ATPase subunit S1	Atp6ap1
Q9Z2U1;A0A0G2JF97	Q9Z2U1	Proteasome subunit alpha type-5	Psma5

## Sheet: F_WT
Protein IDs	Majority protein IDs	Protein names	Gene names
A0A087WPL5;E9QNN1;O70133-3;O70133;O70133-2;A0A0R4J2C3;Q3UR42	A0A087WPL5;E9QNN1;O70133-3;O70133;O70133-2	ATP-dependent RNA helicase A	Dhx9
A0A140T8J4;Q9R257	A0A140T8J4;Q9R257	Heme-binding protein 1	Hebp1
A0A1C7ZMY3;D3Z5K8;Q80Z38-3;Q80Z38-2;Q80Z38	A0A1C7ZMY3;D3Z5K8;Q80Z38-3;Q80Z38-2;Q80Z38	SH3 and multiple ankyrin repeat domains protein 2	Shank2
A0A1Y7VM65;Q9QUH0	A0A1Y7VM65;Q9QUH0	Glutaredoxin-1	Glrx
A0A286YD58;A0A286YDU3;Q9DCR2	A0A286YD58;A0A286YDU3;Q9DCR2	AP-3 complex subunit sigma-1	Ap3s1
A0A2I3BQP6;Q923T9-3;Q923T9-2;Q923T9;A0A286YDK9;A0A286YCH4;A0A286YCI7	A0A2I3BQP6;Q923T9-3;Q923T9-2;Q923T9	Calcium/calmodulin-dependent protein kinase type II subunit gamma	Camk2g
A0A2R8VJW0	A0A2R8VJW0
A2AC13;P60764	A2AC13;P60764	Ras-related C3 botulinum toxin substrate 3	Rac3
B1ATZ0;B1ATZ1;Q3UMA3;Q99LI8;B1ATY9;F6VV02	B1ATZ0;B1ATZ1;Q3UMA3;Q99LI8;B1ATY9	Hepatocyte growth factor-regulated tyrosine kinase substrate	Hgs
B1AZ46;Q8BKX1-4;Q8BKX1-3;Q8BKX1-2;Q8BKX1	B1AZ46;Q8BKX1-4;Q8BKX1-3;Q8BKX1-2;Q8BKX1	Brain-specific angiogenesis inhibitor 1-associated protein 2	Baiap2
D3YUM1;Q91YT0;D3Z1U9;D3Z0K1;D3YXX5;D6RG60	D3YUM1;Q91YT0;D3Z1U9	NADH dehydrogenase [ubiquinone] flavoprotein 1, mitochondrial	Ndufv1
D3YYM6;D3Z1S8;Q91V55;P97461	D3YYM6;D3Z1S8;Q91V55;P97461	40S ribosomal protein S5;40S ribosomal protein S5, N-terminally processed	Rps5
D3YZU5;D3YZU4;D3YZU1	D3YZU5;D3YZU4;D3YZU1	SH3 and multiple ankyrin repeat domains protein 1	Shank1
E9PUE7;Q5SSL4;Q5SSL4-2;Q5SSL4-4;Q5SSL4-3;H3BJY3;H3BL84;Z4YN68;H3BKT3;H3BKV6;Q6PAJ1	E9PUE7;Q5SSL4;Q5SSL4-2;Q5SSL4-4;Q5SSL4-3	Active breakpoint cluster region-related protein	Abr
E9PWP6;Q99NE5-7;F6TZK4;F6Y0S3;F6VBV0;F6VBT9;F6VBR4;Q99NE5-6;Q99NE5-5;Q99NE5-4;Q99NE5-3;Q99NE5;A0A1W2P6S9;Q99NE5-2	E9PWP6;Q99NE5-7;F6TZK4;F6Y0S3;F6VBV0;F6VBT9;F6VBR4;Q99NE5-6;Q99NE5-5;Q99NE5-4;Q99NE5-3;Q99NE5	Regulating synaptic membrane exocytosis protein 1	Rims1
E9PZF0;Q01768;Q5NC80;Q5NC79	E9PZF0;Q01768;Q5NC80	Nucleoside diphosphate kinase;Nucleoside diphosphate kinase B	Gm20390;Nme2;Nme1
E9Q1S3;Q01405;A2AN97;A2AN98;A2AN99;A2ANA0;Q9D662	E9Q1S3;Q01405	Protein transport protein Sec23A	Sec23a
E9QAQ5;Q9WV60	E9QAQ5;Q9WV60	Glycogen synthase kinase-3 beta	Gsk3b
F6RJV6;Q9JJK2	F6RJV6;Q9JJK2	LanC-like protein 2	Lancl2
G3XA25;Q8CAY6	G3XA25;Q8CAY6	Acetyl-CoA acetyltransferase, cytosolic	Acat2
H3BJZ7;Q4KUS2;H3BKY4;H3BJL3;E9Q263;A0A140LHX5;A0A140LJ69;Q9Z1N9-2;Q9Z1N9-3;Q9Z1N9;Q8K0T7	H3BJZ7;Q4KUS2	Protein unc-13 homolog A	Unc13a
H7BX95;Q6PDM2-3;Q6PDM2-2;Q6PDM2;F7AI47;F6QXN3	H7BX95;Q6PDM2-3;Q6PDM2-2;Q6PDM2;F7AI47	Serine/arginine-rich splicing factor 1	Srsf1
Q497W9;O35286;A0A0G2JG10;A0A0G2JGQ5	Q497W9;O35286;A0A0G2JG10	Pre-mRNA-splicing factor ATP-dependent RNA helicase DHX15	Dhx15
O35449	O35449	Proline-rich transmembrane protein 1	Prrt1
P00405	P00405	Cytochrome c oxidase subunit 2	Mtco2
P10852-2;P10852;A0A0U1RPK4;A0A0U1RP98;A0A0U1RPL8;A0A0U1RPQ7	P10852-2;P10852;A0A0U1RPK4	4F2 cell-surface antigen heavy chain	Slc3a2
P20065-2;P20065	P20065-2	Thymosin beta-4;Hematopoietic system regulatory peptide	Tmsb4x
P21126;F8WHM4	P21126	Ubiquitin-like protein 4A	Ubl4a
P24472;A0A1L1SS61	P24472	Glutathione S-transferase A4	Gsta4
P35235-2;P35235	P35235-2;P35235	Tyrosine-protein phosphatase non-receptor type 11	Ptpn11
P42932;H3BL49;H3BJB6;H3BLL1;H3BKG2;H3BKR8	P42932;H3BL49	T-complex protein 1 subunit theta	Cct8
P61164	P61164	Alpha-centractin	Actr1a
P62192	P62192	26S protease regulatory subunit 4	Psmc1
P62748;A0A1Y7VMK3	P62748;A0A1Y7VMK3	Hippocalcin-like protein 1	Hpcal1
P63276	P63276	40S ribosomal protein S17	Rps17
P99028	P99028	Cytochrome b-c1 complex subunit 6, mitochondrial	Uqcrh
Q05816	Q05816	Fatty acid-binding protein, epidermal	Fabp5
Z4YKA3;Z4YKB8;Q3TEA8-3;Q3TEA8-2;Q3TEA8;A2AM65;A2AM70;A2AM62;A2AM63	Z4YKA3;Z4YKB8;Q3TEA8-3;Q3TEA8-2;Q3TEA8;A2AM65	Heterochromatin protein 1-binding protein 3	Hp1bp3
Q3THK7	Q3THK7	GMP synthase [glutamine-hydrolyzing]	Gmps
Q3UGR5;Q3UGR5-2;D3YZI3	Q3UGR5	Haloacid dehalogenase-like hydrolase domain-containing protein 2	Hdhd2
Q3UHJ0;Q3UHJ0-2;A0A0N4SVA1	Q3UHJ0;Q3UHJ0-2	AP2-associated protein kinase 1	Aak1
Q60932-2;Q60932;F2Z471	Q60932-2;Q60932;F2Z471	Voltage-dependent anion-selective channel protein 1	Vdac1
Q60972;A2AFI9;A2AFJ1;Q60973;F6ZLC6	Q60972;A2AFI9;A2AFJ1;Q60973	Histone-binding protein RBBP4;Histone-binding protein RBBP7	Rbbp4;Rbbp7
Q8BTS0;Q61656;S4R1I6;B1ARB9;B1ARC0;S4R1E3	Q8BTS0;Q61656;S4R1I6	Probable ATP-dependent RNA helicase DDX5	Ddx5
Q61792;A2A6H0;A2A6G6;A2A6G7;A2A6G8;A2A6G9;A2A6G0;A2A6G4;A2A6H1;A2A6G5;E9Q0N6	Q61792;A2A6H0;A2A6G6;A2A6G7;A2A6G8;A2A6G9	LIM and SH3 domain protein 1	Lasp1
Q62093	Q62093	Serine/arginine-rich splicing factor 2	Srsf2
Q6GT24;O08709;A0A0A6YXQ7	Q6GT24;O08709	Peroxiredoxin-6	Prdx6
Q6ZPJ3	Q6ZPJ3	E2/E3 hybrid ubiquitin-protein ligase UBE2O	Ube2o
Q80SW1	Q80SW1	Putative adenosylhomocysteinase 2	Ahcyl1
Q80UG2;P70207	Q80UG2	Plexin-A4	Plxna4
Q80VD1	Q80VD1	Protein FAM98B	Fam98b
Q80VP0-2;Q80VP0	Q80VP0-2;Q80VP0	Tectonin beta-propeller repeat-containing protein 1	Tecpr1
Q8BK30	Q8BK30	NADH dehydrogenase [ubiquinone] flavoprotein 3, mitochondrial	Ndufv3
Q8CHT0	Q8CHT0	Delta-1-pyrroline-5-carboxylate dehydrogenase, mitochondrial	Aldh4a1
Q8JZP2;D3Z620	Q8JZP2	Synapsin-3	Syn3
Q91VR8	Q91VR8	Protein BRICK1	Brk1
Q91X97;D3YVA2;D3Z2Z8;D3Z1M0	Q91X97;D3YVA2;D3Z2Z8;D3Z1M0	Neurocalcin-delta	Ncald
Q99J08	Q99J08	SEC14-like protein 2	Sec14l2
Q99J99;A0A2R8VHT1;A0A2R8VHE5	Q99J99;A0A2R8VHT1	3-mercaptopyruvate sulfurtransferase	Mpst
Q9CPQ3;A0A2R8VHM4;A0A2R8VHJ4	Q9CPQ3;A0A2R8VHM4	Mitochondrial import receptor subunit TOM22 homolog	Tomm22
Q9CQ91;D3Z670	Q9CQ91	NADH dehydrogenase [ubiquinone] 1 alpha subcomplex subunit 3	Ndufa3
Q9CQI3;A0A2I3BR94;A0A2I3BPS1;D3Z2F6;D3YY16;Q9ERL7	Q9CQI3;A0A2I3BR94;A0A2I3BPS1	Glia maturation factor beta	Gmfb
Q9CQJ8	Q9CQJ8	NADH dehydrogenase [ubiquinone] 1 beta subcomplex subunit 9	Ndufb9
Q9CR68	Q9CR68	Cytochrome b-c1 complex subunit Rieske, mitochondrial;Cytochrome b-c1 complex subunit 11	Uqcrfs1
Q9CXY6	Q9CXY6	Interleukin enhancer-binding factor 2	Ilf2
Q9D892	Q9D892	Inosine triphosphate pyrophosphatase	Itpa
Q9D8B3	Q9D8B3	Charged multivesicular body protein 4b	Chmp4b
Q9DBE8;F6RBY3	Q9DBE8	Alpha-1,3/1,6-mannosyltransferase ALG2	Alg2
Q9QZM0;Q99NB8	Q9QZM0	Ubiquilin-2	Ubqln2
Q9R0X4;Q32MW3	Q9R0X4;Q32MW3	Acyl-coenzyme A thioesterase 9, mitochondrial;Acyl-coenzyme A thioesterase 10, mitochondrial	Acot9;Acot10
Q9R111;D3YU09	Q9R111;D3YU09	Guanine deaminase	Gda
Q9R1P1;D3YUM8	Q9R1P1	Proteasome subunit beta type-3	Psmb3
Q9Z1P6	Q9Z1P6	NADH dehydrogenase [ubiquinone] 1 alpha subcomplex subunit 7	Ndufa7
Q9Z2D6-2;Q9Z2D6;D3Z7U4	Q9Z2D6-2;Q9Z2D6	Methyl-CpG-binding protein 2	Mecp2
Q9Z2Y3-3;Q9Z2Y3;Q9Z2Y3-2;E9Q0I8;E9Q0I7;D3Z6A7;D3Z6A8;Q3UVL6;D3Z6A9;Q9Z2Y3-5;Q9Z2Y3-4;Q501M9;A0A140LHR9;A0A140LJ06;E9Q4F9;Q9QWW1-2;Q9QWW1;Q99JP6;Q99JP6-2	Q9Z2Y3-3;Q9Z2Y3;Q9Z2Y3-2;E9Q0I8;E9Q0I7;D3Z6A7	Homer protein homolog 1	Homer1

## Sheet: STRING_GO
String-db server 11/7/2018 accessed
Highest confidence (0.9) was enabled for building protein-protein interaction networks
All interaction sources of data were used
M-wt	Pathway	FDR	neglogFDR		M-ko	Pathway	FDR	neglogFDR
GOCC	Membrane-bound vesicle	6.69e-22	21.1746		GOCC	Vesicle	1.52e-15	14.8182
GOCC	Neuron projection	8.88e-09	8.05159		GOCC	Neuron projection	3.32e-05	4.47886
GOCC	Axon	5.67e-05	4.24642		KEGG	GABAergic synapse	0.000253	3.59688
GOBP	Substantia nigra development	0.00441	2.35556		KEGG	Serotinergic synapse	0.000253	3.59688
GOBP	Membrane fusion	0.00873	2.05899		KEGG	Morphine addiction	0.000253	3.59688
GOBP	Organelle transport along microtubule	0.0181	1.74232		KEGG	Dopaminergic synapse	0.000773	3.11182
KEGG	Dopaminergic synapse	0.0261	1.58336		KEGG	Alcoholism	0.00119	2.92445
GOBP	Behavior	0.0329	1.4828		KEGG	Cocaine addiction	0.00152	2.81816
GOBP	Brain development	0.0416	1.38091		KEGG	Long-term Depression	0.00278	2.55596
GOCC	Postsynaptic density	0.0176	1.75449		KEGG	Glutamatergic synapse	0.00292	2.53462
GOBP	Organelle fusion	0.0416	1.38091		KEGG	Amphetamine addiction	0.003	2.52288
					KEGG	Cholinergic synapse	0.0152	1.81816
					KEGG	Oxidative phosphorylation	0.0046
F-wt	Pathway	FDR	neglogFDR
GOCC	Vesicle	2.38e-09	8.62342		F-ko	Pathway	FDR	neglogFDR
GOCC	Neuronal postsynaptic density	7.55e-06	5.12205		GOCC	Vesicle	1.51e-18	17.821
GOCC	Synapse	0.000192	3.7167		GOCC	Membrane-bound vesicle	2.3e-18	17.6383
GOBP	Positive regulation of synaptic transmission	0.00821	2.08566		GOCC	Synapse	0.000395	3.4034
GOBP	Regulation of synaptic plasticity	0.0168	1.77469		GOBP	Vesicle mediated transport	0.00452	2.34486
GOBP	Learning	0.0222	1.65365		GOBP	Protein localization	0.00452	2.34486
GOCC	Excitatory synapse	0.0479	1.31966		GOCC	Neuron projection	0.00537	2.27003
